# Supplementary material for: Moonlight Is Perceived as a Signal Promoting Genome Reorganization, Changes in Protein and Metabolite Profiles and Plant Growth
Source: Plants (Basel). 2023 Mar 2;12(5):1121. doi: 10.3390/plants12051121 (PMC10004791; doi:10.3390/plants12051121)
Supplement: Supplementary file 1 [file plants-12-01121-s001.zip › Supporting Tables Singiri et al.xlsx]

## Sheet: Table S1
Table S1. List of total metabolites present in leaves of Full moonlight FML-1 hr, Dark-1hr, FML-5hr and Dark-5hr exposed plants of Nicotiana tabacum
	1 h exposure												5 h exposure
metabolite name	Dark-1-1	Dark-1-2	Dark-1-3	Dark-1-4	Dark-1-5	Dark-1-6	FML1-1	FML1-2	FML1-3	FML1-4	FML1-5	FML1-6	Dark-5-1	Dark-5-2	Dark-5-3	Dark-5-4	Dark-5-5	Dark-5-6	FML5-1	FML5-2	FML5-3	FML5-4	FML5-5	FML5-6	avg Dark1	avg FML1	avg Dark5	avg FML5	p-value (FML1/D1)	FC (FML1/D1)	p-value (FML5/D5)	FC (FML5/D5)
1,2,3-Propanetriol, 1-(4-hydroxy-3-methoxyphenyl)	2.67e-05	1.89e-05	2e-05	2.38e-05	2.25e-05	1.83e-05	2.37e-05	2.72e-05	2.79e-05	2.77e-05	2.57e-05	2.64e-05	2.95e-05	2.63e-05	2.91e-05	2.62e-05	2.62e-05	3.16e-05	2.33e-05	1.72e-05	2.39e-05	2.12e-05	2.01e-05	2.06e-05	2.17e-05	2.64333e-05	2.815e-05	2.105e-05	0.00912428	1.21813	0.000371387	0.74778
1-Pyrroline-3-hydroxy-5-carboxylic-acid	0.00214099	0.000873126	0.000750475	0.000714015	0.000694598	0.00071494	0.000758056	0.000723977	0.00105228	0.00163394	0.000637018	0.000693587	0.000621769	0.000622228	0.000693433	0.000670448	0.000699676	0.000661014	0.000655023	0.00107111	0.000924479	0.00180306	0.0010215	0.00112096	0.000981357	0.000916477	0.000661428	0.00109936	0.821639	0.933887	0.0189403	1.66209
6-deoxy-Mannopyranose	0.00130534	0.00116986	0.00115012	0.00125535	0.00116258	0.000963136	0.00171822	0.00170374	0.0016428	0.00148561	0.00162178	0.00172949	0.00153967	0.00138869	0.00144481	0.00141201	0.00132885	0.00139538	0.00137502	0.0013268	0.00149106	0.00149347	0.00153754	0.0015409	0.00116773	0.00165027	0.00141823	0.0014608	1.24496e-05	1.41323	0.380161	1.03001
Aconitic acid	8.34e-05	0.0001181	0.000113383	0.000111949	0.000100406	0.000110787	0.000120385	0.000114235	9.97e-05	7.68e-05	0.000117568	0.000104138	0.000126664	0.000135519	0.000135475	0.000134404	0.000125795	0.000117491	0.00014443	0.000120984	0.000155534	0.00011668	0.000148678	0.000129173	0.000106337	0.000105471	0.000129225	0.000135913	0.919623	0.991851	0.369566	1.05176
Adenosine	0.0659272	0.0556949	0.0573971	0.0623443	0.0582878	0.0548969	0.0603161	0.0698768	0.059341	0.0618238	0.0603637	0.0609577	0.0584012	0.0546674	0.0581382	0.0568977	0.0558136	0.0588523	0.0593141	0.0626372	0.0628421	0.0643543	0.0609106	0.0654791	0.0590914	0.0621132	0.0571284	0.0625896	0.227396	1.05114	0.000703259	1.09559
Alanine	0.00312649	0.00164382	0.00130318	0.00298806	0.00203199	0.00185111	0.00108352	0.00118356	0.00134779	0.000791714	0.000691341	0.000866946	0.000543105	0.00133133	0.00227862	0.00168426	0.0010139	0.00116923	0.00155755	0.00209149	0.00135674	0.00259391	0.00314549	0.00290779	0.00215744	0.000994146	0.00133674	0.00227549	0.00447383	0.460799	0.0345371	1.70227
Arabinonic acid	0.00178919	0.0013351	0.00148071	0.00157797	0.00158013	0.00142016	0.00155987	0.00161617	0.00142067	0.00130093	0.00141999	0.00143313	0.00155582	0.00149959	0.00148124	0.00166285	0.00172566	0.00164515	0.00172627	0.00166662	0.00228088	0.00188714	0.00191711	0.00173389	0.00153054	0.00145846	0.00159505	0.00186865	0.383942	0.952904	0.0209163	1.17153
Arabinose	0.000561953	0.000708292	0.000738881	0.000728723	0.000712912	0.000633406	0.000762588	0.000871059	0.000875536	0.000865314	0.000789871	0.000787272	0.000795013	0.00064125	0.00062292	0.00080569	0.000720078	0.000726004	0.000886455	0.000922235	0.000950213	0.000979153	0.00092323	0.000929677	0.000680694	0.000825273	0.000718492	0.000931827	0.00202881	1.2124	7.92089e-05	1.29692
Arabitol	0.00138051	0.00126923	0.00132074	0.00129591	0.00119647	0.00115762	0.00159605	0.00164089	0.00161347	0.0016015	0.00157075	0.00154042	0.00147716	0.00155039	0.00136416	0.0013124	0.00136352	0.00139409	0.00162027	0.00146252	0.0015737	0.00140175	0.00155999	0.00151703	0.00127008	0.00159385	0.00141029	0.00152254	4.49337e-06	1.25492	0.0425601	1.0796
Ascorbic acid	0.00630099	0.00427165	0.00404051	0.00373396	0.00316448	0.00423828	0.00453282	0.00322423	0.000673498	0.00404056	0.00406803	0.00320334	0.00430785	0.00356155	0.00368543	0.00462287	0.00421894	0.00290765	0.00437264	0.00535436	0.00414462	0.00529408	0.00436731	0.00221571	0.00429164	0.00329041	0.00388405	0.00429145	0.190605	0.766702	0.45946	1.10489
Aspartic acid	0.000318706	0.000262983	0.000281	0.00028394	0.000274788	0.000321357	0.00074438	0.000777232	0.000695069	0.000705001	0.00070419	0.000716996	0.000415687	0.000434334	0.000432983	0.000437435	0.000446932	0.000466963	0.000407527	0.000361856	0.000472338	0.000363617	0.00035566	0.00036344	0.000290462	0.000723811	0.000439056	0.000387406	1.15575e-10	2.49193	0.0266376	0.882363
Benzene-1,2,4-triol	0.000409128	0.000411549	0.000426237	0.000437484	0.000399587	0.000381272	0.000529697	0.000582985	0.00043328	0.000427438	0.000465787	0.000473215	0.00051716	0.000448438	0.00047523	0.000469746	0.000427333	0.000469495	0.000417207	0.000441525	0.000484998	0.000450266	0.000491579	0.000461572	0.000410876	0.0004854	0.0004679	0.000457858	0.0163008	1.18138	0.561185	0.978537
Benzoic acid	0.00189976	0.00165593	0.00184982	0.00209673	0.00179511	0.00164973	0.00188195	0.00280342	0.00204355	0.0025774	0.00243111	0.00225491	0.00260413	0.00186264	0.00243793	0.00228306	0.00224587	0.00234111	0.00184513	0.00210346	0.00204275	0.00201291	0.00224038	0.00212685	0.00182451	0.00233206	0.00229579	0.00206191	0.00847845	1.27818	0.0689015	0.898129
beta-Galactopyranosyl-1,3-arabinose	0.00496761	0.00631563	0.00579739	0.00554083	0.00567337	0.00578838	0.00931441	0.00847478	0.0105128	0.0084094	0.0098322	0.00858919	0.00653017	0.00857672	0.00709458	0.00748606	0.0063429	0.00871647	0.0086643	0.00866866	0.00911338	0.00891432	0.00944425	0.00897273	0.00568054	0.00918879	0.00745782	0.00896294	4.37741e-06	1.61759	0.00559778	1.20182
Butanoic acid	0.00189721	0.00102404	0.000935598	0.00131911	0.00141565	0.000832565	0.0015792	0.00127351	0.00229866	0.00120604	0.000857311	0.000525352	0.000442074	0.000783052	0.000360107	0.00084317	0.000449366	0.000891751	0.000703817	0.00125816	0.00104477	0.00151998	0.00122712	0.00194682	0.00123736	0.00129001	0.000628253	0.00128344	0.863045	1.04255	0.00779473	2.04287
Caffeic acid	0.00136486	0.000802446	0.000917061	0.000992221	0.00108058	0.00105664	0.00165433	0.00148068	0.00137646	0.00209166	0.00133385	0.00110143	0.00150827	0.00111897	0.00118625	0.000939419	0.000809418	0.000596447	0.000571614	0.00061354	0.00061383	0.000700427	0.00056242	0.000615687	0.00103563	0.0015064	0.00102646	0.00061292	0.0141959	1.45457	0.01037	0.597119
Carbodiimide	0.00454364	0.00796217	0.00909469	0.0226759	0.0167929	0.00861474	0.00836279	0.018568	0.0154223	0.0132596	0.00815274	0.00872993	0.00943879	0.0111357	0.0152146	0.0186645	0.00911463	0.0180551	0.0109728	0.0461975	0.0139266	0.0155499	0.030137	0.00106371	0.011614	0.0120826	0.0136039	0.0196412	0.889281	1.04034	0.393742	1.4438
Cellobiose	0.00549247	0.00484174	0.00507671	0.00496955	0.00498067	0.00460892	0.0040526	0.00417102	0.00379543	0.00381979	0.00391175	0.00392388	0.00740044	0.00830442	0.00741242	0.00782766	0.00512319	0.00568323	0.00473159	0.0049799	0.00513217	0.00518306	0.00507377	0.00529191	0.00499501	0.00394574	0.00695856	0.0050654	1.32082e-05	0.789937	0.0045982	0.727938
Cholesterol	0.000290089	2.99e-05	0.000208811	0.000280473	0.000246673	0.000250147	0.000266365	0.000277288	0.000228871	0.000257898	0.000277615	0.0002771	0.000256408	0.000276789	0.00026494	0.000275378	0.000255628	0.000275302	0.000279271	0.000998949	0.000288855	0.000282575	0.000377335	0.000256272	0.000217682	0.000264189	0.000267408	0.000413876	0.273035	1.21365	0.244009	1.54774
Citric acid	0.010571	0.0112911	0.0118482	0.0124231	0.0118754	0.0113534	0.0137918	0.0133869	0.0130359	0.00922418	0.0127249	0.0129984	0.0144516	0.015356	0.0156971	0.0158979	0.0152138	0.0158503	0.0161314	0.0174365	0.0177766	0.0165338	0.017454	0.0174172	0.0115604	0.012527	0.0154111	0.0171249	0.212269	1.08362	0.000538415	1.11121
Dehydroascorbic acid	0.000506733	0.000567772	0.000524257	0.000456678	0.00049336	0.000557326	0.000586437	0.000502314	0.000340958	0.000362987	0.000547367	0.000473567	0.000521599	0.000522839	0.000502606	0.000510615	0.000474185	0.000500614	0.00056904	0.000618841	0.000603486	0.000580401	0.000620275	0.000467199	0.000517688	0.000468938	0.00050541	0.00057654	0.29056	0.905833	0.015845	1.14074
Erythritol	0.000271831	0.000266714	0.000266572	0.000275409	0.000267443	0.000216615	0.000318417	0.000341165	0.000318259	0.000305063	0.000327579	0.000338626	0.00033562	0.000359773	0.000342782	0.000334863	0.000337118	0.000340412	0.000283423	0.000301318	0.000324861	0.000308552	0.00033142	0.000292355	0.000260764	0.000324851	0.000341761	0.000306988	0.000119711	1.24577	0.00213348	0.898253
Erythrose	0.00150801	0.00172661	0.00152489	0.00114103	0.0014462	0.00148705	0.00163011	0.00121023	0.000287191	0.000933117	0.00186098	0.00131722	0.0016007	0.00181453	0.00143671	0.00161539	0.00146301	0.00121767	0.00215631	0.00152479	0.00192493	0.00172244	0.0022457	0.00135421	0.0014723	0.00120648	0.00152467	0.0018214	0.292817	0.819452	0.103431	1.19462
Fructose	0.00847691	0.00773227	0.00791813	0.00811814	0.00751673	0.00781207	0.0096268	0.0109836	0.0118383	0.0100278	0.00982577	0.0105988	0.00899347	0.00893242	0.00914786	0.00977841	0.00869337	0.0129967	0.00969049	0.00922475	0.0103469	0.00999922	0.00971694	0.0100431	0.00792904	0.0104835	0.00975703	0.0098369	3.86102e-05	1.32217	0.909243	1.00819
Fumaric acid	0.000137292	0.000114125	0.000112219	0.000116278	0.00010105	0.000102112	0.000110423	0.000133751	0.000116775	0.000159503	0.00012748	0.000124995	0.000147639	0.000125783	0.000139627	0.000125304	0.000122605	0.000121057	0.000122682	0.000118863	0.000131496	0.000135654	0.000145274	0.000123945	0.000113846	0.000128821	0.000130336	0.000129652	0.119799	1.13154	0.910676	0.994756
Furan-2-carboxylic acid	6.09e-05	5.46e-05	5.6e-05	7.44e-05	6.58e-05	5.31e-05	7.06e-05	8.16e-05	7.02e-05	6.67e-05	8.15e-05	7.43e-05	0.000102289	7.78e-05	7.37e-05	7.89e-05	7.48e-05	7.39e-05	7e-05	8.04e-05	8.44e-05	8.81e-05	8.39e-05	8.47e-05	6.08e-05	7.415e-05	8.02315e-05	8.19167e-05	0.00958363	1.21957	0.751921	1.021
Galactonic acid	0.00203888	0.0018451	0.00187061	0.00205331	0.00194021	0.00188929	0.00180423	0.00169688	0.00194104	0.00175703	0.00175015	0.00175794	0.0014017	0.00150026	0.00156917	0.00146387	0.00146052	0.00161202	0.00172705	0.001833	0.00195212	0.00189154	0.00187121	0.00193107	0.00193957	0.00178454	0.00150126	0.00186766	0.0109351	0.920073	1.14737e-05	1.24407
Galactose	0.000356325	0.000651882	0.000504345	0.000382866	0.000416041	0.000648533	0.000732049	0.00741744	0.00707693	0.00687628	0.000367801	0.000480966	0.000675399	0.000434467	0.000397078	0.00806473	0.000343927	0.0085686	0.000653473	0.000790924	0.000785898	0.000383216	0.000773476	0.00661303	0.000493332	0.00382524	0.0030807	0.00166667	0.0478874	7.75389	0.480915	0.541004
Gentiobiose	0.00193643	0.00215679	0.00223068	0.00201597	0.00206155	0.00197334	0.00312941	0.00275011	0.00318557	0.00244419	0.00292963	0.0028046	0.00228767	0.0030086	0.00242562	0.00249267	0.00230364	0.00263241	0.00337411	0.00357596	0.00369154	0.00342904	0.00379085	0.00343305	0.00206246	0.00287392	0.0025251	0.00354909	5.03888e-05	1.39344	1.26476e-05	1.40552
Gluconic acid	0.00203888	0.0018451	0.00188894	0.00205331	0.00190936	0.00189523	0.00180423	0.00164217	0.00194104	0.00175703	0.00173873	0.00175794	0.0014017	0.00150474	0.00155299	0.00149602	0.00146052	0.00161202	0.0017217	0.001833	0.00198223	0.00188447	0.00187121	0.00192372	0.00193847	0.00177352	0.00150467	0.00186939	0.0113224	0.914907	1.46329e-05	1.24239
Glucopyranose	0.0109841	0.00993437	0.0111458	0.0153481	0.00757541	0.0108027	0.0107976	0.0151801	0.00891064	0.0109873	0.0199247	0.015298	0.0170936	0.0108195	0.0228414	0.01826	0.0150353	0.0192419	0.0137145	0.0134211	0.0138503	0.0119646	0.023612	0.0106444	0.0109651	0.0135164	0.0172153	0.0145345	0.21957	1.23267	0.310654	0.844278
Glucose	0.0330571	0.030091	0.0303619	0.0310495	0.0297944	0.0295349	0.0306011	0.034336	0.0315385	0.0304378	0.0303479	0.0323199	0.0325402	0.0317136	0.0320113	0.0357154	0.0308907	0.0375549	0.0305378	0.0307976	0.0319849	0.0315723	0.0314783	0.0307192	0.0306481	0.0315968	0.0334044	0.0311817	0.275032	1.03095	0.070231	0.933461
Glucose, 1,6-anhydro	0.00100916	0.000821118	0.000883909	0.0010246	0.000854605	0.000807486	0.00103703	0.00113874	0.000995428	0.00102282	0.00103336	0.00106614	0.00109931	0.00110219	0.00116745	0.00144182	0.00105936	0.0011103	0.00106037	0.00109837	0.00110832	0.00118878	0.00109554	0.00104209	0.000900145	0.00104892	0.00116341	0.00109891	0.00656739	1.16528	0.315852	0.944564
Glucose-6-phosphate	0.000460653	0.000638965	0.000653352	0.000554895	0.00061395	0.000630168	0.000586728	0.000479196	0.00047411	0.000311054	0.000540857	0.000532048	0.000395019	0.000520859	0.000451422	0.00044869	0.000415423	0.000413151	0.000593339	0.000580394	0.00060765	0.000526782	0.000634481	0.000603837	0.000591997	0.000487332	0.000440761	0.00059108	0.0592529	0.8232	8.05486e-05	1.34105
Glucuronic acid	0.000191602	0.00019633	0.00017479	0.000186159	0.000189639	0.000178258	0.00021269	0.000237452	0.000250307	0.000225508	0.000231481	0.000224637	0.000155952	0.000160195	0.000180798	0.00016153	0.000156885	0.000177531	0.000194344	0.000183779	0.000199169	0.000185186	0.000206692	0.000236218	0.00018613	0.000230346	0.000165482	0.000200898	3.19232e-05	1.23756	0.00288953	1.21402
Glutamic acid	0.000528089	0.00112659	0.000655958	0.000406405	0.00051415	0.000591443	0.000387267	0.000100891	0.000318081	0.000173111	0.000142334	0.000110116	0.000103385	0.000489831	0.00018989	0.000375384	0.000174485	0.000234609	0.000540699	0.00223073	0.00190776	0.00236718	0.00230799	0.00231511	0.000637106	0.0002053	0.000261264	0.00194491	0.00364693	0.322238	0.000194819	7.44424
Glutamine	0.0070389	0.00257946	0.00151097	0.00118992	0.0014487	0.00136779	0.0012013	0.00054885	0.00262877	0.00360852	0.000408722	0.000356448	0.00037188	0.000661913	0.000481959	0.00082007	0.000431584	0.000646652	0.000857337	0.00314936	0.00243155	0.00714551	0.00336552	0.00401876	0.00252262	0.00145877	0.00056901	0.00349468	0.347151	0.578274	0.00655922	6.14168
Glutaric acid	5e-05	4.27e-05	4.66e-05	4.62e-05	4.19e-05	4.48e-05	5.35e-05	6.88e-05	5.01e-05	5.32e-05	5.53e-05	5.48e-05	7.1e-05	4.76e-05	6.83e-05	4.14e-05	6.11e-05	5.29e-05	4.89e-05	5.49e-05	6.1e-05	4.93e-05	5.65e-05	5.48e-05	4.53667e-05	5.595e-05	5.705e-05	5.42333e-05	0.00476519	1.23328	0.595924	0.950628
Glyceric acid	0.038925	0.0348622	0.0350403	0.0376359	0.0359251	0.033796	0.0384421	0.044151	0.0407672	0.0393728	0.0408491	0.0400526	0.0343574	0.0344366	0.0361299	0.0362602	0.0340664	0.0359009	0.0339152	0.0352073	0.0356479	0.0357042	0.0356737	0.0359326	0.0360308	0.0406058	0.0351919	0.0353468	0.00216576	1.12698	0.767429	1.0044
Glycerol-3-phosphate	0.00044655	0.000412836	0.000424343	0.000393753	0.000399709	0.00041636	0.000437604	0.000366243	0.000385493	0.000403305	0.000413352	0.000408967	0.000311849	0.000387811	0.00035415	0.000342778	0.000339562	0.000337303	0.000440967	0.000470881	0.000513624	0.00049239	0.000491574	0.000423661	0.000415592	0.000402494	0.000345576	0.000472183	0.323334	0.968484	2.49879e-05	1.36637
Glycerophosphoglycerol	0.000933971	0.000850095	0.000955291	0.000829497	0.00102154	0.000780696	0.00111349	0.000948688	0.000942548	0.000950983	0.00100361	0.000928728	0.000954868	0.00107779	0.00103922	0.000858899	0.000956039	0.000908362	0.000860931	0.000860149	0.000711006	0.000812379	0.000909743	0.000704471	0.000895181	0.000981341	0.000965863	0.00080978	0.0933587	1.09625	0.00860964	0.8384
Glycinamide	0.00013773	0.000212633	0.000170261	0.000269919	0.000155458	0.00013583	0.000245773	0.000243561	0.000167906	0.000138942	0.000118214	0.00012078	0.000131936	0.000113328	0.00018165	0.000186954	0.000142178	0.000178955	0.000183777	0.000219221	0.000193156	0.000271478	0.000199681	0.000282909	0.000180305	0.000172529	0.000155834	0.000225037	0.813077	0.956874	0.00877894	1.44409
Glycine	0.000995377	0.00186192	0.00165144	0.00120959	0.00164065	0.00184434	0.000476554	0.000392045	0.000351611	0.000290208	0.000840971	0.000597984	0.00150124	0.00231214	0.00132263	0.00159084	0.00133821	0.00183363	0.00149907	0.00220011	0.00252505	0.0020905	0.00215315	0.00163572	0.00153389	0.000491562	0.00164978	0.00201727	9.21437e-05	0.320469	0.123408	1.22275
Gulonic acid	0.000196811	0.000172804	0.000176098	0.000177568	0.000178864	0.000170542	0.00018468	0.000195095	0.000184934	0.000179998	0.000197822	0.000186646	0.000173272	0.000183149	0.000187677	0.000190474	0.000171549	0.000159773	0.000192081	0.000184687	0.000210242	0.000227236	0.000206268	0.000190074	0.000178781	0.000188196	0.000177649	0.000201765	0.0743932	1.05266	0.0132676	1.13575
Hydrocaffeic acid	9.24e-05	7.48e-05	0.000103389	0.000100714	7.79e-05	0.000114126	6.95e-05	0.000102136	7.68e-05	9.85e-05	8.38e-05	8.01e-05	0.000143335	0.000120772	0.000135765	0.000133903	0.000130802	0.000128992	0.000104465	0.000114989	0.000134955	0.000127092	0.000120329	0.000112608	9.38882e-05	8.51393e-05	0.000132261	0.000119073	0.306507	0.906816	0.0345131	0.900285
Hydroquinone	0.0028923	0.00222702	0.00232905	0.00235277	0.00229138	0.00204441	0.00236709	0.00297028	0.002184	0.00254121	0.00232882	0.00240231	0.00262019	0.00218221	0.00251257	0.00242738	0.00243183	0.00241108	0.00214653	0.00235838	0.00225191	0.00257601	0.00236074	0.00239678	0.00235615	0.00246562	0.00243088	0.00234839	0.512207	1.04646	0.346563	0.966067
Inositol	0.0435911	0.0376827	0.0391065	0.0403685	0.03927	0.0367076	0.046574	0.0525083	0.045447	0.0465384	0.0456978	0.0468108	0.0412995	0.0416119	0.0412868	0.0411778	0.0398373	0.042058	0.0486032	0.0493333	0.0501735	0.052265	0.0510832	0.0503703	0.0394544	0.0472627	0.0412119	0.0503047	0.000311187	1.19791	3.59648e-08	1.22064
Isoleucine	0.000604502	0.00101358	0.00095784	0.000791774	0.00103587	0.00108576	0.000569136	0.000492395	0.00041129	0.000248035	0.000608733	0.000413709	0.000757769	0.00118619	0.000717155	0.000811771	0.00066217	0.000606818	0.00157986	0.00169072	0.00166955	0.00156769	0.00183089	0.00166799	0.000914887	0.000457216	0.000790312	0.00166778	0.000537648	0.499752	2.65863e-06	2.11029
Itaconic acid	0.0123198	0.000704981	0.010505	0.0106284	0.00057006	0.00994618	0.0100863	0.010434	0.0102455	0.0116542	0.0100548	0.0102399	0.0101754	0.00918344	0.00979963	0.00960234	0.00931119	0.00970415	0.00861685	0.00860389	0.00942542	0.00934009	0.00914711	0.00914223	0.00744572	0.0104525	0.00962936	0.00904593	0.199989	1.40382	0.0174494	0.939411
Lactic acid	0.0031831	0.00152445	0.00176878	0.00209639	0.0015189	0.00208281	0.00124294	0.00291267	0.00202231	0.00116693	0.00210889	0.00162524	0.00246325	0.00140999	0.00227656	0.00241532	0.00237085	0.00249646	0.00217562	0.00328354	0.00220053	0.00163907	0.00268544	0.00250556	0.00202907	0.0018465	0.00223874	0.00241496	0.629305	0.910021	0.546783	1.07871
Lactose	0.000114246	4.98e-05	0.000173278	0.000214681	0.000157687	0.000116818	0.000266637	4.26e-05	7.4e-05	7.81e-05	4.35e-05	0.000263392	0.000515293	0.000493313	0.000453903	0.000509145	0.000359819	7.87e-05	0.000270491	0.000313678	9.29e-05	4.69e-05	0.000405404	5.39e-05	0.000137752	0.000128038	0.000401696	0.000197212	0.848549	0.929485	0.0519765	0.490949
Laminaribiose	0.00133917	0.00123846	0.00121941	0.00109413	0.00121232	0.00115164	0.000959261	0.000993641	0.000986414	0.000998448	0.00090659	0.00104173	0.00197404	0.00220681	0.00192974	0.00194926	0.0016378	0.00182174	0.0011493	0.00118104	0.00109413	0.00119416	0.0012256	0.0012262	0.00120919	0.000981014	0.0019199	0.0011784	0.000147597	0.8113	2.89525e-06	0.613785
Lumichrome	0.00177853	0.00140873	0.00164063	0.00154335	0.00146591	0.00152762	0.00206803	0.00205147	0.00168369	0.0021572	0.0016416	0.00150786	0.00196686	0.00147474	0.0014826	0.00142498	0.00163307	0.00121496	0.000998479	0.00121995	0.0020843	0.00139099	0.000994114	0.00111741	0.0015608	0.00185164	0.00153287	0.00130087	0.0403609	1.18634	0.26628	0.848654
Lysine	0.000692522	0.000510892	0.000475226	0.000589086	0.000572511	0.000527808	0.000595675	0.000687076	0.000670559	0.000634029	0.000569526	0.000528451	0.000642203	0.000649306	0.00068334	0.000694139	0.000677285	0.000694049	0.000420641	0.000440744	0.000506463	0.000504018	0.000459223	0.000477383	0.000561341	0.000614219	0.000673387	0.000468079	0.214562	1.0942	2.43954e-07	0.695111
Lyxonic acid	0.000895282	0.000847867	0.00100715	0.00110059	0.00101378	0.00092387	0.00119618	0.00085972	0.000701155	0.000877322	0.00103172	0.00101723	0.00114221	0.00122826	0.00121768	0.00117361	0.00119292	0.00127414	0.00117119	0.00115133	0.00136523	0.0011933	0.00131125	0.000717558	0.000964757	0.000947221	0.0012048	0.00115164	0.829996	0.981823	0.589049	0.955876
Lyxose	0.00294902	0.00270208	0.00265412	0.0026791	0.00277908	0.00273192	0.00261977	0.0028633	0.0030098	0.00285084	0.00273207	0.00288886	0.00233576	0.00257664	0.00247504	0.00238478	0.00233468	0.00236411	0.00263282	0.00260037	0.00271213	0.00272616	0.00268918	0.00283977	0.00274922	0.00282744	0.00241183	0.00270007	0.292049	1.02845	0.000243089	1.11951
Maleic acid	0.0203858	0.0189323	0.0194564	0.0193348	0.0179083	0.0181767	0.0221608	0.0222512	0.0210047	0.0214204	0.0219866	0.0221455	0.0186315	0.0182114	0.0179942	0.0177146	0.017831	0.0178237	0.0166454	0.0153123	0.0176656	0.0158685	0.0166343	0.015297	0.0190324	0.0218282	0.0180344	0.0162372	6.01121e-05	1.1469	0.00117021	0.900346
Malic acid	0.00120469	0.00111807	0.00122575	0.00118285	0.00121957	0.00112065	0.00139353	0.00146329	0.00137359	0.00135931	0.00145874	0.00146111	0.00113952	0.00120692	0.00114862	0.00112097	0.00105843	0.00109126	0.00158973	0.00157436	0.00166244	0.00145394	0.00154587	0.00149765	0.0011786	0.00141826	0.00112762	0.001554	6.1056e-06	1.20335	3.65545e-07	1.37812
Maltose	0.00549247	0.00484174	0.00507671	0.00496955	0.00498067	0.00460892	0.0040526	0.00417102	0.00379543	0.00381979	0.00391175	0.00392388	0.00740044	0.00830442	0.00741242	0.00782766	0.00704887	0.00755282	0.00472735	0.0049799	0.00513217	0.00518306	0.00507377	0.00529191	0.00499501	0.00394574	0.0075911	0.00506469	1.32082e-05	0.789937	1.29711e-07	0.667188
Mannitol	0.00704656	0.000503143	0.000525002	0.000382866	0.000416041	0.000648533	0.000732049	0.00741744	0.00707693	0.00687628	0.000367801	0.000403286	0.000675399	0.000435041	0.000397078	0.00792647	0.000343927	0.0085686	0.000653473	0.000790924	0.000785898	0.000383216	0.000773476	0.000358252	0.00158702	0.0038123	0.00305775	0.000624207	0.254897	2.40217	0.170074	0.204139
Mannopyranoside	0.00308784	0.00177414	0.00198777	0.00219399	0.00199218	0.00185903	0.00212907	0.0028097	0.0021613	0.00326596	0.00211256	0.00224894	0.00253186	0.00194848	0.00238598	0.0023591	0.00225384	0.00231066	0.00200629	0.00240187	0.0021382	0.00286338	0.00266445	0.00224519	0.00214916	0.00245459	0.00229832	0.00238657	0.29526	1.14212	0.581894	1.0384
Mannose-6-phosphate	0.000903556	0.00136283	0.00127668	0.00116908	0.00123418	0.00134685	0.00120661	0.000938544	0.000884725	0.000616122	0.0011132	0.00104374	0.000807273	0.00114999	0.000874269	0.000893202	0.000871267	0.000839149	0.00130336	0.00129118	0.00135798	0.00110819	0.00137135	0.00128179	0.00121553	0.000967157	0.000905858	0.00128564	0.0462546	0.795667	0.000133671	1.41925
Melibiose	0.000319704	0.000306888	0.000285301	0.000262702	0.000267748	0.000283244	0.000343155	0.000305591	0.000336708	0.000319837	0.000330938	0.000322873	0.000250102	0.000298447	0.00025774	0.000257368	0.000282881	0.000280926	0.000316066	0.000281372	0.000295211	0.000334163	0.000307483	0.000279135	0.000287598	0.000326517	0.000271244	0.000302238	0.00417565	1.13532	0.0235575	1.11427
Nicotine	0.0108624	0.0162843	0.0127896	0.00528965	0.00643558	0.0129362	0.0167704	0.0269461	0.0077704	0.00605203	0.0164257	0.0161425	0.0107739	0.0204461	0.0154761	0.00982489	0.0126668	0.0263099	0.0192138	0.0169907	0.0236734	0.00914155	0.0186069	0.00676367	0.0107663	0.0150178	0.0159163	0.0157317	0.253589	1.3949	0.961238	0.988401
Nicotinic acid	0.00132934	0.00121208	0.00160016	0.0015373	0.00139623	0.00153987	0.00162364	0.00132103	0.00139749	0.00139283	0.00148405	0.00166881	0.00160522	0.00170576	0.00161991	0.00144138	0.00144324	0.0011527	0.00253148	0.00219472	0.00270889	0.00205907	0.00257474	0.00204442	0.00143583	0.00148131	0.0014947	0.00235222	0.596099	1.03167	0.000129077	1.57371
Phenethylamine	0.00242082	0.000929948	0.00108014	0.00140177	0.00133835	0.000782345	0.00176984	0.00159204	0.00124018	0.00118152	0.000826161	0.000751546	0.00106417	0.00123255	0.00165978	0.00174656	0.00116435	0.00156291	0.000904618	0.00160079	0.00136102	0.00205273	0.00199384	0.0020874	0.00132556	0.00122688	0.00140505	0.00166673	0.741243	0.925556	0.27229	1.18624
Phenol	0.00038447	0.000343031	0.0003788	0.000446462	0.000375484	0.000329628	0.000399622	0.000583576	0.000348354	0.000369727	0.000395965	0.000402216	0.000426197	0.000350137	0.000406593	0.000459677	0.000368265	0.000417351	0.000350502	0.000358676	0.000380351	0.000370078	0.000386695	0.000393906	0.000376312	0.000416577	0.000404703	0.000373368	0.31751	1.107	0.106302	0.922572
Phenylalanine	0.000278487	0.000237941	0.00015725	0.000133733	0.000134843	0.000168701	0.000157958	8.76e-05	0.000132868	0.000182709	0.00011785	9.81e-05	9.17e-05	0.000169771	0.000115841	0.000144605	0.000118359	0.000126828	0.000187563	0.000511688	0.000439142	0.000627804	0.000496855	0.000453575	0.000185159	0.000129514	0.000127851	0.000452771	0.0788139	0.699475	0.000318054	3.54141
Phosphoric acid	0.00508896	0.00509753	0.00493751	0.00471561	0.00490424	0.00515166	0.00555299	0.00464956	0.00461849	0.00462606	0.00522474	0.00493225	0.00451277	0.00517712	0.00455126	0.00426531	0.00417411	0.00407286	0.00584138	0.00595761	0.00630397	0.00642593	0.00673306	0.00588015	0.00498259	0.00493401	0.0044589	0.00619035	0.781968	0.990252	1.27091e-05	1.38831
Proline	0.000581851	0.000181084	0.000170032	0.00023406	0.000187381	0.000176192	0.000110367	0.000123242	0.000160857	0.000236552	0.000108069	0.00011637	7.7e-05	9.25e-05	0.000120861	9.52e-05	6.2e-05	7.31e-05	0.000262124	0.00032297	0.00027205	0.000464708	0.000373791	0.000352063	0.0002551	0.000142576	8.67768e-05	0.000341284	0.134427	0.558903	1.11109e-05	3.9329
Putrescine	0.00639162	0.0041621	0.00415018	0.00453545	0.00444394	0.0040922	0.00460095	0.00438166	0.00437344	0.00506466	0.00368261	0.0033711	0.00392525	0.00367617	0.00386076	0.00417907	0.00374995	0.00415873	0.00450068	0.00595699	0.00570298	0.00740876	0.00606371	0.0061218	0.00462925	0.00424573	0.00392499	0.00595915	0.403502	0.917154	0.000387212	1.51826
Pyridoxamine	1.26e-05	1.15e-05	1.08e-05	1.31e-05	1.01e-05	1.17e-05	1.71e-05	1.34e-05	1.28e-05	1.29e-05	1.32e-05	1.22e-05	1.4e-05	1.7e-05	1.75e-05	2.03e-05	1.62e-05	1.63e-05	1.53e-05	1.54e-05	1.8e-05	1.41e-05	1.68e-05	1.51e-05	1.16333e-05	1.36e-05	1.68833e-05	1.57833e-05	0.0433043	1.16905	0.303248	0.934847
Pyroglutamic acid	0.0848602	0.073856	0.0741767	0.0755173	0.0746771	0.0714967	0.0698739	0.0636781	0.0628501	0.0692079	0.0622892	0.0597297	0.0709381	0.0763029	0.0726488	0.0755164	0.07027	0.0721372	0.0788841	0.0867803	0.0884538	0.0889141	0.0838786	0.0844827	0.075764	0.0646048	0.0729689	0.0852323	0.0012744	0.852711	5.00183e-05	1.16806
Pyruvic acid	0.000711812	0.000681756	0.00071864	0.000573457	0.000740755	0.000635166	0.00070063	0.000639151	0.000482869	0.00049415	0.000673444	0.00060917	0.000353761	0.000385542	0.000514199	0.000575738	0.000482403	0.000504497	0.000519277	0.000600619	0.000624865	0.000598301	0.000545181	0.000716686	0.000676931	0.000599902	0.000469357	0.000600821	0.119897	0.886209	0.0141034	1.2801
Quinic acid	0.00510607	0.00427588	0.00497443	0.00442318	0.00664598	0.00639842	0.0117052	0.00702802	0.00631844	0.00735618	0.00870136	0.00597639	0.00922313	0.00883216	0.00741958	0.00484564	0.00354714	0.00137373	0.00157339	0.00135971	0.00170105	0.00153212	0.00102023	0.00157698	0.00530399	0.0078476	0.00587356	0.00146058	0.023721	1.47956	0.00633253	0.24867
Raffinose	5.76e-05	5.85e-05	4.55e-05	4.83e-05	2.75e-05	3.9e-05	4.8e-05	3.41e-05	5.03e-05	2.52e-05	7.02e-05	7.72e-05	4.22e-05	1.01e-05	5.14e-05	4.68e-05	2.55e-05	1.75e-05	8.23e-05	6.03e-05	7.24e-05	5.56e-05	7.22e-05	6.15e-05	4.60667e-05	5.08333e-05	3.225e-05	6.73833e-05	0.626433	1.10347	0.0013663	2.08941
Rhamnose	0.000821907	0.00074726	0.000723546	0.000727949	0.000754011	0.000745004	0.00088619	0.000850939	0.000890608	0.000882941	0.000873926	0.000859572	0.000793671	0.00089091	0.000847418	0.000797285	0.000794872	0.000771558	0.000858229	0.000828551	0.000910042	0.00090129	0.000948001	0.000868776	0.000753279	0.000874029	0.000815952	0.000885815	1.8527e-05	1.1603	0.0193206	1.08562
Ribonic acid	0.00229262	0.00156947	0.00172247	0.00185753	0.0016428	0.00160319	0.00176239	0.00175806	0.00176027	0.00243255	0.00164583	0.0018226	0.00172485	0.00173205	0.00177373	0.00162354	0.00158312	0.00168448	0.00191146	0.0018581	0.00195695	0.00241239	0.00197688	0.00201306	0.00178135	0.00186362	0.00168696	0.00202147	0.619055	1.04618	0.0030872	1.19829
Ribulose	0.000171901	0.000198673	0.000185119	0.000192433	0.000184227	0.000156701	0.000213908	0.000300047	0.000353008	0.000284975	0.000237078	0.000248995	0.000152492	0.00017159	0.000180809	0.000122179	0.000135825	0.000155878	0.000158115	0.000167242	0.000197506	0.000156972	0.000168921	0.000329265	0.000181509	0.000273002	0.000153129	0.000196337	0.00163839	1.50407	0.162658	1.28217
Salicylic acid	0.00017893	0.000163278	0.000174509	0.00018569	0.000163995	0.00016035	0.000163905	0.00023297	0.000224843	0.000264862	0.000213492	0.000212611	0.000231117	0.000153123	0.000208699	0.000193546	0.000188839	0.00020137	0.000160073	0.000183315	0.000185418	0.000211475	0.000211539	0.000204792	0.000171125	0.00021878	0.000196116	0.000192769	0.00696388	1.27848	0.807666	0.982934
Sarcosine	0.00306552	0.00181144	0.00109842	0.00269718	0.00198218	0.00183001	0.00102627	0.00128747	0.00131384	0.00078907	0.000679031	0.000856056	0.000541529	0.00148426	0.00215259	0.00165369	0.000980009	0.00114549	0.00179904	0.00208112	0.00141792	0.00254328	0.00278459	0.00288424	0.00208079	0.000991956	0.00132626	0.0022517	0.00519849	0.47672	0.0188563	1.69778
Serine	0.00222293	0.00224869	0.00224728	0.00206062	0.0019836	0.00217272	0.00137072	0.000938462	0.000658374	0.000524865	0.000911794	0.000832245	0.00166259	0.00213648	0.00202973	0.00205926	0.00179889	0.00169297	0.00300171	0.00436445	0.00393829	0.00403866	0.00397297	0.00395062	0.00215597	0.000872743	0.00189665	0.00387778	1.43262e-06	0.404802	2.13329e-06	2.04454
Shikimic acid	0.00786559	0.00700765	0.00712311	0.0074719	0.00742461	0.0068813	0.00968578	0.0103516	0.0098969	0.00943538	0.00911451	0.00976817	0.00861259	0.00925114	0.00903861	0.00891422	0.00835315	0.00929586	0.00850981	0.0085034	0.0088574	0.00912293	0.00909743	0.0091217	0.00729569	0.00970873	0.00891093	0.00886878	8.83117e-07	1.33075	0.831982	0.99527
Sorbose	0.0104274	0.0100374	0.0101861	0.010182	0.00966548	0.00991167	0.0125574	0.0136079	0.014746	0.0125119	0.0123711	0.0133965	0.00851058	0.0114806	0.0116354	0.00943035	0.0106552	0.0168263	0.012802	0.0113285	0.0134521	0.0130249	0.0128436	0.0123628	0.0100683	0.0131985	0.0114231	0.0126357	1.08956e-05	1.31089	0.345281	1.10615
Sphingosine	0.00031183	0.000329097	0.000267679	0.000265438	0.00038187	0.000220403	0.000371179	0.00045019	0.000515161	0.000629995	0.00030625	0.000319376	0.00034959	0.000259993	0.000284987	0.000272053	0.000353222	0.000493781	0.000308887	0.000305432	0.000276619	0.000441085	0.000280764	0.000502833	0.000296053	0.000432025	0.000335604	0.000352603	0.0361456	1.45928	0.753661	1.05065
Succinic acid	0.0045336	0.0044583	0.00437183	0.00438669	0.00404471	0.00408586	0.00369396	0.00424484	0.0042789	0.00490169	0.00406563	0.00404123	0.0041697	0.0034641	0.00397362	0.00365029	0.0034463	0.00353774	0.00349764	0.00356894	0.00396257	0.00361247	0.00386221	0.00368103	0.0043135	0.00420438	0.00370696	0.00369748	0.563735	0.974702	0.948097	0.997442
Sucrose	0.157508	0.133572	0.136334	0.148978	0.138136	0.131135	0.144724	0.16656	0.142541	0.148206	0.144557	0.146706	0.13863	0.130655	0.138695	0.135683	0.133699	0.139906	0.143409	0.152571	0.15084	0.155706	0.152647	0.154354	0.140944	0.148883	0.136211	0.151588	0.180596	1.05632	5.26192e-05	1.11289
Tartaric acid	0.000109065	8.04e-05	0.000101069	0.000109175	7.64e-05	9.86e-05	0.000135373	0.000104499	5.46e-05	0.000104702	8.78e-05	9.97e-05	7.7e-05	0.000107077	6.94e-05	6.96e-05	7.62e-05	6.21e-05	7.92e-05	8.14e-05	0.000100525	0.000119249	0.000107932	4.92e-05	9.57848e-05	9.7779e-05	7.68962e-05	8.95843e-05	0.873596	1.02082	0.318489	1.165
Tetradecanoic acid	8.96e-05	0.00048833	0.00082044	0.000860096	0.000571664	0.000591771	0.000638724	0.000100426	0.00068432	0.000323454	0.000786192	0.000839705	0.000106611	0.000789556	0.000812971	0.00048204	0.000925167	0.000107809	0.000620152	0.000795868	0.000635086	0.00091346	0.000725839	0.000882833	0.000570317	0.000562137	0.000537359	0.000762206	0.961108	0.985657	0.182563	1.41843
Threitol	0.0147231	0.013447	0.0137179	0.0146404	0.013923	0.0132299	0.0139926	0.0151644	0.0144675	0.0134422	0.0139183	0.0140733	0.0129743	0.012649	0.0133711	0.0133718	0.0130023	0.013728	0.0113452	0.0121759	0.0124009	0.0122837	0.0116916	0.0122844	0.0139469	0.0141764	0.0131827	0.0120303	0.523307	1.01645	0.000546037	0.912579
Threonic acid	0.000416908	0.000404446	0.000397787	0.000412478	0.000393657	0.00040852	0.000455666	0.000441661	0.000395558	0.00040894	0.000427386	0.00045284	0.000329386	0.000342578	0.000352211	0.000317854	0.000329117	0.000317793	0.000408172	0.000404935	0.000447986	0.000395108	0.000432201	0.000409362	0.000405633	0.000430342	0.00033149	0.000416294	0.0412392	1.06092	5.91825e-06	1.25583
Threonine	0.000824803	0.000609922	0.000604259	0.000613372	0.000554425	0.000590849	0.000503939	0.000428204	0.00034633	0.000346868	0.000365762	0.000359412	0.000431709	0.000548392	0.000578958	0.000555847	0.000516916	0.000483426	0.000713666	0.00101319	0.000851865	0.00107936	0.000923331	0.00103869	0.000632938	0.000391752	0.000519208	0.000936685	0.000441308	0.618943	3.97554e-05	1.80406
Tyramine	0.0040446	0.0030983	0.00300308	0.0034001	0.00304887	0.00338287	0.00341632	0.00323057	0.00336816	0.00357291	0.00284832	0.00265817	0.00328427	0.00314044	0.00337691	0.00347728	0.00329086	0.00333023	0.00288473	0.00358232	0.00348594	0.00377918	0.00338067	0.00378019	0.00332964	0.00318241	0.00331666	0.00348217	0.509289	0.955782	0.275192	1.0499
Tyrosine	0.000255985	0.000289153	0.000294388	0.000343213	0.000307941	0.000310204	0.000223362	1.84e-05	0.00016355	7.23e-05	0.000211734	8.05e-05	1.67e-05	0.0002009	0.000118707	0.000238103	0.000120435	4.67e-05	0.000511828	0.000754075	0.000760383	0.000618642	0.000790855	0.000703308	0.000300147	0.000128308	0.000123591	0.000689849	0.000751895	0.427482	1.34172e-06	5.58171
Valeric acid	0.0013779	0.000981253	0.000947822	0.000992079	0.00102359	0.000911741	0.00113124	0.000962176	0.00118235	0.00117595	0.000906192	0.000783107	0.000791027	0.00088725	0.000704432	0.000963431	0.00074686	0.000887066	0.000937956	0.00113945	0.0010841	0.00133829	0.00117107	0.00129232	0.00103906	0.0010235	0.000830011	0.00116053	0.87535	0.985023	0.00094832	1.39821
Valine	0.000979174	0.000995536	0.00104898	0.00107017	0.00125936	0.00116159	0.000754563	0.000728879	0.000643553	0.000448702	0.000705443	0.000691613	0.000876019	0.000938536	0.000810008	0.00106275	0.000727291	0.000954249	0.00109773	0.00193965	0.00192387	0.00189296	0.001998	0.00205468	0.0010858	0.000662126	0.000894808	0.00181782	5.12016e-05	0.609803	0.000130723	2.03151
Viburnitol	0.0046323	0.00479152	0.00481685	0.00485812	0.00439734	0.0047721	0.00584103	0.00652002	0.00658651	0.00523349	0.00599581	0.00697348	0.00525794	0.00466723	0.00522196	0.00546322	0.00473548	0.00815347	0.00584692	0.00549798	0.00601818	0.00574185	0.00612374	0.00629861	0.00471137	0.00619172	0.00558322	0.00592121	0.00023006	1.31421	0.547101	1.06054
Xylulose	0.00126358	0.00128252	0.00129589	0.00139757	0.00129581	0.00127134	0.00158146	0.000956073	0.000981398	0.000979777	0.00141895	0.0012972	0.00153817	0.00191972	0.0016869	0.00160228	0.00155742	0.00176876	0.00190018	0.00177596	0.00209218	0.0017807	0.00228344	0.00134978	0.00130112	0.00120248	0.00167888	0.00186371	0.395678	0.924186	0.225774	1.11009

## Sheet: Table S2
Table S2. List of metabolites present in both New moon (NM)-5hr and Dark-5h exposed plants of Nicotiana tabacum
Sample	NM-1	NM-2	NM-3	NM-4	NM-5	NM-6	Dark-1	Dark-2	Dark-3	Dark-4	Dark-5	Dark-6	Avg NM	Avg Dark	FC (NM/Dark)	p-value (NM/D)
4-Hydroxyphenyl-beta-glucopyranoside	0.00016339	0.000129336	8.87e-05	8.87e-05	0.000110435	0.00014396	0.000148902	0.000136871	0.000130966	0.000103749	0.000129029	6.32e-05	0.000120753	0.000118786	1.01656	0.913679
6-deoxy-Mannopyranose	5.66e-05	5.4e-05	5.13e-05	5.69e-05	6.07e-05	6.04e-05	6.06e-05	6.87e-05	5.67e-05	5.3e-05	5.31e-05	5.67e-05	5.665e-05	5.81333e-05	0.974484	0.611187
Adenosine	4.26e-05	4.69e-05	4.98e-05	6.35e-05	6.11e-05	5.15e-05	4.98e-05	7.96e-05	4.59e-05	4.88e-05	6.25e-05	6.12e-05	5.25667e-05	5.79667e-05	0.906843	0.399167
Alanine	0.000634537	0.000620232	0.000610455	0.000587757	0.000626463	0.000687498	0.000456122	0.000673831	0.000637002	0.000761051	0.000707555	0.000760192	0.000627824	0.000665959	0.942736	0.448644
Anthranilic acid	3.21e-06	3.57e-06	2.86e-06	3.05e-06	3.23e-06	2.66e-06	3.91e-06	3.57e-06	3.64e-06	2.38e-06	3.76e-06	3.3e-06	3.09667e-06	3.42667e-06	0.903696	0.232874
Arabinose	0.000124962	0.000128225	0.000124834	0.000135088	0.000149534	0.000132287	0.000124935	0.000134798	0.000127413	0.000130599	0.000126795	0.000126852	0.000132488	0.000128565	1.33051	0.356616
Ascorbic acid	0.0049938	0.00505041	0.00496724	0.0050275	0.00495509	0.00498479	0.0049447	0.00497773	0.00495201	0.00504371	0.00495035	0.00497626	0.00499647	0.00497413	1.00449	0.314634
Aspartic acid	0.00133766	0.00136518	0.00135416	0.00134673	0.00136604	0.00136361	0.00138291	0.00134611	0.00132805	0.00135769	0.00139247	0.00136405	0.00135557	0.00136188	0.995362	0.569536
Benzene-1,2,4-triol	2.21e-05	2.77e-05	2.72e-05	2.87e-05	2.19e-05	2.98e-05	2.05e-05	2.21e-05	2.85e-05	2.92e-05	2.79e-05	2.74e-05	2.62333e-05	2.59333e-05	1.01157	0.886188
Benzoic acid	0.000152379	0.00028353	0.00030465	0.000355217	0.000365032	0.000384037	0.000220618	0.000304925	0.000332511	0.000391611	0.000364684	0.000373937	0.000307474	0.000331381	0.927857	0.590904
Benzoic acid	7.11e-05	0.000109896	0.000109057	0.000120925	0.000122725	0.000126521	8.87e-05	0.000113016	0.000117356	0.000133693	0.000122284	0.000124361	0.000110037	0.000116568	0.943973	0.544094
beta-D-Allose	0.00158776	0.0014965	0.00138456	0.00125211	0.00137191	0.00114894	0.0013288	0.00143487	0.00132616	0.00150854	0.00131341	0.00121833	0.00137363	0.00135502	1.01373	0.814069
beta-D-Fructofuranosyl-(2,1)-beta-D-Fructofuranose	8.74e-05	8.96e-05	6.02e-05	8.39e-05	7.29e-05	8.49e-05	0.000123642	3.99e-05	6.77e-05	4.99e-05	7.91e-05	4.95e-05	7.98167e-05	6.82903e-05	1.16878	0.406452
beta-Galactopyranosyl-1,3-arabinose	0.000364077	0.000291732	0.000247221	0.000282415	0.000249589	0.00027835	0.000377771	0.000219981	0.000222463	0.000242652	0.000207305	0.00020789	0.000285564	0.000246344	1.15921	0.247434
Boric-acid	0.000389565	0.000412655	0.000414717	0.000329382	0.000505612	0.000370693	0.000430322	0.000410263	0.000531491	0.000544606	0.000370217	0.000510691	0.000403771	0.000466265	0.865968	0.131472
Caffeic acid	3.41e-05	3.77e-05	4.61e-05	5.92e-05	4.02e-05	5.07e-05	2.61e-05	5e-05	5.34e-05	4.55e-05	3.95e-05	4.26e-05	4.46667e-05	4.285e-05	1.0424	0.745771
Caffeic acid	0.000546257	0.000795932	0.000851175	0.000895081	0.000952087	0.000864851	0.000936239	0.000840592	0.000744754	0.000826077	0.000738491	0.000898677	0.000817564	0.000830805	0.984062	0.846531
Catechin	8.67e-07	1.29e-07	2.4e-07	1.58e-07	7.02e-08	2.96e-07	1.05e-07	1.79e-07	2.89e-07	2.58e-07	2.78e-07	5.96e-07	2.93367e-07	2.84167e-07	1.03238	0.948019
Cellobiitol	0.000181579	0.000171684	0.000166085	0.000198118	0.000189931	0.000182631	0.000182748	0.000198519	0.000184224	0.000178512	0.000187223	0.000186314	0.000181671	0.000186257	0.975382	0.424547
Cellobiose	8.64e-05	7.04e-05	5.01e-05	8.69e-05	7.65e-05	7.68e-05	0.000123642	4.19e-05	6.77e-05	4.99e-05	8.01e-05	4.95e-05	7.45167e-05	6.87903e-05	1.78324	0.681487
Cinnamic acid	0.0020974	0.00203035	0.00191206	0.00195927	0.00205479	0.00190745	0.00205997	0.00206603	0.00191591	0.00194405	0.00193545	0.00208352	0.00199355	0.00200082	0.996368	0.874591
Citric acid	0.00235205	0.00223018	0.00207405	0.00189615	0.00205507	0.00170977	0.00286546	0.0020412	0.00182226	0.00277247	0.00163233	0.00292299	0.00205288	0.00234279	0.876255	0.279055
Dehydroascorbic acid	2.43e-05	3.57e-05	4.35e-05	3.08e-05	3.68e-05	2.69e-05	4.96e-05	3.15e-05	2.39e-05	4.55e-05	5.1e-05	2.08e-05	3.3e-05	3.705e-05	0.890688	0.526194
Erythrose	0.00348341	0.00310925	0.00293676	0.00309656	0.0033671	0.00317756	0.00373979	0.00380631	0.00407364	0.00124307	0.00378873	0.00414436	0.00319511	0.00346598	0.921847	0.566434
Dihydrosphingosine	2.46e-05	2.21e-05	2.6e-05	2.96e-05	2.59e-05	2.08e-05	2.26e-05	3.59e-05	3e-05	2.64e-05	2.5e-05	3.68e-05	2.48333e-05	2.945e-05	0.843237	0.119762
Dodecanoic acid	2.61e-05	2.52e-05	2.15e-05	2.21e-05	2.32e-05	1.13e-05	2.47e-05	2.05e-05	2.74e-05	2.27e-05	2.35e-05	2.45e-05	2.15667e-05	2.38833e-05	0.903001	0.351398
Erythritol	0.000630771	0.000598636	0.000553585	0.000562418	0.000584468	0.000543605	0.000586334	0.000593126	0.000592393	0.000633191	0.000540886	0.000593557	0.000578914	0.000589915	0.981352	0.552087
Fructose	0.000847328	0.000930134	0.000849583	0.000808941	0.000943844	0.000862253	0.000872406	0.000867114	0.000872406	0.000959182	0.000815265	0.000932119	0.000873681	0.000886415	0.985633	0.679738
Fumaric acid	0.00189156	0.0011974	0.00109848	0.00142424	0.00125232	0.00130063	0.00131298	0.00143393	0.00123363	0.00149048	0.00128962	0.00181377	0.00136077	0.00142907	0.952208	0.644808
Fucose	0.000524116	0.000530133	0.000525999	0.000531319	0.000539522	0.000526069	0.000526494	0.000523376	0.000528028	0.000535657	0.000525464	0.000528126	0.000529526	0.000527858	1.00316	0.572767
Galactonic acid	0.000285154	0.000307225	0.000281468	0.000317767	0.000350003	0.000274668	0.000340692	0.000302478	0.000400922	0.000337922	0.000398986	0.000416427	0.000302714	0.000366238	0.826551	0.0156948
Gentiobiose	0.000292502	0.000256215	0.000243653	0.000256351	0.000282793	0.000257062	0.000216808	0.000240729	0.000292862	0.000263461	0.000242361	0.000242845	0.000264763	0.000249844	2.05971	0.277358
Galactose	0.00243223	0.00198459	0.00184804	0.00193947	0.00200342	0.00192629	0.00132946	0.00260606	0.00153593	0.00289211	0.00137835	0.00243621	0.00202234	0.00202969	0.996379	0.980635
Gallic acid	5.09e-05	5.44e-05	5.12e-05	5.19e-05	5.05e-05	4.9e-05	4.98e-05	5.06e-05	4.67e-05	5.13e-05	5.13e-05	4.81e-05	5.13167e-05	4.96333e-05	1.03392	0.142473
Gluconic acid	0.000285154	0.000298933	0.000281468	0.000317767	0.000295615	0.000274668	0.000340692	0.00024966	0.000400922	0.000337922	0.000363204	0.000416427	0.000292267	0.000351471	0.831555	0.0389793
Glucosamine	4.97e-06	5.26e-06	5.07e-06	5.86e-06	5.98e-06	6.26e-06	6.25e-06	5.11e-06	6.34e-06	7.22e-06	7.24e-06	5.51e-06	5.56667e-06	6.27833e-06	0.886647	0.118359
Glucose	0.00122198	0.00194217	0.0017915	0.00189544	0.0020356	0.00189272	0.00117506	0.00146003	0.00145996	0.00184812	0.00148522	0.00142496	0.00179657	0.00147556	1.21755	0.0556723
Glucose, 1,6-anhydro	0.000114009	0.00011938	0.000122967	0.00013341	0.000129134	0.000114841	0.000116631	0.000126893	0.000136891	0.000146112	0.000137462	0.000133103	0.00012229	0.000132849	0.920522	0.0703862
Glucose-6-phosphate	0.00012796	0.000107184	0.000118453	0.000122654	0.000137646	9e-05	0.000148905	0.000120636	0.000146871	0.000107345	0.000156144	0.000128079	0.000117316	0.000134663	0.871181	0.124206
Glutamic acid	0.000114967	0.000117503	0.000116796	0.000116042	0.000117272	0.000124031	0.000112937	0.000141697	0.000122173	0.000138955	0.00012677	0.000146374	0.000117768	0.000131484	0.895685	0.0301906
Glutaric acid, 2-hydroxy	1.26e-05	1.06e-05	1.22e-05	1.16e-05	1.22e-05	1.03e-05	1.29e-05	1.42e-05	1.11e-05	1.29e-05	1.01e-05	1.31e-05	1.15833e-05	1.23833e-05	0.935397	0.293467
Glutaric acid, 3-hydroxy-3-methyl	5.41e-06	4.63e-06	4.43e-06	4.58e-06	4.97e-06	3.89e-06	4.34e-06	4e-06	4.33e-06	4.27e-06	3.58e-06	4.4e-06	4.65167e-06	4.15333e-06	1.11998	0.0695518
Glycine	0.000228866	0.000239752	0.000230986	0.000256326	0.000204927	0.000252847	0.000250893	0.000231899	0.000225102	0.000233277	0.000248857	0.000209448	0.000235617	0.000233246	1.01017	0.815566
Gulonic acid	1.35e-05	1.53e-05	1.47e-05	1.55e-05	1.62e-05	1.34e-05	1.5e-05	1.04e-05	1.38e-05	1.41e-05	1.44e-05	1.21e-05	1.47667e-05	1.33e-05	1.11028	0.111582
Hexadecanoic acid	0.000930178	0.00084972	0.00088909	0.00101374	0.000726823	0.00112205	0.000759619	0.000836606	0.000834893	0.000774307	0.000830509	0.000816645	0.000921934	0.000808763	1.13993	0.0765014
Inositol	0.0043454	0.00426695	0.00409827	0.0041653	0.00434766	0.00407243	0.00487911	0.00490652	0.00413284	0.00431544	0.00486288	0.00444688	0.004216	0.00459061	0.918396	0.0278329
Inositol-2-phosphate	1.21e-05	1.17e-05	1.16e-05	1.23e-05	1.53e-05	9.48e-06	1.61e-05	9.84e-06	1.7e-05	1.28e-05	1.42e-05	1.55e-05	1.208e-05	1.424e-05	0.848315	0.130754
Isoleucine	0.000165005	0.000132631	0.000129729	0.000121441	0.000150963	0.000126426	0.000127334	0.000181073	0.000157927	0.000132029	0.000138906	0.000107054	0.000137699	0.000140721	0.97853	0.814482
Isomaltose	2.34e-05	1.88e-05	2.22e-05	2.03e-05	2.05e-05	1.7e-05	1.83e-05	2.59e-05	2.39e-05	2.04e-05	1.02e-05	2.72e-05	2.03667e-05	2.09833e-05	0.970612	0.825046
Lactic acid	8.74e-05	8.61e-05	5.8e-05	8.2e-05	7.29e-05	8.49e-05	0.000123642	3.99e-05	6.77e-05	4.99e-05	8.01e-05	4.95e-05	7.855e-05	6.8457e-05	1.14744	0.466899
Lactose	8.74e-05	8.5e-05	6.02e-05	8e-05	7.29e-05	8.49e-05	0.000123642	3.99e-05	6.77e-05	4.99e-05	8.33e-05	4.95e-05	7.84e-05	6.89903e-05	1.13639	0.495733
Lyxonic acid	4.42e-05	4.88e-05	3.74e-05	4.05e-05	4e-05	3.76e-05	4.2e-05	4.07e-05	3.9e-05	4.97e-05	3.19e-05	4.41e-05	4.14167e-05	4.12333e-05	1.00445	0.952359
Lyxose	0.000131137	0.000130065	0.000122136	0.000132915	0.000149534	0.000131813	0.000137914	0.00012139	0.000138545	0.000138676	0.000129619	0.000121272	0.000132933	0.000131236	1.01293	0.742443
Laminaribiose	0.000229663	0.000225669	0.000204399	0.000212332	0.000239838	0.000185581	0.000244461	0.000249317	0.000219914	0.000266479	0.000283671	0.000276117	0.000216247	0.00025666	0.842543	0.00893024
Malic acid	0.000198744	0.000138676	0.000159	0.000133835	0.000136043	0.000122812	0.000108919	0.000143493	0.000225318	0.000161903	0.000172105	0.000116839	0.000148185	0.000154763	0.957497	0.756305
Mannopyranoside	0.000249607	0.0001954	0.000181018	0.000256916	0.000214834	0.000223462	0.000326083	0.000199784	0.000253704	0.000174099	0.000209738	0.000197742	0.000220206	0.000226858	0.970677	0.800079
Maltose	0.000655515	0.000663428	0.000620154	0.000650385	0.000691347	0.000570445	0.000626021	0.000654007	0.000644569	0.000613799	0.000533386	0.000606631	0.000641879	0.000613069	1.04699	0.266415
Mannitol	8.85e-05	8.3e-05	8.63e-05	8.38e-05	9.46e-05	8.58e-05	8.21e-05	8.99e-05	8.12e-05	8.67e-05	8.38e-05	8.62e-05	8.7e-05	8.49833e-05	1.02373	0.373857
Mannosamine	0.000624321	0.000660992	0.000587483	0.000629062	0.000681499	0.000662139	0.000648192	0.000582815	0.000677807	0.000798627	0.000670361	0.000613267	0.000640916	0.000665178	0.963525	0.484665
Mannose-6-phosphate	0.000256245	0.000223299	0.000210317	0.000199912	0.000252817	0.000164043	0.000234158	0.00021074	0.000219145	0.000245425	0.000163329	0.000279316	0.000217772	0.000225352	0.966364	0.728195
Nicotinic acid	3.96e-05	3.17e-05	2.84e-05	3.13e-05	4.45e-05	2.54e-05	2.84e-05	3.27e-05	3.86e-05	3.28e-05	2.75e-05	3.13e-05	3.34833e-05	3.18833e-05	1.05018	0.642971
Octadecanoic acid	0.000864679	0.000795094	0.000830326	0.000971602	0.000668518	0.00111266	0.000726815	0.000725775	0.000804036	0.00072503	0.000822464	0.000774656	0.000873813	0.000763129	1.14504	0.119
Octadecenoic acid	0.000355153	0.00033919	0.00035966	0.000422818	0.00028986	0.0004807	0.000305879	0.000308199	0.000357121	0.000307108	0.000345272	0.00032689	0.000374564	0.000325078	1.15223	0.117469
Ornithine	7.12e-07	3.73e-07	3.23e-07	9.84e-07	4.67e-07	7.51e-07	5.8e-07	3.55e-07	7.23e-07	6.65e-07	7.75e-07	3.01e-07	6.01667e-07	5.665e-07	1.06208	0.795158
Pantothenic acid	1.61e-06	1.11e-06	2e-06	1.12e-06	1.24e-06	2.41e-06	1.55e-06	1.35e-06	1.46e-06	1.63e-06	1.58e-06	1.36e-06	1.58167e-06	1.48833e-06	1.06271	0.683516
Phenylalanine	8.23e-05	8.41e-05	9.58e-05	5.58e-05	9.64e-05	7.57e-05	8.93e-05	0.000100679	8.67e-05	0.000115225	5.99e-05	0.000118383	8.16833e-05	9.50312e-05	0.859543	0.24158
Phenol	1.54e-05	1.74e-05	2.71e-05	2.24e-05	2.42e-05	1.57e-05	1.37e-05	2.76e-05	2.27e-05	1.41e-05	2.54e-05	1.29e-05	2.03667e-05	1.94e-05	1.74983	0.778717
Proline	1.38e-05	1.41e-05	1.35e-05	1.35e-05	1.47e-05	1.47e-05	1.31e-05	1.6e-05	1.46e-05	1.63e-05	1.42e-05	1.68e-05	1.405e-05	1.51667e-05	0.926374	0.103898
Pyruvic acid	0.00393996	0.00306548	0.00323407	0.0041131	0.00365893	0.00313965	0.00465491	0.00370552	0.00328543	0.00411754	0.00326558	0.00359309	0.0035252	0.00377034	0.93498	0.407243
Pyridine, 4-hydroxy	0.00013729	0.00013032	0.000140571	0.000137891	0.000142355	0.000129207	0.000169935	0.000139003	0.000149781	0.00015784	0.000144382	0.000138566	0.000136272	0.000149918	0.90898	0.0309082
Sarcosine	0.00366926	0.00331546	0.00298777	0.00457185	0.00357276	0.00376772	0.00456314	0.00294689	0.00512186	0.00454394	0.00528017	0.00395862	0.00364747	0.00440244	0.828512	0.0961474
Pyroglutamic acid	0.00283781	0.00318626	0.003163	0.00343737	0.0032176	0.00289487	0.00207243	0.00381775	0.00301637	0.00362307	0.00297954	0.00319884	0.00312282	0.003118	1.00155	0.985899
Quinic acid	0.0047548	0.00454058	0.00436578	0.00456211	0.00465509	0.00451184	0.00499888	0.00451755	0.00461923	0.0043491	0.00450251	0.00451058	0.00456504	0.00458298	0.996085	0.868023
Quinic acid, 3-caffeoyl	0.000233896	0.000182125	0.000181392	0.000255553	0.000123439	0.000274363	0.000207336	0.000251602	0.000179725	0.000110276	0.000114641	0.000249127	0.000208461	0.000185451	1.12408	0.518527
Shikimic acid	0.00302173	0.003281	0.00315845	0.00312004	0.0034107	0.00257746	0.0032315	0.00343371	0.00396797	0.00387002	0.00379596	0.00258143	0.0030949	0.0034801	0.889313	0.144214
Quinic acid	0.000107061	0.000117216	0.000116234	0.000163863	0.000153	0.000121258	0.000103649	0.000169436	0.000180106	0.000116246	0.000171923	0.000110083	0.000129772	0.000141907	0.914485	0.496789
Sphingosine	0.000463537	0.000453836	0.000479525	0.000385704	0.000452659	0.000361772	0.000472699	0.000433167	0.000448385	0.000349399	0.000402244	0.000304471	0.000432839	0.000401728	1.07744	0.360565
Raffinose	1.07e-06	1.06e-06	2.19e-06	1.62e-06	1.57e-06	2.94e-06	2.8e-06	1.77e-07	2.66e-06	1.86e-06	1.92e-06	1.45e-06	1.74167e-06	1.81117e-06	0.961627	0.889319
Valine	0.000525122	0.000530673	0.000525683	0.000534758	0.000539234	0.000525257	0.000528255	0.000513708	0.000518897	0.000530062	0.000536962	0.000540288	0.000530121	0.000528029	1.00396	0.673188
Rhamnose	0.000525122	0.000530673	0.000526257	0.000534758	0.000539234	0.000525257	0.000528255	0.000523708	0.000528897	0.000520062	0.000536962	0.000520288	0.000530217	0.000526362	1.00732	0.300769
Ribitol	0.00264038	0.00273317	0.00263562	0.00267849	0.00268352	0.00269253	0.00274431	0.00265925	0.00269702	0.00271491	0.00272494	0.00268701	0.00267729	0.00270457	0.989912	0.184927
Ribonic acids	0.000854377	0.000921812	0.000929459	0.00099251	0.000977123	0.000917099	7.45e-05	0.00116366	0.00108413	0.0012666	0.00116333	0.00120962	0.000932063	0.000993641	0.938028	0.748134
Salicin	0.000364077	0.000291732	0.000247221	0.000277083	0.000249589	0.00027835	0.000377771	0.000219981	0.000222463	0.000242652	0.000207305	0.00020789	0.000284675	0.000246344	1.1556	0.258014
Salicylic acid	6.32e-06	8.8e-06	1.12e-05	1.26e-05	1.29e-05	1.39e-05	5.24e-06	9.19e-06	1.13e-05	1.22e-05	1.31e-05	1.55e-05	1.09533e-05	1.10883e-05	0.987825	0.943614
Serine	1.81e-05	2.19e-05	2.45e-05	1.44e-05	2.22e-05	2.18e-05	1.28e-05	1.37e-05	1.61e-05	2.42e-05	3.81e-05	1.16e-05	2.04833e-05	1.94167e-05	1.05494	0.814166
Siloxane	7.37e-06	9.14e-06	7.75e-06	4.99e-06	8.66e-06	1.19e-06	7.93e-06	5.69e-06	9.31e-06	8.73e-06	7.8e-06	1.04e-05	6.51667e-06	8.31e-06	0.784196	0.22334
Sorbitol	0.005	0.005	0.005	0.005	0.005	0.005	0.005	0.005	0.005	0.005	0.005	0.005	0.005	0.005	1	#DIV/0!
Sorbose	0.00188795	0.0011974	0.00109848	0.00142424	0.00125232	0.00130063	0.001317	0.00134058	0.00123363	0.00151076	0.00128962	0.00181377	0.00136017	0.00141756	0.959513	0.699191
Sucrose	0.0118392	0.0119578	0.0117651	0.0117119	0.0120554	0.0115781	0.0136105	0.0114092	0.0118202	0.0119287	0.0112152	0.0117931	0.0118179	0.0119628	0.987888	0.691677
Xylitol	0.000444167	0.000432868	0.000432195	0.000530248	0.000388871	0.000540261	0.000553659	0.000456209	0.000578572	0.000580487	0.000598237	0.000476978	0.000461435	0.00054069	0.853418	0.044878

## Sheet: Table S3
Table S3. List of All proteins present in both Full moonlight (FML)-5h and Dark-5h (D) exposed plants of Nicotiana tabacum
Protein IDs	Protein names	Gene names	Sequence coverage [%]	Razor + unique peptides	Mol. weight [kDa]	Only identified by site	Potential contaminant	FML-1	FML-2	FML-3	avg FML	Dark-1	Dark-2	Dark-3	avg Dark	FC
CON__Q9U6Y5			44.2	7	28.106		+	207460000	175950000	166910000	183440000	182810000	164210000	167510000	171510000	1.06956
A0A1S4CPI7;A0A1S4AGR1	1-(5-phosphoribosyl)-5-[(5-phosphoribosylamino)methylideneamino] imidazole-4-carboxamide isomerase, chloroplastic	LOC107821260	9.8	3	34.371			44921000	45355000	32623000	4.09663e+07	37772000	51131000	36339000	4.17473e+07	0.981292
A0A1S4A5S7;A0A1S4DCR3	1,2-dihydroxy-3-keto-5-methylthiopentene dioxygenase	LOC107794012	54.5	9	23.494			226130000	259420000	231950000	2.39167e+08	269170000	239880000	266190000	2.58413e+08	0.92552
A0A1S4C7I2;A0A1S4A5L0	1,2-dihydroxy-3-keto-5-methylthiopentene dioxygenase	LOC107815917	18.2	3	22.305			120440000	112370000	135410000	122740000	109500000	103290000	116400000	109730000	1.11856
A0A1S3X1Q4;A0A1S4D3V9;A0A1S3ZN86;A0A1S3YMJ1;A0A1S4BB16	1,3-beta-glucan synthase; callose synthase 9-like	LOC107760121;LOC107825657	1.4	2	219.1			0	0	0	0	41722000	26218000	26228000	3.13893e+07	0
A0A1S3YR94;A0A1S4C1F1;A0A1S4B271	1,4-alpha-glucan-branching enzyme 1, chloroplastic/amyloplastic-like isoform X1	LOC107778845	11.7	7	85.203			84727000	72370000	66399000	7.44987e+07	62221000	73696000	67223000	6.77133e+07	1.10021
A0A1S4D8U3	1,4-alpha-glucan-branching enzyme 2-2, chloroplastic/amyloplastic	LOC107827216	12.6	1	58.822			0	16127000	19701000	1.19427e+07	0	12614000	0	4.20467e+06	2.84034
A0A1S3XMZ5	1,4-dihydroxy-2-naphthoyl-CoA synthase, peroxisomal-like	LOC107766707	11.3	3	37.629			47421000	54605000	56405000	5.28103e+07	44354000	40277000	54023000	46218000	1.14264
A0A1S4B4Q4;A0A1S3X3I0	10 kDa chaperonin-like	LOC107804443;LOC107760854	56.7	6	10.444			537360000	504720000	511590000	517890000	643150000	516240000	566890000	5.75427e+08	0.90001
A0A1S3YF58;A0A1S4AH01	10 kDa chaperonin-like isoform X1; 10 kDa chaperonin-like	LOC107775642;LOC107797596	52.6	8	14.786			1563500000	1497000000	1801600000	1620700000	1730000000	1560100000	1564700000	1.61827e+09	1.0015
A0A1S3Y739	12-oxophytodienoate reductase 3	LOC107773112	33.6	10	43.73			287400000	275000000	276810000	2.79737e+08	302970000	294970000	286690000	2.94877e+08	0.948657
A0A1S3Z4R9	12-oxophytodienoate reductase 3-like	LOC107782790	32.7	4	43.535			30702000	36441000	30719000	3.26207e+07	36429000	36872000	41430000	3.82437e+07	0.852969
A0A1S3Z0S4	14 kDa proline-rich protein DC2.15-like	LOC107781812	32.6	5	13.104			1673000000	1902100000	1792000000	1.78903e+09	2228100000	2099200000	1908900000	2.07873e+09	0.860636
A0A1S4BWJ2	14 kDa proline-rich protein DC2.15-like	LOC107812631	14.2	1	14.284			109260000	111200000	81264000	1.00575e+08	0	145140000	199670000	1.14937e+08	0.875044
A0A1S4BG88	14 kDa proline-rich protein DC2.15-like	LOC107807939	32.6	2	13.147			0	0	0	0	72515000	0	58326000	4.36137e+07	0
A0A1S3Y9P0	14 kDa zinc-binding protein-like	LOC107773830	37.7	3	14.321			233170000	192700000	213170000	2.13013e+08	229480000	198160000	223600000	217080000	0.981267
A0A1S4BS33;A0A1S4BVU4	14 kDa zinc-binding protein-like	LOC107811311;LOC107812415	33.5	5	19.544			122750000	157790000	138050000	139530000	189370000	165270000	159170000	171270000	0.814679
A0A1S4AQ32	14 kDa zinc-binding protein-like	LOC107800041	31	1	17.591			64383000	66358000	97323000	7.60213e+07	72921000	69462000	62172000	68185000	1.11493
Q75ZE5	14-3-3 a-1 protein	14-3-3	73.7	19	28.765			6681800000	6397100000	6359400000	6.47943e+09	6953100000	7000400000	6460600000	6804700000	0.9522
Q948K4;Q5KTN6;O49995	14-3-3 b-2 protein; 14-3-3 b-1 protein; 14-3-3-like protein B	D31;14-3-3	73.3	11	28.797			532600000	584620000	602250000	5.73157e+08	599180000	497750000	634190000	577040000	0.99327
Q75ZE3;Q5KTN5;P93343	14-3-3 c-2 protein; 14-3-3 c-1 protein; 14-3-3-like protein C	14-3-3	61.5	10	29.38			2203600000	2034800000	2010100000	2.08283e+09	2468200000	2333500000	2279200000	2360300000	0.882444
Q5KTN4;O49996	14-3-3 d-1 protein; 14-3-3-like protein D	14-3-3	69.1	13	28.257			1190600000	1119800000	1147200000	1.15253e+09	1394800000	1212800000	1295100000	1300900000	0.885951
Q75ZE0;Q75ZD9;O49997;A0A1S4DHA0	14-3-3 e-1 protein; 14-3-3 e-2 protein; 14-3-3-like protein E	14-3-3	45.8	4	29.383			203920000	119400000	222700000	1.82007e+08	216400000	205060000	205430000	2.08963e+08	0.870998
Q947K7	14-3-3 g-1 protein	LOC107802962	73	9	28.582			585830000	560530000	622780000	5.89713e+08	624830000	471530000	569880000	5.55413e+08	1.06176
Q75ZD6	14-3-3 h-1 protein	14-3-3	74	8	29.025			1646200000	1444300000	1595200000	1561900000	1618000000	1636100000	1646500000	1.63353e+09	0.956148
Q75ZD4	14-3-3 i-1 protein	14-3-3	56.5	2	29.386			281990000	299750000	355010000	312250000	370670000	352700000	248420000	323930000	0.963943
Q75ZD3	14-3-3 i-2 protein	14-3-3	65.4	9	29.472			706530000	750640000	762990000	7.40053e+08	812530000	772110000	794180000	792940000	0.933303
Q948K3;A0A1S4B8I4;A0A1S3Y0Y7;A0A1S3XV22	14-3-3 protein	D75	55.9	13	29.479			1953300000	2211200000	2267900000	2.14413e+09	1931700000	1852500000	2097100000	1.96043e+09	1.0937
A0A1S4CRT5	14-3-3 protein 9	LOC107821878	55.9	1	29.493	+		0	13015000	0	4.33833e+06	0	0	0	0	#DIV/0!
A0A1S4CMF0	14-3-3 protein 9-like isoform X1	LOC107820598	41.1	5	29.427			160820000	153670000	158710000	1.57733e+08	141800000	143840000	149980000	1.45207e+08	1.08627
A0A1S3WXW9;A0A1S3XRG3	14-3-3 protein 9-like isoform X1	LOC107759102	39.7	1	27.833			0	0	9634900	3.21163e+06	0	0	0	0	#DIV/0!
A0A1S4A416;A0A1S3XUI1	14-3-3 protein 9-like; 14-3-3 protein 9-like isoform X1	LOC107793523;LOC107768942	48.3	2	29.486			65605000	62119000	75164000	6.76293e+07	76605000	88110000	74722000	7.98123e+07	0.847354
A0A1S4A7P5;P93342	14-3-3-like protein A	LOC107794654	67.1	2	28.679			164200000	217010000	265310000	2.15507e+08	231180000	216310000	228410000	225300000	0.956532
A0A1S4BTV4	14-3-3-like protein D	LOC107811808	65.1	1	28.245			92887000	79347000	95175000	8.91363e+07	84976000	92872000	84696000	8.75147e+07	1.01853
Q41246;A0A1S3Z976;A0A1S4D0C1	14-3-3-like protein; 14-3-3 protein 7; 14-3-3 protein 7-like	LOC107784347	23.9	2	28.667			47779000	45250000	53805000	4.89447e+07	46137000	53107000	53051000	50765000	0.964142
A0A1S4D1V8;A0A1S3ZYK0	15 kDa selenoprotein-like	LOC107825049;LOC107791754	10.9	1	17.752			0	0	0	0	0	0	0	0	#DIV/0!
A0A1S3ZFP2;A0A068LMB8;Q53E26;A0A1S3ZJV3;A0A1S4C6H6;A0A1S3Z7Q2;A0A1S3YWZ3;A0A1S3ZJU1;A0A1S3ZTK6;A0A1S3ZJF1;A0A1S3ZBZ1;A0A068LKK5	17.6 kDa class I heat shock protein-like	LOC107786233;LOC107770077	17.6	2	17.477			7652000	0	5228700	4.29357e+06	0	0	0	0	#DIV/0!
A0A1S3ZD07;A0A1S4BKR3;A0A1S3YN59;A0A1S4C7M3;A0A1S4BHC9;A0A1S3ZLH1;A0A1S3YYU9;A0A1S3X0H7;A0A1S3X0Q6	1-aminocyclopropane-1-carboxylate oxidase; 1-aminocyclopropane-1-carboxylate oxidase-like	LOC107785346;LOC107809374	21.5	2	35.901			186530000	184290000	197000000	1.89273e+08	244790000	236160000	198610000	226520000	0.83557
A0A1S3YAY2	1-aminocyclopropane-1-carboxylate oxidase-like	LOC107774406	27.5	7	35.962			314780000	319840000	338470000	3.24363e+08	339220000	320280000	348440000	335980000	0.965425
A0A1S4ACF1;A0A1S3ZA26	1-aminocyclopropane-1-carboxylate oxidase-like	LOC107796076;LOC10778458	12.5	1	36.389			0	0	47226000	15742000	0	0	0	0	#DIV/0!
A0A1S4DQZ7;A0A1S3Y996	1-aminocyclopropane-1-carboxylate oxidase-like isoform X1; 1-aminocyclopropane-1-carboxylate oxidase-like	LOC107832510;	2.6	2	35.1			101550000	140200000	112300000	1.18017e+08	87757000	97188000	107850000	9.75983e+07	1.20921
A0A1S3YS15	1-deoxy-D-xylulose-5-phosphate reductoisomerase	LOC107779016	37.6	13	51.304			659420000	607210000	639170000	6.35267e+08	512510000	538430000	612520000	5.54487e+08	1.14568
A0A1S4CHE4	1-deoxy-D-xylulose-5-phosphate reductoisomerase	LOC107818871	37.6	1	51.359			14175000	11892000	0	8689000	8390100	13456000	15803000	12549700	0.692367
A0A1S4CGM2;A0A1S3ZTW9	1-deoxy-D-xylulose-5-phosphate synthase	LOC107818796;LOC107790348	13	7	77.478			154730000	117590000	122300000	131540000	84882000	130460000	128170000	114504000	1.14878
A0A1S3XIX6;A0A1S4BMB4	2,3-dimethylmalate lyase-like	LOC107765651;LOC107809819	10.9	3	47.052			29836000	33718000	34087000	32547000	41762000	34626000	35342000	3.72433e+07	0.873901
A0A1S4AT49;A0A1S3Z4M4	2,4-dienoyl-CoA reductase ((3E)-enoyl-CoA-producing)	LOC107800988	5.1	1	27.833			115360000	0	0	3.84533e+07	0	0	0	0	#DIV/0!
A0A077DBL2	20 kDa chaperonin, chloroplastic-like	LOC107831277	69.8	19	26.37			8123300000	7348400000	7647300000	7.70633e+09	2209500000	2120200000	3768700000	2.69947e+09	2.85476
A0A1S3XVM3	20 kDa chaperonin, chloroplastic-like	LOC107769079	69.8	16	26.398			6336500000	6307000000	5414500000	6.01933e+09	1521200000	2499000000	1293900000	1.77137e+09	3.39813
A0A1S4BLU8	20 kDa chaperonin, chloroplastic-like	LOC107809711	57	9	26.226			1592100000	1589900000	1583600000	1.58853e+09	1944400000	1702800000	1672000000	1.77307e+09	0.895924
A0A1S4CSL9	20 kDa chaperonin, chloroplastic-like	LOC107822109	61.1	2	26.33			886510000	815210000	751460000	8.17727e+08	267380000	213100000	309800000	2.63427e+08	3.10419
A0A1S3WYA8	20 kDa chaperonin, chloroplastic-like	LOC107759119	69.8	1	26.369			747080000	876260000	893280000	8.38873e+08	661270000	693480000	526530000	6.27093e+08	1.33772
A0A1S3ZE68	21 kDa protein-like	LOC107785790	35.6	6	20.72			671620000	542130000	573010000	5.95587e+08	645310000	735910000	716870000	6.99363e+08	0.851613
A0A1S4BUK0	21 kDa protein-like isoform X1	LOC107812028	35.6	1	20.795			74564000	58090000	55761000	62805000	53735000	38961000	74633000	5.57763e+07	1.12602
O24124;A0A1S4DQ54	22 kDa polypeptide; plasma membrane-associated cation-binding protein 1-like isoform X2	drepp4;LOC107832242	64.5	11	21.335			442700000	408360000	366340000	405800000	680160000	617710000	645670000	6.47847e+08	0.626383
A0A1S3XWU9	23 kDa subunit of oxygen evolving system of photosystem II	LOC107769475	48.1	12	28.579			14819000000	15108000000	15203000000	1.50433e+10	23639000000	20382000000	16813000000	20278000000	0.741855
A0A1S3ZHH0	23 kDa subunit of oxygen evolving system of photosystem II	LOC107786772	52.5	12	26.698			5890300000	5725600000	6814500000	6.14347e+09	4754000000	4008200000	4089300000	4.28383e+09	1.4341
A0A1S3XBA9	23 kDa subunit of oxygen evolving system of photosystem II	LOC107763119	61	13	26.946			5674100000	6437200000	9378600000	7163300000	1995000000	1703900000	1807300000	1835400000	3.90285
A0A1S4AA25	23 kDa subunit of oxygen evolving system of photosystem II	LOC107795331	32.8	8	32.598			536850000	579100000	528850000	5.48267e+08	680050000	566330000	562730000	6.03037e+08	0.909176
A0A1S3ZFX1	23 kDa subunit of oxygen evolving system of photosystem II	LOC107786300	36.5	8	29.049			526950000	513850000	521550000	5.20783e+08	169220000	224770000	417040000	2.70343e+08	1.92638
A0A1S4CNB7;A0A1S4CHD5	23 kDa subunit of oxygen evolving system of photosystem II	LOC107820719	34.1	6	29.577			463230000	469890000	506200000	4.79773e+08	561810000	505960000	531300000	5.33023e+08	0.900098
A0A1S3Z424;A0A1S4CTH3	23 kDa subunit of oxygen evolving system of photosystem II	LOC107782565	31.9	7	33.29			453320000	389030000	405340000	4.15897e+08	445050000	420030000	451300000	4.38793e+08	0.947819
A0A1S3ZIT1;A0A1S3Y0S1	23 kDa subunit of oxygen evolving system of photosystem II	LOC107787263	24.5	5	30.33			428600000	431840000	407290000	4.22577e+08	558290000	525410000	588600000	5.57433e+08	0.758076
A0A1S3XEK9	23 kDa subunit of oxygen evolving system of photosystem II	LOC107764259	14.5	3	25.914			141840000	173610000	158160000	157870000	121000000	151300000	141080000	1.37793e+08	1.1457
A0A1S3ZWT7	23 kDa subunit of oxygen evolving system of photosystem II	LOC107791372	25.4	2	39.296			118710000	105740000	118210000	114220000	134940000	128990000	120350000	1.28093e+08	0.891694
A0A1S4CEA3	23 kDa subunit of oxygen evolving system of photosystem II	LOC107817913	52.7	1	26.505			149890000	116740000	124290000	1.30307e+08	355870000	455320000	199710000	3.36967e+08	0.386705
A0A1S3YCF0	23 kDa subunit of oxygen evolving system of photosystem II	LOC107774757	52.5	1	26.614			32017000	32247000	53111000	39125000	41592000	23244000	47652000	37496000	1.04344
A0A1S4A2H7	23 kDa subunit of oxygen evolving system of photosystem II	LOC107793066	31.2	1	28.871			88576000	71203000	88781000	8.28533e+07	95692000	125150000	98607000	106483000	0.77809
A0A1S3YJ19	23 kDa subunit of oxygen evolving system of photosystem II	LOC107776818	27.7	5	27.811			61832000	60683000	69249000	6.39213e+07	76203000	64322000	53791000	64772000	0.986867
A0A1S4BRS0	23 kDa subunit of oxygen evolving system of photosystem II	LOC107811196	10.4	2	26.252			31063000	34986000	38354000	34801000	46396000	43079000	44039000	4.45047e+07	0.781963
A0A1S4ASN5	23 kDa subunit of oxygen evolving system of photosystem II	LOC107800868	24.6	3	29.216			27350000	0	28555000	18635000	0	0	42277000	1.40923e+07	1.32235
A0A1S4CJP7	23 kDa subunit of oxygen evolving system of photosystem II	LOC107819812	10.2	1	26.811			10447000	12661000	0	7.70267e+06	14272000	14749000	13990000	14337000	0.537258
A0A1S4CN64	23 kDa subunit of oxygen evolving system of photosystem II	LOC107820852	13.6	1	25.719			0	20539000	10783000	1.04407e+07	0	14342000	15154000	9832000	1.06191
A0A1S3Z2H2	26S protease regulatory subunit 6A homolog	LOC107782228	30.7	9	47.457			206340000	232830000	222670000	2.20613e+08	160260000	238230000	192590000	1.97027e+08	1.11971
A0A1S4DB07;A0A1S3ZWP0;A0A1S3XZG8;A0A1S4BDW5;A0A1S4BKX0;A0A1S3XYB6	26S protease regulatory subunit 6B homolog	LOC107827877;LOC107791257	34.1	12	46.541			435340000	513600000	470400000	4.73113e+08	415390000	454250000	437720000	4.35787e+08	1.08565
A0A1S4BWC7;A0A1S3ZUY8;A0A1S4BD70;A0A1S3ZPG6	26S protease regulatory subunit 7 homolog A isoform X1; 26S protease regulatory subunit 7 homolog A-like	LOC107812550;L	28	11	47.769			442250000	459250000	460250000	4.53917e+08	301260000	389670000	360250000	3.50393e+08	1.29545
L7UU40;A0A1S4BWC8;A0A1S4C9L8;A0A1S4DNV3;A0A1S4C2L7	26S protease regulatory subunit 8 homolog A-like	RPT6;LOC107812523	28.1	8	47.175			161560000	220450000	169680000	1.83897e+08	165820000	141040000	152270000	1.53043e+08	1.2016
A0A1S3ZBT5;A0A1S3Z644	26S protease regulatory subunit S10B homolog B-like	LOC107785094;L	33	11	44.72			446450000	490160000	467150000	467920000	324200000	385450000	455950000	3.88533e+08	1.20432
A0A1S4C6S2;A0A1S3XHC5;A0A1S3X5G6;A0A1S3XR20	26S protease regulatory subunit S10B homolog B-like	LOC107815805;L	33.2	1	44.616			16354000	0	23339000	13231000	0	19729000	0	6.57633e+06	2.01191
A0A1S4B4M6;A0A1S4BHP4;A0A1S3Z6E1	26S proteasome non-ATPase regulatory subunit 1 homolog	LOC107804491	21.7	14	108.01			412030000	435570000	363580000	4.03727e+08	383940000	367250000	379950000	3.77047e+08	1.07076
A0A1S4C616;A0A1S4B826	26S proteasome non-ATPase regulatory subunit 11 homolog	LOC107815473	38.5	13	47.135			429100000	372020000	400370000	4.00497e+08	283490000	316990000	395270000	3.31917e+08	1.20662
A0A1S4BE89;A0A1S3ZH74	26S proteasome non-ATPase regulatory subunit 11 homolog	LOC107807364	22.4	4	49.17			81315000	73064000	63557000	7.26453e+07	54498000	0	75677000	4.33917e+07	1.67418
A0A1S4DRG2;A0A1S4DFP5;A0A1S4BHZ9;A0A1S4B2W6	26S proteasome non-ATPase regulatory subunit 12 homolog A-like	LOC107832668	11.3	4	50.611			84037000	99793000	83103000	8.89777e+07	62690000	85364000	80286000	7.61133e+07	1.16902
A0A1S3Z749;A0A1S4CVG1	26S proteasome non-ATPase regulatory subunit 13 homolog B; 26S proteasome non-ATPase regulatory subunit 13 homolog B-like	LOC107783713	7	3	44.171			151880000	92779000	104420000	1.1636e+08	130590000	208460000	113160000	1.50737e+08	0.77194
A0A1S4BB42	26S proteasome non-ATPase regulatory subunit 13 homolog B-like	LOC107806446	7.8	2	44.26			18228000	17670000	21046000	1.89813e+07	12147000	0	23503000	1.18833e+07	1.59731
A0A1S3ZUL4;A0A1S4ARN3	26S proteasome non-ATPase regulatory subunit 14 homolog	LOC107790582	25	7	34.777			172800000	168980000	201670000	181150000	111650000	143710000	161200000	1.38853e+08	1.30461
A0A1S4A6I2;A0A1S4BRZ8	26S proteasome non-ATPase regulatory subunit 2 homolog	LOC107794282	25.1	18	98.117			726680000	676450000	737510000	7.13547e+08	557540000	615170000	662610000	6.11773e+08	1.16636
A0A1S3ZRW6	26S proteasome non-ATPase regulatory subunit 2 homolog	LOC107789750	23.5	1	89.947			16067000	13701000	16574000	1.54473e+07	0	0	0	0	#DIV/0!
A0A1S4CMV5;A0A1S4BWP8	26S proteasome non-ATPase regulatory subunit 2 homolog; 26S proteasome non-ATPase regulatory subunit 2 homolog A-like	LOC107820776	23	7	98.721			287770000	256460000	264830000	2.69687e+08	200780000	234710000	245740000	2.27077e+08	1.18765
A0A1S4BGN4;A0A1S3XYY2;A0A1S4CRF2;A0A1S4AJL5	26S proteasome non-ATPase regulatory subunit 4 homolog	LOC107808066	9.2	3	42.452			59186000	70478000	51824000	60496000	68141000	56313000	53766000	5.94067e+07	1.01834
A0A1S4BDG3;A0A1S4CIH1	26S proteasome non-ATPase regulatory subunit 6 homolog	LOC107807153	32.9	10	44.273			280600000	290610000	277400000	282870000	204080000	271250000	272960000	249430000	1.13407
A0A1S4B8H0	26S proteasome non-ATPase regulatory subunit 7 homolog A	LOC107805666	37.7	9	34.946			556980000	446590000	422610000	4.75393e+08	355730000	473350000	436470000	421850000	1.12693
A0A1S4BZ10;A0A1S3X8R4	26S proteasome non-ATPase regulatory subunit 8 homolog A-like	LOC107813385	36.3	7	30.946			201140000	225510000	174460000	200370000	212670000	192310000	179460000	1.94813e+08	1.02852
A0A1S4BMK9;A0A1S3X8B2	26S proteasome non-ATPase regulatory subunit 8 homolog A-like; 26S proteasome non-ATPase regulatory subunit 8 homolog A-like isoform X1	LOC107809911	13.1	1	30.904			9018100	8508600	0	5.84223e+06	9216900	0	0	3072300	1.90158
A0A1S4CHP1;A0A1S3YS72;A0A1S3ZR12	26S proteasome regulatory subunit 4 homolog A-like; 26S proteasome regulatory subunit 4 homolog A	LOC107819147;LOC10777	35.1	11	49.455			379180000	343320000	369190000	3.63897e+08	253130000	315610000	290650000	2.86463e+08	1.27031
A0A1S3Z3J7	28 kDa ribonucleoprotein, chloroplastic	LOC107782611	24.7	6	32.169			194130000	165260000	161140000	173510000	226420000	209500000	222980000	2.19633e+08	0.789998
A0A1S4AK52	28 kDa ribonucleoprotein, chloroplastic-like	LOC107798585	29.4	7	32.518			280180000	319290000	304390000	3.01287e+08	294570000	316760000	308550000	3.06627e+08	0.982585
A0A1S3ZE61	28 kDa ribonucleoprotein, chloroplastic-like	LOC107785853	23.5	1	32.567			156700000	92960000	150240000	133300000	106030000	0	70292000	58774000	2.26801
A0A1S3YB66;A0A1S3ZU32	28 kDa ribonucleoprotein, chloroplastic-like; 28 kDa ribonucleoprotein, chloroplastic	LOC107774439;LOC107790472	36.4	6	32.403			2400100000	2479400000	2831800000	2.57043e+09	3484700000	2549400000	2439700000	2824600000	0.910017
A0A1S4CYJ5	29 kDa ribonucleoprotein A, chloroplastic	LOC107824003	58.6	4	29.674			1605100000	1738300000	1547300000	1.63023e+09	1726900000	1615600000	1438300000	1593600000	1.02299
A0A1S4C519	29 kDa ribonucleoprotein A, chloroplastic-like isoform X1	LOC107815238	56.3	13	31.099			8352600000	8237700000	7119200000	7.90317e+09	9487700000	7154000000	7640200000	8.09397e+09	0.976427
A0A1S4A1E8	29 kDa ribonucleoprotein B, chloroplastic	LOC107792669	61.9	5	31.146			847710000	863260000	747010000	8.19327e+08	927960000	885140000	907680000	9.06927e+08	0.90341
Q9SLN8;A0A1S4DL05	2-alkenal reductase (NADP(+)-dependent)	DBR	49.3	14	38.088			1621800000	1741800000	1606600000	1.65673e+09	2027500000	1852800000	1795500000	1.89193e+09	0.875683
A0A1S4D3I5	2-alkenal reductase (NADP(+)-dependent)-like	LOC107825579	30.9	3	38.053			131820000	125350000	100690000	1.19287e+08	118690000	233660000	177220000	1.76523e+08	0.675756
A0A1S3Z7L2;A0A1S3YDJ6	2-alkenal reductase (NADP(+)-dependent)-like	LOC107783865;LOC107774912	8.5	3	39.029			26088000	29247000	36089000	3.04747e+07	29432000	29958000	35428000	31606000	0.964205
A0A1S4D570;A0A1S4B2Z1	2-alkenal reductase (NADP(+)-dependent)-like	LOC107826139;LOC107804017	17.5	3	37.988			24286000	26935000	24403000	25208000	30626000	27254000	25947000	2.79423e+07	0.902144
A0A1S4DFD6;A0A1S3YCA3	2-C-methyl-D-erythritol 2,4-cyclodiphosphate synthase	LOC107829217	34.6	6	24.788			251840000	205240000	207150000	221410000	203850000	235550000	194280000	2.11227e+08	1.04821
A0A1S3ZYY2	2-C-methyl-D-erythritol 4-phosphate cytidylyltransferase	LOC107791921	37.2	10	34.268			309490000	280600000	289380000	2.93157e+08	396130000	367540000	347290000	370320000	0.791631
A0A1S3XTE4	2-C-methyl-D-erythritol 4-phosphate cytidylyltransferase	LOC107768615	30.1	1	34.626			19253000	17472000	22805000	1.98433e+07	29258000	21544000	26512000	2.57713e+07	0.769977
A0A1S4D325;A0A1S3Z143;A0A1S4DMW1	2-hydroxyacyl-CoA lyase-like	LOC107825460;LOC107781829	8.9	4	61.508			49127000	59280000	46869000	5.17587e+07	50428000	41304000	43907000	45213000	1.14477
A0A1S4AAA5	2-hydroxyisoflavanone dehydratase-like	LOC107795400	3.8	1	35.101			24809000	6462500	3469900	1.15805e+07	29792000	5579700	9078600	1.48168e+07	0.781579
A0A1S3ZY45;A0A1S3X320;A0A1S3YJU4	2-isopropylmalate synthase	LOC107791752;LOC107760648	23.3	11	65.761			442570000	429260000	460350000	444060000	385260000	403080000	443750000	4.10697e+08	1.08124
A0A1S4BH45;A0A1S4CV98	2-isopropylmalate synthase	LOC107808199;LOC107822963	17	2	65.961			41139000	62432000	41527000	48366000	48629000	46983000	59181000	5.15977e+07	0.937368
A0A1S4A3G8;A0A1S3ZC87;A0A1S4C3K9	2-like	LOC107793310;LOC107785265	20.9	3	19.994			0	11968000	11773000	7.91367e+06	0	0	0	0	#DIV/0!
A0A1S3Y838;A0A1S4C1W2	2-methyl-6-phytyl-1,4-hydroquinone methyltransferase, chloroplastic-like	LOC107773365	46.3	12	38.037			981910000	1056100000	1050000000	1.02934e+09	858800000	920570000	1006400000	928590000	1.10849
A0A1S4A2T2;A0A1S3X4I9	2-methyl-6-phytyl-1,4-hydroquinone methyltransferase, chloroplastic-like	LOC107793127	11.5	2	38.201			169290000	138900000	176250000	161480000	164740000	188260000	171460000	174820000	0.923693
A0A1S4D561;A0A1S3Z974	2-methylacyl-CoA dehydrogenase, mitochondrial-like isoform X1; 2-methylacyl-CoA dehydrogenase, mitochondrial isoform X1	LOC107826001	18	5	44.953			62214000	65510000	67417000	65047000	58517000	91050000	84058000	77875000	0.835274
A0A1S3X5Z4	2-methylene-furan-3-one reductase	LOC107761424	68.6	26	41.22			7558800000	7161400000	6812500000	7.17757e+09	9508200000	8398300000	8226600000	8.71103e+09	0.823963
A0A1S4CQ81	2-methylene-furan-3-one reductase-like	LOC107821492	59	10	41.109			1876500000	1564900000	1729200000	1.72353e+09	1971800000	1902300000	1877500000	1917200000	0.898985
A0A1S3Y3V0	3(2),5-bisphosphate nucleotidase	LOC107771952	13.6	3	43.919			90896000	102040000	112290000	101742000	162520000	112770000	112130000	129140000	0.787843
A0A1S4CFQ0	3(2),5-bisphosphate nucleotidase	LOC107818321	14.1	1	42.392			0	34936000	28259000	21065000	36203000	29519000	36870000	3.41973e+07	0.615984
A0A1S4AJ51	30S ribosomal protein 2, chloroplastic-like	LOC107798186	37.9	13	26.524			2601200000	2779200000	2626000000	2668800000	3027400000	2690000000	2683900000	2.80043e+09	0.952995
A0A1S4AHU7	30S ribosomal protein 2, chloroplastic-like	LOC107797860	36.1	5	27.888			461770000	416970000	398950000	4.25897e+08	503560000	414440000	437210000	4.51737e+08	0.942799
A0A1S4A558;A0A1S3XAP4;A0A1S4ADJ5	30S ribosomal protein 3, chloroplastic-like	LOC107793852;LOC107762951	18.5	2	19.467			52892000	39528000	76009000	56143000	43894000	0	45341000	29745000	1.88748
A0A1S4BKP7;A0A1S4AHQ7	30S ribosomal protein 3, chloroplastic-like; 30S ribosomal protein 3-1, chloroplastic-like	LOC107809317;LOC107797818	40	4	19.599			728730000	739240000	757890000	7.41953e+08	736970000	772880000	741740000	750530000	0.988573
A0A1S4BID9;A0A1S4AQ07	30S ribosomal protein S1, chloroplastic-like	LOC107808631;LOC107800017	48.1	21	45.49			3012400000	2975500000	3023100000	3.00367e+09	2885600000	2961000000	3079500000	2.97537e+09	1.00951
A0A1S4CCF2;A0A1S4B036	30S ribosomal protein S10, chloroplastic-like	LOC107817346;LOC107803063	25.3	4	20.704			655770000	651660000	612290000	6.39907e+08	487640000	513180000	566400000	5.22407e+08	1.22492
A0A1S4BWG5	30S ribosomal protein S13, chloroplastic-like	LOC107812601	35.1	7	18.775			481860000	557560000	485220000	5.08213e+08	443650000	377310000	316590000	3.79183e+08	1.34028
A0A1S4CWV7	30S ribosomal protein S13, chloroplastic-like	LOC107823491	35.1	2	18.823			28951000	33128000	36995000	3.30247e+07	24940000	29834000	28139000	2.76377e+07	1.19492
A0A140G1X6	30S ribosomal protein S15	rps15	47.1	4	10.445			189770000	250140000	215510000	2.18473e+08	122780000	154310000	143990000	140360000	1.55652
A0A1S3ZRI7;A0A076L4N7;A0A1S4D890	30S ribosomal protein S15, chloroplastic	LOC107789793;LOC107789702	45	6	17.061			841600000	945320000	959920000	9.15613e+08	402620000	512740000	610770000	508710000	1.79987
A0A1S4ALC8	30S ribosomal protein S15, chloroplastic	LOC107798994	23.2	15	81.259			441360000	464380000	433080000	4.46273e+08	393750000	413560000	457230000	4.21513e+08	1.05874
A0A1S3YNF7	30S ribosomal protein S15, chloroplastic	LOC107777878	22.5	2	81.251			0	12325000	17294000	9873000	11380000	12155000	15367000	1.29673e+07	0.761375
A0A1S4C661	30S ribosomal protein S17, chloroplastic	LOC107815349	29.7	5	17.557			269780000	289280000	298260000	2.85773e+08	305700000	274670000	308730000	2.96367e+08	0.964256
A0A1S4CKF3	30S ribosomal protein S17, chloroplastic	LOC107819989	29.7	1	17.431			23392000	24925000	25269000	2.45287e+07	26329000	24602000	24365000	2.50987e+07	0.97729
A0A1S4C631	30S ribosomal protein S1-like	LOC107815564	44.4	5	66.521			474730000	595180000	543910000	537940000	656160000	494180000	631490000	5.93943e+08	0.905709
A0A1S4DN69;A0A1S3X674	30S ribosomal protein S1-like	LOC107831599;LOC107761621	20.7	6	42.607			282700000	250800000	274050000	2.69183e+08	263820000	231600000	292310000	2.62577e+08	1.02516
A0A1S4BVE0	30S ribosomal protein S20, chloroplastic-like	LOC107812256	17.2	6	22.741			114590000	196750000	194830000	1.68723e+08	118770000	111330000	117320000	1.15807e+08	1.45694
A0A1S3YJI3	30S ribosomal protein S20, chloroplastic-like	LOC107776799	34.9	1	14.35			0	16890000	19786000	1.22253e+07	0	0	12334000	4.11133e+06	2.97357
A0A1S4CIR6;A0A1S4ADG0	30S ribosomal protein S31, chloroplastic-like	LOC107819499	28.2	4	11.611			114110000	156440000	117430000	1.29327e+08	132470000	82429000	102770000	1.0589e+08	1.22133
A0A1S4DQ73;A0A1S4A5R3	30S ribosomal protein S31, chloroplastic-like	LOC107832268;LOC107794053	19.3	1	12.122			38250000	47533000	27372000	3.77183e+07	37750000	34491000	31668000	3.46363e+07	1.08898
A0A1S4D2U5;A0A1S4D4D9;A0A1S4D9T7;A0A1S4AT91	30S ribosomal protein S5, chloroplastic; 30S ribosomal protein S5, chloroplastic-like	LOC107825411;LOC107825867	39.7	13	32.269			1210200000	1373400000	1412900000	1.33217e+09	779980000	1089700000	1108500000	9.92727e+08	1.34193
A0A1S4BZ86;A0A1S4D6N4;A0A1S3XVB2;A0A1S3XX55	30S ribosomal protein S6 alpha, chloroplastic-like	LOC107813387;LOC	5.2	1	21.254			194540000	194980000	211050000	200190000	232440000	458050000	207800000	299430000	0.66857
A0A1S3ZP89;A0A1S4BNK0	30S ribosomal protein S9, chloroplastic-like	LOC107788887;LOC107810208	30.9	6	22.506			904090000	1060200000	867150000	9.43813e+08	620590000	706740000	656020000	6.61117e+08	1.4276
A0A1S4C3J4	31 kDa ribonucleoprotein, chloroplastic	LOC107814688	68.8	20	31.202			10796000000	11116000000	11553000000	11155000000	11617000000	11129000000	10112000000	1.09527e+10	1.01847
A0A1S3XX03	31 kDa ribonucleoprotein, chloroplastic	LOC107769683	41.6	12	35.049			6501600000	6379500000	6395800000	6.42563e+09	8221600000	7065800000	7197600000	7495000000	0.857323
A0A1S3ZIC0;A0A1S3Y6H3	31 kDa ribonucleoprotein, chloroplastic-like	LOC107787074;LOC107772527	39.2	4	35.625			1717800000	1708600000	1547300000	1657900000	1938600000	1752800000	1847200000	1846200000	0.898007
A0A1S3XR72	33 kDa ribonucleoprotein, chloroplastic	LOC107767634	23.5	7	35.381			845200000	734860000	808830000	7.96297e+08	910290000	815830000	842760000	8.56293e+08	0.929934
A0A1S3XUD0	33 kDa ribonucleoprotein, chloroplastic-like	LOC107768838	24.8	1	34.799			8173400	0	0	2.72447e+06	0	0	11599000	3.86633e+06	0.704664
A0A1S3XSG1;A0A1S3X824;A0A1S3Y7V3	3-dehydroquinate synthase homolog	LOC107768227;LOC107762215	5	2	44.339			14323000	16130000	14929000	1.51273e+07	20751000	12945000	14572000	1.60893e+07	0.940209
A0A1S3ZK76	3-dehydroquinate synthase, chloroplastic	LOC107787846	29.6	3	47.558			60826000	65973000	67637000	64812000	78590000	63170000	89562000	7.71073e+07	0.840543
A0A1S3XSV4	3-dehydroquinate synthase, chloroplastic-like	LOC107768348	32.1	12	49.163			408230000	365500000	389860000	3.87863e+08	312100000	379670000	365290000	3.52353e+08	1.10078
A0A1S4CUN3;A0A1S3XA08;A0A1S4AGB6	3-deoxy-8-phosphooctulonate synthase	LOC107822777;LOC107762726	23.4	5	31.849			47494000	51085000	117440000	7.20063e+07	60103000	69178000	66242000	6.51743e+07	1.10483
A0A1S4CVU5	3-hexulose-6-phosphate isomerase-like	LOC107823241	16.1	2	21.127			11383000	17517000	13302000	1.40673e+07	39850000	18624000	13124000	23866000	0.58943
A0A1S3ZIF8	3-hexulose-6-phosphate isomerase-like	LOC107787048	7.4	1	21.287			0	0	0	0	0	0	0	0	#DIV/0!
A0A1S4DHM5;A0A1S4B6H3;A0A1S4DJN8	3-hydroxyacyl-[acyl-carrier-protein] dehydratase	LOC107829909;LOC1078	30.4	6	24.853			367130000	351160000	369850000	3.62713e+08	430960000	375330000	391520000	399270000	0.908441
A0A1S3ZYP2;A0A1S4CWE1	3-hydroxyisobutyryl-CoA hydrolase-like protein 3, mitochondrial	LOC107791844	8.7	2	46.859			27648000	0	0	9216000	0	26750000	20904000	1.58847e+07	0.580182
A0A1S3Z3D3;A0A1S4BL32	3-hydroxyisobutyryl-CoA hydrolase-like protein 3, mitochondrial	LOC107782325	10.3	3	41.424			33259000	31209000	31147000	3.18717e+07	21646000	26339000	28511000	2.54987e+07	1.24993
A0A1S3YJY3;A0A1S3Y2C8	3-hydroxyisobutyryl-CoA hydrolase-like protein 5	LOC107776974;LOC1077	13.5	4	42.64			43119000	49817000	50358000	4.77647e+07	42875000	51074000	58163000	50704000	0.94203
A0A1S3ZNG4	3-isopropylmalate dehydratase	LOC107788625	6.5	1	55.224			26990000	30088000	23869000	2.69823e+07	27114000	26150000	35012000	2.94253e+07	0.916976
A0A1S3Y7F1	3-isopropylmalate dehydratase large subunit-like	LOC107773264	12.1	1	21.786			86637000	85193000	88081000	86637000	77689000	78055000	74647000	76797000	1.12813
A0A1S3ZN66;A0A1S4AD64;A0A1S4DIL9;A0A1S3ZG65	3-isopropylmalate dehydratase large subunit-like; 3-isopropylmalate dehydratase	LOC107788624;LOC107796306	13.3	5	48.575			167470000	228800000	237520000	2.11263e+08	195180000	210770000	210140000	2.05363e+08	1.02873
A0A1S4DAA2;A0A1S3XKF1;A0A1S4D9L5	3-isopropylmalate dehydratase small subunit 3-like	LOC107827507;LOC	34.9	6	27.328			231000000	277080000	261720000	256600000	289240000	280030000	270650000	2.79973e+08	0.916516
A0A1S3Z8Z5	3-isopropylmalate dehydrogenase	LOC107784121	31.9	11	43.473			1321600000	1299100000	1286300000	1.30233e+09	1597600000	1453800000	1324200000	1.45853e+09	0.892906
A0A1S3X0W6	3-isopropylmalate dehydrogenase	LOC107760060	31.9	2	43.334			109840000	99482000	89017000	9.94463e+07	116470000	91833000	129250000	1.12518e+08	0.883829
A0A1S3XLY5;A0A1S4BQL5	3-ketoacyl-CoA synthase	LOC107766412;LOC107810871	5.8	2	55.874			27225000	22492000	28185000	2.59673e+07	29299000	29315000	35412000	31342000	0.828516
A0A1S4C3B2;A0A1S4BRN3	3-ketoacyl-CoA synthase	LOC107814680;LOC107811181	2.8	1	60.727			0	0	0	0	0	0	0	0	#DIV/0!
A0A1S4D1D4;A0A1S4BFQ9;A0A1S3Y0H1;A0A1S3XVB0	3-ketoacyl-CoA thiolase 2, peroxisomal; 3-ketoacyl-CoA thiolase 2, peroxisomal-like	LOC107824909;LOC107807744	18.3	6	48.836			231810000	143020000	220270000	1.98367e+08	256800000	240740000	249110000	2.48883e+08	0.797027
H9CCH7	3-oxoacyl-[acyl-carrier-protein] reductase	KAR	19.4	5	33.997			157670000	165090000	150470000	1.57743e+08	183800000	141840000	173020000	166220000	0.949003
A0A1S3ZI83;A0A1S3X5Z5;A0A1S3XZM6;A0A1S4B7A9	3-oxoacyl-[acyl-carrier-protein] reductase	LOC107787149;LOC107761555	15.6	2	33.651			14945000	0	21779000	1.22413e+07	18010000	16431000	19325000	17922000	0.683034
A0A1S3XFF8	3-oxoacyl-[acyl-carrier-protein] reductase	LOC107764635	19.5	1	33.878			18979000	19359000	31372000	2.32367e+07	17040000	21746000	28475000	2.24203e+07	1.03641
A0A1S4B047;A0A1S3YFP1	3-oxoacyl-[acyl-carrier-protein] synthase	LOC107803192;LOC107775757	20.8	8	49.925			663380000	721570000	638540000	6.74497e+08	543790000	702810000	539700000	5.95433e+08	1.13278
A0A1S4C7K6;C0SUC5;A0A1S4B9B5;A0A1S3XWC9	3-oxo-Delta(4,5)-steroid 5-beta-reductase-like	LOC107816081;Nt-5beta-POR-A	38.9	13	43.692			339780000	367750000	356040000	3.54523e+08	329140000	389070000	331420000	3.49877e+08	1.01328
A0A1S4AEH4	3-phosphoshikimate 1-carboxyvinyltransferase	LOC107796782	16.6	7	55.456			205960000	203060000	196200000	201740000	186210000	180130000	166540000	1.77627e+08	1.13575
P23981;A0A1S4C0K4;A0A1S4AH62;P23281	3-phosphoshikimate 1-carboxyvinyltransferase 1, chloroplastic; 3-phosphoshikimate 1-carboxyvinyltransferase	EPSPS-1;LOC107813883	16	2	55.711			74917000	77689000	70358000	7.43213e+07	73178000	74628000	73700000	7.38353e+07	1.00658
A0A1S3Y7T6	3-phosphoshikimate 1-carboxyvinyltransferase, chloroplastic-like	LOC107773355	23.9	1	14.62			23476000	23868000	19246000	2.21967e+07	19100000	0	0	6.36667e+06	3.48639
A0A1S4CU11;A0A1S3ZLD8	4-(cytidine 5-diphospho)-2-C-methyl-D-erythritol kinase	LOC107822567	10.5	4	45.268			143940000	160690000	137790000	1.47473e+08	113660000	119890000	116950000	1.16833e+08	1.26225
A0A1S4DHU6;A0A1S3YX67;A0A1S4AFT8	40S ribosomal protein S10-1-like	LOC107829891;LOC107780640	30.3	6	23.09			821280000	1174000000	925960000	9.73747e+08	559540000	627780000	543570000	5.76963e+08	1.68771
A0A1S3ZBE2;A0A1S4BRV1	40S ribosomal protein S11; 40S ribosomal protein S11-like	LOC107785006;LOC107811223	44.7	8	17.685			510650000	798900000	663580000	657710000	354490000	430260000	332850000	3.72533e+08	1.76551
A0A1S4BW10	40S ribosomal protein S11-like	LOC107812432	44.7	1	17.687			59965000	68808000	53422000	6.07317e+07	32536000	37639000	34674000	3.49497e+07	1.73769
A0A1S3YCF2;A0A1S4BDS2	40S ribosomal protein S12	LOC107774609;LOC107807187	52.5	6	14.928			559910000	413150000	650940000	5.41333e+08	608190000	517520000	459520000	528410000	1.02446
A0A1S4CTG4;A0A1S3Y2M2;A0A1S4BEE0;A0A1S4B129;A0A1S3Y2Z6	40S ribosomal protein S12	LOC107822385;LOC107771517	52.5	2	14.958			323900000	222440000	282570000	2.76303e+08	355450000	280440000	234940000	2.90277e+08	0.951862
A0A1S3XAN1;A0A1S4DEV9;A0A1S3X3E1;P93377	40S ribosomal protein S14-2; 40S ribosomal protein S14-2-like	LOC107763058;LOC107829070	52	11	16.345			974100000	1198400000	1090900000	1087800000	739810000	773630000	871190000	7.94877e+08	1.36851
A0A1S3Y218	40S ribosomal protein S14-2-like	LOC107771427	48.7	1	16.357	+		0	0	0	0	0	0	0	0	#DIV/0!
A0A1S4DBQ8;A0A1S4AMQ9	40S ribosomal protein S15a-1	LOC107828126	29.2	4	14.79			379640000	453590000	496530000	4.43253e+08	197340000	284930000	319330000	267200000	1.65888
A0A1S4DFI4;A0A1S4DK43;A0A1S3ZWA5;A0A1S3ZDL6;A0A1S4A0S2;A0A1S3XW69	40S ribosomal protein S15-like; 40S ribosomal protein S15	LOC107829071;LOC107830654	36.8	4	17.239			343200000	428320000	467160000	4.12893e+08	271500000	310290000	346340000	3.09377e+08	1.3346
A0A1S4AU23	40S ribosomal protein S16	LOC107801293	70.1	2	16.697			325300000	428830000	435780000	3.96637e+08	194410000	273190000	288130000	251910000	1.57452
A0A1S3X7H4;A0A1S3YW93;A0A1S3Y1I0	40S ribosomal protein S16-like	LOC107762148;LOC107780276	68	11	16.804			1416300000	1589600000	1521000000	1.50897e+09	758310000	960130000	1019800000	9.12747e+08	1.65322
A0A1S3YUN7	40S ribosomal protein S16-like	LOC107779727	64.7	1	16.781			0	0	5464300	1.82143e+06	0	0	0	0	#DIV/0!
A0A077D9P0;A0A1S3YT61;A0A1S3YDL0;A0A1S4A9D1;A0A1S3X5L8;A0A1S3Z9G2	40S ribosomal protein S17; 40S ribosomal protein S17-like	LOC107769059;LOC107779419	54.9	9	16.25			653070000	878650000	976310000	836010000	676180000	585670000	541030000	600960000	1.39112
A0A1S4C8L1;A0A1S3YM01;A0A1S4ABQ2;A0A1S4AJE0	40S ribosomal protein S18-like; 40S ribosomal protein S18	LOC107816127;LOC107777446	48.7	9	17.523			1816900000	2366900000	2157700000	2.11383e+09	1083200000	1449300000	1459100000	1.33053e+09	1.58871
A0A1S4CYT7;A0A1S4BGI9;A0A1S4AWD4;A0A1S4ARC8	40S ribosomal protein S19-3-like	LOC107824112;LOC107808011	40.6	1	16.022			136790000	80378000	95434000	1.04201e+08	53791000	76714000	66282000	6.55957e+07	1.58853
A0A1S4B471;A0A1S3Y949;A0A1S4DGF0;A0A1S4B8I8	40S ribosomal protein S19-3-like; 40S ribosomal protein S19-3	LOC107804353;LOC107773605	51.7	8	16.087			1176600000	1331000000	1142300000	1.21663e+09	825820000	980950000	974860000	927210000	1.31214
A0A1S3XHL0	40S ribosomal protein S20-2	LOC107765328	47.5	1	13.628			162410000	127970000	113870000	134750000	106430000	108970000	124650000	113350000	1.1888
A0A1S4DRK4	40S ribosomal protein S20-2-like	LOC107832707	52.8	6	13.725			1188400000	1159700000	1121100000	1156400000	999790000	1004400000	940720000	9.81637e+08	1.17803
A0A1S4ANH8;A0A1S4A3T4;A0A1S4CG12;A0A1S4C2G0	40S ribosomal protein S21	LOC107799416;LOC107793454	52.6	3	8.8639			411050000	518410000	438220000	4.55893e+08	485250000	433280000	415180000	444570000	1.02547
A0A1S4C879;A0A1S4BTZ9;A0A1S4AM07;A0A1S3YFT2	40S ribosomal protein S23; 40S ribosomal protein S23-like	LOC107816169;LOC107811880	28.9	4	15.734			815600000	980650000	869320000	8.88523e+08	455070000	547470000	554750000	5.19097e+08	1.71167
A0A1S4C2S1	40S ribosomal protein S2-3-like	LOC107814537	50	16	30.623			1881800000	2177100000	2100300000	2.05307e+09	1186700000	1214300000	1499400000	1.30013e+09	1.57912
A0A1S4BKF0	40S ribosomal protein S2-3-like	LOC107809240	43.6	2	30.013			146120000	145380000	136810000	142770000	72424000	97640000	105470000	9.18447e+07	1.55447
A0A1S3XB04;A0A1S3XAX8	40S ribosomal protein S2-3-like	LOC107763154;LOC107763157	48.6	2	30.541			75643000	83415000	76732000	7.85967e+07	37927000	55097000	55553000	4.95257e+07	1.58699
A0A1S3ZXI6;A0A1S4ATE6	40S ribosomal protein S24	LOC107791538;LOC107801095	30.8	5	15.389			280220000	370840000	378480000	343180000	185260000	177930000	234390000	1.99193e+08	1.72285
A0A1S4AKL8	40S ribosomal protein S24	LOC107798733	27.1	1	15.403			18462000	22858000	23000000	21440000	0	13031000	12520000	8517000	2.51732
A0A076L2E2;A0A1S3ZK73	40S ribosomal protein S25	LOC107815372;LOC107787568	54.2	6	11.77			766760000	1006200000	910790000	8.94583e+08	449650000	549990000	660390000	5.53343e+08	1.61669
A0A1S4CWI7	40S ribosomal protein S26	LOC107823272	44.9	4	14.507			660290000	647970000	693120000	6.67127e+08	381340000	408300000	502760000	430800000	1.54858
A0A1S3XJK0;A0A1S4BH12	40S ribosomal protein S27	LOC107765692;LOC107808179	45.3	4	9.599			169700000	162380000	165300000	1.65793e+08	150080000	143180000	134850000	1.42703e+08	1.1618
A0A1S3Z9D9	40S ribosomal protein S27	LOC107784453	44.2	1	9.623			23240000	26102000	17043000	2.21283e+07	27839000	21115000	32204000	2.70527e+07	0.817972
A0A1S4BH20;A0A1S4CR70;A0A1S4BHX3	40S ribosomal protein S27	LOC107808170	45.3	1	9.5969	+		29024000	16848000	0	1.52907e+07	0	0	0	0	#DIV/0!
A0A1S4AS05;A0A1S4ANZ6	40S ribosomal protein S28; 40S ribosomal protein S28-like	LOC107800747;LOC107799618	40	3	7.4666			640240000	695680000	610020000	6.48647e+08	631340000	607690000	538220000	5.92417e+08	1.09492
A0A1S4DPT4;A0A1S4AAC1	40S ribosomal protein S29; 40S ribosomal protein S29-like	LOC107832143;LOC107795411	64.3	4	6.4425			276020000	246400000	278100000	266840000	139480000	201290000	222370000	1.87713e+08	1.42153
A0A1S4D6G4;A0A1S3XGJ0	40S ribosomal protein S30	LOC107826518;LOC107764876	16.1	1	6.9611			27313000	51080000	42937000	4.04433e+07	0	0	25843000	8.61433e+06	4.69489
A0A1S4CHD1;A0A1S4AB83;A0A1S4DPB2;A0A1S4BXU2	40S ribosomal protein S3-1-like; 40S ribosomal protein S3-3-like	LOC107819043;LOC107795696	48.7	16	26.59			1959600000	1976600000	1775700000	1.90397e+09	996720000	1278800000	1224700000	1166740000	1.63187
A0A1S3XJC8;A0A1S4CYC9;A0A1S3YMM6;A0A1S4A7B7	40S ribosomal protein S3a	LOC107765835	53.8	14	29.656			1148500000	1365900000	1218200000	1244200000	796730000	780600000	872830000	816720000	1.52341
A0A1S3ZCU3;A0A1S3YSQ9	40S ribosomal protein S3a	LOC107785466;LOC107779358	54	3	29.753			196640000	177000000	158680000	177440000	94335000	150120000	143450000	1.29302e+08	1.37229
Q285L8;A0A1S4A7Q3	40S ribosomal protein S3a	cyc07;LOC107794621	54	1	29.727			34671000	35486000	25648000	31935000	24504000	26167000	25532000	25401000	1.25723
A0A1S4B4L3	40S ribosomal protein S3a	LOC107804483	54	1	29.755			16633000	23491000	20434000	20186000	12976000	20617000	17928000	1.71737e+07	1.1754
A0A1S4A731;A0A1S4DQ51;A0A1S4BGG6	40S ribosomal protein S4	LOC107794405;LOC107832245	57.6	16	29.867			1227100000	1466300000	1340200000	1.34453e+09	642370000	835890000	754980000	7.44413e+08	1.80617
A0A1S3YX02;A0A1S3ZPZ6	40S ribosomal protein S4	LOC107780799;LOC107789333	50.8	1	29.847			0	0	0	0	0	18138000	0	6046000	0
A0A1S3YK35;A0A1S3ZGZ9	40S ribosomal protein S4	LOC107776966;LOC107786652	54.9	2	29.866			0	34848000	0	11616000	0	9321900	4966600	4.76283e+06	2.43888
A0A1S3YQB3	40S ribosomal protein S4	LOC107778484	59.8	1	29.768			0	76164000	34480000	3.68813e+07	0	71434000	0	2.38113e+07	1.5489
A0A1S3ZSJ9;A0A1S4BXG1	40S ribosomal protein S5	LOC107790011	43.5	1	23.325			19950000	21407000	19075000	20144000	18920000	19145000	14781000	1.76153e+07	1.14355
A0A1S4BXT5;A0A1S4BXG8	40S ribosomal protein S5-like	LOC107812924;LOC107812918	48.6	15	23.338			1307200000	1657600000	1515200000	1.49333e+09	913530000	1049100000	1080800000	1.01448e+09	1.47202
A0A1S4AYA1	40S ribosomal protein S5-like	LOC107802477	48.6	2	23.366			49486000	40421000	40386000	43431000	33784000	36603000	32706000	3.43643e+07	1.26384
A0A1S4D5A4;A0A1S3Z3Y7;A0A1S3YPM6;P29345	40S ribosomal protein S6	LOC107826085;LOC107782679	38.2	11	28.319			624230000	781370000	777300000	7.27633e+08	383740000	427990000	459640000	423790000	1.71697
A0A1S4BZ85;A0A1S3YRP9	40S ribosomal protein S6	LOC107813350;LOC107778999	38.2	2	28.347			59221000	77431000	56739000	6.44637e+07	38857000	41106000	46661000	42208000	1.52729
A0A1S3XTF3	40S ribosomal protein S7	LOC107768552	45.5	8	22.049			738780000	788620000	747630000	7.58343e+08	443610000	521850000	484630000	4.83363e+08	1.56889
A0A1S4CWX7;A0A1S3X1Q2;A0A1S3Z906;A0A1S3ZJX5	40S ribosomal protein S7	LOC107823503;LOC107760389	45.5	1	22.064			153390000	143240000	64316000	1.20315e+08	0	0	0	0	#DIV/0!
A0A1S4CZK3;A0A1S4B8B9	40S ribosomal protein S8	LOC107824336;LOC107805570	39.7	9	25.108			303800000	652930000	518380000	4.91703e+08	215500000	223880000	234200000	2.24527e+08	2.18996
A0A1S4A9F9;A0A1S4AZY1	40S ribosomal protein S8	LOC107795150;LOC107803064	38.5	3	24.973			49782000	101000000	83433000	7.80717e+07	18209000	36055000	36453000	30239000	2.58182
A0A1S4CYV3	40S ribosomal protein S8	LOC107824096	30.4	3	25.052			25807000	31953000	32053000	2.99377e+07	0	26617000	22487000	16368000	1.82904
A0A1S3YJQ5;A0A1S3X179	40S ribosomal protein S8	LOC107776903;LOC107760240	32.3	1	24.998			0	0	0	0	0	8181900	0	2727300	0
A0A1S4B907;P49214	40S ribosomal protein S9-2-like	LOC107805765	48.2	11	23.056			800020000	996290000	958850000	9.18387e+08	434610000	542940000	562200000	513250000	1.78936
A0A1S3ZTI1;A0A1S3YYQ3;A0A1S4BMP5;A0A1S3YUW5	40S ribosomal protein S9-2-like	LOC107790316;LOC107781115	48.2	1	23.03			129530000	204790000	162030000	165450000	108710000	99632000	125200000	1.11181e+08	1.48812
A0A1S4DA62;A0A1S4BZJ1;A0A1S3XEH9;A0A1S4C9T3;A0A1S3Y4M0	40S ribosomal protein SA	LOC107827661;LOC107813555	40.2	13	32.227			2520400000	2590800000	2593000000	2.56807e+09	1764100000	2050600000	2104900000	1973200000	1.30147
A0A1S3YJD9	40S ribosomal protein SA	LOC107776807	39.8	1	32.453			182610000	199400000	198280000	193430000	132490000	152710000	174280000	153160000	1.26293
A0A1S4CJS8;A0A1S4DS07	4a-hydroxytetrahydrobiopterin dehydratase	LOC107819572;LOC107832828	25.1	4	23.268			555210000	526400000	429580000	503730000	568140000	540870000	455810000	5.21607e+08	0.965728
A0A1S4AJR9	4-alpha-glucanotransferase	LOC107798208	10.6	6	69.421			90625000	104260000	79952000	9.16123e+07	63735000	80036000	84639000	7.61367e+07	1.20326
A0A1S4AR68;A0A1S4DEZ0	4-alpha-glucanotransferase	LOC107800347	10.6	3	40.1			46675000	41499000	38606000	42260000	34430000	37755000	49219000	40468000	1.04428
A0A1S4B0A2	4-alpha-glucanotransferase	LOC107803132	2.6	1	65.501			17780000	10386000	12055000	13407000	0	12048000	0	4016000	3.3384
A0A1S3ZQN3;A0A1S3XWU5;A0A1S3Y8Y7;A0A1S4AQI0	4-coumarate--CoA ligase	LOC107789300;LOC107769691	7.2	3	67.702			33590000	33391000	25452000	30811000	26587000	23944000	28342000	26291000	1.17192
A0A1S4DS12;A0A1S4AN21;A0A1S3X0C7	4-coumarate--CoA ligase	LOC107832835;LOC107799429	4.3	2	75.936			31093000	16253000	0	15782000	25624000	16897000	24207000	2.22427e+07	0.709537
A0A1S4AJS0;A0A1S4AFE3	4-coumarate--CoA ligase	LOC107798422;LOC107797035	2.4	1	59.086			16448000	18248000	22813000	1.91697e+07	14102000	17513000	16882000	1.61657e+07	1.18583
A0A1S3ZTJ1;A0A1S3ZJF6	4-coumarate--CoA ligase	LOC107790326;LOC107787414	4.7	2	59.538			11924000	0	13689000	8.53767e+06	12010000	0	0	4.00333e+06	2.13264
A0A1S3YGR1;A0A1S4DI91	4-coumarate--CoA ligase	LOC107776019;LOC107830032	1.7	1	78.933			8074700	6692000	7554900	7.44053e+06	0	0	6038000	2.01267e+06	3.69685
A0A1S4BUY6;A0A1S3ZP36	4-coumarate--CoA ligase	LOC107812179;LOC107788905	4	1	60.632			0	0	0	0	0	0	0	0	#DIV/0!
O24145;A0A1S4B252;A0A1S3ZD81;O24146;A0A1S4AFV7;A0A1S3XK13	4-coumarate--CoA ligase 1; 4-coumarate--CoA ligase	4CL1;LOC107803673	7.9	4	59.842			18100000	38331000	32304000	2.95783e+07	42638000	38759000	34805000	38734000	0.763627
A0A1S4ADE2;A0A1S3ZLP8;A0A1S3X2T5;A0A1S3YLB4;A0A1S4B3K2	4-hydroxy-3-methylbut-2-en-1-yl diphosphate synthase (Ferredoxin), chloroplastic	LOC107796388	47.4	33	82.159			3322100000	2845200000	3104400000	3.09057e+09	2458200000	2744700000	2515100000	2.57267e+09	1.20131
A0A1S3XI75	4-hydroxy-3-methylbut-2-enyl diphosphate reductase, chloroplastic-like	LOC107765472	44	17	51.827			1540000000	1435800000	1504400000	1493400000	1761300000	1609600000	1599700000	1.65687e+09	0.90134
A0A1S3X1H5	4-hydroxy-3-methylbut-2-enyl diphosphate reductase, chloroplastic-like	LOC107760258	44	1	51.688			22957000	0	20612000	14523000	0	15563000	18133000	11232000	1.293
A0A1S3XZ03;A0A1S4DE96	4-hydroxy-4-methyl-2-oxoglutarate aldolase	LOC107770371;LOC107828905	44	6	17.621			176730000	187740000	166140000	176870000	232590000	190740000	220460000	2.14597e+08	0.824197
A0A1S4D091;A0A1S4CGZ8	4-hydroxy-4-methyl-2-oxoglutarate aldolase	LOC107824552;LOC107818859	31.3	3	17.767			113980000	97533000	107180000	106231000	134030000	145660000	115530000	131740000	0.806369
A0A1S4BZ69	4-hydroxy-tetrahydrodipicolinate reductase 1, chloroplastic-like	LOC107813436	9.9	3	36.423			26851000	22720000	44594000	3.13883e+07	24556000	29287000	24879000	2.62407e+07	1.19617
Q42948;A0A1S4CWV5;A0A1S3ZEX5	4-hydroxy-tetrahydrodipicolinate synthase, chloroplastic; 4-hydroxy-tetrahydrodipicolinate synthase	DHPS1;LOC107823498	7.5	3	39.576			75955000	86263000	76176000	7.94647e+07	57759000	81964000	68979000	6.95673e+07	1.14227
A0A1S4C5E1;A0A1S3XV39	50S ribosomal protein 5, chloroplastic-like; 50S ribosomal protein 5 alpha, chloroplastic-like	LOC107815096;LOC10776914	23.9	1	16.008			0	0	42405000	14135000	0	0	0	0	#DIV/0!
A0A1S3XDY9	50S ribosomal protein 6, chloroplastic	LOC107764062	8.6	2	11.12			79349000	94915000	80187000	84817000	104620000	74373000	52848000	7.72803e+07	1.09752
O80362;A0A1S3XBY2	50S ribosomal protein L10, chloroplastic	RPL10;LOC107763454	60.8	14	25.413			2187900000	2463700000	2360200000	2.33727e+09	2509300000	2368000000	2498300000	2.45853e+09	0.950675
A0A1S3X8Q5	50S ribosomal protein L10, chloroplastic-like	LOC107762422	60.8	3	25.455			424110000	342600000	312500000	3.59737e+08	424660000	400280000	293250000	372730000	0.96514
A0A1S4C696	50S ribosomal protein L11, chloroplastic-like	LOC107815549	43.6	8	23.12			694890000	729800000	763880000	7.29523e+08	796520000	704320000	774580000	7.58473e+08	0.961831
A0A1S4CC61	50S ribosomal protein L11, chloroplastic-like	LOC107817411	43.6	3	23.133			75183000	119340000	70579000	8.83673e+07	52155000	66722000	68935000	62604000	1.41153
P24929;A0A1S3XSN6;A0A1S3YK84	50S ribosomal protein L12, chloroplastic	RPL12;LOC107768292	59.7	13	19.646			11768000000	11877000000	10510000000	11385000000	12847000000	11740000000	11729000000	1.21053e+10	0.940495
A0A1S3YN45	50S ribosomal protein L12, chloroplastic	LOC107777790	59.7	1	19.686			566720000	635630000	718840000	6.40397e+08	616340000	689580000	595290000	6.33737e+08	1.01051
A0A1S3YRR0	50S ribosomal protein L12, chloroplastic-like	LOC107779056	58.1	6	19.702			1724800000	1663200000	1703300000	1697100000	1773800000	1609100000	1537000000	1.63997e+09	1.03484
A0A1S3Z1T5	50S ribosomal protein L12, chloroplastic-like	LOC107782092	78.1	2	11.045			151980000	135110000	157200000	1.48097e+08	132300000	171200000	164580000	1.56027e+08	0.949175
A0A1S4AY78;A0A1S4CZR9;A0A1S4BGF7	50S ribosomal protein L13, chloroplastic-like	LOC107802615;LOC107824248	36.9	8	27.319			1033000000	1333600000	1175900000	1.18083e+09	657670000	884730000	994790000	845730000	1.39623
A0A1S3Z4N4	50S ribosomal protein L15, chloroplastic-like	LOC107782923	61.8	17	28.488			986240000	1175200000	1011400000	1.05761e+09	948600000	936390000	865710000	916900000	1.15347
A0A1S3XSR0	50S ribosomal protein L15, chloroplastic-like	LOC107768370	61.8	2	28.472			49124000	51509000	48173000	49602000	46572000	48081000	49485000	48046000	1.03239
A0A1S3YUR0;A0A1S3XG28;O80363;A0A1S4CQN2;A0A1S3Y1A8	50S ribosomal protein L17, chloroplastic-like	LOC107779789;LOC107764757	12.4	3	22.44			234680000	348840000	268810000	284110000	161590000	181360000	146780000	1.63243e+08	1.74041
A0A1S3Y1V1	50S ribosomal protein L18, chloroplastic	LOC107771278	40.7	1	17.984			57264000	0	42851000	3.33717e+07	28469000	42611000	44621000	38567000	0.865291
A0A1S4DL03	50S ribosomal protein L18, chloroplastic-like	LOC107830818	31.9	5	23.288			604720000	688310000	619010000	6.37347e+08	625760000	594310000	624280000	6.14783e+08	1.0367
A0A1S3ZKJ8	50S ribosomal protein L19, chloroplastic-like	LOC107787791	37	5	24.203			308950000	372920000	326760000	336210000	250140000	252750000	300110000	2.67667e+08	1.25608
A0A1S4AR30	50S ribosomal protein L19, chloroplastic-like	LOC107800535	33.8	1	24.129			38585000	0	40486000	26357000	0	0	0	0	#DIV/0!
A0A140G1U0	50S ribosomal protein L20	rpl20	14.8	2	15.541			32070000	50050000	39774000	4.06313e+07	21425000	46054000	32869000	3.34493e+07	1.21471
A0A1S4DK32;A0A1S3Z233	50S ribosomal protein L21, chloroplastic-like	LOC107830548;LOC107781915	29.9	5	23.479			624140000	747600000	646650000	6.72797e+08	463900000	588480000	561770000	538050000	1.25044
A0A1S4DQP2;A0A1S3XRS7;A0A1S4CCH0	50S ribosomal protein L22, chloroplastic	LOC107832413;LOC107767990	33	7	21.208			458310000	624630000	524490000	535810000	311530000	426770000	398470000	3.78923e+08	1.41403
A0A1S4CTH6;A0A1S3ZUS7	50S ribosomal protein L22, chloroplastic	LOC107822290;LOC107790705	25.5	1	15.583			75386000	78479000	43936000	6.59337e+07	46705000	63909000	54689000	55101000	1.1966
A0A140G1V6	50S ribosomal protein L22, chloroplastic	rpl22	15.5	3	17.769			55441000	61977000	64147000	6.05217e+07	48848000	63147000	57514000	56503000	1.07112
Q02764;A0A1S3X831;A0A1S3Y3M3;A0A1S4ARQ0	50S ribosomal protein L24, chloroplastic	RPL24;LOC107762137	39	8	20.702			325500000	501510000	474650000	4.33887e+08	356220000	299430000	349540000	3.35063e+08	1.29494
P30155;A0A1S3ZSC3	50S ribosomal protein L27, chloroplastic	RPL27;LOC107789945	21.8	3	19.663			250110000	422030000	412080000	3.61407e+08	209640000	226440000	260180000	2.32087e+08	1.55721
P30956;A0A1S4BC81;A0A1S3WXY7	50S ribosomal protein L28, chloroplastic	RPL28;LOC107806723	17.2	3	16.697			50469000	87794000	78180000	7.21477e+07	43445000	33644000	46945000	4.13447e+07	1.74503
A0A1S4B8V2;A0A1S3ZU94;A0A1S4AMY2;A0A1S4A817	50S ribosomal protein L29, chloroplastic-like	LOC107805721;LOC107790523	37.8	10	18.854			503710000	574290000	560920000	5.46307e+08	490040000	538630000	457110000	495260000	1.10307
O80360;A0A1S4D263;A0A1S4ATF8	50S ribosomal protein L3, chloroplastic (Fragment); 50S ribosomal protein L3, chloroplastic-like	RPL3;LOC107825047	43.6	10	28.369			2127400000	3227900000	2551400000	2.63557e+09	1367000000	1633500000	1726200000	1.57557e+09	1.67277
A0A1S4APT5;A0A1S3YMT8	50S ribosomal protein L31	LOC107799884;LOC107777917	44.2	4	14.576			374170000	458360000	341930000	3.91487e+08	353170000	300780000	317060000	323670000	1.20952
O80361;A0A1S4CCG1	50S ribosomal protein L4, chloroplastic	RPL4;LOC107817573	30.1	1	31.252			122290000	127340000	135910000	1.28513e+08	150920000	155630000	113660000	140070000	0.917494
A0A1S4DD77	50S ribosomal protein L4, chloroplastic-like	LOC107828567	33.3	9	31.284			862900000	1310200000	1014800000	1.06263e+09	723920000	774500000	818130000	7.72183e+08	1.37614
A0A1S3X434	50S ribosomal protein L5, chloroplastic	LOC107761040	54.3	11	29.42			938540000	1056300000	1002800000	9.99213e+08	636410000	775850000	657090000	6.89783e+08	1.44859
A0A1S4DDQ7	50S ribosomal protein L5, chloroplastic-like	LOC107828527	42	1	17.608			33134000	47499000	70879000	50504000	28533000	42308000	35677000	35506000	1.42241
A0A1S4B2Y7	50S ribosomal protein L6, chloroplastic-like	LOC107803875	54.4	13	25.31			637590000	660310000	706200000	6.68033e+08	581350000	548480000	611460000	580430000	1.15093
A0A1S3X1I5;A0A1S4D6B5	50S ribosomal protein L6, chloroplastic-like	LOC107760041	54.6	1	25.303			30394000	35073000	31658000	32375000	36714000	35724000	31216000	3.45513e+07	0.937012
A0A1S4APJ0;A0A1S4CBR5	50S ribosomal protein L9, chloroplastic	LOC107799768;LOC107817294	49	10	21.511			1115800000	1192900000	1062700000	1123800000	1227000000	1138000000	979970000	1114990000	1.0079
A0A1S4ATW2;A0A1S4AP83;A0A1S3XTZ5;A0A1S4BSJ3;A0A1S3ZRY9	5-adenylylsulfate reductase 1, chloroplastic-like; 5-adenylylsulfate reductase 3, chloroplastic-like isoform X1	LOC107801230	20.2	1	51.122			42917000	0	0	1.43057e+07	0	43911000	0	14637000	0.977363
A0A1S4DHJ8	5-adenylylsulfate reductase 2, chloroplastic-like	LOC107829885	20.2	8	51.172			243860000	250870000	163180000	2.19303e+08	349240000	318600000	315340000	3.27727e+08	0.669165
A0A1S4C1G7;A0A1S4AT60	5-deoxynucleotidase	LOC107814067;LOC107800937	13.4	2	19.224			30229000	14454000	20747000	21810000	16849000	8853500	22235000	1.59792e+07	1.3649
A0A1S4C0U1;A0A1S3ZLV8	5-formyltetrahydrofolate cyclo-ligase-like protein COG0212; 5-formyltetrahydrofolate cyclo-ligase-like protein COG0212 isoform X1	LOC107813891	7.8	1	19.09			0	0	0	0	0	0	0	0	#DIV/0!
A0A1S4D9K9	5-methyltetrahydropteroyltriglutamate--homocysteine S-methyltransferase	LOC107827442	70.3	49	84.578			30297000000	32250000000	32065000000	3.15373e+10	34537000000	33099000000	32869000000	3.35017e+10	0.941366
A0A1S3XCV6	5-methyltetrahydropteroyltriglutamate--homocysteine S-methyltransferase	LOC107763602	69.3	19	84.477			2549000000	2475300000	2701600000	2575300000	2690700000	2636600000	2720800000	2682700000	0.959966
A0A1S4AHL1	5-methyltetrahydropteroyltriglutamate--homocysteine S-methyltransferase	LOC107797732	65.5	8	84.586			1754200000	1749200000	1664800000	1.72273e+09	1790800000	1798100000	1827900000	1805600000	0.954106
A0A1S3ZYM9	5-methyltetrahydropteroyltriglutamate--homocysteine S-methyltransferase	LOC107791827	66.4	7	84.504			703410000	759370000	791620000	7.51467e+08	765370000	821730000	828590000	805230000	0.933232
A0A1S4BRD0	5-methyltetrahydropteroyltriglutamate--homocysteine S-methyltransferase	LOC107811094	64.4	4	84.678			406410000	391960000	344390000	380920000	377020000	375530000	393880000	3.82143e+08	0.996799
A0A1S3XSP4	5-methyltetrahydropteroyltriglutamate--homocysteine S-methyltransferase	LOC107768359	67.1	2	84.671			51216000	51566000	41439000	4.80737e+07	55128000	42688000	52661000	50159000	0.958426
A0A1S3XWH6	5-methylthioadenosine/S-adenosylhomocysteine nucleosidase	LOC107769361	6.3	2	38.981			39619000	28556000	34671000	34282000	36743000	39627000	42608000	3.96593e+07	0.864412
A0A1S3Y3C4;A0A1S4B0C8	5-methylthioadenosine/S-adenosylhomocysteine nucleosidase 2-like	LOC107771706	20.2	4	28.022			272460000	288440000	265750000	275550000	275160000	358630000	252550000	2.95447e+08	0.932656
A0A1S4BHF0;A0A1S4DA77;A0A1S4CXX0	5-nucleotidase domain-containing protein 4-like isoform X1; cytosolic purine 5-nucleotidase-like isoform X1	LOC107808313	14.4	7	71.475			113340000	103740000	128500000	1.15193e+08	125230000	114050000	108240000	115840000	0.994418
A0A1S4B1K7;A0A1S3Z195	5-oxoprolinase-like	LOC107803589;LOC107781908	4.7	5	137.9			10320000	4095800	0	4.80527e+06	0	5237400	0	1745800	2.75247
Q5ZQU1;A0A1S4BW60;A0A1S4ANL1;A0A1S3WZD6;A0A1S4A2V1	6,7-dimethyl-8-ribityllumazine synthase	LOC107761937;LOC107812499	7.9	3	24.422			35234000	63567000	58342000	52381000	15037000	30751000	31277000	2.56883e+07	2.0391
A0A1S3ZEB9	60S acidic ribosomal protein P0	LOC107785919	32.1	9	34.186			1031300000	967650000	971690000	9.90213e+08	819510000	981760000	837790000	8.79687e+08	1.12564
A0A1S3Y5V8;A0A1S4AV90;A0A1S4BZQ0	60S acidic ribosomal protein P0	LOC107772468	31.9	2	34.081			208170000	239150000	149580000	1.98967e+08	184140000	242010000	225820000	2.17323e+08	0.915533
A0A1S4D3Y1;A0A1S3Z2P9;A0A1S4CUG0	60S acidic ribosomal protein P1-like	LOC107825752;LOC107782341	36.6	2	11.398			1157500000	1107500000	1011400000	1.09213e+09	988660000	527410000	1205000000	9.07023e+08	1.20409
A0A1S3XQG2	60S acidic ribosomal protein P1-like	LOC107767644	36	1	11.508			72473000	62381000	10321000	4.83917e+07	67570000	11143000	31083000	3.65987e+07	1.32222
A0A1S3X6F5	60S acidic ribosomal protein P1-like	LOC107761577	36.6	1	11.364			53696000	60287000	61839000	5.86073e+07	51884000	71500000	57936000	60440000	0.969678
A0A1S4AZ85	60S acidic ribosomal protein P1-like	LOC107802904	36.9	1	11.281			0	7279100	0	2.42637e+06	5036000	0	8710800	4.58227e+06	0.529512
A0A1S3Y124	60S acidic ribosomal protein P2-1-like	LOC107770879	72.6	4	11.344			193820000	136890000	144880000	158530000	181510000	154790000	164590000	1.66963e+08	0.94949
A0A1S3XMA7	60S acidic ribosomal protein P2-2-like	LOC107766732	10.8	2	11.251			478250000	377780000	341840000	399290000	463280000	392570000	332400000	3.96083e+08	1.0081
A0A1S4BJ93	60S acidic ribosomal protein P2-2-like	LOC107808872	47.3	2	11.331			64929000	61214000	66246000	6.41297e+07	52536000	37236000	45893000	4.52217e+07	1.41812
A0A1S3YY25	60S acidic ribosomal protein P2A-like	LOC107780915	71.1	4	11.402			377160000	416940000	341300000	3.78467e+08	449790000	201470000	329610000	3.26957e+08	1.15754
A0A1S4AKW7	60S acidic ribosomal protein P2A-like	LOC107798744	69.4	5	11.273			409110000	317690000	331310000	3.52703e+08	331250000	322740000	320630000	3.24873e+08	1.08566
A0A1S4C503	60S acidic ribosomal protein P2A-like	LOC107815227	29.5	2	11.456			125130000	134360000	112920000	1.24137e+08	168680000	117980000	116620000	1.34427e+08	0.923453
A0A1S3Y0Y1	60S acidic ribosomal protein P2A-like	LOC107771057	31.2	3	11.457			74716000	79752000	65897000	73455000	81543000	61734000	65095000	6.94573e+07	1.05756
A0A1S4CPG9;A0A1S4C137	60S acidic ribosomal protein P3-like	LOC107821001;LOC107814057	26.4	3	12.082			263850000	268900000	239170000	2.57307e+08	229060000	252250000	227760000	2.36357e+08	1.08864
A0A1S3Z462;A0A1S3XK37;A0A1S3YPT0;A0A1S3Z2D7;Q40592;A0A1S4C2I7;A0A1S3ZLN5	60S ribosomal protein L10; 60S ribosomal protein L10-like	LOC107782598;LOC107766087	21.5	5	24.791			413830000	473160000	384170000	423720000	227810000	259900000	229780000	2.39163e+08	1.77168
Q9FSF6;A0A1S4CT55;A0A1S3ZDW5;A0A1S3ZDJ6;A0A1S3XAW1;A0A1S4CRQ0	60S ribosomal protein L11-1-like (Fragment); 60S ribosomal protein L11-1-like	rbl11-like;LOC107822394	27.1	7	20.774			895850000	1025500000	983780000	9.68377e+08	541290000	665190000	597970000	6.01483e+08	1.60998
A0A1S3XES7;A0A1S3XCQ9	60S ribosomal protein L12-like; 60S ribosomal protein L12	LOC107764287;LOC107763560	66.3	10	17.805			2659300000	2383200000	2440000000	2.49417e+09	2808600000	2356600000	2529600000	2.56493e+09	0.97241
A0A1S4CSN1;A0A1S3XYQ4;P49627;A0A1S3XPA0	60S ribosomal protein L13	LOC107822051;LOC107770287	45.1	8	23.542			500180000	701880000	556870000	586310000	269340000	388770000	360470000	3.39527e+08	1.72685
A0A1S3XLC6;A0A1S3XGB4	60S ribosomal protein L13	LOC107766512;LOC107764897	31.6	1	23.665			44515000	39645000	52237000	4.54657e+07	19194000	32798000	34501000	28831000	1.57697
A0A1S4B8Z8;A0A1S4AZ17	60S ribosomal protein L13	LOC107805709;LOC107802841	35.4	1	23.648			0	13255000	0	4.41833e+06	0	0	0	0	#DIV/0!
A0A1S4CZ05	60S ribosomal protein L13a-4-like	LOC107824149	48.1	10	23.529			601840000	658800000	574030000	6.11557e+08	351250000	415790000	393170000	3.86737e+08	1.58133
A0A1S4AL36	60S ribosomal protein L13a-4-like	LOC107798858	39.3	1	23.499			7459200	0	10633000	6.03073e+06	0	0	0	0	#DIV/0!
A0A1S4DDA2;A0A1S3XU40	60S ribosomal protein L13a-4-like; 60S ribosomal protein L13a-1	LOC107828558;LOC107768819	34.5	1	23.519	+		0	11835000	17463000	9766000	0	0	0	0	#DIV/0!
A0A1S3Z662;A0A1S4DN49	60S ribosomal protein L13a-4-like; 60S ribosomal protein L13a-4	LOC107783495;LOC107831576	48.1	1	23.531	+		58462000	121740000	61111000	8.04377e+07	42318000	52906000	52236000	4.91533e+07	1.63646
A0A1S4A807;A0A1S4B9L9;A0A1S3Y6S7	60S ribosomal protein L14-1; 60S ribosomal protein L14-2-like	LOC107794709;LOC107806021	31.3	5	15.412			139150000	321790000	151870000	204270000	81065000	119560000	115870000	1.05498e+08	1.93624
A0A1S4DF55	60S ribosomal protein L18-2-like	LOC107829149	34.2	6	20.858			284690000	430090000	311330000	3.42037e+08	158040000	207630000	205640000	1.90437e+08	1.79607
A0A1S4DJT5;A0A1S4D9B3;A0A1S4BG12;A0A1S4DGS4	60S ribosomal protein L18-2-like	LOC107830489;LOC107827387	27.3	1	20.878			10908000	27367000	0	1.27583e+07	0	0	0	0	#DIV/0!
A0A1S4D1U0	60S ribosomal protein L18a	LOC107825032	48.3	10	21.453			429620000	630520000	470250000	510130000	266360000	329890000	312950000	3.03067e+08	1.68323
A0A1S3ZW93;A0A1S3YEM1;A0A1S3XCW6;A0A1S3WY23;A0A1S3Z895	60S ribosomal protein L21-2-like; 60S ribosomal protein L21-1-like isoform X1	LOC107791104;LOC107775385	26.8	5	18.7			363660000	460910000	351900000	3.92157e+08	231220000	285480000	266900000	261200000	1.50137
A0A1S4CRJ1;A0A1S3WYG1	60S ribosomal protein L22-3-like	LOC107821754;LOC107759189	20	2	14.047			154880000	148770000	144790000	149480000	97690000	118810000	118860000	1.11787e+08	1.33719
Q07760;A0A1S3XSQ1	60S ribosomal protein L23	RPL23;LOC107768301	45	5	14.989			218110000	221670000	223610000	221130000	163800000	163560000	172560000	166640000	1.32699
Q07761;A0A1S4DDT0;A0A1S4CRI5;A0A1S4B712;A0A1S4AEM2;A0A1S3Y8M9;A0A1S3Y2N8;A0A1S3XDG3	60S ribosomal protein L23a; 60S ribosomal protein L23a-like	RPL23A;LOC107828734	33.8	7	17.281			660050000	1076700000	798940000	845230000	608840000	673890000	589420000	624050000	1.35443
A0A1S4DRS8;A0A1S4CDT0;A0A1S3Z7P8;A0A1S3XI07	60S ribosomal protein L23-like; 60S ribosomal protein L23-like isoform X1	LOC107832772;LOC107817927	45	1	15.015			0	10851000	0	3617000	0	0	0	0	#DIV/0!
A0A1S4DPX6;A0A1S4BHF2;A0A1S4B7M1;A0A1S4B380	60S ribosomal protein L24; 60S ribosomal protein L24-like	LOC107832170;LOC107808292	19.5	3	18.517			263680000	442300000	288030000	3.31337e+08	181890000	191620000	244910000	206140000	1.60734
A0A1S4DFG6;A0A1S4CC07	60S ribosomal protein L26-1	LOC107829238	34.2	5	16.752			220480000	316790000	277670000	2.71647e+08	143060000	154140000	146800000	148000000	1.83545
A0A1S4DPM5;A0A1S4D5V1;A0A1S4AFX3	60S ribosomal protein L26-1-like	LOC107831809;LOC107826309	26.7	1	16.708			36929000	59747000	43394000	46690000	21913000	27713000	21765000	23797000	1.96201
A0A1S4AEL0;A0A1S3XBV7;A0A1S4BRQ5	60S ribosomal protein L27	LOC107796761;LOC107763424	43.7	6	15.685			479650000	483220000	436050000	4.66307e+08	145160000	303720000	210560000	2.19813e+08	2.12138
A0A1S4AZC1;A0A1S3X0H8	60S ribosomal protein L27	LOC107802935;LOC107759969	30.4	2	15.684			67340000	93862000	44369000	6.85237e+07	26534000	33533000	32808000	3.09583e+07	2.21342
A0A1S4DCJ5;A0A1S3YRJ8	60S ribosomal protein L27a-3-like	LOC107828389;LOC107779018	23.6	4	16.411			166880000	246520000	221090000	2.11497e+08	93485000	119100000	118160000	1.10248e+08	1.91837
A0A1S4BFD5	60S ribosomal protein L27a-3-like	LOC107807693	16.9	1	16.538			50890000	47644000	43841000	4.74583e+07	25622000	20980000	24403000	2.36683e+07	2.00514
A0A1S4D1U6	60S ribosomal protein L28-1-like	LOC107824985	42.7	7	15.922			290550000	332430000	320760000	314580000	274370000	271800000	213160000	253110000	1.24286
A0A1S3ZZ60;A0A1S4BM69	60S ribosomal protein L28-1-like	LOC107792010	21	1	15.792			49146000	57473000	57408000	5.46757e+07	44520000	40399000	39314000	41411000	1.32032
A0A1S3XYH8	60S ribosomal protein L30	LOC107770030	43.8	5	12.375			94100000	123610000	102080000	1.06597e+08	0	31645000	34493000	22046000	4.83519
A0A1S3WZ09;A0A1S4BX27;A0A1S4AG75	60S ribosomal protein L30-like	LOC107759448;LOC107812690	32.7	1	12.398	+		17298000	57947000	24865000	33370000	0	10111000	15450000	8.52033e+06	3.91651
A0A1S3X2T9;A0A1S3ZFD2;A0A1S3YCA9;A0A1S3Z670	60S ribosomal protein L30-like	LOC107760678;LOC107786065	43.8	1	12.434			0	0	0	0	0	0	0	0	#DIV/0!
A0A1S4A6K0;A0A1S3Y3V5;A0A1S4C2I0;A0A1S3YWJ6	60S ribosomal protein L31-like; 60S ribosomal protein L31	LOC107794303;LOC107771890	20.8	4	13.888			547800000	609880000	596630000	584770000	445020000	424980000	435290000	4.35097e+08	1.344
A0A1S3Z2X4	60S ribosomal protein L32-1	LOC107782359	33.8	1	15.628			0	19987000	20308000	1.34317e+07	9899700	16924000	0	8.94123e+06	1.50222
A0A1S4DBA5;A0A1S4D6G1	60S ribosomal protein L32-1-like	LOC107827982;LOC107826407	35.3	4	15.543			192500000	299140000	232130000	2.41257e+08	182140000	142600000	164440000	163060000	1.47956
A0A1S3XU76;A0A1S3XQI4	60S ribosomal protein L3-2-like; 60S ribosomal protein L3-2	LOC107768788;LOC107767586	29.8	4	44.436			104110000	129820000	105550000	113160000	52604000	49290000	52162000	51352000	2.20361
P41098;A0A1S3ZF75;A0A1S3XUR7;A0A1S3XBT8;A0A1S4CB80;A0A1S4CM46;A0A1S3X839;A0A1S4CTG8;A0A1S3Y2K6	60S ribosomal protein L34; 60S ribosomal protein L34-like	RPL34;LOC107786154	33.3	4	13.752			412930000	606700000	474470000	4.98033e+08	213060000	307840000	310590000	2.77163e+08	1.79689
A0A1S4DCB9;A0A1S4AMT9;A0A1S4AHL7;A0A1S3XU79	60S ribosomal protein L35a-3-like	LOC107828320;LOC107799355	43.8	5	12.917			316600000	369420000	287140000	3.24387e+08	166020000	234860000	244060000	214980000	1.50892
A0A1S4DLA0;A0A1S4ASD5;A0A1S4CML0;A0A1S3YXG7;A0A1S3WY31;A0A1S4CTP0;A0A1S3XD09;A0A1S3YFW2	60S ribosomal protein L35-like	LOC107830981;LOC107800781	45.5	7	14.341			356160000	581020000	440050000	4.59077e+08	160490000	215040000	206560000	194030000	2.36601
A0A1S4A451	60S ribosomal protein L36	LOC107793582	30.6	4	12.097			95713000	176190000	154850000	142251000	60527000	67668000	68031000	6.54087e+07	2.1748
A0A1S3XME8	60S ribosomal protein L36	LOC107766767	30.6	1	12.059			0	19491000	14213000	1.12347e+07	0	0	0	0	#DIV/0!
A0A1S3X5Y9;A0A1S3XZR6	60S ribosomal protein L37a; 60S ribosomal protein L37a-like	LOC107761416;LOC107770536	35.9	3	10.257			254640000	485520000	445840000	3.95333e+08	154320000	224910000	208750000	1.95993e+08	2.01708
A0A1S4C4G8;A0A1S3ZIU7	60S ribosomal protein L38; 60S ribosomal protein L38-like	LOC107815038;LOC107787227	36.2	2	8.0836			65449000	100880000	67895000	7.80747e+07	50884000	66812000	70913000	6.28697e+07	1.24185
A0A1S4AM54;A0A1S3YR32	60S ribosomal protein L39-like; 60S ribosomal protein L39-3	LOC107799127;LOC107778797	22.7	1	5.6557			0	26522000	21095000	1.58723e+07	0	0	0	0	#DIV/0!
A0A1S3XUE1	60S ribosomal protein L3-like	LOC107768851	31.4	1	44.408			23858000	29042000	28421000	27107000	17688000	17146000	16550000	17128000	1.58261
A0A1S4B1N5;A0A1S3ZLI9	60S ribosomal protein L3-like; 60S ribosomal protein L3	LOC107803515;LOC107788247	36	17	44.427			1123300000	1646300000	1188800000	1.31947e+09	693960000	794730000	812020000	7.66903e+08	1.72051
A0A1S3ZXG7	60S ribosomal protein L4	LOC107791521	52.3	2	41.886			21186000	24107000	24891000	2.33947e+07	9805000	0	8854600	6.21987e+06	3.76128
A0A1S4A975	60S ribosomal protein L4-1-like	LOC107795127	48.1	3	44.774			168350000	254440000	199770000	207520000	110690000	137360000	130390000	1.26147e+08	1.64507
A0A1S3YUH0	60S ribosomal protein L4-1-like	LOC107779688	46.9	1	44.688			57030000	49483000	47466000	5.13263e+07	36508000	36514000	42737000	3.85863e+07	1.33017
A0A1S4BXJ6;A0A1S4AVP7	60S ribosomal protein L44-like; 60S ribosomal protein L44	LOC107812846;LOC107801799	18.1	2	10.882			43229000	73840000	63535000	6.02013e+07	50392000	37916000	35454000	41254000	1.45928
A0A1S4BWA4;A0A1S3X0M5	60S ribosomal protein L4-like	LOC107812501;LOC107759872	62.5	23	44.71			1838300000	2348200000	1749600000	1978700000	982380000	1245800000	1131500000	1.11989e+09	1.76686
A0A1S4CEU0	60S ribosomal protein L4-like	LOC107818213	46.9	4	44.763			128550000	141190000	152770000	1.40837e+08	74451000	62463000	76158000	71024000	1.98294
A0A1S3XE16	60S ribosomal protein L5-like	LOC107764090	40.9	12	34.565			473790000	630610000	533230000	5.45877e+08	373800000	368940000	320610000	354450000	1.54007
A0A1S4A8K0	60S ribosomal protein L5-like	LOC107794917	14	1	34.45			34796000	28371000	22430000	2.85323e+07	20712000	25572000	24100000	2.34613e+07	1.21614
A0A1S4B5C2	60S ribosomal protein L5-like	LOC107804665	24.5	2	34.783			23503000	30690000	22416000	2.55363e+07	31381000	23262000	24981000	2.65413e+07	0.962135
A0A1S3ZFB6	60S ribosomal protein L5-like	LOC107786115	35.9	1	34.569			18451000	22067000	21360000	20626000	0	21105000	0	7035000	2.93191
A0A1S4A6I3;A0A1S3ZFM5;A0A1S3X3Z4	60S ribosomal protein L6-like	LOC107794249;LOC107786144	32.3	6	25.364			250540000	470420000	328710000	349890000	124850000	172160000	173980000	1.56997e+08	2.22865
A0A1S4CJM5	60S ribosomal protein L6-like	LOC107819793	31.9	2	25.349			40294000	63789000	64392000	5.61583e+07	25004000	33760000	42289000	3.36843e+07	1.66719
A0A1S4D5C4;A0A1S4A5Z2;A0A1S3Z4R0	60S ribosomal protein L7-2-like; 60S ribosomal protein L7-4-like	LOC107826102;LOC107794124	36.4	2	28.053			66288000	92102000	72688000	77026000	43734000	42041000	50110000	45295000	1.70054
A0A1S4ALX4;A0A1S4C1Q2	60S ribosomal protein L7-4-like	LOC107799086;LOC107814165	38.8	10	27.93			496800000	596500000	529600000	5.40967e+08	269400000	377650000	350110000	3.32387e+08	1.62752
A0A1S4BLB0;A0A1S3ZRL4;A0A1S4D668;A0A1S4CD07	60S ribosomal protein L7a	LOC107809517;LOC107789676	40.5	12	29.183			480500000	863460000	679900000	674620000	258800000	349950000	316480000	308410000	2.18741
A0A1S4AF36;A0A1S4C8T7;A0A1S3ZD03;P25998	60S ribosomal protein L8; 60S ribosomal protein L8-like	LOC107796773;LOC107816448	44.6	10	28.185			469750000	705940000	547290000	5.74327e+08	280660000	278210000	257780000	2.72217e+08	2.10981
A0A1S3XXQ5;A0A1S3XAI6;REV__A0A1S4CKG7	60S ribosomal protein L8-like	LOC107769978	41.9	3	28.16			38696000	71506000	42114000	50772000	0	0	0	0	#DIV/0!
A0A1S4AYN5	60S ribosomal protein L9-1	LOC107802737	68	13	21.975			1840900000	1872000000	2075900000	1929600000	1176300000	1407700000	1390400000	1324800000	1.45652
A0A1S4CJ62;A0A1S3XV78	60S ribosomal protein L9-1-like	LOC107819630;LOC107769103	67	2	22.016			64544000	64244000	61436000	63408000	38051000	51295000	51965000	4.71037e+07	1.34614
A0A1S4C068	60S ribosomal protein L9-1-like	LOC107813756	59.3	1	22.016			0	0	19931000	6.64367e+06	0	0	0	0	#DIV/0!
Q9FEV9;A0A1S3XKT6;Q9FEV7;Q9FEV8	65-kDa microtubule-associated protein 1-like	map65-1a;LOC107766346	9.7	5	65.259			46528000	36296000	42450000	41758000	42201000	37716000	36743000	3.88867e+07	1.07384
A0A1S4AI79;A0A1S4BUC4	66 kDa stress protein-like	LOC107797995;LOC107811990	21.7	8	66.041			122300000	139530000	153630000	1.38487e+08	113100000	128210000	137270000	1.26193e+08	1.09742
A0A1S3ZGA0;A0A1S3XPT7;A0A1S3XAM2	6-phosphofructo-2-kinase/fructose-2, 6-bisphosphatase-like	LOC107786367	8.7	5	83.165			37085000	34060000	39500000	3.68817e+07	39502000	56407000	37085000	4.43313e+07	0.831955
A0A1S3ZWY7	6-phosphogluconate dehydrogenase, decarboxylating	LOC107791333	42.4	18	54.244			1060700000	1153500000	1077800000	1.09733e+09	854380000	970840000	1081600000	968940000	1.13251
A0A1S4ALE9;A0A1S3ZRQ6;A0A1S4DBW0;A0A1S3YVQ3	6-phosphogluconate dehydrogenase, decarboxylating	LOC107799009;LOC10	40.6	13	53.452			550270000	615620000	542260000	5.69383e+08	372880000	477810000	464360000	438350000	1.29892
A0A139ZSG9	6-phosphogluconate dehydrogenase, decarboxylating	LOC107779182	26.4	1	53.295			72091000	32879000	39207000	48059000	22535000	36892000	40173000	33200000	1.44756
A0A1S3YKL6	6-phosphogluconate dehydrogenase, decarboxylating	LOC107777046	39	1	54.256			23151000	17618000	23646000	2.14717e+07	19502000	19944000	0	1.31487e+07	1.63299
A0A1S4DP80	7,8-dihydroneopterin aldolase	LOC107831961	25.5	3	18.013			30533000	37237000	32775000	33515000	35645000	35652000	45467000	3.89213e+07	0.861096
A0A1S3XCH2	7,8-dihydroneopterin aldolase	LOC107763556	28.5	1	15.941			18215000	0	0	6.07167e+06	16416000	10802000	0	9.07267e+06	0.669226
A0A1S4AUY8;A0A1S3XXK7	7-dehydrocholesterol reductase-like	LOC107801501;LOC107769866	3	1	49.768			21475000	22838000	17470000	2.05943e+07	19039000	20168000	14484000	17897000	1.15071
A0A1S3Y8R3	8-hydroxygeraniol dehydrogenase-like	LOC107773552	44	15	38.692			1541700000	1549900000	1429200000	1.50693e+09	1105000000	1308300000	1220800000	1.21137e+09	1.24399
A0A1S3Y6T9;A0A1S3Y7G1	8-hydroxygeraniol dehydrogenase-like	LOC107772795;LOC107772996	4.9	1	21.675			17438000	23327000	21068000	20611000	22432000	21431000	23631000	22498000	0.916126
A0A1S4DMS2;A0A1S4BT70	ABC transporter B family member 26, chloroplastic-like isoform X1; ABC transporter B family member 26, chloroplastic	LOC107831222	2.5	1	48.783			0	0	0	0	0	0	0	0	#DIV/0!
A0A1S3ZXK8;A0A1S3Y0Y0;A0A1S4D305;A0A1S4DBI4	ABC transporter B family member 28-like; ABC transporter B family member 28-like isoform X1	LOC107791508;LOC107770825	2.4	2	79.004			0	0	0	0	13461000	0	0	4487000	0
A0A1S4AL74;A0A1S4ATD8	ABC transporter D family member 2, chloroplastic-like; ABC transporter D family member 2, chloroplastic-like isoform X1	LOC107798686	1.8	1	80.249			15962000	15151000	12642000	14585000	11751000	16243000	12806000	13600000	1.07243
A0A1S4CKF8;A0A1S4A439	ABC transporter E family member 2; ABC transporter E family member 2-like	LOC107819992;LOC107793476	7.6	4	68.119			39858000	67334000	34274000	4.71553e+07	25558000	38160000	35105000	32941000	1.43151
A0A1S4AD21;A0A1S4AA04;A0A1S3ZSW9;A0A1S3ZMY5	ABC transporter F family member 1; ABC transporter F family member 1-like	LOC107796266;LOC107795359	11	5	67.322			83220000	96603000	85915000	8.85793e+07	71514000	75112000	81663000	7.60963e+07	1.16404
A0A1S4BIN6;A0A1S4B834	ABC transporter F family member 3-like	LOC107808702;LOC107805430	6.3	3	80.375			60913000	66654000	67761000	6.51093e+07	52911000	79702000	35125000	5.59127e+07	1.16448
A0A1S4A018;A0A1S3Y7P1;A0A1S4CU43;A0A1S4CMC7	ABC transporter F family member 4-like	LOC107792231;LOC107773299	11.3	4	80.813			29927000	29686000	30022000	2.98783e+07	27530000	0	103900000	43810000	0.681998
A0A1S4C2P9;A0A1S3XP93	ABC transporter F family member 5-like	LOC107814438;LOC107767303	2.2	1	78.617			21441000	22423000	19855000	2.12397e+07	12639000	13238000	14248000	13375000	1.58801
A0A1S4C044;A0A1S4AUD7	ABC transporter I family member 19-like	LOC107813735;LOC107801396	4.9	1	32.107			0	0	0	0	0	0	0	0	#DIV/0!
A0A1S3ZX51	ABC transporter I family member 6, chloroplastic-like	LOC107791386	14.4	4	34.861			388960000	345050000	320590000	3.51533e+08	370800000	336350000	322160000	3.43103e+08	1.02457
A0A1S4AY83;A0A1S4A0B6	ABC transporter I family member 6, chloroplastic-like	LOC107802622	9.1	2	34.862			48387000	55912000	64294000	5.61977e+07	50284000	65183000	74820000	63429000	0.885993
A0A1S4A0R2;A0A1S4A2P0;A0A1S4B1T1	ABC-type xenobiotic transporter	LOC107792562;LOC107793093	2.6	3	129.22			18601000	21329000	19789000	1.99063e+07	0	0	24015000	8005000	2.48674
A0A1S3X946;A0A1S4BYT0	abscisic acid receptor PYR1-like	LOC107762606;LOC107813322	6.3	1	24.628			10511000	21997000	19316000	1.72747e+07	0	0	0	0	#DIV/0!
A0A1S3Z511;A0A1S3X1A3	abscisic stress-ripening protein 2-like	LOC107782875;LOC107760195	11.6	1	12.797			0	0	0	0	10045000	0	0	3.34833e+06	0
A0A1S4BJM1;A0A1S3XCI7;A0A1S3ZKA0;A0A1S4BCD2;A0A1S3ZWL7	acetate/butyrate--CoA ligase AAE7, peroxisomal-like	LOC107809019;L	20	4	32.902			69480000	64397000	66056000	6.66443e+07	50798000	72765000	60976000	61513000	1.08342
A0A1S4BDR4	Acetohydroxy-acid synthase small subunit	LOC107807238	11.5	4	52.591			136780000	113750000	158060000	1.36197e+08	110190000	91545000	86729000	9.61547e+07	1.41643
A0A1S3XZ80;A0A1S3Z1N7;A0A1S4CXE5	Acetohydroxy-acid synthase small subunit	LOC107770361;LOC107782028	10.6	2	50.244			21248000	18541000	0	13263000	0	0	18602000	6.20067e+06	2.13896
P09114;A0A1S4APB5;P09342;A0A1S4C1K3;A0A1S3ZJD8	Acetolactate synthase 2, chloroplastic; Acetolactate synthase	ALS;LOC107799742	20.9	12	72.417			209070000	237970000	236070000	2.27703e+08	144320000	164220000	171520000	160020000	1.42297
A0A1S3XET2;A0A1S4AM37;A0A1S3ZL45	acetylajmalan esterase-like	LOC107764291	12.8	4	42.615			480160000	440580000	576990000	4.99243e+08	675910000	630020000	537500000	6.14477e+08	0.812469
A0A1S3XA86	acetylajmalan esterase-like	LOC107762940	11	2	42.412			41245000	42122000	42200000	4.18557e+07	43049000	57190000	40396000	4.68783e+07	0.892857
A0A1S4DDL6	acetylajmalan esterase-like	LOC107828499	13.6	2	41.809			27432000	27307000	22871000	25870000	26026000	35267000	25413000	28902000	0.895094
A0A1S3ZHV4;A0A1S3ZEG2	acetylajmalan esterase-like; acetylajmalan esterase-like isoform X1	LOC107787026;LOC107785815	11.4	2	25.364			0	30124000	37449000	2.25243e+07	41852000	46860000	36997000	41903000	0.537535
A0A1S4CHI1;Q5XMB8;A0A1S4CHD8	acetyl-CoA acetyltransferase, cytosolic 1-like; Cytosolic acetoacetyl-coenzyme A thiolase	LOC107819092;AACT1	39.6	12	41.268			346570000	321390000	384080000	350680000	303370000	340450000	327240000	3.23687e+08	1.08339
A0A1S3ZRL0;A0A1S3ZA50;A0A1S4A3W1;A0A1S3X5J0;A0A1S4AGM3	Acetyl-CoA carboxylase	LOC107789614;LOC107784654	1.9	3	256.4			0	15890000	17020000	10970000	0	0	18796000	6.26533e+06	1.7509
A0A1S3ZDU3	Acetyl-CoA carboxytransferase	LOC107785788	25.8	17	84.893			524510000	565180000	522080000	5.37257e+08	406730000	476710000	442100000	4.41847e+08	1.21593
A0A1S4D555;A0A1S3ZAL2	Acetyl-CoA carboxytransferase	LOC107826042;LOC107784825	9.8	5	80.917			20074000	35628000	36575000	30759000	23976000	0	22500000	15492000	1.98548
A0A1S3ZQ73	Acetyl-CoA carboxytransferase	LOC107789406	24.2	1	84.854	+		11188000	14586000	19884000	1.52193e+07	0	13223000	13020000	8.74767e+06	1.73982
A0A140G1S4	Acetyl-coenzyme A carboxylase carboxyl transferase subunit beta	accD	16.6	8	58.472			315980000	267380000	287520000	2.90293e+08	221050000	221820000	254990000	232620000	1.24793
A0A1S3Y8L1;A0A1S4CGZ4;A0A1S4D717;A0A1S4DIK0;A0A1S3XD13	acetyl-coenzyme A synthetase, chloroplastic/glyoxysomal-like isoform X1	LOC107773513	4	3	86.073			41483000	47383000	45525000	44797000	28230000	38396000	40857000	3.58277e+07	1.25035
A0A1S4CAK0;A0A1S4B1A9	acetylglutamate kinase, chloroplastic-like	LOC107816907;LOC107803486	14.4	4	36.362			99383000	833890000	801920000	5.78398e+08	112790000	116430000	121700000	1.16973e+08	4.9447
A0A1S3Z1U0;A0A1S3YGE8	acetylornithine deacetylase; acetylornithine deacetylase-like	LOC107782094;LOC107775751	5.7	2	48.574			0	21039000	15025000	1.20213e+07	16356000	13768000	14393000	14839000	0.810117
A0A1S4CAZ7	Acetylornithine transaminase	LOC107817050	45.2	16	50.038			1077600000	1092000000	1184100000	1117900000	1337200000	1258400000	1197800000	1.26447e+09	0.884088
A0A1S3ZLM2	Acetylornithine transaminase	LOC107788032	43.2	2	50.127			64107000	58814000	65059000	62660000	25849000	22277000	25437000	24521000	2.55536
A0A1S3Y542	Acetyltransferase component of pyruvate dehydrogenase complex	LOC107772318	29.9	13	58.923			413860000	405440000	391660000	4.03653e+08	358430000	376070000	386550000	3.73683e+08	1.0802
A0A1S3XS80	Acetyltransferase component of pyruvate dehydrogenase complex	LOC107768212	29.4	3	58.855			77436000	69261000	70497000	72398000	75908000	80844000	83030000	7.99273e+07	0.905798
A0A1S3ZLY0	Acetyltransferase component of pyruvate dehydrogenase complex	LOC107788125	26.7	3	58.394			30932000	43880000	51287000	42033000	47636000	0	21438000	2.30247e+07	1.82556
A0A1S4D9K0	Acetyltransferase component of pyruvate dehydrogenase complex	LOC107827422	22.5	3	59.958			24641000	23802000	22861000	23768000	24991000	25467000	25945000	2.54677e+07	0.933262
A0A1S4APF2	Acid phosphatase	LOC107799935	20.7	4	27.086			535560000	937140000	92694000	521798000	150380000	114020000	115480000	1.26627e+08	4.12076
A0A1S3ZKV5;A0A1S3X9G0;A0A1S3X1D8;A0A1S4AWL5	acid phosphatase 1-like	LOC107787913;LOC107762710	57.3	11	29.518			2496600000	2401700000	2521700000	2.47333e+09	2589700000	2265300000	2535200000	2463400000	1.00403
P17513;A0A1S3Y236	Acidic endochitinase P; acidic endochitinase P	LOC107771200	5.1	1	27.469			0	0	0	0	0	0	14961000	4987000	0
P17514	Acidic endochitinase Q		4.7	1	27.632			80824000	9006700	9955000	33261900	10438000	6037600	0	5.49187e+06	6.05657
A0A1S4BX55;A0A1S3YT04	acidic mammalian chitinase-like; chitinase-3-like protein 1	LOC107812827;LOC107779287	11.1	3	42.188			31595000	25637000	30189000	2.91403e+07	36466000	39596000	29322000	35128000	0.829547
A0A1S4D3F6	Aconitate hydratase	LOC107825601	50.2	39	108.67	44.6		9814100000	9962100000	9822100000	9866100000	4088900000	4092000000	4022200000	4067700000	2.42547
A0A1S3YRF4	Aconitate hydratase	LOC107778837	35.3	11	108.1			303050000	309980000	342800000	318610000	389400000	329510000	340700000	3.53203e+08	0.902058
A0A1S3YIZ0	Aconitate hydratase	LOC107776610	37.1	3	107.7			166130000	193360000	141880000	1.67123e+08	119540000	132170000	117280000	1.22997e+08	1.35876
A0A1S3WZQ8;A0A1S3YC77	Aconitate hydratase	LOC107759563	49.4	1	108.76			117250000	137430000	255620000	170100000	410000000	349930000	176660000	3.12197e+08	0.544849
A0A1S3YUS5	aconitate hydratase, cytoplasmic-like isoform X1	LOC107779772	8.6	1	111.43			55511000	44389000	42639000	47513000	52620000	50569000	55752000	5.29803e+07	0.896804
A0A1S4CXP9;A0A1S4CFC4	ACT domain-containing protein ACR12-like	LOC107823739;LOC107818354	19.5	6	31.163			208870000	206770000	182510000	1.99383e+08	225130000	250500000	225510000	2.33713e+08	0.853111
A0A1S3YBM6	ACT domain-containing protein DS12, chloroplastic-like	LOC107774407	42	10	30.84			2702500000	2234000000	2593200000	2509900000	2588300000	2552400000	2223000000	2.45457e+09	1.02254
A0A1S4BI32	ACT domain-containing protein DS12, chloroplastic-like	LOC107808454	41.5	2	30.962			827070000	952200000	1306200000	1028490000	1073300000	1017500000	1148600000	1079800000	0.952482
A0A1S3XUP8	ACT domain-containing protein DS12, chloroplastic-like	LOC107769014	27.8	3	30.745			244790000	189370000	219120000	217760000	265780000	216900000	188770000	2.23817e+08	0.972939
A0A1S3WZ66	ACT domain-containing protein DS12, chloroplastic-like	LOC107759486	27.8	1	30.63			16934000	14346000	16925000	1.60683e+07	17243000	11831000	19495000	1.61897e+07	0.992506
A0A1S4AA87;Q05214;A0A1S4BAV7;A0A1S4C557;A0A1S4C1C0;A0A1S3ZT51;A0A1S3X7J8	actin; Actin; actin-like	LOC107795436;LOC107806375	62.3	1	41.724			52621000	37230000	51773000	47208000	33246000	53012000	45968000	4.40753e+07	1.07108
A0A1S3X9U8;A0A1S4DMA6;P93375;A0A1S4C9Z7	actin-104; actin-104-like; Actin-104 (Fragment)	LOC107762828;LOC107831313	52	1	41.753			15913000	16891000	0	1.09347e+07	20270000	19738000	19140000	19716000	0.554609
A0A1S4AC02;P93376;A0A1S4ARM1;A0A1S3WYM6	actin-7; Actin-103 (Fragment); actin-101-like	LOC107795948	66.3	4	41.728			499730000	505390000	457790000	4.87637e+08	388830000	462500000	568520000	4.73283e+08	1.03033
A0A1S4AK61;A0A1S3ZMD9;A0A1S4AJD3	actin-7-like; actin; actin-51-like	LOC107798344;LOC107788267	59.9	1	37.149			44106000	45065000	75454000	54875000	49903000	48075000	61496000	53158000	1.0323
A0A1S4AE13;A0A1S3ZMG8;A0A1S3YSA4	actin-97; actin-97-like	LOC107796649;LOC107788291	61.5	2	41.67			498680000	454010000	414930000	4.55873e+08	459990000	501200000	462750000	4.74647e+08	0.960448
A0A1S4B5W8	actin-97-like	LOC107804820	66.6	1	41.697			182360000	173580000	182080000	179340000	115430000	143380000	196240000	1.51683e+08	1.18233
A0A1S4DK20;A0A1S4ADK7;A0A1S3X929;A0A1S4B370;A0A1S3ZII8;P93374;P93372;A0A1S4CAD2;A0A1S4ACM6;A0A1S4BMT2;A0A1S3ZH87	actin-97-like; actin-71-like; actin-71	LOC107830629;LOC107796502	66.6	24	41.713			12357000000	11992000000	11920000000	1.20897e+10	11972000000	12060000000	12511000000	12181000000	0.992502
A0A1S3Z7F4	actin-depolymerizing factor 1	LOC107783829	33.8	2	15.995			43832000	53347000	0	32393000	0	0	79066000	2.63553e+07	1.22909
A0A1S4ATM6;A0A1S3ZZH0;A0A1S3ZMT3;A0A1S3XVD4	actin-depolymerizing factor 10-like	LOC107801148;LOC107792053	5.1	1	15.776	+		136760000	126860000	162750000	1.42123e+08	110730000	123470000	129270000	1.21157e+08	1.17305
A0A1S3X369;A0A1S3WZQ2;A0A1S4CJ61	actin-depolymerizing factor 2; actin-depolymerizing factor 2-like isoform X1	LOC107760585;LOC107759643	44.1	4	16.478			149490000	145420000	146810000	147240000	159540000	157790000	148280000	1.55203e+08	0.948691
A0A1S4CQE1;A0A1S3YWQ0;A0A1S4CKR2;A0A1S3Z7S4	actin-depolymerizing factor 2-like	LOC107821365;LOC107780538	18.7	2	16.105			112770000	122690000	84027000	1.06496e+08	88856000	83148000	101230000	91078000	1.16928
A0A1S3ZBM0;A0A1S4A643	activator of 90 kDa heat shock protein ATPase homolog	LOC107784939	16.6	4	39.418			73896000	71724000	73879000	7.31663e+07	64084000	79462000	71409000	7.16517e+07	1.02114
A0A1S3YFW6	Acyl carrier protein	LOC107775886	7.1	2	14.952			498520000	484500000	506370000	4.96463e+08	707860000	487970000	604410000	600080000	0.827329
A0A1S3ZMD4;A0A1S4AIT0	Acyl carrier protein	LOC107788261;LOC107798154	12.2	2	14.022			191840000	154110000	144880000	163610000	183050000	153320000	166820000	167730000	0.975437
A0A1S3YFB7	Acyl carrier protein	LOC107775639	7.4	1	13.667			22201000	23329000	0	1.51767e+07	16365000	19731000	16600000	1.75653e+07	0.864012
A0A1S3YMH4	Acyl carrier protein	LOC107777846	6.4	1	16.111			17490000	20861000	13529000	1.72933e+07	0	9777900	17801000	9.19297e+06	1.88115
A0A1S4C0Y8	Acyl carrier protein	LOC107813907	14.8	1	13.68			12723000	0	10579000	7.76733e+06	12133000	0	0	4.04433e+06	1.92055
A0A1S4BXR5	Acyl carrier protein	LOC107813011	10.9	1	14.543			0	0	3513400	1.17113e+06	0	8044200	0	2681400	0.436762
A0A1S3XW87;A0A1S4C5Y0	acyl carrier protein 2, mitochondrial-like; Acyl carrier protein	LOC107769438;LOC107815250	14.1	1	9.6029			34713000	28025000	29303000	3.06803e+07	31474000	34370000	20002000	2.86153e+07	1.07216
A0A1S3YMX8;A0A1S3YC69;A0A1S3ZUI2;A0A1S3YAU3;A0A1S3X8D9;A0A1S4DKP2;A0A1S4AKY5	Acyl-[acyl-carrier-protein] desaturase	LOC107777747;LOC107774635	19	7	45.157			270950000	278000000	273450000	2.74133e+08	222430000	236050000	238720000	232400000	1.17958
A0A1S3Z373;A0A1S4AHZ2	Acylamino-acid-releasing enzyme; acylamino-acid-releasing enzyme-like	LOC107782506;LOC107797904	3.3	2	90.36			13768000	12524000	15843000	14045000	15261000	15256000	12143000	14220000	0.987693
A0A1S4BR06;A0A1S3X1A7	Acylaminoacyl-peptidase	LOC107811002;LOC107760206	2.1	1	83.6			0	0	9907000	3.30233e+06	7975700	0	8195800	5390500	0.612621
A0A1S3Y1F9;A0A1S4D6I4	acyl-CoA-binding domain-containing protein 4 isoform X1; acyl-CoA-binding domain-containing protein 4-like	LOC107771151	4.5	2	54.252			52796000	48925000	45450000	49057000	49244000	32892000	48338000	4.34913e+07	1.12797
A0A1S4BAS4;A0A1S3X642	acyl-CoA-binding domain-containing protein 4-like	LOC107806345;LOC10	2.1	1	73.189			35549000	25358000	25162000	2.86897e+07	0	17170000	25358000	14176000	2.02382
A0A1S3ZIE8	acyl-CoA-binding protein	LOC107787145	78.7	1	10.069			20729000	53307000	31288000	35108000	38307000	36094000	14185000	2.95287e+07	1.18895
A0A1S4D817	acyl-CoA-binding protein-like	LOC107826954	78.7	6	10.051			1518800000	1647700000	1608100000	1.59153e+09	1989200000	1869800000	1779100000	1.87937e+09	0.846846
A0A1S3ZEK9;A0A1S4DG16	Acyl-coenzyme A oxidase	LOC107785996;LOC107829481	5.5	3	77.309			10642000	21108000	15497000	15749000	28069000	14836000	23668000	22191000	0.709702
A0A1S4C0D9;A0A1S3Y093	acyl-coenzyme A oxidase 4, peroxisomal-like	LOC107813755;LOC107770800	7.5	2	46.959			34080000	45814000	24653000	34849000	26744000	28716000	28210000	27890000	1.24952
A0A1S4BUI2;A0A1S4B0Z2;A0A1S4A3G9;A0A1S4DF64	Acyl-coenzyme A oxidase; peroxisomal acyl-coenzyme A oxidase 1-like	LOC107812035;LOC107803334	13.4	6	74.298			49071000	61221000	56683000	5.56583e+07	0	43041000	44695000	2.92453e+07	1.90315
A0A1S4B5E7;A0A1S4BDU7	acylpyruvase FAHD1, mitochondrial-like	LOC107804611;LOC107807241	11.1	1	13.53			21197000	24270000	22096000	22521000	35840000	32107000	28491000	32146000	0.700585
A0A1S3X040;A0A1S3XG19	Adenine phosphoribosyltransferase	LOC107759759;LOC107764701	36.9	5	30.095			334120000	380140000	410940000	3.75067e+08	281260000	338140000	462220000	360540000	1.04029
A0A1S3ZA83;A0A1S3ZHV8	Adenine phosphoribosyltransferase	LOC107784710;LOC107787030	23.1	2	19.972			75465000	16514000	65818000	52599000	61638000	52408000	89146000	6.77307e+07	0.776591
Q5DKU8	Adenosine kinase	LOC107831395	39.7	12	37.553			1285000000	1487000000	1367100000	1379700000	1175000000	1400600000	1373000000	1316200000	1.04824
Q5DKU9	Adenosine kinase	LOC107790330	40	5	37.444			276130000	296970000	281160000	2.84753e+08	234970000	239490000	275400000	2.49953e+08	1.13923
Q5DKV0	Adenosine kinase	LOC107806529	35.3	1	37.423			59738000	59080000	79282000	6.60333e+07	58364000	56299000	48918000	54527000	1.21102
P68173;A1KYB2	Adenosylhomocysteinase	SAHH;SAHH4	58.8	26	53.103			7016600000	7682500000	7411600000	7.37023e+09	5384000000	6372300000	6395800000	6050700000	1.21808
A0A1S3X559	Adenosylhomocysteinase	LOC107761175	53.2	2	53.143			53530000	56872000	45469000	51957000	41472000	0	47476000	2.96493e+07	1.75238
A0A1S4ARB9	Adenosylhomocysteinase	LOC107800462	53.2	1	53.157	+		26612000	26275000	24111000	25666000	0	0	12801000	4267000	6.015
A1KYB0	Adenosylhomocysteinase	SAHH2	58.8	1	53.119			0	0	73843000	2.46143e+07	0	140670000	0	46890000	0.524938
A0A1S4B8X3;A0A1S3ZBD8	Adenylate kinase	LOC107805684;LOC107784862	27.8	8	33.883			544000000	507870000	519340000	5.23737e+08	393240000	415380000	522330000	443650000	1.18052
A0A1S3YQU6	Adenylate kinase	LOC107778794	26.7	15	68.104			505820000	505950000	491640000	5.01137e+08	618640000	549590000	610710000	592980000	0.845116
A0A1S4DNR6;A0A1S4AQN5;A0A1S4DMZ2;A0A1S4B6J5	Adenylate kinase	LOC107831765;LOC107800414	44.4	9	26.67			372710000	424190000	467000000	421300000	479220000	445890000	410090000	4.45067e+08	0.9466
A0A1S4BCC5;A0A1S4BLB9	Adenylate kinase	LOC107806756;LOC107809513	43.2	2	26.71			27251000	18846000	19038000	2.17117e+07	26934000	35741000	26236000	29637000	0.732587
A0A1S3Y0E5	Adenylate kinase	LOC107770764	22.5	2	68.389			47206000	45425000	39844000	4.41583e+07	36417000	38709000	45161000	4.00957e+07	1.10132
A0A1S4BQE3;A0A1S3ZLR0;A0A1S4AG22;A0A1S3Y755	Adenylosuccinate lyase	LOC107810797;LOC107788150	17.4	7	61.185			150330000	153350000	144150000	1.49277e+08	182670000	170040000	165360000	172690000	0.86442
A0A1S3X9F6	Adenylosuccinate synthetase, chloroplastic	LOC107762705	34.9	16	54.845			431090000	426400000	413550000	423680000	443580000	527010000	388680000	453090000	0.93509
A0A1S3ZLP3	Adenylosuccinate synthetase, chloroplastic	LOC107788158	35.4	1	54.883			106180000	58547000	65954000	7.68937e+07	57928000	51613000	0	3.65137e+07	2.10589
A0A1S3XKP8;Q6T7E8;A0A1S4CK31	Adenylosuccinate synthetase, chloroplastic	LOC107766315;PURA	26.2	2	55.016			38524000	54353000	37061000	4.33127e+07	38076000	47998000	50202000	4.54253e+07	0.953491
Q08IJ1	ADP ribosylation factor	ARF	58.6	1	20.665			22995000	26672000	26042000	2.52363e+07	15504000	28924000	27435000	2.39543e+07	1.05352
A0A1S4DKY7;A0A1S4DQU1;A0A1S4AAK1;A0A1S4A210	ADP,ATP carrier protein	LOC107830888;LOC107832462	3.7	2	56.597			33200000	36040000	32189000	3.38097e+07	26514000	26305000	28879000	2.72327e+07	1.24151
A0A1S3ZE04	ADP/ATP translocase	LOC107785678	36.8	16	41.873			3398100000	3554800000	3502900000	3.48527e+09	2262600000	3178800000	3345500000	2.92897e+09	1.18993
A0A1S4BUF1;A0A1S3ZE75;A0A1S3WZA6	ADP/ATP translocase	LOC107811966;LOC107785898	34.7	3	41.838			239490000	218470000	277970000	245310000	171200000	165400000	180610000	1.72403e+08	1.42288
A0A1S3XAI9;A0A1S3YGM4;A0A1S4BHY2;A0A1S4BPY8	ADP/ATP translocase	LOC107763030	36.8	2	41.865			115820000	127400000	143080000	1.28767e+08	73177000	117040000	98415000	9.62107e+07	1.33838
A0A1S4A769;A0A1S3WX61	ADP/ATP translocase	LOC107794499;LOC107758943	23.7	2	41.766			7723300	10156000	9682000	9187100	11976000	7894200	12997000	1.09557e+07	0.838565
A0A1S3X5B3	ADP-ribosyl cyclase/cyclic ADP-ribose hydrolase	LOC107761218	0.6	1	311.58			8959600	16440000	25677000	1.70255e+07	29048000	21554000	0	1.68673e+07	1.00938
A0A1S4CHK0;A0A1S4BNF1;A0A1S4A5T6;A0A1S3ZIL8;A0A1S3ZBE7;A0A1S3Z059;A0A1S4A4R4	ADP-ribosylation factor 2-like isoform X2; ADP-ribosylation factor 2-like	LOC107819113;LOC107810189	64.6	8	18.71			1225000000	1180500000	1214800000	1.20677e+09	800890000	1058800000	1235700000	1.0318e+09	1.16958
A0A1S3ZD33	adrenodoxin-like protein 2, mitochondrial	LOC107785503	7.4	1	22.471			27204000	29572000	31919000	29565000	30705000	0	28772000	1.98257e+07	1.49125
A0A1S4A433;A0A1S3ZMK4	agmatine deiminase-like; agmatine deiminase-like isoform X1	LOC107793493;LOC107788430	10.9	2	43.051			0	12108000	11817000	7975000	0	6014800	10460000	5491600	1.45222
A0A1S4AZM4;A0A1S4DHH6;A0A1S4AIB3	Alanine transaminase	LOC107803058	69.9	32	53.493			8070800000	8014700000	8013600000	8.03303e+09	7513300000	8251900000	7913600000	7.89293e+09	1.01775
A0A1S4AAP9	Alanine transaminase	LOC107795521	43.5	20	60.127			1445000000	1548800000	1287100000	1.42697e+09	1728600000	1549200000	1512500000	1.59677e+09	0.89366
A0A1S4BAT9	Alanine transaminase	LOC107806358	69.9	2	53.507			290370000	328570000	318100000	3.12347e+08	326400000	329420000	319170000	3.24997e+08	0.961077
A0A1S4CQD2	Alanine transaminase	LOC107821527	37	8	59.662			259770000	251910000	254400000	255360000	367910000	252320000	276610000	2.98947e+08	0.854199
A0A1S3ZP91;A0A1S4ADH0	Alanine transaminase	LOC107788950	44.6	3	59.714			39994000	40542000	42933000	4.11563e+07	50578000	40265000	41774000	4.42057e+07	0.931019
A0A1S4AQ94	Alanine transaminase	LOC107800103	36.6	1	57.8			0	0	0	0	0	0	0	0	#DIV/0!
A0A1S4DAJ5;A0A1S4C601	alanine--glyoxylate aminotransferase 2 homolog 1, mitochondrial-like	LOC107827733	14.3	4	51.104			40779000	43062000	52694000	4.55117e+07	55254000	60577000	44330000	53387000	0.852486
A0A1S4D985	Alanine--glyoxylate transaminase	LOC107827351	73.1	21	43.964			13851000000	13378000000	13960000000	1.37297e+10	12987000000	14392000000	14143000000	1.38407e+10	0.99198
A0A1S4ABS2	Alanine--glyoxylate transaminase	LOC107795801	73.1	2	43.93			257470000	184490000	146860000	1.96273e+08	188940000	235310000	181090000	201780000	0.97271
A0A1S4BYR7;A0A1S4B5E8	Alanine--tRNA ligase	LOC107813253;LOC107804690	29.2	24	112.82			1272000000	1319000000	1262400000	1.28447e+09	1220500000	1291800000	1293500000	1268600000	1.01251
A0A1S3YD30;A0A1S3XCB0	ALBINO3-like protein 1, chloroplastic	LOC107774998	8.1	3	55.919			16039000	15901000	15754000	15898000	21381000	17389000	21618000	2.01293e+07	0.789793
A0A1S4BV28	alcohol dehydrogenase 1-like	LOC107812165	9.7	2	41.273			0	0	11787000	3929000	0	16668000	0	5556000	0.707163
A0A1S4DH57	alcohol dehydrogenase-like 7	LOC107829745	20.3	3	42.507			58326000	66513000	53268000	59369000	67221000	68363000	67590000	6.77247e+07	0.876623
A0A1S4AES0	alcohol dehydrogenase-like 7	LOC107796670	17.6	1	42.646			9053300	9462100	0	6171800	9597300	10781000	0	6.79277e+06	0.908584
A0A1S4BV02;A0A1S3ZPA9	alcohol dehydrogenase-like 7; alcohol dehydrogenase-like 7 isoform X1	LOC107812182;LOC107788903	26	6	42.023			117420000	92634000	109410000	106488000	115230000	120450000	109160000	1.14947e+08	0.926412
A0A1S4CXV0;A0A1S4DDS2	alcohol dehydrogenase-like; alcohol dehydrogenase-like isoform X1	LOC107823789;LOC107828743	2.2	1	47.731			0	0	15930000	5310000	13542000	14183000	12923000	1.35493e+07	0.391901
A0A1S4AF86	Aldehyde dehydrogenase (NAD(+))	LOC107796971	20.1	8	54.596			230000000	240110000	234770000	234960000	210170000	236100000	227050000	224440000	1.04687
A0A1S4C8K6	Aldehyde dehydrogenase (NAD(+))	LOC107816273	20.1	1	54.656			38657000	0	0	1.28857e+07	36392000	0	0	1.21307e+07	1.06224
A0A1S4AFY8;A0A1S3Z7K9;A0A1S3XNK9;A0A1S4A8P8	aldehyde dehydrogenase family 2 member B4, mitochondrial-like isoform X1	LOC107797234	22.9	12	58.444			834330000	820120000	841590000	8.32013e+08	654590000	737780000	790580000	727650000	1.14343
A0A1S4AU40;A0A1S3Z2K5	aldehyde dehydrogenase family 2 member B7, mitochondrial-like	LOC107801292	6.7	2	58.676			85115000	101450000	104140000	9.69017e+07	72883000	89102000	100800000	87595000	1.10625
A0A1S3XNK7;A0A1S3ZAT2	aldo-keto reductase family 4 member C10-like isoform X1; aldo-keto reductase family 4 member C10-like	LOC107767146;LOC1	19.7	5	35.311			99698000	91223000	101350000	9.74237e+07	113050000	89759000	96708000	99839000	0.975808
A0A1S4AAB4	aldo-keto reductase family 4 member C9-like	LOC107795448	3.6	1	34.505			0	0	0	0	0	0	9460200	3153400	0
A0A1S4AYJ2;A0A1S3ZP18	Aldose 1-epimerase	LOC107802567	18.2	4	36.589			125610000	109320000	87996000	107642000	139230000	128380000	124640000	130750000	0.823266
A0A1S3ZMV8	Aldose 1-epimerase	LOC107788426	10.8	4	40.706			90586000	102830000	79369000	9.09283e+07	154730000	101870000	105700000	1.20767e+08	0.752926
A0A1S3ZIM4;A0A1S3ZMJ0;A0A1S3ZIH6;A0A1S4B9Y6;A0A1S3ZIT0;A0A1S3ZIA8;A0A1S3ZM28;A0A1S3ZM21;A0A1S3ZII0;Q947H4	Aldose 1-epimerase	LOC107787172;LOC107788425	9.5	1	41.428			34470000	48414000	57068000	4.66507e+07	65393000	55258000	46435000	5.56953e+07	0.837605
A0A1S4DGU1;A0A1S3ZLJ6	Aldose 1-epimerase	LOC107829645;LOC107788085	4.2	1	38.96			0	0	0	0	0	0	0	0	#DIV/0!
A0A1S4CB19;A0A1S4BQ04;A0A1S4APH0;A0A1S4CYU6	Alkaline/neutral invertase	LOC107816919;LOC107810684	3.4	2	73.632			24953000	29122000	21819000	25298000	37903000	0	27765000	2.18893e+07	1.15572
A0A1S3Z835;A0A1S4DSM6	allene oxide synthase, chloroplastic-like	LOC107783985;LOC107832778	4.8	2	58.863			0	0	22086000	7362000	0	23476000	23045000	15507000	0.474753
Q711R1;A0A1S3XQE4	Allene-oxide cyclase	aoc;LOC107767576	14.3	3	26.524			62748000	64593000	63596000	6.36457e+07	91236000	77152000	80047000	8.28117e+07	0.768559
A0A1S4C3K0	Alpha-1,4 glucan phosphorylase	LOC107814807	31.6	26	114.03			1357000000	1380300000	1365400000	1.36757e+09	1144400000	1330500000	1238300000	1.23773e+09	1.1049
A0A1S4D3A0	Alpha-1,4 glucan phosphorylase	LOC107825407	29	18	111.56			857040000	918580000	891730000	8.89117e+08	786690000	850350000	901940000	8.46327e+08	1.05056
A0A1S4CKW1;A0A1S3XEF3	Alpha-1,4 glucan phosphorylase	LOC107819983;LOC107764127	26.6	15	95.622			404330000	376670000	452540000	411180000	211300000	225400000	224580000	2.20427e+08	1.86538
A0A1S3Y200	Alpha-1,4 glucan phosphorylase	LOC107771409	27.8	2	110.96			164940000	78221000	154220000	1.3246e+08	245460000	155290000	95166000	1.65305e+08	0.801307
A0A1S4BNW5	Alpha-1,4 glucan phosphorylase	LOC107810306	29.8	3	110.35			57908000	49946000	65089000	5.76477e+07	52362000	34835000	67656000	5.16177e+07	1.11682
A0A1S3YW41;A0A1S3ZN16	Alpha-amylase	LOC107780165;LOC107788587	10.4	8	101.91			120800000	112630000	110510000	1.14647e+08	90136000	123470000	117230000	1.10279e+08	1.03961
A0A1S4C0Q1	alpha-dioxygenase 1-like	LOC107813858	19.6	2	73.743			22726000	20928000	0	1.45513e+07	0	13036000	25129000	1.27217e+07	1.14382
A0A1S3ZX38;A0A1S4B9X7	Alpha-dioxygenase PIOX	PIOX	27.2	14	73.452			233040000	236210000	211390000	226880000	284520000	241480000	243070000	2.56357e+08	0.885017
A0A1S4DJ87	Alpha-galactosidase	LOC107830401	21	8	45.656			115120000	128250000	125260000	1.22877e+08	136700000	142010000	131990000	136900000	0.897565
A0A1S3XW02;A0A1S3YUS6;A0A1S4ALI5	Alpha-galactosidase	LOC107769425;LOC107779897	17.3	5	47.779			66762000	47769000	65430000	59987000	66407000	55878000	36448000	52911000	1.13373
A0A1S4DMV8;A0A1S4AU86;A0A1S3Y0V8	Alpha-galactosidase	LOC107831502;LOC107801489	7.6	2	47.328			14060000	0	12941000	9.00033e+06	15676000	17773000	0	1.11497e+07	0.807229
A0A1S3YFY7;A0A1S4B677	alpha-glucan water dikinase, chloroplastic isoform X1	LOC107775774	22.3	1	166.57			11112000	0	0	3704000	0	0	0	0	#DIV/0!
A0A1S4DS49	alpha-glucan water dikinase, chloroplastic-like isoform X1	LOC107832610	23.8	28	167.5			899170000	899920000	928480000	909190000	825140000	901730000	971720000	899530000	1.01074
A0A1S3WZZ3;A0A1S3XBY8	alpha-glucosidase-like	LOC107759721;LOC107763450	9.9	7	102.07			87564000	83558000	93065000	8.80623e+07	89645000	82254000	99358000	90419000	0.973936
A0A1S3ZNE8	Alpha-mannosidase	LOC107788691	31.4	22	116.18			986350000	788390000	793060000	8.55933e+08	1170900000	1051700000	998140000	1073580000	0.79727
A0A1S4C159;A0A1S4BGQ7;A0A1S3YUS4	Alpha-mannosidase	LOC107814068	27.4	6	105.02			120980000	135490000	170410000	1.42293e+08	205000000	182430000	186240000	1.91223e+08	0.744121
A0A1S4BRE3;A0A1S4DP71;A0A1S3ZNV0;A0A1S3YYQ1	alpha-N-acetylglucosaminidase-like	LOC107811032;LOC107831936	2.5	2	92.577			8908200	0	9249300	6052500	12670000	8512100	13851000	11677700	0.518296
A0A1S4BC30;A0A1S4CF40;A0A1S3YTM9;A0A1S4AAI7	alpha-soluble NSF attachment protein-like; alpha-soluble NSF attachment protein isoform X1	LOC107806719;LOC107818292	14.3	4	31.489			107870000	105680000	98373000	1.03974e+08	156190000	134050000	147580000	145940000	0.712446
A0A1S4ASP4;A0A1S3Y2L8;A0A1S4C5Z9	alpha-xylosidase 1-like	LOC107800803;LOC107771561	4.4	3	104.82			61345000	38523000	49930000	4.99327e+07	52207000	46474000	48630000	4.91037e+07	1.01688
A0A1S4D1W7	altered inheritance of mitochondria protein 32-like	LOC107825067	2.5	1	43.795			24379000	25661000	24364000	2.48013e+07	30278000	27412000	27882000	28524000	0.86949
A0A1S4AE11;A0A1S4AS63	alternative NAD(P)H-ubiquinone oxidoreductase C1, chloroplastic/mitochondrial-like	LOC107796444	8.2	4	58.465			36214000	31604000	33669000	33829000	29464000	37568000	35589000	34207000	0.98895
A0A1S3YI76;A0A1S4BG83	amidase 1-like	LOC107776547	12.9	3	45.441			47891000	43078000	50317000	4.70953e+07	57254000	48328000	40776000	48786000	0.965345
A0A1S4BTV5;A0A1S3YBA8	aminoacyl tRNA synthase complex-interacting multifunctional protein 1-like	LOC107811838	26.9	5	30.227			241870000	195820000	214710000	2.17467e+08	314800000	271660000	225590000	2.70683e+08	0.803399
A0A1S3YC63;A0A1S3XU49	aminoacylase-1-like	LOC107774716;LOC107768780	4	1	50.54			0	15322000	8946400	8.08947e+06	11711000	0	0	3.90367e+06	2.07227
A0A1S4C9W9;A0A1S3Z8J8	aminohydrolase-like isoform X1	LOC107816704;LOC1077	12.1	2	35.273			162030000	171460000	212900000	182130000	219680000	221730000	187620000	2.09677e+08	0.868623
A0A1S3Z7S7	Aminomethyltransferase	LOC107783755	71.4	28	44.192			10431000000	10579000000	10137000000	1.03823e+10	9138400000	10394000000	9850000000	9.79413e+09	1.06006
A0A1S4B9H4	Aminomethyltransferase	LOC107805971	71.4	1	44.216			0	0	0	0	0	0	0	0	#DIV/0!
A0A1S4BAI3;REV__A0A1S3YP16	Aminopeptidase	LOC107806287	11.2	9	95.741			183280000	162490000	184700000	1.76823e+08	155540000	143580000	164350000	154490000	1.14456
A0A1S4A804;A0A077D7R0	Ammonium transporter	LOC107794756;LOC107793077	4.3	2	50.017			0	0	0	0	0	0	20439000	6813000	0
A0A1S4ACC3;A0A1S3ZRU6	AMP deaminase	LOC107795991;LOC107789715	2	1	93.107			0	0	0	0	0	0	0	0	#DIV/0!
Q9AT16;Q8H6P9	Ankyrin-repeat protein HBP1; Ankyrin domain protein	LOC107793888;ANK1	57.4	17	37.317			4385800000	4213500000	3959700000	4.18633e+09	5512200000	4808400000	4832900000	5.05117e+09	0.828785
O24132;A0A1S3YGW3;A0A1S3Y8G8	Annexin	X671	71.7	25	35.949			2928100000	2820800000	2816600000	2.85517e+09	4166200000	3784300000	3460600000	3803700000	0.750629
A0A1S4D206	Annexin	LOC107825155	68.5	6	35.914			925700000	883060000	1011600000	940120000	1321500000	1146500000	1130000000	1.19933e+09	0.783869
A0A1S3ZQZ9;A0A1S3Z557;A0A1S4D4I9;A0A1S4CZP1	Annexin	LOC107789616	11.1	3	35.578			94632000	0	106480000	6.70373e+07	137760000	91369000	0	7.63763e+07	0.877724
Q9XEN8;A0A1S3XC82	Annexin	Anx3;LOC107763461	12.3	3	35.937			92139000	89287000	84492000	8.86393e+07	84129000	83492000	89271000	8.56307e+07	1.03514
A0A1S4A2A5;A0A1S4A1J9	anthocyanidin reductase-like	LOC107792951;LOC107792753	11.3	3	37.439			0	62278000	67807000	4.33617e+07	0	64712000	60836000	4.18493e+07	1.03614
A0A1S4D5V0;A0A1S3XBG7;A0A1S3XVE8	anthranilate phosphoribosyltransferase isoform X2; uncharacterized protein LOC107763210	LOC107826215;LOC107763210	4.9	2	64.83			0	0	6822800	2.27427e+06	0	4136300	0	1.37877e+06	1.64949
A0A1S4D9Q7;A0A1S4D5L0	anthranilate phosphoribosyltransferase, chloroplastic-like	LOC107827513	9.6	3	48.842			21165000	23947000	21759000	2.22903e+07	24306000	17573000	25757000	2.25453e+07	0.988689
A0A1S3ZVS7;A0A1S4BJD7;A0A1S4A5W9;A0A1S4C128	Anthranilate synthase	LOC107790966;LOC107808972	20.4	10	66.714			108670000	103930000	115240000	109280000	102570000	123800000	93621000	1.06664e+08	1.02453
A0A0R4WG16;A0A0R4WFT2	Antimicrobial peptide	SN1b;SN1a	11.4	1	9.7216			15707000	13055000	12002000	13588000	11609000	11753000	8952500	10771500	1.26148
A0A1S3Y811;A0A1S3ZU44;A0A1S4CAC7	AP-1 complex subunit gamma	LOC107773525;LOC107790516	5.5	4	94.852			0	10650000	10895000	7.18167e+06	20912000	13846000	20953000	1.85703e+07	0.386728
A0A1S4BH94;A0A1S4BQ82	AP-1 complex subunit gamma	LOC107808228;LOC107810750	4.4	1	96.172			0	0	11454000	3818000	7893500	0	16712000	8.20183e+06	0.465506
A0A1S4C2R5;A0A1S4CA82;A0A1S4ANU1	AP-1 complex subunit mu-2-like; AP-1 complex subunit mu-2	LOC107814454;LOC107816812	3.3	1	46.203			11093000	9858000	4914400	8621800	29303000	8172000	7973000	1.51493e+07	0.569121
A0A1S4D5T7;A0A1S3YES2;A0A1S4A121;A0A1S3XSG8	AP-2 complex subunit alpha	LOC107826292;LOC107775474	1.6	2	113.8			0	0	8867800	2.95593e+06	7528000	0	15950000	7826000	0.377707
A0A1S3YJK6;A0A1S3Z1Y3;A0A1S4D2C2	AP-4 complex subunit epsilon; AP-4 complex subunit epsilon-like	LOC107776976;LOC107782050	4	3	106.67			41571000	30476000	32893000	34980000	33950000	35524000	39007000	3.61603e+07	0.967358
A0A1S3ZAT9;A0A1S3YAR6	AP-4 complex subunit mu-like; AP-4 complex subunit mu	LOC107784896;LOC107774321	6.2	2	50.599			14834000	17476000	9383300	1.38978e+07	14058000	11101000	19862000	15007000	0.926086
A0A1S4DKG1;A0A1S4A9C8	apoptosis inhibitor 5-like; apoptosis inhibitor 5-like isoform X1	LOC107830655;LOC107795173	10.7	5	62.112			49936000	44497000	41195000	4.52093e+07	46874000	38183000	36407000	40488000	1.11661
A0A1S3ZHV1;A0A1S3Y3Y0	apyrase 2-like	LOC107786853;LOC107771917	15.3	5	51.223			30982000	27818000	22877000	2.72257e+07	19264000	21148000	31242000	2.38847e+07	1.13988
A0A0A8WHB3	Aquaporin PIP1 2b	LOC107779998	25.4	1	30.82			30315000	24188000	26615000	2.70393e+07	26657000	28220000	32754000	2.92103e+07	0.925677
A0A0A8WK73;A0A1S3YLG3;A0A1S4D5K7;A0A1S4A7T5;A0A1S3XZ68;A0A1S4DDB6;A0A1S4D5F0;A0A1S4BJ00	Aquaporin PIP1 4; aquaporin PIP1-1-like	LOC107817177;LOC107777329	7.7	2	30.488			133430000	74051000	91371000	9.96173e+07	67519000	81340000	88173000	7.90107e+07	1.26081
Q06BK4;A0A0A8WK03	Aquaporin PIP1-5s; Aquaporin PIP1 2a	LOC107778528;LOC107812756	25.4	1	30.795			233250000	152030000	139580000	1.74953e+08	184290000	179300000	153220000	172270000	1.01558
A0A1S4D4I4	Aquaporin PIP1-5t	LOC107825853	25.4	7	30.755			973170000	999290000	965680000	979380000	899320000	1153200000	1113000000	1.05517e+09	0.92817
A0A0A8WH11	Aquaporin PIP2 10	LOC107794452	3.9	1	30.365			10146000	14979000	8392700	1.11726e+07	8471300	13104000	0	7.19177e+06	1.55352
A0A0A8WJH9;A0A0A8WH05	Aquaporin PIP2 4b; Aquaporin PIP2 4a	LOC107824558;LOC107792086	5.2	1	30.775			22567000	24942000	18412000	2.19737e+07	22581000	28229000	26664000	2.58247e+07	0.850879
A0A0A8WK75;A0A0A8WHB9	Aquaporin PIP2 6b; Aquaporin PIP2 6a	LOC107815182;LOC107786743	10.2	2	30.387			44077000	45143000	41748000	43656000	42439000	55144000	48213000	4.85987e+07	0.898296
A0A0A8WJI1;A0A0A8WH07	Aquaporin PIP2 7b; Aquaporin PIP2 7a	LOC107826207;LOC107789972	16.5	4	30.471			228810000	224550000	211840000	2.21733e+08	202050000	246180000	240460000	2.29563e+08	0.965892
A0A0A8WK76	Aquaporin PIP2 9b	LOC107763243	5.9	1	30.734			33965000	27316000	0	20427000	0	24009000	25003000	1.63373e+07	1.25033
A0A1S4BCP4;A0A1S3ZDF4	aquaporin PIP2-1-like	LOC107806939;LOC107785545	3.8	1	31.213			43973000	45709000	42002000	4.38947e+07	38512000	44947000	44060000	4.25063e+07	1.03266
A0A1S3YFB1;Q9ZR68	Aquaporin TIP1-1t; Aquaporin 1	LOC107775705;aqp1	8	2	25.813			725050000	619500000	465010000	6.03187e+08	1068900000	949260000	959570000	9.92577e+08	0.607698
A0A1S4C4J6;A0A1S3YER0	Aquaporin TIP1-3t; Aquaporin TIP1-3s	LOC107814985;LOC107775280	6.5	1	25.118			0	0	0	0	0	0	64542000	21514000	0
A0A1S4CQP5;A0A1S3ZEL4	Aquaporin TIP2-1t; aquaporin TIP2-1-like isoform X1	LOC107821662;LOC107786005	7.3	2	25.067			105460000	107670000	102650000	105260000	164370000	183720000	182600000	1.76897e+08	0.595037
A0A076FNG8	Aquaporin TIP2-5s	MIP	7.3	2	24.937			195320000	184820000	175120000	1.85087e+08	325370000	266380000	304330000	2.98693e+08	0.619654
A0A1S3XY89;A0A1S3X759	arginase 1, mitochondrial	LOC107770139	18.6	3	37.039			61945000	0	74736000	4.55603e+07	86650000	113580000	58031000	86087000	0.529236
A0A1S3Z790	Arginine biosynthesis bifunctional protein ArgJ, chloroplastic	LOC107783830	21.2	7	49.157			262970000	265180000	284960000	2.71037e+08	314960000	288670000	290790000	298140000	0.909092
A0A1S4APC8	Arginine biosynthesis bifunctional protein ArgJ, chloroplastic	LOC107799701	19.7	3	49.085			56335000	51515000	54015000	53955000	65565000	52375000	59181000	5.90403e+07	0.913867
A0A1S4BAN6;A0A1S4ADD4	Arginine--tRNA ligase	LOC107806361;LOC107796381	15.8	9	66.734			199530000	197410000	171510000	1.89483e+08	163110000	169320000	200860000	1.77763e+08	1.06593
A0A1S3YIR3;A0A1S3YIF8;A0A1S3YCQ9	Arginine--tRNA ligase	LOC107776459;LOC107776442	14.5	2	73.245			25961000	21370000	0	15777000	18626000	22459000	24363000	21816000	0.723185
A0A1S3Z7A0;A0A1S4AWW1	argininosuccinate lyase, chloroplastic; argininosuccinate lyase, chloroplastic-like	LOC107783840;LOC107802171	19.7	8	58.361			335700000	325540000	291040000	3.17427e+08	252140000	320360000	245500000	2.72667e+08	1.16416
A0A1S4BZ30	argininosuccinate lyase, chloroplastic-like	LOC107813406	23	1	32.566			26097000	19382000	25919000	2.37993e+07	29746000	28793000	29539000	2.93593e+07	0.810622
A0A1S3ZBD7;A0A1S3YX56	Argininosuccinate synthase	LOC107784999;LOC107780821	8.4	3	53.998			57266000	53163000	51387000	5.39387e+07	34644000	75629000	80705000	6.36593e+07	0.847302
A0A1S4C8Z5;A0A1S4DGK7;A0A1S3Z5D8;A0A1S4CB01;A0A1S4ADU9;A0A1S3ZDH5;A0A1S4B702;A0A1S3XRA9	Arogenate dehydratase	LOC107816404;LOC107829564	9.9	3	30.5			28912000	22612000	25462000	25662000	17712000	19897000	28361000	21990000	1.16698
A0A1S4CDP8;A0A1S4A1C0	Asparagine synthetase [glutamine-hydrolyzing]	LOC107817957;LOC107792671	12.4	6	65.441			175970000	178970000	187030000	1.80657e+08	131200000	150870000	185170000	1.55747e+08	1.15994
A0A1S4BZ26	asparagine synthetase [glutamine-hydrolyzing] 2-like	LOC107813403	16.5	1	36.921			29534000	29749000	38624000	3.26357e+07	19072000	31805000	34936000	2.86043e+07	1.14093
A0A1S3Y4C0;A0A1S4APD0	Asparagine--tRNA ligase	LOC107772035;LOC107799901	27.7	15	64.921			455710000	434340000	457430000	449160000	479990000	497410000	461300000	4.79567e+08	0.936596
A0A1S3ZCY7	Asparagine--tRNA ligase	LOC107785502	24.4	5	64.797			110510000	121530000	105950000	1.12663e+08	141760000	148900000	110840000	1.33833e+08	0.841818
A0A1S3XQZ7	Asparagine--tRNA ligase	LOC107767713	20.3	2	64.754			115720000	115780000	63363000	9.82877e+07	192350000	106660000	185680000	1.61563e+08	0.608354
A0A1S3YGP6;A0A1S4BLE7	Asparagine--tRNA ligase	LOC107776004;LOC107809566	8.6	4	64			86815000	76331000	79564000	8.09033e+07	91511000	69932000	79968000	8.04703e+07	1.00538
A0A1S3XDE1;A0A1S3XS88	Aspartate aminotransferase	LOC107763872	68	26	50.733			2294800000	2342500000	2268100000	2301800000	2266400000	2351900000	2278000000	2.29877e+09	1.00132
A0A1S3ZLW1;A0A1S4AT92	Aspartate aminotransferase	LOC107788146;LOC107801037	19.8	8	46.985			193550000	212990000	203970000	2.03503e+08	126230000	154080000	187030000	155780000	1.30635
A0A1S3YQG6;A0A1S4ASM7	Aspartate aminotransferase	LOC107778680;LOC107800998	23.7	7	44.852			165630000	133720000	186900000	1.62083e+08	115520000	118160000	136740000	1.23473e+08	1.3127
A0A1S4CNP0;A0A1S4A9E4;A0A1S3Z9X4	Aspartate aminotransferase	LOC107820992	66.2	1	50.878	+		0	0	0	0	0	0	53052000	17684000	0
A0A1S3Y9E9;A0A1S4D3Y8	Aspartate aminotransferase	LOC107773771;LOC107825707	13.2	1	49.115			0	15736000	12968000	9568000	0	0	9560300	3.18677e+06	3.00242
A0A1S4C4M6;A0A1S4B8P7	Aspartate carbamoyltransferase	LOC107815103;LOC107805660	3	1	45.326			14848000	17307000	16486000	1.62137e+07	13020000	11853000	14188000	1.30203e+07	1.24526
A0A1S4CLB7	Aspartate-semialdehyde dehydrogenase	LOC107820046	16.8	4	41.612			153780000	151740000	159930000	155150000	195450000	170310000	162750000	176170000	0.880683
A0A1S4BYV8	Aspartate-semialdehyde dehydrogenase	LOC107813234	16.8	1	41.666			32436000	33601000	37384000	3.44737e+07	44499000	36060000	41546000	4.07017e+07	0.846984
A0A1S4APY2;A0A1S3XQI7	Aspartate--tRNA ligase	LOC107800111;LOC107767661	26.1	13	60.611			366330000	382930000	356930000	368730000	369730000	371970000	341610000	3.61103e+08	1.02112
A0A1S4BWS7	aspartate--tRNA ligase, chloroplastic/mitochondrial-like	LOC107812591	14.4	6	66.809			118270000	109770000	104670000	1.10903e+08	89968000	106770000	127530000	1.08089e+08	1.02603
A0A1S4BGH7;A0A1S4AR61;A0A1S3YD78	aspartic proteinase A1-like	LOC107808002	26	10	52.851			520930000	495560000	473510000	4.96667e+08	450930000	389400000	405730000	4.15353e+08	1.19577
A0A1S3XMX2;A0A1S4DK66;A0A1S3ZK80	aspartic proteinase A1-like isoform X1	LOC107766898	12.7	7	58.029			353650000	349240000	365670000	3.56187e+08	366510000	338580000	359970000	355020000	1.00329
A0A1S3ZI54;A0A1S4CG14	aspartic proteinase-like	LOC107787118;LOC107818598	19.6	6	55.428			107290000	98237000	97853000	1.01127e+08	126400000	108020000	117260000	1.17227e+08	0.862659
A0A1S4DE48	aspartyl protease AED3-like	LOC107828826	33.7	10	47.346			1003600000	1013300000	1001100000	1006000000	1067800000	967860000	904820000	980160000	1.02636
A0A1S3YUW7;A0A1S4A0D6	aspartyl protease AED3-like	LOC107779946;LOC107792369	9	2	46.04			492010000	560470000	354080000	4.68853e+08	653000000	514450000	700400000	6.22617e+08	0.753037
A0A1S4BAC6	aspartyl protease AED3-like	LOC107806163	37.4	3	46.726			137540000	140150000	146030000	141240000	174520000	141570000	149390000	155160000	0.910286
A0A1S4AWK3	aspartyl protease AED3-like	LOC107801990	5.2	1	46.601			28862000	22510000	33791000	2.83877e+07	29474000	31904000	32919000	3.14323e+07	0.903136
A0A1S3XC61	aspartyl protease family protein At5g10770-like	LOC107763440	21.3	1	53.605			43252000	41220000	48332000	44268000	55908000	47407000	47266000	5.01937e+07	0.881944
A0A1S3YNH7;A0A1S4B441	AT-hook motif nuclear-localized protein	LOC107777903;LOC107804336	4	1	35.469			0	0	9442500	3147500	0	0	0	0	#DIV/0!
A0A1S3XMD5;A0A1S3YRG8;A0A1S4AA32;A0A1S3Z8J7	ATP citrate synthase	LOC107766682;LOC107778993	33.2	16	66.021			545620000	570380000	584860000	5.66953e+08	511080000	616100000	584640000	5.70607e+08	0.993597
A0A1S4CIK7;A0A1S3YQ39;A0A1S4ANL0;A0A1S3YHK3;A0A1S3ZJY4;A0A1S3Z039	ATP citrate synthase	LOC107819406;LOC107778559	13.5	5	46.495			133050000	129400000	132110000	131520000	132840000	143050000	144330000	1.40073e+08	0.938937
A0A1S4A473	ATP citrate synthase	LOC107793546	33.4	1	65.77			11664000	11527000	9247200	1.08127e+07	0	16583000	0	5.52767e+06	1.95611
A0A1S3ZZR4;A0A1S3YZ51	ATP phosphoribosyltransferase	LOC107792258;LOC107781436	38.9	11	42.933			673550000	677620000	743360000	6.98177e+08	688880000	543050000	750610000	6.60847e+08	1.05649
A0A140G1Q0	ATP synthase CF0 A subunit	atpI	19.4	4	27.002			332710000	219400000	181030000	244380000	161580000	181000000	310030000	2.17537e+08	1.1234
A0A140G1P8	ATP synthase CF0 B subunit	atpF	57.1	14	20.857			5373500000	5937800000	5536600000	5.61597e+09	4487000000	4807100000	5322400000	4.87217e+09	1.15266
A0A140G1S1	ATP synthase CF1 epsilon subunit	atpE	62.4	9	14.607			4037300000	4191400000	4925700000	4384800000	3656700000	4039700000	4183800000	3.96007e+09	1.10725
A0A1S4AHW5;P32980	ATP synthase delta chain, chloroplastic	LOC107797795;ATPD	50	2	26.829			438490000	1291400000	1651400000	1.1271e+09	309970000	955380000	1063000000	7.76117e+08	1.45223
A0A1S4CSA5	ATP synthase delta chain, chloroplastic-like	LOC107821979	50	11	26.792			6452000000	6603400000	7004100000	6686500000	6428300000	6476900000	7315800000	6.74033e+09	0.992013
P29790;A0A1S4C0T3	ATP synthase gamma chain, chloroplastic; LOW QUALITY PROTEIN: ATP synthase gamma chain, chloroplastic-like	ATPC;LOC107813955	52.8	5	41.446			677660000	673980000	679120000	676920000	427930000	591900000	640920000	5.53583e+08	1.2228
A0A1S4A0E0	ATP synthase gamma chain, chloroplastic-like	LOC107792409	54.6	21	41.462			8665400000	9375200000	8558000000	8866200000	5981800000	7229700000	7768400000	6993300000	1.26781
P09003;A0A0M4JST5	ATP synthase protein MI25	atp4	7.6	2	22.436			172640000	197200000	183390000	184410000	99817000	140950000	144230000	1.28332e+08	1.43697
P60116	ATP synthase subunit 9, mitochondrial	ATP9	41.9	1	7.563			5989900	7562700	0	4.51753e+06	3955900	0	13922000	5959300	0.758064
A0A140G1P7	ATP synthase subunit alpha	atpA	47.5	24	55.422			49973000000	51062000000	52927000000	5.13207e+10	32420000000	43990000000	46408000000	4.09393e+10	1.25358
A0A0M4JJI5;A0A1S4AKZ6	ATP synthase subunit alpha	atp1	43.8	20	55.225			6861800000	6821300000	6931600000	6.87157e+09	5404300000	5894000000	6309200000	5.86917e+09	1.17079
A0A1S4AX40	ATP synthase subunit b, chloroplastic-like	LOC107802241	38.2	12	24.051			9095300000	9378400000	8898800000	9.12417e+09	11617000000	9751000000	8051500000	9806500000	0.93042
A0A1S3ZWF6;A0A1S3Z105	ATP synthase subunit b, chloroplastic-like	LOC107791170;LOC107781811	38.2	1	23.998			657510000	623580000	604120000	6.28403e+08	879360000	702340000	668130000	7.49943e+08	0.837934
A0A1S3ZFZ7	ATP synthase subunit b, chloroplastic-like	LOC107786267	38.6	1	24.471	+		0	0	0	0	0	0	0	0	#DIV/0!
A0A140G1S2	ATP synthase subunit beta	atpB	76.9	31	53.539			67937000000	69413000000	74629000000	7.06597e+10	45682000000	64289000000	62543000000	5.75047e+10	1.22876
A0A1S4A1J2;A0A1S3YGJ0	ATP synthase subunit beta	LOC107792824;LOC107776036	75.5	29	59.694			9982000000	11411000000	10487000000	1.06267e+10	7602100000	8841700000	9491200000	8645000000	1.22923
A0A1S4CK04;A0A1S4BNT4;A0A1S3Y5A9	ATP synthase subunit beta	LOC107819718;LOC107810265	72.5	3	59.812			478180000	485480000	525340000	4.96333e+08	409500000	484950000	497060000	4.63837e+08	1.07006
A0A1S3Z5T0;A0A1S3ZAK6;A0A1S3XQF4;A0A1S3X7K7	ATP synthase subunit d, mitochondrial	LOC107783110;LOC107784751	66.7	13	19.821			635110000	602620000	589560000	6.09097e+08	601040000	652410000	621760000	625070000	0.974446
A0A1S3ZVH3	ATP synthase subunit d, mitochondrial	LOC107790868	48.7	1	13.589			0	0	0	0	0	0	33637000	1.12123e+07	0
A0A1S3XR26	ATP synthase subunit delta, mitochondrial-like	LOC107767598	26.9	5	21.536			250330000	286850000	267870000	268350000	226750000	227150000	277980000	243960000	1.09998
A0A1S4CEH0;A0A1S4DS02;A0A1S4DCZ3;A0A1S4BEW5;A0A1S4BAA8	ATP synthase subunit delta, mitochondrial-like	LOC107817974;LOC107832	18.5	2	21.399			34988000	63979000	32236000	4.37343e+07	38828000	28111000	37083000	34674000	1.2613
A0A1S3Z224	ATP synthase subunit e, mitochondrial	LOC107782154	34	1	5.6906			46320000	41564000	49944000	4.59427e+07	44007000	36541000	45084000	4.18773e+07	1.09708
A0A1S4AVH2;A0A1S4A3W6;A0A1S3XUA2;A0A1S3X8M2;A0A1S3Y646	ATP synthase subunit epsilon, mitochondrial-like	LOC107801741;LOC1077	31.4	2	7.9239			208270000	168360000	169570000	1.82067e+08	188940000	202340000	195500000	1.95593e+08	0.930843
A0A1S4CXJ8;A0A1S3X7M0;A0A1S3ZTP5;A0A1S3XRT7	ATP synthase subunit gamma; ATP synthase subunit gamma, mitochondrial	LOC107823685;LOC107762073	49.1	12	35.46			757290000	720990000	782250000	753510000	686750000	743650000	730180000	7.20193e+08	1.04626
A0A1S3WZA4;A0A1S4C1K4	ATP synthase subunit O, mitochondrial-like	LOC107759517;LOC107814191	50.8	12	26.349			913500000	937630000	939490000	9.30207e+08	719640000	810610000	823100000	784450000	1.18581
A0A1S4BP24;A0A1S3Z6A3	ATPase ASNA1 homolog	LOC107810367	21.2	4	25.686			88627000	138510000	125330000	117489000	84705000	120640000	98667000	1.01337e+08	1.15939
A0A1S3XFC9	ATPase ASNA1 homolog	LOC107764515	26.4	1	18.922			22392000	0	0	7464000	22751000	41356000	0	21369000	0.349291
A0A1S3X3L0;A0A1S4CJ63	ATPase ASNA1 homolog 2-like	LOC107760822;LOC107819635	8.7	1	40.171			0	0	7650000	2550000	30804000	0	0	10268000	0.248344
A0A1S4BLU2;A0A1S4BN34;A0A1S4C1S5;A0A1S4B291;A0A1S4CMW6;A0A1S3Y4P6	ATPase family AAA domain-containing protein 1-A-like; ATPase family AAA domain-containing protein 1-like	LOC107809666;L	15.1	2	36.197			7789000	8566300	7328800	7894700	0	6643500	9296800	5.31343e+06	1.4858
A0A1S4D788;A0A1S4CVS3;A0A1S3XDZ2;A0A1S4BV00;A0A1S3XEQ1;A0A1S3YCG5	ATPase LOC107826790	LOC107826790	14.4	5	40.422			121520000	225530000	279170000	208740000	147570000	209640000	205220000	1.87477e+08	1.11342
A0A1S4ARB5;A0A1S4BQT4;A0A1S3Z1M5;A0A1S3YDQ2	ATP-dependent 6-phosphofructokinase	LOC107800470;LOC107810931	7.4	3	59.53			37437000	32110000	39523000	3.63567e+07	31150000	25362000	27925000	2.81457e+07	1.29173
A0A1S4AJI4;A0A1S3Y1E2	ATP-dependent Clp protease ATP-binding subunit ClpA homolog CD4B, chloroplastic-like	LOC107798347	63.2	59	102.28			12636000000	13146000000	12867000000	12883000000	9883600000	12037000000	11816000000	1.12455e+10	1.14561
A0A1S4B3S0;A0A1S3ZQA2	ATP-dependent Clp protease ATP-binding subunit ClpA homolog CD4B, chloroplastic-like	LOC107804165	62	6	102.3			357740000	299790000	326690000	3.28073e+08	310440000	278930000	272140000	287170000	1.14244
A0A1S4BLV1;A0A1S3Y4Y9	ATP-dependent Clp protease ATP-binding subunit CLPT1, chloroplastic-like; uncharacterized protein LOC107772322	LOC107809674	31.9	5	25.971			523270000	567420000	568650000	5.53113e+08	638240000	666650000	597210000	6.34033e+08	0.872373
A0A1S3YXV1;A0A1S3Z496	ATP-dependent Clp protease ATP-binding subunit CLPT2, chloroplastic-like	LOC107780626	52.3	10	25.814			676020000	544250000	344200000	521490000	664160000	657470000	665470000	6.62367e+08	0.787313
A0A140G1U2	ATP-dependent Clp protease proteolytic subunit	clpP	32.7	4	22.082			584480000	671670000	703310000	6.53153e+08	380500000	547580000	488640000	472240000	1.3831
A0A1S3ZE64;A0A1S3XHP3	ATP-dependent Clp protease proteolytic subunit	LOC107785710;LOC10776536	37.6	10	34.051			646520000	732440000	766310000	715090000	655640000	662220000	661050000	6.59637e+08	1.08407
A0A1S4CH40;A0A1S4BMH5;A0A077DCK3	ATP-dependent Clp protease proteolytic subunit	LOC107818763;LOC10780986	25.3	5	32.267			656160000	623830000	617100000	6.32363e+08	433900000	598430000	633730000	5.55353e+08	1.13867
A0A1S4DLV7;A0A1S3YMX1	ATP-dependent Clp protease proteolytic subunit	LOC107831176;LOC10777795	19.6	4	36.162			242940000	227400000	265040000	2.45127e+08	196860000	209140000	221300000	209100000	1.17229
A0A1S4D9V6;A0A1S4BIE1	ATP-dependent Clp protease proteolytic subunit	LOC107827580;LOC10780862	19.9	4	32.929			160470000	148470000	174170000	1.61037e+08	127440000	156350000	165360000	1.49717e+08	1.07561
A0A1S4BSJ5;A0A1S4AVL7	ATP-dependent Clp protease proteolytic subunit	LOC107811365;LOC10780188	15.8	4	29.563			258930000	256740000	272110000	2.62593e+08	200890000	234620000	292320000	242610000	1.08237
A0A1S3XMM0;A0A1S3Y286	ATP-dependent Clp protease proteolytic subunit	LOC107766615;LOC10777124	14.5	5	42.485			250380000	267250000	281860000	2.66497e+08	209770000	261810000	224790000	2.32123e+08	1.14808
A0A1S4DNV5;A0A1S3ZU04	ATP-dependent Clp protease proteolytic subunit	LOC107831804;LOC10779038	21.5	5	33.214			221080000	253840000	235820000	2.36913e+08	153380000	203210000	221750000	192780000	1.22893
A0A1S3Z3S1;A0A1S3YB37	ATP-dependent Clp protease proteolytic subunit	LOC107782632;LOC10777423	13.8	4	32.223			226500000	227060000	269730000	2.41097e+08	196150000	224900000	189010000	2.03353e+08	1.1856
A0A1S3X2P4;A0A1S3YK58	ATP-dependent Clp protease proteolytic subunit	LOC107760634;LOC10777715	25.7	1	31.722			37110000	39812000	70920000	4.92807e+07	0	24584000	23620000	16068000	3.06701
A0A1S4BBV8;A0A1S4A824	ATP-dependent Clp protease proteolytic subunit	LOC107806708;LOC10779472	18.1	3	26.295			26865000	23289000	28579000	2.62443e+07	38006000	24623000	32102000	31577000	0.831122
A0A1S3Y0V4;A0A1S3XZ22	ATP-dependent Clp protease proteolytic subunit	LOC107770894;LOC10777039	13.5	2	26.446			19667000	20621000	22190000	20826000	34529000	0	31527000	2.20187e+07	0.945834
A0A1S4CA01;A0A1S3Y958;A0A1S3ZAM8	ATP-dependent RNA helicase A-like isoform X1; ribonuclease P protein subunit p25-like protein	LOC107816710;LOC107773675	6.4	2	34.27			48934000	56125000	44769000	4.99427e+07	66541000	50640000	62789000	59990000	0.832517
A0A1S4B4W4;A0A1S4DIV3	ATP-dependent zinc metalloprotease FTSH 11, chloroplastic/mitochondrial isoform X1	LOC107804496	8.9	5	86.59			40946000	43133000	52435000	4.55047e+07	43501000	32085000	27811000	3.44657e+07	1.32029
A0A1S4BF44;A0A1S4AHP3	ATP-dependent zinc metalloprotease FTSH 12, chloroplastic-like; ATP-dependent zinc metalloprotease FTSH 12, chloroplastic isoform X1	LOC107807608	2	1	98.557			0	15099000	35495000	1.68647e+07	0	9669600	0	3223200	5.23227
A0A1S3X9U6;A0A1S4A1C6;A0A1S3ZCB9;A0A1S4ACE3;A0A1S3YV36;A0A1S3XSW4;A0A1S3YIS7	ATP-dependent zinc metalloprotease FTSH 2, chloroplastic	LOC107762804	50.6	33	74.381			7035600000	6899300000	6863100000	6.93267e+09	6108700000	7037300000	7311100000	6.81903e+09	1.01666
A0A1S4D857;A0A1S4AC31	ATP-dependent zinc metalloprotease FTSH 6, chloroplastic-like	LOC107827004	8.2	1	73.068			0	0	0	0	0	257130000	0	85710000	0
A0A1S4CRH1;O82150	ATP-dependent zinc metalloprotease FTSH, chloroplastic	LOC107821735;FTSH	52.3	35	76.102			3375300000	3574500000	3608000000	3.51927e+09	2853200000	3304000000	3419500000	3.19223e+09	1.10245
A0A1S4B8T4	ATP-dependent zinc metalloprotease FTSH, chloroplastic	LOC107805643	49.9	2	76.149			0	32088000	26447000	1.95117e+07	16839000	21538000	26040000	2.14723e+07	0.908689
A0A1S4DML1	ATP-dependent zinc metalloprotease FTSH, chloroplastic-like	LOC107831424	49.5	6	76.632			357710000	332400000	339990000	3.43367e+08	289130000	326760000	337880000	3.17923e+08	1.08003
A0A1S4C8D8	ATP-dependent zinc metalloprotease FTSH, chloroplastic-like	LOC107816214	52.1	4	76.129			283680000	323660000	241370000	2.82903e+08	284800000	284790000	266520000	2.78703e+08	1.01507
A0A1S4CA29;P40691;A0A1S3XH43;A0A1S3YD91;A0A1S3Y490	auxin-induced protein PCNT115; Auxin-induced protein PCNT115	LOC107816763	10.8	1	38.557			28431000	28020000	22997000	2.64827e+07	29338000	33154000	29478000	3.06567e+07	0.863847
A0A1S3Y491;A0A1S3YDY7	auxin-induced protein PCNT115-like	LOC107772005;LOC107775053	13	4	38.035			33351000	27490000	37370000	32737000	40317000	39551000	41785000	40551000	0.807304
A0A1S4DJE8;A9YSI8	auxin-repressed 12.5 kDa protein-like; Auxin-repressed protein	LOC107830474;ARP1	13.3	1	13.061			12913000	14923000	11918000	1.32513e+07	16197000	14377000	15519000	1.53643e+07	0.862474
A0A1S4B2F2	BAHD acyltransferase DCR	LOC107803843	42	15	50.022			962910000	890710000	789500000	881040000	985080000	834080000	805930000	875030000	1.00687
A0A1S3Y635	BAHD acyltransferase DCR-like	LOC107772760	35.6	2	25.886			33674000	38399000	32761000	3.49447e+07	27978000	0	35147000	2.10417e+07	1.66074
A0A1S3Y567;A0A1S3Y235	bark storage protein A-like	LOC107772062;LOC107771344	4.7	1	37.432			0	0	0	0	0	0	0	0	#DIV/0!
A0A1S3X916	basic 7S globulin-like	LOC107762538	8.7	2	46.84			15117000	0	13586000	9.56767e+06	24705000	25628000	26296000	25543000	0.374571
A0A1S3XYK9	basic blue protein-like	LOC107770257	14.4	1	13.48			0	0	0	0	0	0	15518000	5.17267e+06	0
P29061;A0A1S4BF70;A0A1S4C0C3	Basic endochitinase; Chitinase	LOC107807601	23.8	5	32.393			92500000	72808000	88652000	8.46533e+07	144200000	148660000	89658000	127506000	0.663916
A0A1S3ZVW5	basic endochitinase-like	LOC107790992	43.5	4	16.82			54965000	40253000	58802000	51340000	54658000	56412000	45523000	5.21977e+07	0.983569
A0A1S4DE38	basic leucine zipper and W2 domain-containing protein 1-like	LOC107828816	17.8	1	34.886			43768000	0	0	1.45893e+07	40547000	53369000	0	3.13053e+07	0.466033
A0A1S3X8D5;A0A1S4AHS0;A0A1S4CRC7;A0A1S4AVC0	basic leucine zipper and W2 domain-containing protein 2-like	LOC107762222	20.2	7	46.982			105850000	121690000	121710000	1.16417e+08	99841000	118700000	115390000	1.1131e+08	1.04587
A0A1S4DPH0	Beta-adaptin-like protein	LOC107832035	6.6	5	99.818			50041000	43369000	57217000	50209000	55567000	63092000	65664000	61441000	0.81719
A0A1S4CPM3;A0A1S3YAZ4	Beta-adaptin-like protein	LOC107821274;LOC107774205	5	3	93.213			17054000	17717000	0	1.15903e+07	0	14418000	0	4806000	2.41164
A0A1S4B9A2	Beta-adaptin-like protein	LOC107805886	6.3	1	85.619			0	0	5036600	1.67887e+06	5596100	0	21424000	9006700	0.186402
A0A1S4BFN8;A0A1S4AZI5	Beta-amylase	LOC107807721;LOC107802870	5.2	3	65.055			15518000	11009000	14837000	13788000	16036000	16704000	19858000	1.75327e+07	0.786418
A0A1S3X092;A0A1S3ZLL4	beta-carotene isomerase D27, chloroplastic-like	LOC107759732;LOC107788	2.8	1	31.768			43139000	54904000	41068000	4.63703e+07	50065000	49539000	71306000	56970000	0.813943
A0A1S4AU60;A0A1S4ATM7;A0A1S4AT84	beta-D-glucosyl crocetin beta-1,6-glucosyltransferase-like	LOC107801257	5.5	1	23.199			0	0	0	0	0	0	22017000	7339000	0
A0A1S4BNE0	Beta-fructofuranosidase	LOC107810155	21.2	10	71.11			592600000	547870000	543650000	5.61373e+08	890160000	691090000	691300000	7.57517e+08	0.741071
Q8GUA3	Beta-fructofuranosidase	vi	18.8	2	71.243			0	0	0	0	0	0	13949000	4.64967e+06	0
A0A1S4BIA9;A0A1S4DEV0;A0A1S3ZVH4;A0A1S3X901;A0A1S4AVS9	beta-fructofuranosidase, insoluble isoenzyme 1-like	LOC107808557;L	4.5	3	65.792			97893000	99157000	90543000	9.58643e+07	93794000	105830000	99439000	9.96877e+07	0.961647
A0A1S4DH74;A0A1S3X7U9	beta-fructofuranosidase, insoluble isoenzyme CWINV1-like	LOC107829669	2.8	1	63.745			7544100	0	9583100	5.70907e+06	0	0	0	0	#DIV/0!
A0A1S4DQ09;A0A1S4APQ9	Beta-galactosidase	LOC107832203;LOC107800119	13	8	84.105			266660000	310280000	257380000	2.78107e+08	328570000	318000000	303440000	316670000	0.878222
A0A1S4B787	Beta-galactosidase	LOC107805179	5.9	5	125.82			60253000	90424000	72200000	7.42923e+07	67412000	72498000	60166000	66692000	1.11396
A0A1S4A9V4;A0A1S3Y3S6;A0A1S3ZUL7;A0A1S3X7C3	Beta-galactosidase	LOC107795322;LOC107771930	2.3	2	94.131			18506000	19934000	20206000	1.95487e+07	20902000	0	15285000	1.20623e+07	1.62064
A0A1S4CD47;A0A1S3XJ27	Beta-glucosidase	LOC107817549	15.1	6	65.693			133840000	132430000	145960000	137410000	127410000	140600000	138180000	1.35397e+08	1.01487
A0A1S3WXY4	Beta-glucosidase	LOC107759116	10.4	1	65.839			18048000	13455000	18871000	1.67913e+07	13602000	19617000	22840000	1.86863e+07	0.898589
A0A1S4AA13;A0A1S3ZH94;A0A1S4CPE1	beta-glucosidase 13-like isoform X2; vicianin hydrolase-like	LOC107795363;LOC107786749	22.4	10	58.723			245890000	257220000	267570000	2.56893e+08	283970000	286560000	297990000	2.89507e+08	0.887349
A0A1S4BY13;A0A1S3X805;A0A1S4DIG0;A0A1S4DKD1;A0A1S3XLV5;A0A1S4A6J3;A0A1S4DS22;A0A1S3YHT0	beta-glucosidase 18-like isoform X1; beta-glucosidase 18-like	LOC107813087;LOC107762201	7.6	3	65.136			40817000	39749000	35522000	38696000	69668000	52018000	53118000	58268000	0.664104
A0A1S4CQM1;A0A1S4BPL3;A0A1S4AKD6	beta-glucosidase BoGH3B-like	LOC107821430;LOC107810546	10.7	2	41.942			37226000	40432000	31807000	3.64883e+07	26377000	34188000	46538000	35701000	1.02205
A0A1S4BQK6;A0A1S3Z449	beta-glucosidase BoGH3B-like	LOC107810849;LOC107782809	5	1	68.699	+		0	0	0	0	42355000	0	0	1.41183e+07	0
A0A1S4CR57;O82151;A0A1S3XID4;A0A1S3YVW2;A0A1S4A8A6;A0A1S3Z8H9;A0A1S3YUX3	beta-glucosidase BoGH3B-like; Beta-D-glucan exohydrolase	LOC107821815;LOC107819408	28.2	12	68.447			505640000	448380000	434580000	4.62867e+08	482400000	396250000	441960000	4.40203e+08	1.05148
A0A1S4BW82;A0A1S3X3C4;A0A1S3YZ60	beta-glucosidase-like SFR2, chloroplastic	LOC107812522	17	9	73.268			156910000	157350000	131560000	1.48607e+08	162500000	161750000	176840000	167030000	0.8897
A0A1S4CPJ2;A0A1S4CLM5	Beta-hexosaminidase	LOC107821265;LOC107820274	5.2	3	61.541			30142000	40194000	23724000	3.13533e+07	40763000	30132000	45336000	3.87437e+07	0.809251
A0A1S4CNI7;A0A1S4B008	Beta-hexosaminidase	LOC107820709;LOC107803148	6.6	3	58.802			25272000	26033000	29710000	27005000	51354000	27683000	30188000	3.64083e+07	0.741726
A0A1S3Z3K0	betaine aldehyde dehydrogenase, chloroplastic-like	LOC107782625	16.3	1	55.497			23948000	24044000	34825000	2.76057e+07	25180000	26011000	32821000	28004000	0.985776
A0A1S4BSM8	betaine aldehyde dehydrogenase, chloroplastic-like isoform X1	LOC107811392	20.6	5	55.479			63999000	73364000	67787000	6.83833e+07	55531000	59685000	59179000	5.81317e+07	1.17635
A0A1S4BAR2;A0A0C4FSU4	betaine aldehyde dehydrogenase, chloroplastic-like; BADH2 protein	LOC107806351;BADH2	32.5	10	55.601			836490000	754900000	804490000	7.98627e+08	753790000	874420000	821700000	8.16637e+08	0.977946
A0A1S3Z8T0;A0A1S3XCY5	Beta-ketoacyl-[acyl-carrier-protein] synthase I	LOC107784232;LOC107763	19.4	4	50.011			103490000	155310000	127740000	1.28847e+08	100070000	124540000	155110000	1.26573e+08	1.01796
A0A1S3XF03	Beta-ketoacyl-[acyl-carrier-protein] synthase I	LOC107764303	6.3	2	53.126			22410000	16500000	19638000	19516000	20757000	18711000	19150000	1.95393e+07	0.998806
A0A1S4C5I3;A0A1S3X0M8;A0A1S4DHL8;H9CCH8	Beta-ketoacyl-[acyl-carrier-protein] synthase III	LOC107815403;LOC10	8.2	3	46.491			74497000	51917000	60796000	6.24033e+07	20367000	45805000	47889000	3.80203e+07	1.64131
A0A1S4DJL6	beta-xylosidase/alpha-L-arabinofuranosidase 2-like	LOC107830518	28	18	84.877			1237200000	1211800000	1292200000	1.24707e+09	1616100000	1425900000	1504300000	1.51543e+09	0.822911
A0A1S4CA17;A0A1S4BQD5;A0A1S3Z1K5;A0A1S4C5S1;A0A1S4CLW4	beta-xylosidase/alpha-L-arabinofuranosidase 2-like	LOC107816752	28.5	7	84.853			452380000	441510000	426190000	4.40027e+08	601120000	549170000	488810000	5.46367e+08	0.805369
A0A1S3XQ86;A0A1S3XGA2	beta-xylosidase/alpha-L-arabinofuranosidase 2-like	LOC107767521;LOC	4.2	2	85.132			8846800	9730000	10068000	9.54827e+06	13462000	8350800	9809900	10540900	0.90583
A0A1S3X2D6;A0A1S3ZWB9;A0A1S4A4K2;A0A1S3XPT5	bifunctional 3-dehydroquinate dehydratase/shikimate dehydrogenase, chloroplastic-like; Shikimate dehydrogenase (NADP(+))	LOC107760536	15.3	4	39.963			95024000	105510000	110540000	1.03691e+08	95950000	91658000	96548000	9.47187e+07	1.09473
A0A1S4ARS7;A0A1S4AUA9	bifunctional aspartate aminotransferase and glutamate/aspartate-prephenate aminotransferase	LOC107800597	18	6	51.238			123840000	140670000	135300000	133270000	154560000	127640000	134830000	139010000	0.958708
A0A1S4A693;A0A1S3ZKY2;A0A1S4A0N3;A0A1S3ZD68	bifunctional aspartokinase/homoserine dehydrogenase, chloroplastic-like	LOC107794170	26.2	18	100.41			515050000	531170000	513270000	519830000	388110000	411980000	517480000	439190000	1.18361
A0A1S3ZQY8;A0A1S3Y8B2;A0A1S3YSQ1	bifunctional D-cysteine desulfhydrase/1-aminocyclopropane-1-carboxylate deaminase, mitochondrial	LOC107789471	18.5	4	46.914			72357000	112840000	94188000	9.31283e+07	101310000	106860000	77937000	95369000	0.976505
A0A1S3YXZ4;A0A1S4C2F9	bifunctional dTDP-4-dehydrorhamnose 3,5-epimerase/dTDP-4-dehydrorhamnose reductase-like	LOC107780668	29.9	8	33.474			239680000	239770000	251750000	2.43733e+08	184420000	221150000	243640000	2.16403e+08	1.12629
A0A1S4BA03	bifunctional epoxide hydrolase 2-like	LOC107806029	27.4	6	36.529			209180000	191990000	184130000	195100000	112140000	141960000	166010000	1.40037e+08	1.39321
A0A1S4B673	bifunctional epoxide hydrolase 2-like	LOC107804911	24	2	36.632			95922000	99610000	93979000	9.65037e+07	62789000	66092000	84560000	71147000	1.3564
A0A1S3WXV2	bifunctional monothiol glutaredoxin-S16, chloroplastic-like	LOC107758982	33.9	8	32.964			403570000	392900000	407760000	401410000	442010000	400120000	415830000	419320000	0.957288
Q42966;A0A1S4DPD8;Q42965;A0A1S4B4I4	Bifunctional nitrilase/nitrile hydratase NIT4B; bifunctional nitrilase/nitrile hydratase NIT4B	NIT4B;LOC107832013	13.5	3	37.533			48202000	42807000	32261000	41090000	55184000	45300000	54053000	5.15123e+07	0.797673
A0A1S4D742;Q9FPL3	bifunctional purine biosynthesis protein PurH-like; Phosphoribosylaminoimidazolecarboxamide formyltransferase/IMP cyclohydrolase	LOC107826698	21.2	11	66.004			256980000	246160000	240370000	2.47837e+08	257700000	225890000	278040000	2.53877e+08	0.976209
A0A1S3Y3J6	binding partner of ACD11 1-like	LOC107771769	16.2	4	29.425			113550000	84881000	97895000	9.87753e+07	119510000	99933000	112420000	110621000	0.892917
A0A1S4CT85	binding partner of ACD11 1-like	LOC107822317	14.7	1	29.563			42524000	40881000	37279000	40228000	49464000	50753000	43547000	4.79213e+07	0.839459
A0A1S3ZMX9;A0A1S3XIR2	Biotin carboxyl carrier protein of acetyl-CoA carboxylase	LOC107788710	9.9	3	30.047			107110000	104230000	77191000	96177000	86552000	91799000	94703000	91018000	1.05668
A0A1S4BHS2;A0A1S4ALM6;A0A1S4AWJ7	Biotin carboxyl carrier protein of acetyl-CoA carboxylase	LOC107808419	17.7	2	27.516			84400000	69864000	80716000	7.83267e+07	68392000	65314000	73850000	6.91853e+07	1.13213
A0A1S3YSV5	biotin carboxyl carrier protein of acetyl-CoA carboxylase, chloroplastic-like isoform X1	LOC107779394	16.3	1	30.897			25952000	30396000	27951000	2.80997e+07	25967000	23149000	26505000	25207000	1.11476
A0A1S4A952	biotin carboxyl carrier protein of acetyl-CoA carboxylase-like isoform X1	LOC107795053	29.7	5	30.468			229450000	222870000	199470000	2.17263e+08	210040000	202440000	186610000	1.99697e+08	1.08797
A0A1S4DMC3;A0A1S4CSA3	biotin carboxyl carrier protein of acetyl-CoA carboxylase-like isoform X1	LOC107831120	8	2	29.175			78172000	81677000	69461000	7.64367e+07	63982000	79779000	69316000	7.10257e+07	1.07618
A0A1S4D758;A0A1S4AWE8	Biotin carboxylase	LOC107826689;LOC107802092	43.3	16	58.453			1135400000	1168700000	1184600000	1162900000	1001600000	1107000000	1067600000	1.05873e+09	1.09839
A0A1S4BLA4	Biotin synthase	LOC107809497	7.7	2	42.034			143190000	70053000	101430000	104891000	90449000	86283000	110560000	95764000	1.09531
A0A1S3X699	Biotin synthase	LOC107761704	5.9	1	41.885	+		0	0	0	0	0	0	0	0	#DIV/0!
A0A1S4CTD1	blue copper protein-like	LOC107822452	7.1	1	34.55			0	0	0	0	0	0	0	0	#DIV/0!
A0A1S4CZS6;A0A1S3Y7X1;A0A1S4D1X8	Branched-chain-amino-acid aminotransferase; branched-chain-amino-acid aminotransferase 5, chloroplastic-like	LOC107824411	11.7	4	45.225			125920000	145620000	197160000	1.56233e+08	148400000	237840000	128250000	1.71497e+08	0.910999
A0A1S4BP94;A0A1S4DME6	brefeldin A-inhibited guanine nucleotide-exchange protein 2-like	LOC107810397	4.7	7	198.78			37675000	26914000	48965000	3.78513e+07	31647000	33247000	27573000	3.08223e+07	1.22805
A0A1S3X5G4;A0A1S4C210	brefeldin A-inhibited guanine nucleotide-exchange protein 5-like	LOC107761455	2.4	3	193.04			32271000	28996000	35530000	3.22657e+07	30503000	23784000	37786000	30691000	1.05131
A0A1S3X9W3	BSD domain-containing protein 1-like	LOC107762842	10.2	3	62.255			0	21046000	16357000	1.24677e+07	29240000	31059000	0	2.00997e+07	0.620292
A0A1S3ZKU8	caffeic acid 3-O-methyltransferase	LOC107788038	28.7	8	39.61			96274000	95898000	114810000	1.02327e+08	65731000	106110000	89854000	8.72317e+07	1.17305
A0A1S4BGK6;A0A1S4A9J0;A0A1S3XCS3;A0A1S4BLL5	caffeic acid 3-O-methyltransferase-like	LOC107808034;LOC107795225	6.1	2	40.015			5200300	0	0	1.73343e+06	0	8723800	0	2.90793e+06	0.596105
A0A1S3YYX5;A0A1S3Y041;A0A1S3ZN81;A0A1S3XGS5;M4N6Y7;A0A1S3ZUM3	calcineurin B-like protein 3 isoform X2; calcineurin B-like protein 3	LOC107781368;LOC107770660	11.2	2	22.248			25094000	28030000	26156000	2.64267e+07	39018000	33391000	36210000	3.62063e+07	0.729891
A0A1S4CK71	Calcium load-activated calcium channel	LOC107819946	11.7	2	20.879			0	12133000	14680000	8.93767e+06	9522700	7762700	0	5761800	1.55119
A0A1S3Z100	calcium sensing receptor, chloroplastic-like	LOC107781793	50.3	16	41.904			2242800000	2158300000	2182600000	2.19457e+09	1833000000	1915500000	2139600000	1962700000	1.11814
A0A1S4ARQ1	calcium sensing receptor, chloroplastic-like	LOC107800572	46.5	3	42.322			628780000	722640000	558380000	636600000	650270000	574330000	721580000	6.48727e+08	0.981307
A0A1S3XU16;A0A1S4BWY5	calcium-binding allergen Ole e 8-like	LOC107768745;LOC107812761	20.4	2	17.281			36730000	37316000	54458000	4.28347e+07	52727000	61418000	51881000	55342000	0.773999
A0A1S4CEY9;Q93YF3;A0A1S4B281	calcium-dependent protein kinase 1-like; Calcium-dependent protein kinase 3	LOC107818104;cdpk3	4.2	2	64.536			1445700000	1641100000	1548900000	1.54523e+09	1815100000	1790900000	1971300000	1859100000	0.831173
A0A1S4BCT9;A0A1S4B7X6	calcium-dependent protein kinase 2-like	LOC107806884;LOC107805386	2.5	1	57.821			12153000	23567000	27771000	2.11637e+07	13652000	14569000	22017000	16746000	1.2638
A0A1S4DGX2;A0A1S4AN00	calcium-dependent protein kinase 2-like	LOC107829574;LOC107799491	2.5	1	58.184			4376100	7480700	11486000	7.78093e+06	0	0	0	0	#DIV/0!
A0A1S4DNJ5;A0A1S3ZU53	calcium-dependent protein kinase 3-like	LOC107831716;LOC107790512	5.4	2	57.658			0	5711800	10019000	5243600	6336900	7777200	9744100	7.95273e+06	0.659346
A0A1S4DRL4;A0A1S4BEQ8;A0A1S3X3W2;A0A1S3ZRG7	calcium-dependent protein kinase 5-like	LOC107832719;LOC107807483	4.6	1	46.06			17889000	0	20816000	1.29017e+07	0	0	15284000	5.09467e+06	2.53239
A0A1S3XNF9	calcium-dependent protein kinase SK5-like	LOC107766827	6.2	1	55.771			0	0	0	0	0	0	8524300	2.84143e+06	0
A0A1S4BDN1;A0A1S3Z055	calcium-transporting ATPase 4, endoplasmic reticulum-type-like	LOC107807149	10	7	116.41			98052000	112290000	97955000	1.02766e+08	87140000	76380000	114120000	9.25467e+07	1.11042
A0A1S3ZIH2	Calcyclin-binding protein	LOC107787168	8.7	1	24.678			0	0	0	0	0	0	0	0	#DIV/0!
Q76MF4	Calmodulin	NtCaM2	63.8	1	16.932			250320000	255110000	236200000	247210000	277930000	233590000	207560000	2.39693e+08	1.03136
Q76ME6;A0A1S4CZY0	Calmodulin NtCaM10; calmodulin-5-like	NtCaM10;LOC107824434	88.6	1	16.833			50472000	52227000	43592000	4.87637e+07	59162000	52564000	55020000	55582000	0.877328
Q76MF3;A0A1S3YRZ7;A0A1S4BYL5;A0A1S4D965	Calmodulin NtCaM11; calmodulin-7-like isoform X3	NtCaM3;LOC107779166	88.6	13	16.848			2343200000	2243200000	2113700000	2.23337e+09	2538100000	2697200000	2439400000	2.55823e+09	0.873011
A0A1S4C120;A0A1S4B4Y2;A0A1S4DLH5;A0A1S3Y1X4;A0A1S3X1W4	calmodulin-binding protein 60 B-like	LOC107813930;LOC107804452	3	2	71.668			0	0	0	0	12757000	8531200	0	7.09607e+06	0
A0A1S3XCV7;A0A1S3ZB35	calmodulin-like	LOC107763754	63.8	3	16.906			161130000	161700000	140960000	1.54597e+08	174190000	175690000	164240000	1.71373e+08	0.902105
A0A1S3Y944	calnexin homolog 1-like	LOC107773601	33	16	61.23			2072500000	1893100000	1858300000	1941300000	2012500000	1896400000	1728100000	1879000000	1.03316
A0A1S4D9U8	calnexin homolog 1-like	LOC107827548	28.2	3	61.244			217950000	224450000	225290000	2.22563e+08	230850000	198750000	185820000	205140000	1.08493
A0A1S4CT76	calnexin homolog 1-like	LOC107822295	30.1	2	61.549			151210000	137500000	94921000	127877000	142250000	111040000	131820000	128370000	0.99616
A0A1S3Y4Y6	calnexin homolog 1-like	LOC107772248	24.9	1	60.999			50097000	50182000	46504000	4.89277e+07	49173000	58996000	39739000	4.93027e+07	0.992394
A0A1S4C341	Calreticulin	LOC107814655	55	20	47.563			2651800000	2615900000	2485900000	2.58453e+09	2931300000	2571400000	2555900000	2686200000	0.962152
A0A1S3X6G9	Calreticulin	LOC107761714	46.4	1	48.788			116650000	117230000	130500000	121460000	99790000	102360000	94545000	9.88983e+07	1.22813
A0A1S3YUR4;A0A1S3YJY7;A0A1S3XVS8;A0A1S4BJV9	Calreticulin	LOC107779794;LOC107776924	12.2	3	50.121			23247000	21062000	32398000	25569000	24207000	30232000	21944000	25461000	1.00424
A0A1S4ALW6	calvin cycle protein CP12-1, chloroplastic-like	LOC107799104	52.3	11	14.258			11602000000	11888000000	12050000000	1.18467e+10	15658000000	12123000000	14001000000	1.39273e+10	0.850606
A0A1S4B8C3;A0A1S3XX83	calvin cycle protein CP12-2, chloroplastic-like	LOC107805556;LOC107769	51.9	6	13.882			1235800000	1156300000	1023500000	1.13853e+09	1642700000	1449600000	1285400000	1.45923e+09	0.780227
A0A1S4CVN6;A0A1S3XK32	calvin cycle protein CP12-3, chloroplastic-like	LOC107823204;LOC107766	10.6	1	13.692			42017000	38845000	41446000	4.07693e+07	49256000	60750000	41192000	5.03993e+07	0.808926
A0A1S4CW91	Carbamoyl-phosphate synthase (glutamine-hydrolyzing)	LOC107823266	15.7	18	131.52			400300000	505770000	429480000	4.45183e+08	362690000	381280000	438360000	394110000	1.12959
A0A1S3XU44	Carbonic anhydrase	LOC107768773	74.5	22	35.899			68330000000	73292000000	72454000000	7.13587e+10	53262000000	65149000000	69281000000	62564000000	1.14057
A0A1S3X5I0;A0A077DCK9;A0A1S3Y8Y0;A0A1S3XUX9;A0A1S4BBI5;A0A1S3XBR6;A0A1S4D862;A0A1S4C6R2;A0A1S3XR71;A0A1S4BVJ5	Carbonic anhydrase	LOC107761423;LOC107821152	49.4	10	29.49			869050000	875610000	928720000	8.91127e+08	885880000	981410000	1001600000	9.56297e+08	0.931852
A0A1S4B3H8	Carbonic anhydrase	LOC107804047	15.6	3	30.603			41230000	43821000	48757000	4.46027e+07	40911000	49876000	54531000	4.84393e+07	0.920794
P27141;A0A1S4CU20	Carbonic anhydrase, chloroplastic; Carbonic anhydrase	LOC107822687	72.9	4	34.51			8111900000	8908200000	7839400000	8286500000	7738600000	8835700000	9251000000	8.60843e+09	0.962603
A0A1S4C612;A0A1S3X8T4	carboxyl-terminal-processing peptidase 2, chloroplastic-like	LOC107815466	10.9	4	60.099			26994000	23828000	21411000	2.40777e+07	31723000	30159000	23480000	28454000	0.846196
A0A1S3YM75;A0A1S3X5G0	carboxymethylenebutenolidase homolog	LOC107777505;LOC107761401	3.6	1	33.584			18390000	21874000	14660000	18308000	25060000	16442000	23490000	21664000	0.845089
A0A1S4DLM9;A0A1S4C4R0	Carboxypeptidase	LOC107831113;LOC107815153	40.9	13	52.985			579720000	563460000	531530000	5.58237e+08	539860000	548120000	637870000	5.75283e+08	0.970368
A0A1S4BYQ8	Carboxypeptidase	LOC107813306	25.1	12	56.3			490830000	478020000	477090000	481980000	621320000	534100000	529610000	5.61677e+08	0.858109
A0A1S4CSI9	Carboxypeptidase	LOC107822067	22.8	3	56.186			107150000	80882000	71597000	86543000	0	0	69476000	2.31587e+07	3.73696
A0A1S3XB37;A0A1S3Y6K4;A0A1S3ZF69	Carboxypeptidase	LOC107763201;LOC107772572	12.3	4	56.065			81664000	78414000	67242000	7.57733e+07	110620000	72640000	89277000	9.08457e+07	0.834089
A0A1S4CS57;A0A1S4BCX6	Carboxypeptidase	LOC107822114;LOC107806959	10.7	4	52.002			72073000	65311000	67446000	6.82767e+07	64292000	72215000	54548000	63685000	1.0721
A0A1S4BLC8;A0A1S3XTW0	Carboxypeptidase	LOC107809537;LOC107768692	8.2	1	40.24			0	0	10413000	3471000	0	0	0	0	#DIV/0!
A0A1S4AFJ7;A0A1S3X8J3	Carboxypeptidase	LOC107797071;LOC107762483	5.4	2	56.457			6342300	4504700	0	3.61567e+06	0	0	0	0	#DIV/0!
A0A1S4BZ46;A0A1S4B6K0	Carboxypeptidase	LOC107813418;LOC107805016	3.2	1	56.213			0	0	9347900	3.11597e+06	13174000	11201000	0	8125000	0.383504
A0A1S4AFI2;A0A1S3X6T0	carotene epsilon-monooxygenase, chloroplastic-like	LOC107797056;LOC	21.9	8	60.832			101380000	118290000	110690000	110120000	81105000	102420000	98203000	9.39093e+07	1.17262
A0A0A7AF85;A0A0A7AEZ2;A0A1S4CCB0	Carotenoid cleavage dioxygenase 1-1; Carotenoid cleavage dioxygenase 1-2	CCD1-1;CCD1-2	23.5	6	61.006			142280000	137270000	117080000	132210000	149960000	142350000	153100000	148470000	0.890483
A0A0N7CV06;A0A1S4CBA1	Carotenoid cleavage dioxygenase 1-3; carotenoid 9,10(9,10)-cleavage dioxygenase 1-like isoform X2	CCD1;LOC107817154	24.9	11	61.079			365190000	327490000	334400000	342360000	430750000	395150000	386500000	4.04133e+08	0.847146
Q8LP30;A0A1S4DQ21;Q70Z25;Q70Z24	Casein kinase 2 catalytic subunit; casein kinase II subunit alpha-like	NtCK2a1;LOC107832227	6.9	2	39.389			20093000	22732000	19598000	2.08077e+07	17033000	0	0	5.67767e+06	3.66483
L0SQ20;A0A1S3WYX0	Catalase	cat1	63.4	26	56.823			7942700000	8191800000	8072300000	8.06893e+09	9081000000	9855600000	8830700000	9.25577e+09	0.871774
A0A1S4D605	Catalase	LOC107826360	60	23	56.824			3587100000	3925800000	3805800000	3772900000	3253000000	3526000000	3559900000	3446300000	1.09477
A0A1S3ZFE6;P49319	Catalase; Catalase isozyme 1	LOC107786140;CAT-1	60	1	56.852			126720000	0	0	42240000	116590000	0	143200000	8.65967e+07	0.487779
A0A1S3YVF2	Catechol oxidase	LOC107780127	20.2	10	66.685			632780000	691750000	638990000	6.54507e+08	666070000	675320000	637570000	6.59653e+08	0.992198
A0A1S3ZQP6	Catechol oxidase	LOC107789348	29.5	11	67.604			501880000	466230000	451510000	4.73207e+08	807830000	753390000	760400000	7.73873e+08	0.611478
A0A1S3Y7P7	Catechol oxidase	LOC107773093	21.8	3	67.461			22664000	17284000	18231000	19393000	73501000	53894000	45650000	5.76817e+07	0.336207
A0A1S4D1N7	Catechol oxidase	LOC107824883	11.9	1	67.263			0	0	0	0	0	0	0	0	#DIV/0!
A0A1S3Z6B3;A0A1S4DJS1	cathepsin B-like	LOC107783298;LOC107830479	20.3	5	39.144			225930000	207110000	212300000	2.15113e+08	214840000	221730000	202510000	2.13027e+08	1.0098
A0A1S4DJF0;A0A1S3Z5T3	cathepsin B-like	LOC107830480;LOC107783297	14.3	2	39.597			0	30004000	19828000	1.66107e+07	36304000	28266000	31293000	3.19543e+07	0.519825
A0A1S3ZTK5	CBS domain-containing protein CBSX1, chloroplastic-like	LOC107790338	31.6	7	25.455			485840000	483820000	516600000	495420000	536780000	519390000	549560000	5.35243e+08	0.925598
A0A1S4B1Q8;A0A1S3ZAD8	CBS domain-containing protein CBSX1, chloroplastic-like	LOC107803496	21.7	4	26.191			70730000	76415000	74942000	74029000	91260000	85589000	90226000	89025000	0.831553
A0A1S3X0X9	CBS domain-containing protein CBSX1, chloroplastic-like	LOC107759844	31.6	1	25.417			27389000	22715000	26096000	25400000	31039000	30909000	33171000	3.17063e+07	0.801102
A0A1S4AFR6	CBS domain-containing protein CBSX1, chloroplastic-like isoform X1	LOC107797159	17.5	1	25.438			0	0	109200000	36400000	0	95686000	0	3.18953e+07	1.14123
A0A1S3XQ99	CBS domain-containing protein CBSX3, mitochondrial-like	LOC107767529	36.6	7	22.545			372780000	364040000	348340000	361720000	327930000	324740000	344600000	3.32423e+08	1.08813
A0A1S4CJ83;A0A1S4AEC0	CCG-binding protein 1-like	LOC107819469;LOC107796746	5.8	1	23.133			18710000	16467000	18030000	1.77357e+07	23209000	18079000	14846000	1.87113e+07	0.947857
A0A1S3Y793;A0A1S4DAK3	CCR4-NOT transcription complex subunit 10-like	LOC107773111;LOC10782774	3.4	2	93.828			0	6947700	5906600	4.28477e+06	0	7056100	4338500	3798200	1.1281
A0A1S4B6M4;A0A1S4AY63	CCR4-NOT transcription complex subunit 1-like isoform X1; CCR4-NOT transcription complex subunit 1-like	LOC107804987;LO	1.1	2	266.33			0	0	5833700	1.94457e+06	0	0	5319000	1773000	1.09677
A0A1S4D3T4;A0A1S4AA99;A0A1S4C1H8;A0A1S4B696;A0A1S3ZMF3	CCT-beta	LOC107825698;LOC107795385	33.1	13	57.07			648860000	612630000	662200000	641230000	558080000	634100000	680460000	6.24213e+08	1.02726
A0A1S4ATN8;A0A1S3XW41	CCT-eta	LOC107801176;LOC107769239	25.4	12	60.255			354660000	369640000	347330000	357210000	301000000	347450000	336130000	3.28193e+08	1.08841
A0A1S3ZQJ0	CCT-theta	LOC107789350	38.4	16	58.153			738170000	664550000	737900000	713540000	592560000	629200000	641930000	621230000	1.14859
A0A1S3ZTZ0	CDGSH iron-sulfur domain-containing protein NEET-like	LOC107790463	54.1	4	10.534			446160000	420940000	419550000	4.28883e+08	660530000	498530000	514870000	5.57977e+08	0.76864
A0A1S4B2J5	CDGSH iron-sulfur domain-containing protein NEET-like	LOC107803753	57.1	1	10.592			34212000	81048000	56575000	5.72783e+07	75363000	57048000	76369000	6.95933e+07	0.823043
A0A1S4CC76	cell division cycle protein 48 homolog	LOC107817432	40.5	7	89.385			434660000	468460000	484240000	4.62453e+08	478610000	411140000	450550000	4.46767e+08	1.03511
A0A1S4AYQ8	cell division cycle protein 48 homolog	LOC107802633	20.1	1	89.959			184840000	141120000	150270000	1.58743e+08	206110000	127930000	154810000	162950000	0.974184
A0A1S3ZVE8;A0A1S3XUB0	cell division cycle protein 48 homolog	LOC107790858;LOC107768884	36.6	1	89.775			17919000	0	21809000	1.32427e+07	0	0	0	0	#DIV/0!
A0A1S4B8U9;A0A1S3ZXX3	cell division cycle protein 48 homolog; cell division cycle protein 48 homolog isoform X1	LOC107805784;LOC107791620	38.6	29	89.556			2052700000	2062100000	2103600000	2072800000	2171600000	1836300000	1975100000	1.99433e+09	1.03934
A0A1S4B341;A0A1S4AGR7	cell division protein FtsY homolog, chloroplastic-like	LOC107804044	12.1	4	40.113			108440000	113400000	81947000	1.01262e+08	78547000	113270000	88868000	9.35617e+07	1.08231
A0A1S4BGG0;A0A1S3Y657	cell division protein FtsZ homolog 1, chloroplastic-like	LOC107807998	15.2	2	33.827			49710000	36377000	37181000	4.10893e+07	42653000	35915000	43406000	40658000	1.01061
A0A1S4DEH2	cell division protein FtsZ homolog 2-1, chloroplastic-like	LOC107828870	27.8	5	50.407			98055000	30624000	193730000	1.0747e+08	45017000	19776000	55217000	4.00033e+07	2.68652
A0A1S4ANY9	cell division protein FtsZ homolog 2-1, chloroplastic-like	LOC107799818	26.2	1	50.344			0	16360000	13927000	1.00957e+07	0	0	22432000	7.47733e+06	1.35017
Q3Y6V1;A0A1S4BZ11	Cellulose synthase-like protein CslG; LOW QUALITY PROTEIN: cellulose synthase-like protein G3	LOC107797779;LOC107813389	1.7	1	84.854			0	0	0	0	0	0	0	0	#DIV/0!
Q33DL3;A0A1S3YTT1	Chalcone--flavanone isomerase; Chalcone-flavonone isomerase family protein	CHI;LOC107779699	17.2	3	26.426			49514000	52830000	45798000	4.93807e+07	67422000	49119000	42983000	5.31747e+07	0.92865
A0A1S4AER1;A0A1S3YG42	Chalcone-flavonone isomerase family protein	LOC107796846;LOC107775821	11.7	3	30.548			84044000	68326000	93853000	8.20743e+07	97077000	80285000	73287000	8.35497e+07	0.982342
A0A1S4D3L8	Chalcone-flavonone isomerase family protein	LOC107825576	10.2	1	26.676			24333000	22357000	26030000	24240000	22423000	45568000	27252000	3.17477e+07	0.763521
A0A1S4BPK2;A0A1S3XY22	Chalcone-flavonone isomerase family protein	LOC107810515;LOC107770091	15.7	2	23.633			20667000	24104000	22913000	2.25613e+07	27124000	26746000	22329000	2.53997e+07	0.888253
A0A1S3YLL8;A0A1S4CAS7;A0A1S3ZMR8;A0A1S4C161;A0A1S4CF57	chaperone protein ClpB3, chloroplastic-like	LOC107777392;LOC107817067	41.3	34	109.71			1077300000	1041200000	1141100000	1.08653e+09	1226300000	1115300000	1087600000	1.14307e+09	0.950542
A0A1S4CLW9;A0A1S4AFU6;A0A1S3YLS7;A0A1S4DKC4	chaperone protein dnaJ A6, chloroplastic-like	LOC107820445;LOC107797147	23.4	10	47.84			563030000	636810000	590360000	5.96733e+08	196390000	242070000	254860000	2.31107e+08	2.58207
A0A1S3Y6C2	chaperone protein DnaJ-like	LOC107772764	9.3	4	54.276			72710000	61442000	52906000	6.23527e+07	46567000	55543000	52484000	5.15313e+07	1.21
A0A1S4DCN5	chaperone protein DnaJ-like	LOC107828423	9.3	1	54.636			13270000	11660000	0	8310000	10930000	9161800	10263000	1.01183e+07	0.821287
A0A1S4BNP6	chaperonin 60 subunit beta 2, chloroplastic	LOC107810219	72.5	46	63.166			84577000000	73727000000	74158000000	7.74873e+10	27451000000	23956000000	24804000000	2.54037e+10	3.05024
A0A1S4AHG8;REV__A0A1S3X4D2	chaperonin 60 subunit beta 2, chloroplastic-like	LOC107797700	67.3	2	63.205			1278000000	1397800000	1103900000	1259900000	1448400000	1300500000	1149600000	1299500000	0.969527
A0A1S3XY51	chaperonin CPN60-2, mitochondrial	LOC107770118	60.2	1	61.305			28550000	17484000	19539000	2.18577e+07	29461000	27431000	29712000	28868000	0.757159
A0A1S4D2P7;A0A1S3XRJ7	chaperonin CPN60-2, mitochondrial-like	LOC107825374	61.6	30	61.356			2052600000	1970300000	2016400000	2013100000	2329400000	2116500000	2102400000	2.18277e+09	0.92227
A0A1S3Z427;A0A1S4A7X9	chaperonin CPN60-2, mitochondrial-like	LOC107782773;LOC107794731	53.8	14	61.051			1954900000	1783900000	1835800000	1858200000	2096600000	1880100000	2042700000	2.00647e+09	0.926106
Q9ZWS3	Chitinase 134	Chn134	18.1	1	29.203			0	0	0	0	0	0	0	0	#DIV/0!
A0A1S4AG99	chitinase-like protein 1	LOC107797098	4.3	1	35.915			10255000	13902000	11170000	1.17757e+07	0	0	20747000	6.91567e+06	1.70275
A0A1S4BUP5;Q43576;A0A1S4A391;A0A1S4C457	chitotriosidase-1-like; Chitinase, class V	LOC107812074;chi-V	21.7	7	42.006			194640000	176530000	221040000	1.97403e+08	219110000	184570000	197580000	200420000	0.984948
P27493;A0A1S3YD73;P27495;A0A1S3Y820	Chlorophyll a-b binding protein 21, chloroplastic; Chlorophyll a-b binding protein, chloroplastic	CAB21;LOC107775016	64.5	10	28.126			10211000000	9493300000	10555000000	1.00864e+10	8191800000	9617200000	10823000000	9544000000	1.05684
P27494;A0A1S4BMB0;A0A1S3ZVQ8;A0A1S3ZSU2;A0A1S3YPE9;A0A1S3ZVR6;A0A1S4A8I3	Chlorophyll a-b binding protein 36, chloroplastic; Chlorophyll a-b binding protein, chloroplastic	CAB36;LOC107809852	38.5	4	28.638			5478200000	4758000000	4938500000	5.05823e+09	2312400000	3036700000	2851600000	2.73357e+09	1.85042
P27496;A0A1S3Y8Q2	Chlorophyll a-b binding protein 50, chloroplastic; Chlorophyll a-b binding protein, chloroplastic	CAB50;LOC107773487	63.3	1	28.347			74915000	71045000	60372000	6.87773e+07	60269000	72659000	76748000	69892000	0.984052
A0A1S4CEW8	Chlorophyll a-b binding protein, chloroplastic	LOC107818087	62.8	18	30.413			27395000000	26734000000	26619000000	26916000000	21024000000	23079000000	24998000000	2.30337e+10	1.16855
A0A1S3YAU9	Chlorophyll a-b binding protein, chloroplastic	LOC107774251	48.6	16	31.052			9335200000	90036000000	9135800000	36169000000	7899400000	8857600000	9515800000	8757600000	4.13001
A0A1S4DDG4;A0A1S4C6X0;A0A1S4CEK4;A0A1S4BNY0	Chlorophyll a-b binding protein, chloroplastic	LOC107828640;LOC10781575	35.1	10	26.261			4628300000	4687100000	4500300000	4.60523e+09	3860100000	4807900000	4021700000	4229900000	1.08873
A0A1S4CBW5;A0A1S3ZA20	Chlorophyll a-b binding protein, chloroplastic	LOC107817323;LOC10778462	44.3	9	29.188			4545600000	5207100000	5901800000	5.21817e+09	3062800000	4222400000	4151700000	3812300000	1.36877
Q0PWS6	Chlorophyll a-b binding protein, chloroplastic	Lhcb6	53.7	9	27.334			4837600000	4996000000	4601300000	4.81163e+09	3327600000	3606900000	3985900000	3.64013e+09	1.32183
Q0PWS5	Chlorophyll a-b binding protein, chloroplastic	Lhcb5	62.8	2	30.447			2801400000	2509600000	2504900000	2605300000	2130100000	2370400000	2596200000	2.36557e+09	1.10134
A0A1S3Y974	Chlorophyll a-b binding protein, chloroplastic	LOC107773808	63.3	2	28.293			2416000000	2251900000	2725100000	2.46433e+09	1793100000	2110500000	3029600000	2.31107e+09	1.06632
A0A1S4AFM6;A0A1S4DP86;A0A1S4CIK5;A0A1S3WXV6	Chlorophyll a-b binding protein, chloroplastic	LOC107796964;LOC10783195	27.5	4	28.744			1517700000	1527700000	1365600000	1.47033e+09	1334000000	1578000000	1623700000	1511900000	0.972507
A0A1S4DJK0	Chlorophyll a-b binding protein, chloroplastic	LOC107830507	53.7	2	27.32			9461200000	8595500000	7176100000	8.41093e+09	209760000	1090500000	1400900000	9.00387e+08	9.34147
A0A1S4DJK1	Chlorophyll a-b binding protein, chloroplastic	LOC107830508	40.6	3	27.311			1710600000	1648000000	2359400000	1906000000	1586800000	1592400000	1849600000	1.67627e+09	1.13705
A0A1S4DIE1;A0A076L1Y1;A0A1S3XHK0;A0A1S3ZYT5	Chlorophyll a-b binding protein, chloroplastic	LOC107830195;LOC10779320	43.5	5	28.316			1039900000	1270300000	1191400000	1167200000	891590000	1225000000	1170600000	1095730000	1.06523
A0A1S4AKK6	Chlorophyll a-b binding protein, chloroplastic	LOC107798677	48.4	3	31.123			771690000	694240000	561100000	6.75677e+08	812230000	763050000	668400000	7.47893e+08	0.90344
A0A1S3YD75	Chlorophyll a-b binding protein, chloroplastic	LOC107774933	49	7	27.699			874440000	829670000	743220000	8.15777e+08	599030000	806130000	843940000	749700000	1.08814
A0A1S3YYT8	Chlorophyll a-b binding protein, chloroplastic	LOC107781331	44.3	1	29.426			336940000	415000000	499440000	4.17127e+08	149920000	298700000	170580000	206400000	2.02096
A0A1S4C053	Chlorophyll a-b binding protein, chloroplastic	LOC107813664	44.3	1	29.343			358760000	183130000	281710000	2.74533e+08	158390000	174540000	257120000	1.96683e+08	1.39581
A0A1S3Y100;A0A1S4BC47	Chlorophyll a-b binding protein, chloroplastic	LOC107770844;LOC10780678	63.3	1	28.353			793520000	758450000	755750000	769240000	160000000	200550000	212460000	1.91003e+08	4.02736
A0A1S4BPJ2;A0A1S4BPM1;A0A1S4BPJ4;A0A1S3Y6U0	Chlorophyll a-b binding protein, chloroplastic	LOC107810529;LOC10781052	64.5	1	28.197			213740000	379520000	359400000	3.17553e+08	116140000	178170000	152180000	148830000	2.13366
A0A1S4BG25	Chlorophyll a-b binding protein, chloroplastic	LOC107807890	64.5	2	28.104			90774000	103690000	96842000	97102000	78705000	125780000	96802000	100429000	0.966872
A0A1S4BSH6	Chlorophyll a-b binding protein, chloroplastic	LOC107811419	39.4	1	27.688			102500000	130260000	121960000	118240000	90298000	166280000	192280000	1.49619e+08	0.790272
A0A1S4DJQ0	Chlorophyll a-b binding protein, chloroplastic	LOC107830543	39.4	3	27.449			924590000	99182000	904460000	642744000	63611000	77967000	92898000	7.81587e+07	8.22358
A0A1S4BG28	Chlorophyll a-b binding protein, chloroplastic	LOC107807891	53.6	1	28.13			31144000	36997000	39403000	35848000	21947000	32325000	35553000	2.99417e+07	1.19726
A0A1S4C6Q9;A0A1S3ZCM1	Chlorophyll a-b binding protein, chloroplastic	LOC107815659;LOC10778537	3.8	1	28.863			0	0	0	0	0	0	0	0	#DIV/0!
A0A1S4BG47;A0A1S3Y6G2	Chlorophyll a-b binding protein, chloroplastic	LOC107807889	64.5	1	28.116			0	73248000	0	24416000	0	90991000	84577000	5.85227e+07	0.417206
A0A1S3Y6H9;P27491;A0A1S3ZYV8	Chlorophyll a-b binding protein, chloroplastic; Chlorophyll a-b binding protein 7, chloroplastic	LOC107772871;CAB7	72.5	1	24.981			2329700000	0	0	7.76567e+08	0	0	0	0	#DIV/0!
A0A1S4A8N8;A0A1S3Z1E0	chlorophyll synthase, chloroplastic-like	LOC107794961;LOC107781977	10.5	2	40.31			91825000	80568000	92088000	8.81603e+07	71289000	87986000	89195000	8.28233e+07	1.06444
J9PVL4	Chloroplast geranylgeranyl diphosphate synthase 3	GGPPS3	19	3	39.535			33827000	38366000	26306000	32833000	41344000	41651000	31642000	3.82123e+07	0.859225
A0A1S4D0M5;A0A1S3Z7M9;A0A1S4A8S8;A0A1S4ANF9	chloroplast processing peptidase-like isoform X1	LOC107824580;LOC1077	23.5	5	32.474			84747000	69653000	60268000	71556000	70238000	73085000	74160000	7.24943e+07	0.987056
A0A1S3YUQ9	chloroplast stem-loop binding protein of 41 kDa a, chloroplastic-like	LOC107779757	69.4	26	43.536			11117000000	10576000000	10423000000	1.07053e+10	12312000000	12274000000	12119000000	12235000000	0.874976
A0A1S4B3Y9	chloroplast stem-loop binding protein of 41 kDa a, chloroplastic-like	LOC107804230	68.7	3	43.954			420640000	360970000	392730000	3.91447e+08	452280000	444070000	413620000	4.36657e+08	0.896463
A0A1S3Z334;A0A1S3YUW3	chloroplast stem-loop binding protein of 41 kDa b, chloroplastic; chloroplast stem-loop binding protein of 41 kDa b, chloroplastic-like	LOC107782473	74.6	25	41.702			14965000000	14753000000	14328000000	14682000000	15453000000	16158000000	16224000000	15945000000	0.92079
A0A1S3ZPC7	Chloroplastic heat shock protein 90	LOC107788863	53.3	18	90.788			711120000	688440000	751510000	7.17023e+08	663230000	691020000	662260000	672170000	1.06673
A0A1S3XBW7	chloroplastic lipocalin-like	LOC107763432	24.8	9	37.351			276350000	254410000	229620000	253460000	338120000	320760000	310530000	3.23137e+08	0.784374
A0A1S4B0R7	chloroplastic lipocalin-like	LOC107803353	24.8	1	37.257			13908000	0	15281000	9.72967e+06	31997000	0	29030000	2.03423e+07	0.478296
A0A1S4ASG9;A0A1S4B4Q6;A0A1S3Y8H7	Chorismate mutase	LOC107800931;LOC107804390	9.1	3	36.218			32749000	0	28050000	2.02663e+07	45980000	36346000	41320000	4.12153e+07	0.491718
A0A1S4B805;A0A1S3ZNK5	Chorismate mutase	LOC107805472;LOC107788688	3.4	1	29.883			0	0	0	0	0	6497000	7242800	4.57993e+06	0
A0A1S3ZTJ9;A0A1S3XXI4	Chorismate synthase	LOC107790266;LOC107769690	43.1	17	47.849			1782300000	1791500000	1665800000	1.74653e+09	1917300000	1787400000	1668300000	1791000000	0.975172
A0A1S3X0P9	cingulin-like protein 1	LOC107759985	0.9	1	104.14	+		44229000	55997000	43746000	4.79907e+07	0	64912000	56705000	40539000	1.18381
A0A1S4BHA3;A0A1S3ZJA2	cinnamoyl-CoA reductase 1-like	LOC107808266;LOC107787492	9.6	3	35.666			62053000	78059000	70717000	7.02763e+07	63403000	70579000	73508000	6.91633e+07	1.01609
A0A1S4B543	cinnamoyl-CoA reductase 1-like	LOC107804645	5.5	1	36.031			23103000	21113000	25690000	23302000	24960000	25890000	19681000	2.35103e+07	0.991139
A0A1S4BXH5;A0A1S3XI22;A0A1S3XHC6;A0A1S4BXI5	cinnamoyl-CoA reductase 2-like	LOC107812927;LOC107765221	25.2	6	35.851			213710000	225180000	231060000	2.23317e+08	221020000	237430000	217080000	2.25177e+08	0.99174
A0A1S4CZT8	cis-abienol synthase, chloroplastic-like	LOC107824406	16.2	13	91.83			252210000	307620000	274620000	278150000	196600000	265720000	260430000	2.40917e+08	1.15455
A0A1S4B8M9;A0A1S4DB00	cis-abienol synthase, chloroplastic-like isoform X1	LOC107805659	11.7	4	91.792			58184000	54407000	67171000	5.99207e+07	45170000	52538000	47366000	48358000	1.23911
A0A1S3ZYE5;A0A1S3YSJ7	Citrate synthase	LOC107791757;LOC107779254	24.5	10	52.488			370220000	337240000	335780000	3.47747e+08	403020000	401430000	347490000	383980000	0.905637
A0A1S3YTY4;W8SRJ8	citrate synthase, glyoxysomal-like; Citrate synthase	LOC107779717;LOC107822424	8.8	1	15.651			31532000	22127000	22516000	2.53917e+07	27609000	19078000	27399000	2.46953e+07	1.0282
A0A1S4D5H1;A0A1S3ZY26	Clathrin heavy chain	LOC107826230;LOC107791617	18.2	3	192.93			64511000	0	88062000	5.08577e+07	70014000	0	42690000	37568000	1.35375
A0A1S4C6G3;A0A1S4C4M9;A0A1S4ALF5	Clathrin heavy chain; clathrin heavy chain 1-like	LOC107815448;LOC107815033	23.5	30	192.5			939060000	876890000	893380000	903110000	692680000	729110000	802920000	741570000	1.21784
A0A1S4DK63;A0A1S4B3W2;A0A1S4BEG0;A0A1S4DNZ0	clathrin interactor EPSIN 1-like isoform X1; clathrin interactor EPSIN 1-like	LOC107830669;LOC107804273	8.7	3	64.224			61920000	54791000	95433000	7.07147e+07	59942000	69840000	57003000	6.22617e+07	1.13577
A0A1S4C5Q2	Clathrin light chain	LOC107815373	18.6	6	35.699			244850000	291440000	295670000	277320000	255400000	242930000	289610000	2.62647e+08	1.05587
A0A1S4AIX7;A0A1S3XZ38	clavaminate synthase-like protein At3g21360	LOC107797968;LOC107770380	6.2	1	36.109			14647000	0	16457000	10368000	9792600	12703000	0	7.49853e+06	1.38267
A0A1S3XYE2;A0A1S4A8W2;A0A1S3XAU6;A0A1S4B0K7;A0A1S3Z2Y8;A0A1S4CEG2	CLP protease regulatory subunit CLPX1, mitochondrial-like	LOC107769993	4.1	1	34.232			12083000	0	0	4.02767e+06	9524500	11719000	13569000	1.16042e+07	0.347088
A0A1S4AZL4;A0A1S4AK50	CLPTM1-like membrane protein cnrB	LOC107802894;LOC107798525	8.9	2	57.39			0	0	46709000	1.55697e+07	48620000	46537000	0	31719000	0.490862
A0A1S4BDV2;A0A1S4AAA4	clustered mitochondria protein-like; LOW QUALITY PROTEIN: clustered mitochondria protein-like	LOC107807246;LOC107795389	0.9	1	126.1			29767000	28117000	29339000	2.90743e+07	33179000	34945000	24440000	3.08547e+07	0.942299
O23792	CND41, chloroplast nucleoid DNA binding protein	cnd41	21.3	7	53.446			863650000	879150000	867170000	869990000	1063700000	958170000	916020000	9.79297e+08	0.888382
A0A1S4C9U6;A0A1S4D490;A0A1S3Y8P3	CO(2)-response secreted protease-like	LOC107816684;LOC107825780	7.7	4	81.049			63875000	54280000	65303000	6.11527e+07	82330000	74751000	94016000	83699000	0.730626
A0A1S3Z694;A0A1S4C9I9	CO(2)-response secreted protease-like	LOC107783456;LOC107816683	5.6	3	82.394			29576000	0	0	9.85867e+06	27640000	28058000	31747000	2.91483e+07	0.338224
A0A1S3Y478;A0A1S4AV72;A0A1S4BBT8	Coatomer subunit alpha; coatomer subunit alpha-1	LOC107771989;LOC107801629	18.3	17	137.15			1091700000	1130600000	1071300000	1.09787e+09	939140000	996810000	1047200000	9.94383e+08	1.10407
A0A1S3YFI6;A0A1S4CD69	Coatomer subunit alpha; coatomer subunit alpha-1-like	LOC107775546;LOC107817576	14.2	3	137.11			26652000	26568000	26491000	2.65703e+07	21782000	24080000	30112000	2.53247e+07	1.04919
A0A1S3Y2A5;A0A1S4CGU9	Coatomer subunit beta	LOC107771428;LOC107818821	13.2	9	103.95			232680000	248090000	236100000	2.38957e+08	207630000	197500000	221330000	208820000	1.14432
A0A1S4A0V0;A0A1S3YDE5	Coatomer subunit beta	LOC107792487;LOC107774878	10	8	109.49			208300000	181400000	164440000	1.84713e+08	154430000	183010000	188200000	1.75213e+08	1.05422
A0A1S3XLN6;A0A1S3X9A7	Coatomer subunit beta	LOC107766461	10.3	2	107.16			12123000	9915500	13056000	1.16982e+07	7728100	7363300	11124000	8.73847e+06	1.3387
A0A1S4DBY6;A0A1S4CDP5	coatomer subunit beta-1-like	LOC107828167;LOC107817724	24.1	4	35.92			64471000	59289000	72140000	65300000	35022000	51693000	57663000	48126000	1.35685
A0A1S3ZLM0;A0A1S3XK67	coatomer subunit beta-1-like; coatomer subunit beta-1	LOC107788062;LOC107766102	19.6	2	72.475			13939000	12388000	18432000	1.49197e+07	10124000	11800000	13966000	1.19633e+07	1.24712
A0A1S4CB27;A0A1S3WYQ5	Coatomer subunit delta	LOC107817076;LOC107759417	23.6	8	52.801			434930000	421880000	455480000	437430000	481390000	490780000	476370000	4.82847e+08	0.90594
A0A1S3XQA4;A0A1S3ZUQ1;A0A1S4C6J7	Coatomer subunit delta	LOC107767589;LOC107790687	17.9	3	58.056			47136000	56186000	42627000	4.86497e+07	64730000	51273000	45493000	53832000	0.903731
A0A1S3ZBQ8;A0A1S4B348	Coatomer subunit epsilon	LOC107785121;LOC107803985	27.8	5	31.971			114620000	96563000	101700000	1.04294e+08	71638000	92918000	82931000	8.24957e+07	1.26424
A0A1S4A371	Coatomer subunit gamma	LOC107793274	25.6	18	98.085			931230000	943980000	880170000	918460000	886200000	848450000	880010000	8.71553e+08	1.05382
A0A1S3X2D8;A0A1S3YIH5	Coatomer subunit gamma	LOC107760598;LOC107776662	25.6	2	98.059			83129000	103000000	119620000	1.01916e+08	108870000	97791000	101470000	1.0271e+08	0.99227
A0A1S4B4V0;A0A1S3ZW29;A0A1S4DC70;A0A1S4AHI1	Coatomer subunit zeta	LOC107804557;LOC107791054	26.5	3	20.168			43890000	48893000	50306000	4.76963e+07	40325000	37668000	43671000	4.05547e+07	1.1761
A0A1S4DF27	Coatomer subunit zeta	LOC107829140	13	1	19.382			10953000	18937000	9109600	1.29999e+07	10760000	11118000	6460000	9446000	1.37623
A0A1S4BHC0;A0A1S4CNK1;A0A1S3X3T0;A0A1S4BEN9;A0A1S4ASW9;A0A1S4BH34	COBRA-like protein	LOC107808222;LOC107820798	3	1	45.304			20233000	0	0	6.74433e+06	20860000	26765000	0	15875000	0.42484
A0A1S4CZJ7;A0A1S3YAN6	COBW domain-containing protein 1-like	LOC107824330;LOC107774293	29.2	11	50.533			253770000	229680000	286620000	256690000	207740000	268300000	237290000	2.37777e+08	1.07954
A0A1S3ZXT4;A0A1S3ZVA6;A0A1S3Y0A8;A0A1S4BVT5	coiled-coil domain-containing protein 124-like	LOC107791674;LOC10779085	5.2	1	26.725			17372000	12805000	15022000	1.50663e+07	14933000	14541000	15510000	1.49947e+07	1.00478
A0A1S3Z4F9;A0A1S3YVI2	coiled-coil domain-containing protein 18-like isoform X1; apolipoprotein A-I-like	LOC107782684;LOC107779987	14.6	5	51.176			119910000	111820000	100470000	1.10733e+08	102750000	107120000	115110000	1.08327e+08	1.02222
A0A1S4DJ59	Complex III subunit 9	LOC107830404	18.1	1	8.0662			13816000	16139000	21889000	1.72813e+07	0	18897000	12239000	1.03787e+07	1.66508
A0A1S3ZUH7;A0A1S4AL55	Condensin complex subunit 2	LOC107790636;LOC107798673	4.3	2	56.579			155470000	157890000	136850000	150070000	155700000	166450000	159550000	1.60567e+08	0.934627
A0A1S4DJ80;A0A1S4AMG8	Conserved oligomeric Golgi complex subunit 7	LOC107830423;LOC107799262	3.4	2	92.488			2540800	0	0	846933	3236500	1698500	3587600	2.84087e+06	0.298125
A0A075F1U0	Constitutive plastid-lipid associated protein	CHRD	57.8	10	19.871			941220000	1004800000	961670000	969230000	1084300000	1022000000	1123100000	1.07647e+09	0.900381
A0A1S4CVR6;A0A1S3ZU88	COP9 signalosome complex subunit 4-like	LOC107823129;LOC107790558	10.3	2	45.064			0	0	59298000	19766000	0	0	0	0	#DIV/0!
A0A1S3YBC0;A0A1S3X3U0	COP9 signalosome complex subunit 5b-like	LOC107774324;LOC107760891	10.6	4	40.889			44609000	45736000	35092000	4.18123e+07	45068000	33318000	48362000	4.22493e+07	0.989657
A0A1S3XUC9	copper transport protein ATX1-like	LOC107768675	61.6	1	9.1074			154110000	118440000	144450000	139000000	94800000	88293000	88417000	9.05033e+07	1.53586
A0A1S4CZF0	copper transport protein ATX1-like isoform X1	LOC107824312	61.6	4	9.1664			541560000	565610000	499120000	535430000	504450000	468060000	526380000	499630000	1.07165
A0A1S4AVS8;A0A1S3X3G9	copper transport protein ATX1-like isoform X1	LOC107801743;LOC107760780	45.3	4	12.371			341440000	345610000	310420000	332490000	398560000	385810000	338710000	374360000	0.888156
A0A1S4BU06;A0A1S3XCX6	copper-transporting ATPase PAA1, chloroplastic-like; copper-transporting ATPase PAA1, chloroplastic	LOC107811884;LOC107	6	2	56.552			18397000	11864000	15207000	15156000	14542000	17496000	15034000	1.56907e+07	0.965925
A0A1S3XMU0	Coproporphyrinogen oxidase	LOC107766888	49.1	6	44.798			524480000	515720000	425670000	4.88623e+08	568520000	588700000	526990000	5.61403e+08	0.870361
A0A1S4C5X4;Q42946	Coproporphyrinogen oxidase; Oxygen-dependent coproporphyrinogen-III oxidase, chloroplastic	LOC107815524;CPX	50.1	21	44.935			2545200000	2384100000	2380400000	2.43657e+09	2850300000	2797800000	2565700000	2.73793e+09	0.889929
A0A1S3Z2K0	costars family protein-like	LOC107782058	54.8	5	10.274			425230000	366350000	379700000	3.90427e+08	439840000	415470000	405250000	4.20187e+08	0.929174
A0A1S3XH45	costars family protein-like	LOC107765076	54.8	1	10.288			11697000	9092700	6940400	9.24337e+06	0	0	11018000	3.67267e+06	2.5168
A0A1S4DHQ9;A0A1S3YNA5;A0A1S3YN10	CRM-domain containing factor CFM2, chloroplastic-like	LOC107829943	1.6	2	117.81			23189000	28663000	32760000	28204000	21517000	16673000	22376000	2.01887e+07	1.39702
A0A1S4D2S7;A0A1S3Y073	cullin-4-like	LOC107825351;LOC107770797	1.5	1	93.822			0	8323700	0	2.77457e+06	0	0	15649000	5.21633e+06	0.5319
A0A1S4B3A6;A0A1S3YLI3	cullin-associated NEDD8-dissociated protein 1-like isoform X1; cullin-associated NEDD8-dissociated protein 1-like	LOC107804026	3.1	3	134.54			0	0	0	0	0	0	0	0	#DIV/0!
A0A1S4ATY4	Cyanate hydratase	LOC107801183	63	8	18.338			418780000	384250000	390730000	397920000	641660000	520040000	462210000	5.41303e+08	0.735115
A0A1S4CQN8	Cyanate hydratase	LOC107821369	54.4	1	17.743			0	0	0	0	0	0	37984000	1.26613e+07	0
Q6RKB4;A0A1S3Z3X1;A0A1S4BT32;A0A1S4CD32;A0A1S4BWU4;A0A1S3YD45	Cyclase	LOC107788173	18.2	8	69.721			255850000	259280000	267210000	260780000	164550000	179060000	201100000	181570000	1.43625
A0A1S4AVZ0	cyclase-associated protein 1-like	LOC107801880	16.5	5	50.885			123140000	114060000	132470000	1.23223e+08	129220000	129120000	126840000	1.28393e+08	0.959733
A0A1S4A367;A0A1S3X2D3	cyclase-associated protein 1-like	LOC107793271;LOC107760595	15.8	4	50.778			72357000	80332000	70582000	7.44237e+07	101150000	84827000	82184000	89387000	0.832601
A0A1S3XHG5	cyclase-associated protein 1-like	LOC107765227	13.5	1	51.06			32077000	0	0	1.06923e+07	35215000	0	0	1.17383e+07	0.91089
A0A1S4BIY5;A0A1S4D8P3;A0A1S3Y9S0	cyclic phosphodiesterase-like	LOC107808778;LOC107827209	9.7	1	21.973			22657000	19235000	25498000	2.24633e+07	15178000	18932000	20103000	18071000	1.24306
Q9FUR4;Q40484;A0A1S4CF81;A0A1S3YDH4	Cyclin-dependent kinase A:4 (Fragment); Cdc2 homolog	CdkA:4;LOC107785170	4.8	1	33.916			9415700	12291000	11756000	1.11542e+07	6371600	10639000	10149000	9053200	1.23208
A0A1S4C927;A0A1S4CGS0	cyclin-P3-1-like; cyclin-P3-1-like isoform X1	LOC107816272;LOC107818644	3.5	1	25.414			0	0	0	0	0	0	70980000	23660000	0
A0A1S4CEX5;A0A1S3XB52	cyprosin-like	LOC107818093;LOC107763186	14.6	5	55.248			218370000	215620000	161230000	1.98407e+08	198800000	225060000	220400000	2.14753e+08	0.923882
A0A1S4DRL6	cyprosin-like	LOC107832722	22	5	55.17			31098000	35983000	64342000	4.38077e+07	33442000	30343000	33762000	3.25157e+07	1.34728
A0A1S4DEU5;A0A1S4BJV8	cyprosin-like; aspartic proteinase A1-like	LOC107828978;LOC107809122	20.9	10	54.751			442950000	345560000	401940000	3.96817e+08	457610000	440410000	377060000	4.25027e+08	0.933628
A0A1S3Z968;A0A1S3YZB0;A0A1S3ZFV8;A0A1S3X2T7	cystathionine beta-lyase, chloroplastic-like; cystathionine beta-lyase, chloroplastic-like isoform X1	LOC107784322;LOC1	25.6	9	51.434			253100000	224520000	209440000	229020000	250660000	228850000	229530000	2.36347e+08	0.969
A0A1S4CU66	cystathionine gamma-synthase 1, chloroplastic-like	LOC107822634	20.7	8	58.162			232730000	218710000	219340000	2.23593e+08	254680000	232810000	238270000	241920000	0.924245
A0A1S3Y2Y7;A0A1S4C1W4	cystathionine gamma-synthase 1, chloroplastic-like	LOC107771605;LOC	10.4	3	48.885			77663000	88135000	89831000	8.52097e+07	84830000	83307000	107920000	92019000	0.926001
A0A1S4B3D9;A0A1S3XA26	Cysteine desulfurase	LOC107804015;LOC107762876	23.7	8	50.409			264230000	215620000	246060000	241970000	258100000	245390000	226200000	243230000	0.99482
A0A1S3ZTF8	Cysteine desulfurase	LOC107790197	11.8	5	51.967			165710000	194890000	150390000	170330000	172930000	145800000	174650000	164460000	1.03569
A0A1S4A2J0	Cysteine desulfurase	LOC107793129	8.6	1	51.925			23684000	0	27711000	1.71317e+07	19530000	19614000	31805000	2.36497e+07	0.724394
C3RSF4;Q9LRI2	Cysteine protease	LOC107823208;NTCP-23	20.6	5	39.184			418410000	401280000	416590000	4.12093e+08	576170000	514130000	487810000	5.26037e+08	0.783393
Q5EH89;B2CDE1	Cysteine protease	CP2;LOC107771814	5	1	40.563			0	0	0	0	0	7660800	13395000	7018600	0
T2BRU8;A0A1S4AAW5	Cysteine protease CP6; low-temperature-induced cysteine proteinase-like	CP6;LOC107795650	18	6	51.254			322820000	282010000	246220000	2.83683e+08	358160000	344150000	339060000	3.47123e+08	0.817241
A0A1S4C9C5	cysteine protease inhibitor 8-like	LOC107816366	6.1	1	26.84			0	0	0	0	8908600	0	0	2.96953e+06	0
A0A075F9G5;A0A1S4CXY3	Cysteine protease inhibitor; cysteine proteinase inhibitor 1-like	CYS2;LOC107823829	30.8	3	13.128			69024000	66689000	63610000	66441000	80920000	67743000	85136000	77933000	0.85254
A0A1S4CEE8;A0A1S3YER8	cysteine proteinase 3-like	LOC107818105;LOC107775429	15.8	4	39.821			108330000	97144000	86042000	97172000	154000000	140220000	136180000	1.43467e+08	0.677314
A0A075F933	Cysteine proteinase inhibitor	CYS3	45.4	8	28.098			597570000	490740000	674160000	587490000	646960000	686460000	650280000	6.61233e+08	0.888476
A0A1S4CU07;A0A059TCI1;A0A059TCI3	Cysteine proteinase inhibitor	LOC107822566;LOC107761445	53.1	4	10.835			320190000	396390000	338810000	3.51797e+08	427920000	440590000	406470000	4.24993e+08	0.82777
A0A1S4BYK5	Cysteine proteinase inhibitor	LOC107813255	34.1	1	27.827	+		0	0	41224000	1.37413e+07	0	0	0	0	#DIV/0!
A0A1S4CCJ9	Cysteine synthase	LOC107817517	63.6	19	41.174			11116000000	10313000000	11637000000	11022000000	13363000000	12269000000	12193000000	1.26083e+10	0.874184
A0A1S3YM56;A0A1S4AUF2;A0A1S4D1J3	Cysteine synthase	LOC107777625;LOC107801535	44.9	11	34.238			1025100000	979470000	930600000	978390000	1069200000	1025300000	1072600000	1055700000	0.926769
W8R6T6	Cysteine synthase	LOC107793898	63.6	2	41.178			378280000	406930000	412370000	3.99193e+08	421080000	462650000	443100000	4.42277e+08	0.902587
A0A1S3ZNU1	Cysteine synthase	LOC107788814	21	8	39.781			277670000	315790000	285250000	2.92903e+08	253360000	311350000	317880000	2.94197e+08	0.995604
A0A1S3ZI39	Cysteine synthase	LOC107787097	25.1	2	39.41			59326000	79304000	67746000	68792000	61605000	66043000	63221000	63623000	1.08124
A0A1S4ABJ7;A0A1S4A3V2	Cysteine synthase	LOC107795843;LOC107793495	12.1	2	40.765			35336000	51820000	51052000	4.60693e+07	48868000	43843000	54808000	49173000	0.936883
A0A1S3X0N4;A0A1S4D1C1	Cysteine synthase	LOC107759972;LOC107824828	11.5	2	34.503			0	0	0	0	0	0	9873400	3.29113e+06	0
Q08196;A0A1S3YGS8;Q08194	Cysteine-rich extensin-like protein-3; keratinocyte proline-rich protein-like	LOC107787895;LOC107776111	12.1	2	18.247			466190000	493760000	483110000	481020000	488860000	497720000	480830000	4.89137e+08	0.983406
A0A1S4CHT0;A0A1S4ADS4;A0A1S3XQD7;A0A1S3XN88;A0A1S3YXL2;A0A1S4AGZ5	cysteine--tRNA ligase, chloroplastic/mitochondrial-like	LOC107818984	12.3	4	35.736			41030000	33055000	36088000	3.67243e+07	28036000	27408000	32136000	2.91933e+07	1.25797
Q95871;A0A1S4C7L2	Cytochrome b	Ntabcob;LOC107815813	5.6	2	44.016			31540000	35724000	32003000	33089000	25980000	25961000	38649000	3.01967e+07	1.09578
P49098;A0A1S3YYM5;A0A1S4CDV5	Cytochrome b5; cytochrome b5	LOC107781159	55.9	5	14.979			209550000	190070000	181770000	1.93797e+08	242200000	219220000	198500000	2.19973e+08	0.881001
A0A140G1T3;A0A1S4AKA1	Cytochrome b559 subunit alpha	psbE	33.7	3	9.3965			849900000	915360000	878290000	8.81183e+08	733130000	903790000	888990000	841970000	1.04657
A0A140G1T2	Cytochrome b559 subunit beta	psbF	20.5	1	4.4843			374890000	470320000	467150000	4.37453e+08	343980000	454030000	385460000	394490000	1.10891
A0A1S4ACF7;A0A1S3Y1L6	cytochrome b561 and DOMON domain-containing protein At3g25290-like	LOC107796023	21.9	4	25.62			440530000	422430000	401220000	4.21393e+08	489620000	470120000	391460000	450400000	0.935598
A0A1S4CW19	cytochrome b5-like	LOC107823219	56	5	15.029			265660000	208080000	228110000	233950000	318530000	309640000	281580000	303250000	0.771476
A0A1S3XYU8	cytochrome b5-like	LOC107770339	47.8	1	15.068			43417000	42225000	36972000	4.08713e+07	44086000	62748000	54235000	5.36897e+07	0.761251
A0A1S4BFP2	cytochrome b5-like	LOC107807722	27.8	2	14.851			27193000	24711000	26658000	2.61873e+07	30232000	25457000	33238000	2.96423e+07	0.883444
A0A1S3X5K0	cytochrome b5-like	LOC107761444	11.5	1	14.487			0	0	0	0	8709000	0	0	2903000	0
A0A1S3XUT0	cytochrome b5-like	LOC107768957	27.8	1	14.791			0	12041000	0	4.01367e+06	27810000	0	19591000	1.58003e+07	0.254024
A0A1S3XVT6;A0A140G1U6	cytochrome b6	LOC107769160	30.1	8	32.95			11504000000	11247000000	10749000000	1.11667e+10	13747000000	13506000000	13646000000	13633000000	0.819091
A0A140G1U7	Cytochrome b6	petB	29.8	1	24.136			227340000	222700000	228720000	2.26253e+08	381080000	268700000	260960000	303580000	0.745284
P30361;A0A1S3XHZ1	Cytochrome b6-f complex iron-sulfur subunit 1, chloroplastic; Plastoquinol--plastocyanin reductase	petC1;LOC107765416	67.1	2	24.152			25721000	38704000	29860000	3.14283e+07	35359000	32779000	74109000	4.74157e+07	0.662826
Q02585;A0A1S4B832	Cytochrome b6-f complex iron-sulfur subunit 2, chloroplastic; Plastoquinol--plastocyanin reductase	petC2;LOC107805497	67.1	9	24.108			9089900000	8833300000	8256200000	8.72647e+09	11276000000	10817000000	10794000000	1.09623e+10	0.796041
A0A140G1U8	Cytochrome b6-f complex subunit 4	petD	6.2	1	17.459			555940000	607240000	547910000	5.70363e+08	602780000	792450000	594050000	6.63093e+08	0.860155
A0A1S3XU58;A0A1S3X016	Cytochrome b-c1 complex subunit 6	LOC107768841	49.3	4	8.1312			219970000	193150000	199300000	204140000	319120000	263850000	296690000	293220000	0.696201
A0A1S4BAA7	Cytochrome b-c1 complex subunit 6	LOC107806233	46.4	2	8.0271			41249000	41469000	30706000	37808000	57964000	52006000	45695000	5.18883e+07	0.728642
A0A1S4BGM4;A0A1S4C800	Cytochrome b-c1 complex subunit 7	LOC107808039	30.9	3	14.48			62138000	52561000	73349000	6.26827e+07	55708000	59064000	39766000	5.15127e+07	1.21684
A0A1S4A0B3;A0A1S3YPN0;A0A1S3XKC1;A0A1S3Z3H7	cytochrome b-c1 complex subunit 8-like	LOC107792330;LOC107778283	16.7	1	8.3878			31685000	27424000	23824000	2.76443e+07	18778000	21800000	20447000	2.03417e+07	1.359
A0A1S4BCD1;A0A1S3YZK4;A0A1S3YI67;A0A1S4C912	cytochrome c oxidase subunit 5b-2, mitochondrial-like; putative cytochrome c oxidase subunit 5b-like	LOC107806763;LOC10	11.8	1	13.898			70718000	0	0	2.35727e+07	87439000	0	101860000	6.30997e+07	0.373578
A0A1S4D6C0	cytochrome c oxidase subunit 6b-1-like	LOC107826501	34.6	2	19.935			34621000	40395000	27901000	3.43057e+07	55680000	43755000	44631000	48022000	0.714374
A0A1S4DCE5	cytochrome c oxidase subunit 6b-1-like	LOC107828337	26	1	20.948			0	0	0	0	48530000	44887000	67829000	5.37487e+07	0
A0A1S4ABI0	cytochrome c oxidase subunit 6b-1-like	LOC107795736	26	1	21.015			0	0	0	0	19689000	14444000	12331000	15488000	0
A0A1S4A9F1	cytochrome c oxidase subunit 6b-1-like isoform X1	LOC107795202	46.5	7	20.331			102120000	96558000	94660000	9.77793e+07	167440000	130550000	173380000	1.57123e+08	0.622309
A0A1S4C7X6;A0A1S4CDI0;A0A1S4BHB3;A0A1S3YMB4	cytochrome c; cytochrome c-like	LOC107816090;LOC107817803	41.1	2	12.183			47437000	46606000	39097000	44380000	73055000	64885000	62086000	6.66753e+07	0.665613
A0A1S3YU22;A0A1S4CNC5;A0A1S3X0W4;A0A1S4C1W9	cytochrome c1-1, heme protein, mitochondrial; cytochrome c1-2, heme protein, mitochondrial-like	LOC107779532;LOC1078206	21.6	4	35.074			85616000	93765000	115060000	98147000	80052000	84798000	96507000	87119000	1.12659
A0A1S3XYH7;A0A1S4DHR8	cytochrome c1-2, heme protein, mitochondrial; cytochrome c1-2, heme protein, mitochondrial-like	LOC107770145;LOC1078298	18.1	1	33.888			20412000	16831000	19408000	1.88837e+07	0	22840000	15722000	12854000	1.46909
A0A1S4CNA9;A0A1S3ZQ07;A0A1S3YDA5	cytochrome c-like; cytochrome c	LOC107820918;LOC107789084	52.7	5	12.074			392620000	428370000	424590000	4.15193e+08	521330000	518090000	556060000	5.31827e+08	0.780693
A0A140G1S8	Cytochrome f	petA	52.8	18	35.245			12159000000	12887000000	13209000000	1.27517e+10	15622000000	14372000000	15411000000	15135000000	0.842528
A0A1S4BPZ2;A0A1S4B5M8	cytochrome P450 97B2, chloroplastic-like isoform X1	LOC107810668;L	13	6	64.819			62448000	70382000	57528000	6.34527e+07	45144000	54600000	58514000	5.27527e+07	1.20283
A0A1S3XRR9;A0A1S4CZ99	cytochrome P450 98A2-like	LOC107767804;LOC107824233	4.7	2	57.949			10531000	10568000	11552000	1.08837e+07	0	0	15391000	5.13033e+06	2.12143
A0A1S4AKY4	cytochrome P450 CYP72A219-like	LOC107798787	2.5	1	59.858			0	0	0	0	0	0	0	0	#DIV/0!
A0A1S4AJF2;A0A1S4AJK4;A0A1S4BCI3;A0A1S4CTL5	cytochrome P450 CYP736A12-like	LOC107798372;LOC107798373	8.2	4	57.03			0	0	0	0	0	0	15575000	5.19167e+06	0
A0A1S3Z855;A0A1S4DF93	Cytokinin riboside 5-monophosphate phosphoribohydrolase	LOC107784101	15.5	2	23.274			33156000	41798000	36273000	3.70757e+07	44107000	45861000	40516000	4.34947e+07	0.852419
Q40589;Q42941;A0A1S3Z5I5	Cytosolic ascorbate peroxidase; Ascorbate peroxidase	LOC107759703;APX	63.2	6	27.45			1267500000	942170000	1195100000	1.13492e+09	1308300000	1264400000	1238300000	1.27033e+09	0.893406
A0A1S4CTV2	D synthase-like	LOC107822502	1.5	1	70.817	+		164320000	109270000	0	9.11967e+07	131610000	102460000	21035000	85035000	1.07246
A0A1S3Y159	D-3-phosphoglycerate dehydrogenase	LOC107771022	30.9	14	67.078			1087900000	1050000000	1178600000	1105500000	653190000	844410000	915770000	8.04457e+08	1.37422
A0A1S4A5W5;A0A1S3ZL41;A0A1S4DRB5;A0A1S3ZBJ0	D-3-phosphoglycerate dehydrogenase	LOC107794066;LOC107787868	22.1	8	62.958			503800000	621750000	569220000	5.64923e+08	460660000	409080000	503430000	4.57723e+08	1.2342
A0A1S4BI71	D-3-phosphoglycerate dehydrogenase	LOC107808555	28.9	2	67.115			0	0	37757000	1.25857e+07	0	0	28873000	9.62433e+06	1.30769
A0A1S4CF99	DAG protein, chloroplastic-like	LOC107818361	27.4	5	25.405			771230000	646070000	644570000	687290000	720310000	616570000	667260000	6.68047e+08	1.02881
A0A1S3YCF3	DAG protein, chloroplastic-like	LOC107774603	27.3	1	25.545	+		99724000	102290000	100390000	1.00801e+08	109400000	118180000	113870000	1.13817e+08	0.885647
A0A1S4CYA4;A0A1S4BFL4	DDT domain-containing protein DDB_G0282237-like	LOC107823788;LOC107807	2.4	1	73.844			83302000	87206000	79951000	8.34863e+07	80809000	58756000	62688000	6.74177e+07	1.23835
A0A1S4C1B1	DEAD-box ATP-dependent RNA helicase 38-like	LOC107814119	19.6	7	50.464			143910000	161510000	159400000	154940000	148450000	141040000	160780000	150090000	1.03231
A0A1S4D4A7;A0A1S3Z2W4;A0A1S3Y4S7	DEAD-box ATP-dependent RNA helicase 38-like	LOC107825795;LOC107782346	19.7	1	55.207			0	0	0	0	0	0	0	0	#DIV/0!
A0A1S4C023;A0A1S4APK5;A0A1S3YCS7;A0A1S3Y0E6;A0A1S3XQ54;A0A1S3X077	DEAD-box ATP-dependent RNA helicase 56-like isoform X1; DEAD-box ATP-dependent RNA helicase 56-like	LOC107813637;LOC107	10	4	48.428			132100000	182350000	141220000	151890000	109360000	127880000	159590000	1.32277e+08	1.14828
A0A1S3X8T3;A0A1S4AI39;A0A1S3ZZF5;A0A1S4BN88	DEAD-box ATP-dependent RNA helicase 8-like	LOC107762362;LOC107797871	10.3	4	57.472			33868000	43702000	38909000	3.88263e+07	28870000	27960000	32261000	29697000	1.30742
A0A1S4BPM7;A0A1S3YG04	defensin-like protein P322	LOC107810540;LOC107775919	33.3	3	8.7323			361920000	407860000	383480000	384420000	389020000	403640000	446820000	413160000	0.930439
A0A1S3XWM6;A0A1S3XF24	dehydrogenase, mitochondrial-like	LOC107769567	10.3	2	27.804			24531000	25294000	40261000	3.00287e+07	30117000	17255000	24346000	23906000	1.25611
A0A1S3Z7G4	dehydrogenase-like	LOC107783838	7	2	33.088			21649000	14332000	0	1.19937e+07	0	20969000	0	6.98967e+06	1.71591
A0A1S3ZTG9;A0A1S3ZE57;A0A1S3YJC3;A0A1S4AC88	delta(24)-sterol reductase-like; delta(24)-sterol reductase isoform X1	LOC107790238;LOC107785877	20.8	10	66.109			492000000	528590000	533230000	517940000	419110000	480430000	439260000	4.46267e+08	1.16061
A0A1S3ZGF8;A0A1S3YT57	delta-1-pyrroline-5-carboxylate dehydrogenase 12A1, mitochondrial-like	LOC107786410	18.9	8	60.915			250880000	264500000	246080000	253820000	297840000	247570000	269080000	2.71497e+08	0.934892
A0A1S4AGF4;A0A1S3Y7A1	Delta-1-pyrroline-5-carboxylate synthase	LOC107797411;LOC107773204	19.4	11	77.586			337890000	329070000	358270000	3.41743e+08	275500000	351510000	282500000	303170000	1.12723
A0A1S4CJ18;A0A1S3YJL2	Delta-1-pyrroline-5-carboxylate synthase	LOC107819560;LOC107776743	6.8	2	77.952			25068000	44598000	27814000	3.24933e+07	26964000	28521000	28101000	27862000	1.16622
A0A1S4A3B3;A0A1S4AKW2	Delta-aminolevulinic acid dehydratase	LOC107793287;LOC107798564	42.5	13	46.365			1949900000	1988400000	2001500000	1.97993e+09	2048300000	1968900000	1914200000	1.97713e+09	1.00142
A0A1S3X9Z8;A0A1S4B303	dentin sialophosphoprotein-like	LOC107762875;LOC107804014	5	2	77.752			13280000	9177500	10328000	10928500	0	11921000	11560000	7827000	1.39626
A0A1S4D013;A0A1S3YE52	Deoxyuridine 5-triphosphate nucleotidohydrolase	LOC107824504;LOC1077	36	4	18.202			99809000	115100000	83971000	9.96267e+07	71183000	82827000	93586000	82532000	1.20713
A0A1S3X0I2;A0A1S4D1I3	Deoxyuridine 5-triphosphate nucleotidohydrolase	LOC107759974;LOC1078	18.4	1	15.427			0	0	0	0	0	0	19616000	6.53867e+06	0
A0A1S4CDV2;A0A1S4CXQ9	desiccation protectant protein Lea14 homolog	LOC107818007	18.9	3	18.638			481460000	370750000	382310000	4.11507e+08	450280000	298210000	303390000	3.50627e+08	1.17363
A0A1S4CSE2;A0A1S3WYK0;A0A1S3ZTZ3	desumoylating isopeptidase 1-like	LOC107822016;LOC107759334	7.9	2	28.853			0	0	0	0	0	0	12671000	4.22367e+06	0
A0A1S4CN02	DExH-box ATP-dependent RNA helicase DExH10-like isoform X1	LOC107820795	3.4	1	22.973	+		0	0	0	0	0	0	0	0	#DIV/0!
A0A1S3XCJ5	D-glycerate 3-kinase, chloroplastic-like	LOC107763687	50.7	16	50.903			1026600000	902900000	972180000	9.67227e+08	955890000	985340000	1031200000	990810000	0.976198
A0A1S4C4J1	D-glycerate 3-kinase, chloroplastic-like	LOC107815070	38.8	1	51.038			128310000	68149000	129030000	1.08496e+08	82319000	96731000	111580000	9.68767e+07	1.11994
A0A1S4A6G7	diaminopimelate decarboxylase 1, chloroplastic-like	LOC107794250	30	11	52.603			735230000	803920000	756770000	7.65307e+08	672000000	724350000	666950000	6.87767e+08	1.11274
A0A1S4A1U3	diaminopimelate decarboxylase 1, chloroplastic-like	LOC107792812	29.6	2	52.934			57509000	57704000	59020000	5.80777e+07	58097000	59106000	59278000	58827000	0.987262
A0A1S4B8W2;A0A1S4AEJ3;A0A1S3Y5U8;A0A1S3YUT1	Diaminopimelate epimerase	LOC107805769;LOC107796792	18	5	39.76			104560000	94638000	109960000	1.03053e+08	115230000	128320000	82224000	1.08591e+08	0.948995
A0A1S3ZBX4;A0A1S3YAP0	dicarboxylate transporter 1, chloroplastic-like	LOC107785134;LOC107774	3.2	2	59.607			613230000	681970000	652710000	6.49303e+08	463000000	688160000	564630000	571930000	1.13528
A0A1S4CIG3;A0A1S3ZMH7;A0A1S3ZM73	dihydrofolate reductase-like isoform X1	LOC107819360	16.5	3	25.941			34478000	22240000	19097000	2.52717e+07	41910000	23423000	39014000	3.47823e+07	0.726566
A0A1S3XFZ4	Dihydrolipoamide acetyltransferase component of pyruvate dehydrogenase complex	LOC107764742	34.2	12	48.738			529950000	535050000	593140000	5.52713e+08	453760000	477530000	455890000	4.62393e+08	1.19533
A0A1S4AGV0;A0A1S4CC28	Dihydrolipoamide acetyltransferase component of pyruvate dehydrogenase complex	LOC107797489	11.8	3	49.725			127520000	127760000	98110000	1.17797e+08	94282000	107970000	102830000	101694000	1.15834
A0A1S4AXH8	Dihydrolipoamide acetyltransferase component of pyruvate dehydrogenase complex	LOC107802375	29	2	47.988			84582000	46448000	108380000	7.98033e+07	126250000	130050000	83063000	113121000	0.705469
A0A1S4CAZ6;A0A1S4C175	Dihydrolipoamide acetyltransferase component of pyruvate dehydrogenase complex	LOC107817052	4.7	2	68.946			28833000	33602000	39708000	3.40477e+07	29692000	26771000	39476000	3.19797e+07	1.06467
A0A1S4CP19;A0A1S3Z5Q1	Dihydrolipoamide acetyltransferase component of pyruvate dehydrogenase complex	LOC107820956	6.7	3	55.328			27114000	24396000	31937000	2.78157e+07	29536000	26574000	26095000	2.74017e+07	1.01511
A0A1S4BLB5	Dihydrolipoamide acetyltransferase component of pyruvate dehydrogenase complex	LOC107809523	33.8	2	48.543			17953000	18852000	26185000	2.09967e+07	21494000	17952000	20552000	1.99993e+07	1.04987
A0A1S4CPN2	Dihydrolipoyl dehydrogenase	LOC107821052	75.4	36	53.386			8199300000	7579600000	7926100000	7.90167e+09	9852100000	9094000000	9218200000	9388100000	0.841668
A0A1S4C004	Dihydrolipoyl dehydrogenase	LOC107813704	29.4	3	53.44			615360000	569410000	607130000	597300000	773300000	723080000	738010000	7.44797e+08	0.801964
A0A1S4B0A8	Dihydrolipoyl dehydrogenase	LOC107803150	75	3	53.445			311730000	251290000	227360000	263460000	278750000	236360000	263120000	259410000	1.01561
A0A1S4C8W4;A0A1S3Z750;A0A1S4CX44	dihydrolipoyl dehydrogenase 2, chloroplastic-like isoform X1	LOC107816379	13.8	2	59.702			73659000	81217000	86410000	8.04287e+07	81521000	76528000	67406000	7.51517e+07	1.07022
A0A1S4AZJ1;A0A1S3Z2N3	dihydrolipoyl dehydrogenase 2, chloroplastic-like; Dihydrolipoyl dehydrogenase	LOC107802918;LOC107782283	21.2	9	61.465			284720000	274920000	288480000	2.82707e+08	313890000	289220000	292740000	2.98617e+08	0.946721
A0A1S4DBD5;A0A1S4AS81	Dihydrolipoyllysine-residue succinyltransferase	LOC107828007;LOC107800	14.7	7	51.212			522590000	479300000	550430000	517440000	422830000	490800000	501310000	4.71647e+08	1.09709
A0A1S4CKP8	Dihydrolipoyllysine-residue succinyltransferase	LOC107819849	8.8	2	51.108			0	30035000	24071000	1.80353e+07	0	0	0	0	#DIV/0!
A0A1S4BMA9;A0A1S4BM72	Dihydropyrimidine dehydrogenase (NADP(+))	LOC107809801;LOC107809767	16.4	7	47.338			66679000	71130000	89437000	7.57487e+07	55357000	95073000	97090000	8.25067e+07	0.918091
A0A1S3ZK66;A0A1S3Z1R6	Dihydroxy-acid dehydratase	LOC107787836;LOC107782074	29	15	65.738			1139700000	1205600000	1291000000	1212100000	1249900000	1149000000	1206300000	1.20173e+09	1.00863
A0A1S3XJZ9;A0A1S4D6B9	dipeptidyl-peptidase 5-like; uncharacterized protein LOC107826425 isoform X1	LOC107766093;LOC107826425	8.3	4	80.846			55721000	52186000	30172000	4.60263e+07	56527000	52029000	52778000	53778000	0.855858
A0A1S3WZY8;A0A1S3XBX7;A0A1S4BTP3;A0A1S4CBJ6	Diphosphomevalonate decarboxylase	LOC107759723;LOC107763449	12.5	4	45.978			27223000	37952000	32924000	3.26997e+07	46743000	27662000	48314000	4.09063e+07	0.799379
A0A1S4A7D3;A0A1S3YDN4	Divinyl chlorophyllide a 8-vinyl-reductase, chloroplastic	LOC107794507	19.7	7	45.616			425210000	469050000	435290000	4.43183e+08	385090000	457710000	386930000	409910000	1.08117
A0A1S4AI27	DNA damage-binding protein 1	LOC107797933	3.5	3	121.8			35856000	31527000	35818000	3.44003e+07	23264000	41085000	34634000	3.29943e+07	1.04261
A0A1S3ZN92	DNA damage-inducible protein 1	LOC107788650	22.7	8	44.899			235010000	229400000	231010000	2.31807e+08	295950000	302690000	255680000	2.84773e+08	0.814004
A0A1S3ZF51	DNA gyrase subunit B	LOC107786139	2.6	2	81.591			0	0	6487500	2162500	0	5778300	9328500	5035600	0.429442
A0A1S4D1A9;A0A1S4C2F4	DNA topoisomerase	LOC107824884;LOC107814336	1.3	1	112.62			0	0	0	0	0	0	0	0	#DIV/0!
A0A1S4B9S6;A0A1S4DFF3	DNA-binding protein DDB_G0278111-like isoform X1	LOC107805947;LOC1078	14.1	1	14.818			15982000	17691000	17037000	1.69033e+07	22882000	19004000	21219000	21035000	0.803581
A0A1S3XRW7;A0A1S4AGG0	DNA-binding protein DDB_G0278111-like isoform X1; DNA-binding protein DDB_G0278111-like	LOC107768029;LOC107797368	14.1	2	14.705			73831000	63617000	72322000	6.99233e+07	84506000	76454000	75483000	7.88143e+07	0.887191
A0A1S4AC55;A0A1S4B5I7	DNA-binding protein SMUBP-2-like	LOC107795928;LOC107804694	6.5	4	107.79			21712000	41835000	51160000	3.82357e+07	21242000	26283000	36743000	2.80893e+07	1.36122
A0A1S3YWV9;A0A1S3ZQ83;A0A1S3XTM2	DNA-damage-repair/toleration protein DRT100-like	LOC107780748;LOC1077	22.7	7	40.062			103800000	120080000	106830000	1.10237e+08	108130000	95408000	109600000	1.04379e+08	1.05612
A0A1S4BUQ3;A0A1S4B1M3	DNA-damage-repair/toleration protein DRT100-like	LOC107812102;LOC1078	3.8	1	39.127			15800000	0	18813000	1.15377e+07	11810000	10053000	17957000	1.32733e+07	0.869237
A0A1S4DL22;A0A1S3Y4Z8	DNA-damage-repair/toleration protein DRT102-like	LOC107830916;LOC1077	23.1	5	33.917			69678000	69799000	72335000	70604000	99517000	98306000	66023000	8.79487e+07	0.802786
A0A140G1Q2	DNA-directed RNA polymerase	rpoC2	0.9	1	156.84			0	0	0	0	0	0	0	0	#DIV/0!
A0A140G1U9	DNA-directed RNA polymerase subunit alpha	rpoA	3.9	1	38.612			20291000	35598000	21445000	25778000	13643000	0	10561000	8068000	3.19509
A0A1S4DQA5;A0A1S3ZRY0	DNA-directed RNA polymerases II, IV and V subunit 3-like	LOC107832026	8.5	1	35.636			0	0	0	0	0	0	0	0	#DIV/0!
A0A1S4B218;A0A1S4CBU0	dnaJ homolog subfamily C member 2-like	LOC107803599;LOC107817162	7.4	3	73.698			29268000	0	0	9756000	29558000	20576000	0	1.67113e+07	0.583795
A0A1S4DGT5;A0A1S4D2X1;A0A1S4DG27;A0A1S4AWC3;A0A1S4A3V9;A0A1S4BAX0;A0A1S3XCQ1;A0A1S4BXN8;A0A1S4CZ65	dnaJ protein homolog	LOC107829640;LOC107825388	14.5	4	46.602			141830000	133860000	121960000	132550000	103240000	134340000	119090000	118890000	1.1149
A0A1S3YPI4;A0A1S3XZX6	dnaJ protein P58IPK homolog	LOC107778306;LOC107770481	2.7	1	53.944			0	0	0	0	0	0	0	0	#DIV/0!
A0A1S4B9I6	Dolichyl-diphosphooligosaccharide--protein glycosyltransferase 48 kDa subunit	LOC107805875	8.2	3	48.663			11564000	18775000	18261000	16200000	0	0	0	0	#DIV/0!
A0A1S3ZN54	Dolichyl-diphosphooligosaccharide--protein glycosyltransferase 48 kDa subunit	LOC107788534	7.8	1	48.652			0	0	0	0	0	0	0	0	#DIV/0!
A0A1S4CU23;A0A1S4CHI6	Dolichyl-diphosphooligosaccharide--protein glycosyltransferase 48 kDa subunit	LOC107822577	5.1	1	48.419			0	9884700	10330000	6.73823e+06	4096400	6438500	0	3.51163e+06	1.91883
A0A1S4CNM0;A0A1S4A9T8;A0A1S4CEN4	Dolichyl-diphosphooligosaccharide--protein glycosyltransferase subunit 1	LOC107820823	8.3	3	69.116			35682000	28724000	30644000	3.16833e+07	31484000	27120000	0	1.95347e+07	1.6219
A0A1S4AWG0;A0A1S4D8Q2;A0A1S4CHX5;A0A1S3YB79	Dolichyl-diphosphooligosaccharide--protein glycosyltransferase subunit 2	LOC107802106	19.5	9	74.759			134900000	128550000	157220000	1.40223e+08	80383000	107680000	96465000	9.48427e+07	1.47848
A0A1S3ZDM8;A0A1S3Y6L1	Dynamin GTPase	LOC107785713;LOC107772803	2.7	2	99.129			0	8252800	4948400	4400400	0	5965100	0	1.98837e+06	2.21307
A0A1S4BTR8;A0A1S4B2H8;A0A1S3YN26;A0A1S3Y7S9;A0A1S3YUT9;A0A1S3YK24;A0A1S3YNY9	dynamin-related protein 1E-like	LOC107811739;LOC107803775	4.7	3	68.824			12526000	28829000	18829000	2.00613e+07	10684000	12941000	0	7875000	2.54747
A0A1S4DC41;A0A1S4A374;A0A1S4DGI7;A0A1S4CN91;A0A1S4AYM1;A0A1S3XYI3;A0A1S4BX56	dynamin-related protein 3B-like isoform X1; dynamin-related protein 3A-like	LOC107828206;LOC107793317	8.5	6	91.438			63797000	69658000	75876000	69777000	58349000	68238000	61672000	62753000	1.11193
A0A1S3ZJR2	Dynein light chain	LOC107787661	22.7	2	13.175			31277000	24072000	17856000	2.44017e+07	22789000	27548000	25015000	2.51173e+07	0.971507
A0A1S4C9D4;A0A1S3ZGD7	E1 ubiquitin-activating enzyme	LOC107816375;LOC107786522	31.6	25	120.12			1313800000	1217000000	1241000000	1.25727e+09	1305800000	1253600000	1233900000	1.26443e+09	0.994332
A0A1S4A564;A0A1S4DH95	E1 ubiquitin-activating enzyme	LOC107793857;LOC107829766	14.3	5	121.65			70270000	72916000	71152000	71446000	104300000	74573000	112290000	9.70543e+07	0.736144
A0A1S3ZYK4;A0A1S3XVI0	E3 ubiquitin-protein ligase KEG-like; uncharacterized protein LOC107769193	LOC107791811;LOC107769193	3.6	2	69.998			34764000	29429000	18975000	2.77227e+07	58655000	34592000	44051000	45766000	0.605748
A0A1S3Y0G0;A0A1S4ADG8;A0A1S4BVV4;A0A1S4AUU3	early nodulin-like protein 1	LOC107770784;LOC107796455	27.2	4	19.572			138370000	148340000	128810000	1.38507e+08	159140000	124980000	128040000	1.37387e+08	1.00815
A0A1S3Z8Q0;A0A1S3ZC64	early nodulin-like protein 1	LOC107784202;LOC107785203	31.6	4	22.858			85447000	72910000	76950000	7.84357e+07	123840000	82559000	108560000	1.04986e+08	0.747104
A0A1S3ZUU4;A0A1S3ZMG5	early nodulin-like protein 1; stellacyanin-like	LOC107790747;LOC107788399	4.5	1	21.971			20265000	13539000	18959000	1.75877e+07	22607000	18542000	19998000	2.03823e+07	0.862888
A0A1S3YB08	early nodulin-like protein 2	LOC107774426	21	6	40.043			1469800000	1430600000	1387400000	1.42927e+09	2030800000	1828700000	1761900000	1873800000	0.762764
A0A1S4BMJ4	early nodulin-like protein 2	LOC107809888	16	4	39.014			491710000	501520000	490910000	4.94713e+08	560090000	528280000	628830000	572400000	0.864279
A0A1S4C9Y6	early nodulin-like protein 3	LOC107816699	27.1	1	19.812			11376000	11627000	12475000	11826000	14212000	11405000	16881000	14166000	0.834816
U3PVV5	EF1 protein	LOC107777013	7.2	1	28.582			9437200	0	5686600	5.04127e+06	7999700	7275300	0	5.09167e+06	0.990101
A0A1S4BDJ2	EGY2	LOC107807111	2.9	1	58.592			18271000	13761000	15537000	1.58563e+07	21854000	15381000	0	1.24117e+07	1.27753
A0A1S4AKB2;A0A1S4BRU6;A0A1S4BKZ4	eIF-2-alpha kinase activator GCN1 isoform X1	LOC107798395	2.3	5	288.3			59335000	51358000	53576000	5.47563e+07	48379000	41605000	30754000	40246000	1.36054
A0A1S4CSY3;A0A1S3YWD5;A0A1S3YL40	eIF-2B GDP-GTP exchange factor subunit alpha	LOC107822215;LOC107780329	3.3	1	43.661			0	0	0	0	0	0	0	0	#DIV/0!
Q9FXS7	EIG-I24 protein	EIG-I24	11.3	5	50.008			169970000	148720000	156920000	1.58537e+08	157970000	156390000	162040000	158800000	0.998342
A0A1S3XC77;A0A1S4C3R5	Electron transfer flavoprotein subunit alpha	LOC107763455;LOC107814851	4.5	2	37.082			175570000	197320000	157650000	1.76847e+08	160780000	165400000	179130000	1.68437e+08	1.04993
A0A1S3ZPZ0;A0A1S4BLK5	elicitor-responsive protein 3-like	LOC107789163;LOC107809618	19	2	16.311			16992000	20415000	33873000	23760000	22136000	31564000	15573000	23091000	1.02897
A0A1S4BVP1;A0A1S3ZY31	Elongation factor 1-alpha	LOC107812355;LOC107791623	55.5	25	49.316			14074000000	14429000000	15124000000	1.45423e+10	13179000000	13658000000	14028000000	1.36217e+10	1.06759
A0A1S4DJU8;A0A1S4D8J9;A0A1S3X9P5;A0A1S3XGC5;A0A1S3XT35	Elongation factor 1-alpha	LOC107830554;LOC107827212	55.5	5	49.318			876150000	1025900000	995880000	9.65977e+08	824130000	828990000	764980000	8.06033e+08	1.19843
P93769;P43643;A0A1S4D4L2;A0A1S3ZZV1;A0A1S4D4G0	Elongation factor 1-alpha	tel1	55.5	1	49.322	+		0	0	0	0	0	0	7161100	2.38703e+06	0
A0A1S4BU79;A0A1S4BW87	elongation factor 1-beta-like	LOC107811954	64.6	12	24.457			3574900000	3808900000	3497400000	3.62707e+09	3855000000	3569700000	3854400000	3759700000	0.964722
A0A1S3WZX1	elongation factor 1-beta-like	LOC107759618	55.3	1	24.501			450980000	407770000	401840000	4.20197e+08	498140000	412670000	435120000	4.48643e+08	0.936594
A0A1S3ZYH7	elongation factor 1-delta 1-like isoform X1	LOC107791787	73.2	18	25.621			4578200000	4383400000	4708400000	4.55667e+09	4384500000	4520600000	4533000000	4.47937e+09	1.01726
A0A1S4CIN9	elongation factor 1-delta 1-like isoform X1	LOC107819488	73.2	3	25.62			451450000	476940000	459550000	4.62647e+08	517770000	476680000	444460000	4.79637e+08	0.964577
A0A1S3ZML9	elongation factor 1-gamma 2-like isoform X1	LOC107788457	36.5	2	47.5			326600000	263510000	263860000	2.84657e+08	268440000	250490000	297330000	2.72087e+08	1.0462
A0A1S3XN07	elongation factor 1-gamma 2-like isoform X1	LOC107766924	38.6	2	47.599			257480000	219830000	259840000	2.45717e+08	153000000	288030000	155520000	198850000	1.23569
A0A1S4D975	elongation factor 1-gamma 2-like isoform X2	LOC107827359	40.3	15	47.584			2444300000	2511800000	2580300000	2.51213e+09	2080200000	2289400000	2235200000	2201600000	1.14105
A0A1S3XH72	elongation factor 1-gamma 2-like isoform X2	LOC107765173	37.6	2	47.658			133560000	106180000	140190000	1.26643e+08	35896000	127890000	110490000	9.14253e+07	1.38521
A0A1S3Y0T4;A0A1S4B6T0;A0A1S3YSZ3;A0A1S3XYY6	elongation factor 2; elongation factor 2-like	LOC107770769;LOC107805110	55	43	94.016			10289000000	10366000000	10397000000	1.03507e+10	8735200000	9529200000	9827000000	9363800000	1.10539
A0A1S4CVZ3;A0A1S4BQJ9	Elongation factor G, chloroplastic; elongation factor G-2, chloroplastic-like	LOC107823197;LOC107810852	60.5	40	86.02			8002400000	8223200000	8389300000	8.20497e+09	6230900000	7523600000	7502600000	7085700000	1.15796
A0A1S4BNL3;A0A1S3XUQ5;A0A1S3Z1A3	Elongation factor G, mitochondrial	LOC107810234;LOC107768940	3.3	2	84.148			10823000	11497000	11443000	1.12543e+07	0	11534000	15551000	9.02833e+06	1.24656
A0A1S3Y6D9	elongation factor G-1, chloroplastic-like	LOC107772698	65.2	1	24.559			76773000	82117000	71181000	7.66903e+07	53078000	71717000	64792000	6.31957e+07	1.21354
A0A1S4AVN0;A0A1S4DA79	elongation factor P-like	LOC107801762;LOC107827635	26.4	6	21.358			231470000	202120000	228560000	2.20717e+08	213800000	209600000	219490000	2.14297e+08	1.02996
A0A1S4BZK6	Elongation factor Ts, mitochondrial	LOC107813570	45	50	114.18			9448500000	9109700000	9049500000	9.20257e+09	10930000000	9889700000	9530900000	1.01169e+10	0.909626
A0A1S4DCB8	Elongation factor Ts, mitochondrial	LOC107828218	56.3	2	36.227			125730000	119260000	118310000	121100000	172320000	167160000	142950000	160810000	0.753063
A0A1S4CBU7;A0A1S3Z9Y3	Elongation factor Ts, mitochondrial	LOC107817322;LOC107784621	6.6	2	43.251			0	0	0	0	0	9771000	10616000	6.79567e+06	0
A0A1S4CLZ9	Elongation factor Tu	LOC107820323	62.7	8	52.688			2642000000	2720900000	2982600000	2.78183e+09	1451900000	2168600000	2347800000	1.98943e+09	1.3983
A0A1S4C0X2;A0A1S3X9Y9;A0A1S4B235	Elongation factor Tu	LOC107813892;LOC107762844	28.9	9	49.145			232680000	242460000	232170000	235770000	191220000	212410000	252920000	218850000	1.07731
P68158;A0A1S4AQT9	Elongation factor Tu, chloroplastic; Elongation factor Tu	TUFA;LOC107800308	66.1	25	51.956			11373000000	11621000000	11396000000	1.14633e+10	9064200000	10067000000	11355000000	1.01621e+10	1.12805
A0A1S4CSG9	elongation factor TuB, chloroplastic-like	LOC107822214	76	1	16.536			438140000	602500000	509290000	5.16643e+08	306720000	336050000	489950000	3.77573e+08	1.36833
A0A1S3XA93;A0A1S3Y6N2;A0A1S3YFH8	endo-1,31,4-beta-D-glucanase-like	LOC107762850	54.8	13	25.909			821760000	847190000	853750000	840900000	1121100000	887420000	1033800000	1.01411e+09	0.829203
A0A1S3Y995	endo-1,31,4-beta-D-glucanase-like	LOC107773627	33.7	1	17.938			76941000	59161000	74843000	70315000	105920000	94465000	82386000	94257000	0.745992
P24091;A0A1S4D7J1;P08252;A0A1S3WXF3	Endochitinase B; endochitinase B; Endochitinase A	CHN50;LOC107826794	42.9	11	34.721			826310000	931990000	846480000	868260000	1035500000	977090000	866770000	9.59787e+08	0.904639
A0A1S3YRD6;A0A1S4AT26	endochitinase EP3-like	LOC107778881;LOC107800989	23.5	3	25.798			42783000	37270000	24086000	34713000	24595000	0	39401000	21332000	1.62727
A0A1S4CHV0	Endoglucanase	LOC107819005	7.2	3	57.195			34651000	28295000	30502000	3.11493e+07	25847000	23727000	27895000	25823000	1.20626
A0A1S4B2P7;A0A1S3ZF73;A0A1S4CQC9	Endoglucanase; Cellulase	LOC107803827;LOC107786197	4.3	2	56.097			0	0	10669000	3.55633e+06	19915000	9847100	0	9920700	0.358476
A0A1S4AIB6;A0A1S3ZZW6	Endoplasmic reticulum transmembrane protein	LOC107797987;LOC107792206	15.3	1	14.855			28096000	25914000	21856000	2.52887e+07	25427000	25499000	29912000	26946000	0.938494
A0A1S4B8M0;A0A1S3ZUE0	Endoplasmic reticulum transmembrane protein	LOC107805719;LOC107790521	10.1	1	14.927			22048000	18039000	24512000	21533000	17864000	20631000	0	1.28317e+07	1.67811
A0A1S4C9T0	endoplasmin homolog	LOC107816676	31.7	3	93.196			59202000	55671000	60828000	58567000	56049000	48706000	51930000	5.22283e+07	1.12136
A0A1S4C9T5	endoplasmin homolog	LOC107816677	31.2	2	93.068			29357000	33686000	30999000	3.13473e+07	26602000	30204000	21163000	2.59897e+07	1.20615
A0A1S3XUV5	endoplasmin homolog	LOC107769069	29.1	1	92.928	+		0	0	0	0	0	0	0	0	#DIV/0!
A0A1S3XM28;A0A1S4A837	enhancer of mRNA-decapping protein 4-like	LOC107766595;LOC107794736	9.1	7	133.86			97800000	109640000	105390000	1.04277e+08	103460000	102870000	107460000	1.04597e+08	0.996941
A0A1S4AB39	enhancer of mRNA-decapping protein 4-like	LOC107795664	5.6	3	154.11			20762000	17107000	12889000	1.69193e+07	15834000	15215000	21573000	1.75407e+07	0.964578
A0A1S4CN68	enolase-phosphatase E1-like isoform X1	LOC107820883	63.4	37	86.695			1398400000	1314700000	1343700000	1.35227e+09	2084900000	1789000000	1791600000	1888500000	0.716053
A0A1S4AJY9	enoyl-[acyl-carrier-protein] reductase [NADH] 2, chloroplastic-like	LOC107798520	21.2	3	41.288			124870000	123170000	116740000	1.21593e+08	127430000	123560000	119330000	123440000	0.98504
A0A1S3Z0C5	enoyl-[acyl-carrier-protein] reductase [NADH] 2, chloroplastic-like	LOC107781379	21.2	1	41.358			22686000	14855000	22237000	19926000	15256000	14119000	17301000	1.55587e+07	1.2807
A0A1S4BL57	enoyl-[acyl-carrier-protein] reductase [NADH], chloroplastic-like	LOC107809441	28.1	2	41.765			67946000	60363000	54697000	61002000	85295000	96529000	79767000	87197000	0.699588
O04946	Enoyl-ACP reductase	enr-T2	40.3	12	41.779			1885500000	1791300000	1929100000	1.86863e+09	2047100000	2042400000	2087600000	2.05903e+09	0.907529
A0A1S3YBI5;A0A1S3Z4Y2;A0A1S3YVL2	epimerase family protein SDR39U1 homolog, chloroplastic-like	LOC107774381	24	5	34.857			236970000	241970000	225840000	2.34927e+08	245580000	291970000	261740000	266430000	0.881758
A0A1S4C767;A0A1S3ZKI5	ER membrane protein complex subunit 4	LOC107815857;LOC107787939	15.2	2	19.389			11827000	14937000	10468000	1.24107e+07	0	11610000	11931000	7847000	1.58158
A0A1S4C596	ERBB-3 BINDING PROTEIN 1	LOC107815326	61.5	3	42.75			132520000	133630000	151990000	139380000	189160000	212730000	160160000	187350000	0.743955
A0A1S4AKT9	ERBB-3 BINDING PROTEIN 1-like	LOC107798540	57.1	19	42.792			1884500000	1676600000	1712200000	1.75777e+09	2176100000	1873700000	1748700000	1.93283e+09	0.909425
A0A1S4BYJ2	ERBB-3 BINDING PROTEIN 1-like	LOC107813246	62.9	10	43.523			535550000	550180000	541010000	5.42247e+08	606740000	535930000	579050000	5.73907e+08	0.944834
A0A1S4B0L1;A0A1S4CWK6	ERBB-3 BINDING PROTEIN 1-like	LOC107803311	60.9	2	43.464			99852000	117370000	111770000	109664000	126100000	132280000	115240000	124540000	0.880552
Q40465;A0A1S4B5X7;Q40469	Eukaryotic initiation factor 4A-11; eukaryotic initiation factor 4A-11	LOC107804833	56.2	1	46.901			92378000	141520000	160690000	1.31529e+08	78280000	78251000	139080000	98537000	1.33482
A0A1S3XE25;Q40467;Q40466	eukaryotic initiation factor 4A-14; Eukaryotic initiation factor 4A-14	LOC107764101	59.8	2	46.903			231730000	268450000	271200000	2.57127e+08	189320000	259910000	249030000	2.32753e+08	1.10472
A0A1S3YSD8;A0A1S3XYU0	eukaryotic initiation factor 4A-3-like; eukaryotic initiation factor 4A-3	LOC107779209;LOC107770285	19.3	6	46.056			20485000	18978000	20083000	1.98487e+07	20623000	14622000	18657000	1.79673e+07	1.10471
Q40471	Eukaryotic initiation factor 4A-9		60	1	46.825			25496000	15251000	15321000	1.86893e+07	0	0	0	0	#DIV/0!
A0A1S3YM69;Q40468;A0A1S4C3S7;A0A1S4CRR1;A0A1S4B706;P41381;A0A1S3ZZM7;A0A1S3Y5M4;A0A1S4DL27;A0A1S3ZXK0;A0A1S3X6C2;A0A1S4A0A0	eukaryotic initiation factor 4A-9-like; Eukaryotic initiation factor 4A-15	LOC107777566	61.7	26	46.86			3568200000	3520700000	3755000000	3.61463e+09	2537300000	3053400000	2991600000	2.86077e+09	1.26352
A0A1S3ZTG2;A0A1S4AH77	eukaryotic peptide chain release factor GTP-binding subunit ERF3A-like	LOC107790262	34.8	15	55.21			526280000	522260000	598930000	5.49157e+08	663280000	584940000	607830000	6.18683e+08	0.887622
A0A1S3ZPP8	eukaryotic peptide chain release factor GTP-binding subunit ERF3A-like isoform X1	LOC107788982	35.5	2	59.435			32141000	41524000	35380000	3.63483e+07	45202000	41743000	40737000	4.25607e+07	0.854036
A0A1S4D298;A0A1S4AAB6;A0A1S3XZN7;A0A1S3XFU2	eukaryotic peptide chain release factor subunit 1-3-like isoform X1; eukaryotic peptide chain release factor subunit 1-3-like	LOC107825127	2.5	1	48.87			13004000	0	0	4.33467e+06	0	9665300	0	3.22177e+06	1.34543
A0A1S3XJN0;A0A1C8FVK7	eukaryotic translation initiation factor 2 subunit alpha-like; Eukaryotic translation initiation factor 2 subunit alpha	LOC107765718	15.7	3	37.997			82001000	94122000	71864000	8.26623e+07	73907000	70657000	0	48188000	1.71541
A0A1S3X5F8;Q40554;A0A1S3Z3K3	Eukaryotic translation initiation factor 3 subunit A	LOC107761510;TIF3A1	1	1	111.5			13433000	13672000	15471000	14192000	10940000	13605000	13559000	1.27013e+07	1.11736
A0A1S4BA51	Eukaryotic translation initiation factor 3 subunit B	LOC107806139	3.4	2	78.13			10092000	11112000	10309000	1.05043e+07	0	0	6400200	2133400	4.92375
A0A1S4BYW3;A0A1S4BAS1	Eukaryotic translation initiation factor 3 subunit D	LOC107813351	6.1	2	52.783			25774000	21537000	23010000	2.34403e+07	22367000	20578000	30041000	2.43287e+07	0.963486
A0A1S4AUF0;A0A1S3XPL9	Eukaryotic translation initiation factor 3 subunit E	LOC107801330	17.6	7	51.138			88114000	117810000	92851000	9.95917e+07	108620000	97188000	82019000	9.59423e+07	1.03804
A0A1S3ZLB1;A0A1S3XJX0;A0A1S4AS02;A0A1S4ADF2	Eukaryotic translation initiation factor 3 subunit F	LOC107787937	10.5	3	31.395			32605000	31655000	34717000	3.29923e+07	31424000	33358000	31848000	32210000	1.02429
A0A1S4DG37;A0A1S4B978	Eukaryotic translation initiation factor 3 subunit G	LOC107829260	18.7	5	32.365			60311000	66068000	51549000	5.93093e+07	64329000	58474000	48539000	57114000	1.03844
A0A1S4DCB4;A0A1S3ZQ64;A0A1S4B7I7;A0A1S4B7F5	Eukaryotic translation initiation factor 3 subunit H	LOC107828315	15.1	3	38.697			72599000	45034000	50772000	56135000	69537000	55375000	0	4.16373e+07	1.34819
A0A1S3ZGF1;A0A1S4DNS6	Eukaryotic translation initiation factor 3 subunit I	LOC107786562	13.8	4	35.955			82592000	96768000	87179000	8.88463e+07	72272000	69311000	79429000	7.36707e+07	1.20599
A0A1S4DLH9;A0A1S3Y190;A0A1S3X336;A0A1S4ALP9	Eukaryotic translation initiation factor 3 subunit J	LOC107831054	19.6	4	25.239			79979000	66638000	89686000	7.87677e+07	98126000	93260000	91498000	9.42947e+07	0.835335
A0A1S3ZPV7;A0A1S3XR14	Eukaryotic translation initiation factor 3 subunit K	LOC107789133	20.8	3	26.316			36824000	40642000	31770000	36412000	0	38077000	0	1.26923e+07	2.86882
A0A1S3XKL8	Eukaryotic translation initiation factor 3 subunit L	LOC107766223	11.2	6	60.655			68035000	79015000	65660000	7.09033e+07	54853000	61982000	52711000	5.65153e+07	1.25459
A0A1S4C5S4;A0A1S3ZNA2	Eukaryotic translation initiation factor 3 subunit M	LOC107815465	2.7	1	46.429			0	0	0	0	0	0	0	0	#DIV/0!
A0A1S4AT72;A0A1S4AM43;A0A1S3Z0C4	eukaryotic translation initiation factor 3 subunit M-like; Eukaryotic translation initiation factor 3 subunit M	LOC107801165	8.6	1	18.578			0	0	0	0	0	0	11010000	3670000	0
A0A1S3ZUN4;A0A1S4CYP4	eukaryotic translation initiation factor 4B3-like	LOC107790603;LOC10	4.6	2	44.879			28702000	29980000	24193000	27625000	51020000	33473000	40248000	4.15803e+07	0.664377
A0A1S4BHW2;A0A1S4BBH8;A0A1S4B3V1;A0A1S4DP29;A0A1S4CEK2	Eukaryotic translation initiation factor 4C	LOC107808437;LOC107806523	15.4	2	16.346			48384000	37108000	49544000	45012000	48701000	37741000	8492100	31644700	1.42242
A0A1S4CRP3;A0A1S4DQE3	eukaryotic translation initiation factor 4G-like isoform X1	LOC107821751	4.6	5	194.89			20993000	16295000	0	1.24293e+07	26684000	22446000	24455000	2.45283e+07	0.506734
A0A075EYQ6	Eukaryotic translation initiation factor 5A	eIF-5A3	39.6	8	17.363			1596800000	1304800000	1394300000	1.43197e+09	1859100000	1488500000	1554500000	1.63403e+09	0.876339
A0A1S3ZPB2	Eukaryotic translation initiation factor 5A	LOC107788880	51.2	4	17.51			914630000	732190000	810970000	8.19263e+08	951510000	903500000	846560000	9.00523e+08	0.909764
A0A1S4A482	Eukaryotic translation initiation factor 5A	LOC107793525	39.6	1	17.39			34108000	38555000	34571000	3.57447e+07	46838000	31366000	28817000	3.56737e+07	1.00199
A0A1S3YXL3;A0A077D849	Eukaryotic translation initiation factor 5A	LOC107780536;LOC107788104	33.1	1	17.555			28984000	37704000	0	2.22293e+07	20116000	23574000	33503000	25731000	0.863913
A0A1S4AUN0	Eukaryotic translation initiation factor 5A	LOC107801550	51.2	2	17.44			20827000	23608000	25219000	23218000	27072000	25191000	27138000	26467000	0.877243
A0A1S4DD78;A0A1S3ZSW6	Eukaryotic translation initiation factor 6	LOC107828571;LOC107790111	4.5	1	26.416			70713000	56224000	60721000	6.25527e+07	64415000	62612000	64917000	6.39813e+07	0.977671
Q66WU1	Eukaryotic translation initiation factor isoform 4E	eIFiso4E	16	3	22.851			74764000	67927000	76730000	7.31403e+07	104530000	99441000	66069000	9.00133e+07	0.81255
A0A1S3Y3A2	eukaryotic translation initiation factor-like	LOC107771688	15.4	11	85.213			224810000	228930000	239700000	2.31147e+08	252740000	242190000	242210000	2.45713e+08	0.940717
A0A1S3YL73	eukaryotic translation initiation factor-like isoform X1	LOC107777479	15.2	6	86.154			67685000	64242000	69796000	67241000	60357000	67948000	87211000	7.18387e+07	0.936
A0A1S4B661	eukaryotic translation initiation factor-like isoform X1	LOC107804862	12	1	86.042			9731000	0	14705000	8.14533e+06	6900400	15694000	10593000	1.10625e+07	0.736304
A0A1S3YZ17	eukaryotic translation initiation factor-like isoform X1	LOC107781403	12.3	2	85.234			0	0	26986000	8.99533e+06	39658000	31200000	45767000	38875000	0.231391
A0A1S3ZZ89;A0A1S4BWI4	exocyst complex component SEC10-like; exocyst complex component SEC10-like isoform X1	LOC107791982;LOC107812624	6.6	2	34.847			0	0	0	0	0	0	21989000	7.32967e+06	0
A0A1S4DHK8;A0A1S3XGV2	exosome complex exonuclease RRP44 homolog A-like	LOC107829893;LOC1077	2.7	1	104.6			0	0	0	0	0	0	0	0	#DIV/0!
A0A1S4AVA3	expansin-like A2	LOC107801681	11.8	3	28.442			38037000	42748000	25485000	3.54233e+07	63522000	66464000	58649000	6.28783e+07	0.563363
A0A1S4CLW0	expansin-like A2	LOC107820468	7.9	1	28.98			0	4572500	0	1.52417e+06	0	0	6626700	2208900	0.690012
A0A1S3Y175;A0A1S3YR11	exportin-2-like	LOC107771071;LOC107778826	3.8	3	109.57			22647000	15568000	17836000	1.86837e+07	15844000	14816000	14543000	1.50677e+07	1.23998
A0A1S3ZCC0	extensin-like	LOC107785335	10.8	1	51.263			0	12096000	0	4032000	16927000	27857000	17177000	2.06537e+07	0.19522
A0A1S3Y6Y1;A0A1S4D7A0;A0A1S4C9P7	extensin-like; pollen-specific leucine-rich repeat extensin-like protein 2	LOC107772742;LOC107826716	5.2	2	58.846			7326600	0	0	2442200	0	7617000	0	2539000	0.961875
A0A1S4C0S9;A0A1S4BDC3;A0A1S3ZH95;A0A1S4BUD6;A0A1S3XFN0	FAD synthase-like	LOC107813953;LOC107807061	4.2	2	50.25			0	0	0	0	0	0	0	0	#DIV/0!
A0A1S4CYK3;A0A1S3YTV3	FAM10 family protein At4g22670-like	LOC107823999;LOC107779484	22.9	10	44.134			294850000	280840000	289910000	2.88533e+08	335410000	269460000	281020000	2.95297e+08	0.977096
A0A1S3Z8F4;A0A1S4B557;A0A1S4A0H0	FAM10 family protein At4g22670-like; FAM10 family protein At4g22670-like isoform X1	LOC107784193;LOC107804585	21.9	4	45.118			191570000	1105900	158960000	1.17212e+08	0	107510000	0	3.58367e+07	3.27073
A0A1S3YSU6	far upstream element-binding protein 1-like isoform X1	LOC107779386	21.1	10	84.124			248810000	243260000	207780000	2.33283e+08	270400000	247040000	246790000	2.54743e+08	0.915758
A0A1S3YUC6	far upstream element-binding protein 1-like isoform X1	LOC107779634	15.2	3	84.757			96451000	98801000	94575000	96609000	111640000	98747000	118210000	1.09532e+08	0.882014
A0A1S4DHR7;A0A1S4C1L3;A0A1S4ATZ6;A0A1S3YBI6	far upstream element-binding protein 2-like isoform X1; far upstream element-binding protein 1-like isoform X1	LOC107829954	21.6	10	68.057			711860000	647890000	641150000	6.66967e+08	781310000	613410000	699550000	698090000	0.955416
A0A1S3YVG4;A0A1S4BBL2;A0A1S4ABD1;A0A1S3XHA2	farnesyl pyrophosphate synthase 1-like	LOC107779968;LOC107806551	21.3	6	39.515			253800000	227220000	244480000	2.41833e+08	186150000	198150000	214210000	1.99503e+08	1.21218
A0A1S4CDZ9	fasciclin-like arabinogalactan protein 1	LOC107817819	34.4	8	43.999			1098800000	1188500000	1236400000	1.17457e+09	1583800000	1474100000	1306700000	1.45487e+09	0.807336
A0A1S4DFI0;A0A1S4CQ01	fasciclin-like arabinogalactan protein 1	LOC107829257;LOC107821223	27.7	4	28.92			378060000	344540000	306240000	3.42947e+08	485400000	292460000	327180000	3.68347e+08	0.931043
A0A1S4C8B7	fasciclin-like arabinogalactan protein 1	LOC107816302	34.4	1	43.998			69397000	59782000	67357000	65512000	76379000	72486000	65397000	7.14207e+07	0.91727
A0A1S4AJ21;A0A1S4BC16	fasciclin-like arabinogalactan protein 1	LOC107798150;LOC107806676	10.5	2	32.043			37189000	0	35153000	24114000	31920000	0	0	10640000	2.26635
A0A1S4CYF0;A0A1S4DQ31;A0A1S3X828	fasciclin-like arabinogalactan protein 17	LOC107823842;LOC107832235	6.2	2	49.391			84280000	109270000	93529000	95693000	131750000	99453000	108520000	113241000	0.845038
A0A1S3YT33	fasciclin-like arabinogalactan protein 2	LOC107779390	31.7	11	43.81			447920000	443760000	497230000	462970000	558360000	462860000	454460000	4.91893e+08	0.9412
A0A1S4CJJ6	fasciclin-like arabinogalactan protein 2	LOC107819769	2	1	43.041			106130000	89425000	94484000	9.66797e+07	117480000	109840000	109840000	1.12387e+08	0.860241
A0A1S3ZM15	fasciclin-like arabinogalactan protein 2	LOC107788180	30	1	43.756			56414000	42777000	45601000	48264000	48616000	37796000	43333000	4.32483e+07	1.11597
A0A1S4BGD3;A0A1S4A171	fasciclin-like arabinogalactan protein 7	LOC107807962;LOC107792706	14.3	3	28.073			201390000	139380000	124230000	155000000	196580000	163820000	184380000	1.81593e+08	0.853556
A0A1S4AMD8	fasciclin-like arabinogalactan protein 8	LOC107799234	28.2	7	43.698			2062300000	1844500000	2087700000	1.99817e+09	2472000000	2427000000	2303700000	2400900000	0.832257
A0A1S4DK84	fasciclin-like arabinogalactan protein 9	LOC107830666	23.9	7	26.537			537980000	520780000	536470000	5.31743e+08	959760000	817630000	901800000	8.93063e+08	0.595415
A0A1S3Z898	fasciclin-like arabinogalactan protein 9	LOC107784037	19.5	3	26.986			446670000	384870000	492400000	4.41313e+08	817010000	606150000	647350000	690170000	0.639427
A0A1S4DQP7	fatty-acid-binding protein 1-like	LOC107832423	23.4	6	32.269			175510000	158120000	181930000	1.71853e+08	235390000	187350000	189740000	204160000	0.841758
A0A1S3Y5G3	fatty-acid-binding protein 1-like isoform X1	LOC107772157	15.3	1	32.181			44434000	48669000	37126000	4.34097e+07	53508000	37274000	44869000	45217000	0.96003
Q3Y625;A0A1S3ZDF1;A0A1S4ART4;A0A1S3ZYJ8	F-box protein PP2-B11-like; putative F-box protein PP2-B12	LOC107785603;LOC107785604	57	9	19.061			248720000	247920000	250520000	2.49053e+08	532370000	533440000	497450000	5.21087e+08	0.47795
A0A1S3XWS8;A0A1S4AC27;A0A1S4D8G5	F-box/FBD/LRR-repeat protein At1g13570-like	LOC107769609;LOC107796012	3.8	1	20.976			45126000	83590000	40669000	5.64617e+07	84148000	59692000	70693000	71511000	0.789552
P83526;A0A1S3YVN4	Ferredoxin	LOC107780371	35.1	1	10.443			5311600000	4375200000	5243300000	4976700000	5498100000	7745600000	7262300000	6.83533e+09	0.728084
Q6Q8B8	Ferredoxin	fdn-1	23.6	1	15.378			6543000000	4428200000	5452600000	5474600000	10153000000	9037800000	9484800000	9.55853e+09	0.572745
A0A1S4B0I0	Ferredoxin	LOC107803171	41.9	5	16.191			213780000	211460000	190560000	2.05267e+08	278610000	207660000	226820000	2.37697e+08	0.863566
A0A1S4CE88;A0A1S4CXI5;A0A1S4AUL3;A0A1S3ZY06	Ferredoxin	LOC107818034	22.7	3	15.961			74815000	72508000	74081000	7.38013e+07	128210000	119350000	116700000	121420000	0.607819
A0A1S3XP56;A0A1S3ZTN7;A0A1S3Y3F1;A0A1S3XVG2	Ferredoxin	LOC107767245;LOC107790275	34	3	16.143			56204000	46492000	38213000	4.69697e+07	50341000	62118000	53539000	5.53327e+07	0.84886
A0A1S4C0U2	Ferredoxin	LOC107813963	41.9	1	16.292			0	57625000	54757000	3.74607e+07	70286000	52695000	48140000	5.70403e+07	0.65674
A0A1S4A4G8	ferredoxin-dependent glutamate synthase 1, chloroplastic/mitochondrial-like	LOC107793691	53.9	6	102.25			814150000	624530000	683580000	707420000	1050600000	1017300000	818260000	9.62053e+08	0.735323
A0A1S3Z1F3	ferredoxin-dependent glutamate synthase, chloroplastic-like	LOC107781744	61.7	82	167.72			29931000000	29629000000	28090000000	2.92167e+10	39769000000	34725000000	35096000000	36530000000	0.799799
A0A1S4CUE0	ferredoxin-dependent glutamate synthase, chloroplastic-like	LOC107822572	46.6	3	20.248			1485800000	1551500000	1476900000	1.50473e+09	2010100000	1930800000	1545600000	1.82883e+09	0.822783
A0A1S4A4N6	ferredoxin-dependent glutamate synthase, chloroplastic-like	LOC107793693	39.3	3	23.061			645520000	659890000	792800000	6.99403e+08	945020000	769580000	1010200000	9.08267e+08	0.770042
A0A1S4A4P8	ferredoxin-dependent glutamate synthase, chloroplastic-like	LOC107793692	58.6	4	57.522			491550000	524070000	519250000	5.11623e+08	614150000	577610000	584560000	5.92107e+08	0.864073
A0A1S3X0Y5	Ferredoxin--NADP reductase, chloroplastic	LOC107760150	68.2	23	40.306			30372000000	27898000000	29351000000	29207000000	35774000000	32418000000	34150000000	34114000000	0.856159
A0A1S3Y5Z1	Ferredoxin--NADP reductase, chloroplastic	LOC107772606	68.2	5	40.276			5462700000	4736000000	5344600000	5181100000	5865400000	5253100000	6369300000	5.82927e+09	0.888808
A0A1S4AIY0	Ferredoxin--NADP reductase, chloroplastic	LOC107798204	44.5	12	41.904			294090000	343090000	319180000	3.18787e+08	417400000	369020000	366730000	3.84383e+08	0.829346
A0A1S3XIR7	ferredoxin--nitrite reductase, chloroplastic-like	LOC107765655	24.3	2	65.458			277340000	266560000	294580000	2.79493e+08	333890000	321750000	339390000	3.31677e+08	0.842668
A0A1S3XFG9	ferredoxin--nitrite reductase, chloroplastic-like	LOC107764462	30.1	2	37.046			95804000	98823000	100590000	9.84057e+07	113460000	111910000	105630000	1.10333e+08	0.891894
A0A1S4AL04	ferredoxin--nitrite reductase, chloroplastic-like isoform X1	LOC107798816	60.3	31	66.954			4740200000	4362800000	4019200000	4.37407e+09	5553700000	5350200000	5400000000	5.43463e+09	0.80485
A0A1S4DHE3;A0A1S4CDE1	Ferredoxin-thioredoxin reductase catalytic chain, chloroplastic	LOC107829942	24.3	4	16.588			230240000	256690000	223230000	236720000	323300000	286180000	294130000	3.01203e+08	0.785914
A0A1S4D4V1	ferredoxin-thioredoxin reductase, variable chain-like	LOC107825900	30.5	6	18.028			779120000	726610000	641580000	715770000	890230000	902230000	785580000	8.59347e+08	0.832923
A0A1S4B5N2	ferredoxin-thioredoxin reductase, variable chain-like	LOC107804760	30.5	1	17.965			0	30019000	28871000	19630000	31115000	19285000	26856000	25752000	0.762271
A0A1S4ATT8;Q8RX97;A0A1S3ZS78;A0A1S4BKD6	Ferritin; Ferritin-1, chloroplastic	LOC107801146;FER1	10.4	3	28.186			201690000	237370000	247470000	2.28843e+08	62943000	279290000	227090000	1.89774e+08	1.20587
A0A1S4DRN8;A0A1S3YUH8;A0A1S4A936	Ferrochelatase	LOC107832463;LOC107779891	7.6	3	57.372			29342000	41173000	43241000	3.79187e+07	0	40549000	41305000	2.72847e+07	1.38974
A0A1S4DGR0;A0A1S4BA78;A0A1S3ZDW4	feruloyl CoA ortho-hydroxylase 1-like	LOC107829619;LOC107806106	7	1	19.316			65209000	45520000	15403000	42044000	60275000	34596000	95673000	6.35147e+07	0.661957
A0A1S3ZLF8;A0A1S3Z941	feruloyl CoA ortho-hydroxylase 2-like	LOC107787977;LOC107784295	5	2	40.672			7700300	10214000	0	5.97143e+06	13577000	10426000	14679000	12894000	0.463117
A0A1S4ATT2;A0A1S4A4N5	fe-S cluster assembly factor HCF101, chloroplastic-like; fe-S cluster assembly factor HCF101, chloroplastic-like isoform X1	LOC107801220	13.9	7	57.136			216560000	221210000	230420000	222730000	242260000	244400000	234920000	2.40527e+08	0.92601
A0A1S4BKH6;A0A1S3ZLU1	FGGY carbohydrate kinase domain-containing protein-like; FGGY carbohydrate kinase domain-containing protein-like isoform X1	LOC107809307	4.5	2	69.174			26047000	21711000	22300000	2.33527e+07	24348000	26676000	24348000	25124000	0.929496
A0A1S4CDL1	fimbrin-1-like	LOC107817925	3.5	1	87.447			0	0	0	0	0	0	0	0	#DIV/0!
A0A1S3ZA22	FK506-binding protein 5-like isoform X1	LOC107784592	72	29	68.625			923650000	895980000	799110000	8.72913e+08	1366400000	1137700000	1268900000	1.25767e+09	0.694074
A0A1S3ZYZ3	flagellar radial spoke protein 5-like	LOC107791917	26.3	1	45.342			30262000	27734000	36505000	3.15003e+07	25612000	31810000	14180000	2.38673e+07	1.31981
A0A1S3YF92	flagellar radial spoke protein 5-like isoform X1	LOC107775472	26.3	8	44.826			460670000	431540000	384500000	425570000	372970000	428850000	411070000	4.04297e+08	1.05262
A0A1S3ZWR4;A0A1S4CS16	Flap endonuclease 1	LOC107791227;LOC107821943	7.6	2	42.648			0	0	9506200	3.16873e+06	0	12085000	0	4.02833e+06	0.786612
A0A1S4BAY8	Flavanone 3-hydroxylase	LOC107806462	3.3	1	41.276			12001000	0	6102300	6.03443e+06	0	0	0	0	#DIV/0!
A0A1S3YS18;A0A1S4DGL6;A0A1S4D2E8;A0A1S4CDS5;A0A1S4BFB9	Flavin-containing monooxygenase	LOC107779149;LOC107829572	4.6	2	59.084			0	0	0	0	0	0	0	0	#DIV/0!
A0A1S3ZBU9	flowering locus K homology domain-like	LOC107785154	9.8	1	36.861			0	16684000	0	5.56133e+06	0	0	0	0	#DIV/0!
A0A1S3YSE8;A0A1S3ZWR7	flowering locus K homology domain-like isoform X1	LOC107779259	8.3	3	58.117			20666000	22235000	16006000	1.96357e+07	23012000	18297000	17092000	19467000	1.00866
A0A1S4CTM7;A0A1S3ZDG9	flowering locus K homology domain-like isoform X1; flowering locus K homology domain-like	LOC107822433;LOC107785621	14.2	7	55.004			141790000	154530000	117130000	1.37817e+08	156630000	145380000	144670000	1.48893e+08	0.925607
A0A1S4DKG0;A0A1S3ZB40	flowering locus K homology domain-like isoform X1; flowering locus K homology domain-like	LOC107830755;LOC107784948	11.6	4	58.737			87542000	56778000	91930000	78750000	18857000	19770000	27505000	22044000	3.5724
A0A1S4B9W3;A0A1S4DD03;A0A1S3X2L6	Folate gamma-glutamyl hydrolase	LOC107805981;LOC107828474	6.1	2	31.261			43139000	39497000	40538000	41058000	54559000	60401000	57597000	57519000	0.713816
A0A1S3Z650;A0A1S3YT05	Folylpolyglutamate synthase	LOC107783423;LOC107779364	8.8	4	60.847			47506000	62000000	55889000	5.51317e+07	48799000	62216000	59860000	5.69583e+07	0.96793
A0A1S4D9I1;A0A1S3ZHK0	Formate dehydrogenase, mitochondrial	LOC107827290;LOC107786807	26.2	8	42.458			174940000	144180000	155710000	1.58277e+08	138520000	164150000	168380000	1.57017e+08	1.00802
A0A1S4DK81	Formate--tetrahydrofolate ligase	LOC107830687	13.6	9	67.335			246500000	291050000	295650000	2.77733e+08	261070000	251550000	281540000	264720000	1.04916
A0A1S4C0L0;A0A1S4BI20	Formate--tetrahydrofolate ligase; formate--tetrahydrofolate ligase-like	LOC107813791;LOC107808503	13.6	1	67.272			23173000	18297000	21339000	2.09363e+07	16680000	26073000	16856000	1.98697e+07	1.05368
A0A1S4CCN8;A0A1S4CH99	fructokinase-2-like; fructokinase-2	LOC107817420;LOC107818999	52	14	34.815			810300000	869860000	855860000	845340000	997120000	863230000	875140000	911830000	0.927081
A0A1S3ZAM9;A0A1S4A023;A0A1S3Z9Y6;A0A1S4C719	Fructose-bisphosphatase	LOC107784747;LOC107792237	39.8	14	44.555			6090100000	5602400000	5689900000	5.79413e+09	6862600000	6326800000	6527800000	6572400000	0.881586
A0A1S4BE66	Fructose-bisphosphatase	LOC107807379	60.6	21	37.252			3760200000	3235600000	3688000000	3.56127e+09	3988600000	3687100000	3341300000	3.67233e+09	0.969756
A0A1S4DMC7	Fructose-bisphosphatase	LOC107831320	63.2	8	37.315			605600000	547580000	592100000	581760000	641320000	638850000	633020000	637730000	0.912236
A0A1S3ZMF5	Fructose-bisphosphatase	LOC107788283	51.4	3	32.088			919200000	87894000	96813000	367969000	108300000	111810000	11169000	77093000	4.77305
A0A1S4CJQ4;A0A1S3Z9P3	Fructose-bisphosphatase	LOC107819549;LOC107784541	16.4	5	45.557			93655000	76229000	86871000	85585000	80735000	91681000	102530000	9.16487e+07	0.933838
A0A1S3X1L9;A0A1S4DB33	Fructose-bisphosphatase	LOC107760211;LOC107827939	20.7	7	45.069			81325000	79024000	84116000	8.14883e+07	80480000	95853000	82011000	8.61147e+07	0.946277
A0A1S4CHR0	Fructose-bisphosphatase	LOC107819136	63.2	1	37.287			26792000	0	26378000	1.77233e+07	0	25893000	0	8631000	2.05345
A0A1S4CWV3	Fructose-bisphosphate aldolase	LOC107823486	65.6	26	42.577			48725000000	47564000000	48024000000	4.81043e+10	42234000000	48583000000	51072000000	4.72963e+10	1.01708
F2VJ75;A0A1S3Y2I1	Fructose-bisphosphate aldolase	LOC107797422;LOC107771489	63.3	11	42.805			16713000000	17164000000	17651000000	17176000000	14954000000	18285000000	18852000000	1.73637e+10	0.989192
A0A1S3XQR5	Fructose-bisphosphate aldolase	LOC107767727	71.2	22	38.563			5125000000	5295700000	5013300000	5.14467e+09	5677200000	5275100000	5454100000	5468800000	0.94073
A0A1S3YQR9	Fructose-bisphosphate aldolase	LOC107778620	56.3	15	39.857			4661100000	4502600000	4357600000	4507100000	5742800000	5247500000	5302100000	5430800000	0.829915
A0A1S4DGM0	Fructose-bisphosphate aldolase	LOC107829473	56.6	5	42.697			4337000000	3878300000	4171900000	4.12907e+09	3805600000	4283500000	3982500000	4.02387e+09	1.02614
A0A1S3WYR8;A0A1S3ZX13	Fructose-bisphosphate aldolase	LOC107759369;LOC107791431	58.4	8	42.833			3853000000	3921900000	3820300000	3.86507e+09	3920300000	3874700000	4239800000	4011600000	0.963473
A0A1S3Z8Z4	Fructose-bisphosphate aldolase	LOC107784332	53	3	28.553			2234200000	2115000000	2124000000	2.15773e+09	1817600000	2221400000	2126800000	2.05527e+09	1.04986
A0A1S4CXS6	Fructose-bisphosphate aldolase	LOC107823750	60.1	9	38.568			961100000	974090000	979690000	9.71627e+08	1127300000	933410000	944570000	1001760000	0.96992
A0A1S3Z8U8	Fructose-bisphosphate aldolase	LOC107784214	58.3	6	38.162			991720000	1058600000	932750000	9.94357e+08	1195200000	956540000	1198000000	1116580000	0.890538
A0A1S4BD66	Fructose-bisphosphate aldolase	LOC107807065	57.6	3	42.758			1099400000	1007100000	1117100000	1.07453e+09	935040000	967610000	1267400000	1.05668e+09	1.01689
A0A1S3XQ62	Fructose-bisphosphate aldolase	LOC107767559	55.8	1	42.692			676120000	641870000	699270000	672420000	596270000	668400000	763810000	676160000	0.994469
A0A1S4D0G2	Fructose-bisphosphate aldolase	LOC107824494	26.1	6	42.91			557480000	587440000	538730000	5.61217e+08	467320000	520950000	552880000	5.13717e+08	1.09246
A0A1S3Z0N4	Fructose-bisphosphate aldolase	LOC107781715	52	2	38.624			99220000	103260000	100010000	100830000	102240000	102450000	97343000	1.00678e+08	1.00151
A0A1S4CQ40	Fructose-bisphosphate aldolase	LOC107821177	71.2	1	38.506			66360000	59787000	58406000	6.15177e+07	100440000	88963000	93485000	94296000	0.652389
A0A1S4AU61	fruit protein pKIWI501-like	LOC107801407	98.9	5	9.3251			509400000	486740000	435190000	477110000	601010000	531300000	541510000	557940000	0.855128
A0A1S4A1N0	fruit protein pKIWI502-like	LOC107792815	48.4	12	33.331			1249900000	1323600000	1222300000	1.26527e+09	1289000000	1321500000	1295000000	1.30183e+09	0.971911
A0A1S3XLX4	fruit protein pKIWI502-like	LOC107766402	48.2	2	33.331			147010000	222340000	162920000	1.77423e+08	211490000	150700000	185540000	1.82577e+08	0.971774
Q9XG68	FtsZ-like protein	FtsZ	19.3	6	43.887			134200000	104040000	124870000	1.21037e+08	102900000	132070000	110610000	1.15193e+08	1.05073
Q95DV5;A0A1S3YKN0	FtsZ-like protein; cell division protein FtsZ homolog 2-2, chloroplastic-like isoform X2	ftsZ;LOC107777306	30.3	10	49.174			354520000	332610000	366880000	3.51337e+08	268880000	307130000	316550000	297520000	1.18088
A0A1S3YK19;A0A1S4DL97;A0A1S3WYC1;A0A1S4CZS4	Fumarate hydratase; fumarate hydratase 1, mitochondrial-like	LOC107776946;LOC107830969	16.3	6	50.415			200290000	214200000	222050000	212180000	172390000	206560000	221310000	2.00087e+08	1.06044
A0A1S4CDD3	Fumarylacetoacetase	LOC107817619	14.3	4	45.834			78761000	81232000	81874000	8.06223e+07	75403000	66914000	95733000	79350000	1.01603
A0A1S3YMJ8	Fumarylacetoacetase	LOC107777843	7.4	1	45.88			32391000	24721000	25658000	27590000	22408000	24278000	31576000	2.60873e+07	1.0576
A0A1S3Y789;A0A1S3Z079	Galactinol--sucrose galactosyltransferase	LOC107773108;LOC107781630	7.4	5	93.771			53456000	50585000	55132000	5.30577e+07	45355000	74904000	67091000	62450000	0.849602
A0A1S4BD28;A0A1S4BYM4;A0A1S3Y1T1	galactokinase-like	LOC107806963;LOC107813265	24.8	11	54.443			231030000	234080000	206080000	223730000	246400000	229870000	282750000	2.53007e+08	0.884285
A0A1S4AZA4;A0A1S3X0N1;A0A1S4BAN4;A0A1S3ZRM1;A0A1S3X007	gamma aminobutyrate transaminase 1, mitochondrial isoform X1; gamma aminobutyrate transaminase 3, chloroplastic-like	LOC107802933	26.2	10	56.939			275050000	262060000	250650000	2.62587e+08	313990000	268170000	310460000	297540000	0.882526
A0A1S4CP92;A0A1S4DRP0;A0A1S3Z998;A0A1S3Z4Y6	gamma aminobutyrate transaminase 3, chloroplastic isoform X1; gamma aminobutyrate transaminase 3, chloroplastic-like isoform X1	LOC107821173	12.3	3	56.427			43887000	44975000	42407000	4.37563e+07	45579000	38579000	30457000	38205000	1.1453
A0A1S4C3H9;A0A1S3XBU0	gamma carbonic anhydrase 1, mitochondrial-like	LOC107814673;LOC10776325	18.7	4	29.067			51769000	59197000	82086000	6.43507e+07	45874000	53586000	83514000	6.09913e+07	1.05508
A0A1S4CWF3;A0A1S4BMN9	gamma carbonic anhydrase 1, mitochondrial-like isoform X2; gamma carbonic anhydrase 1, mitochondrial-like	LOC107823359;	5.2	1	29.492			0	0	0	0	0	0	0	0	#DIV/0!
A0A1S4CSZ5;A0A1S4CJH7	gamma carbonic anhydrase 2, mitochondrial-like; gamma carbonic anhydrase 1, mitochondrial-like	LOC107822138;LOC10781955	37.4	7	29.513			188820000	192160000	180490000	1.87157e+08	129710000	185880000	200540000	1.72043e+08	1.08785
A0A1S4DR53	gamma carbonic anhydrase-like 2, mitochondrial	LOC107832307	17.5	3	27.628			27085000	14534000	27359000	2.29927e+07	18078000	21394000	19539000	1.96703e+07	1.1689
A0A1S4A5E1;A0A1S4A5A5;A0A1S4ANJ7	gamma-interferon-inducible lysosomal thiol reductase-like; GILT-like protein F37H8.5	LOC107793859;LOC107793858	9.1	2	28.531			51513000	39063000	50612000	4.70627e+07	63316000	48200000	61721000	5.77457e+07	0.814999
A0A1S4ARI5;A0A1S3ZMI3;A0A1S3XY62	gamma-soluble NSF attachment protein-like	LOC107800454;LOC107788406	5	1	22.57			9479800	10862000	12080000	1.08073e+07	13180000	16850000	0	10010000	1.07965
A0A1S3YAQ1	Gamma-tubulin complex component	LOC107774218	4.4	1	58.883			0	73153000	55345000	4.28327e+07	53072000	0	0	1.76907e+07	2.4212
A0A1S3YHI6	GATA type zinc finger protein asd-4-like	LOC107776224	92.4	20	21.563			6667400000	6102800000	6487200000	6.41913e+09	9545800000	8310600000	8343200000	8733200000	0.735026
A0A1S4DP32;A0A1S4A2F2	GDP-L-fucose synthase	LOC107831894;LOC107793042	9.9	3	34.753			46348000	39546000	33479000	39791000	32978000	42652000	40043000	3.85577e+07	1.03199
A0A1S4D5X6	GDP-mannose 3,5-epimerase 1	LOC107826294	52.4	4	42.466			147380000	154890000	142330000	148200000	153090000	135500000	123670000	137420000	1.07845
A0A1S4AGN4	GDP-mannose 3,5-epimerase 1-like	LOC107797479	64.4	26	42.575			4205100000	4345300000	4004100000	4.18483e+09	3426000000	4122300000	4240400000	3.92957e+09	1.06496
A0A1S4BXE7	GDP-mannose 3,5-epimerase 1-like	LOC107812799	53.7	2	42.468			0	0	17580000	5860000	0	16212000	13673000	9.96167e+06	0.588255
A0A1S4CAZ2	GDP-mannose 3,5-epimerase 1-like	LOC107817046	64.4	1	42.589			0	34559000	42560000	2.57063e+07	53730000	38571000	40534000	4.42783e+07	0.580562
A0A1S4D8M4;A0A1S3YJX7	GDP-mannose 4,6-dehydratase	LOC107827017;LOC107776909	7.1	1	41.482			0	21145000	0	7.04833e+06	0	0	0	0	#DIV/0!
A0A1S3XW44	GDSL esterase/lipase APG-like	LOC107769403	37.6	9	38.247			274100000	245780000	264920000	261600000	254990000	256020000	267730000	259580000	1.00778
A0A1S4DGG8	GDSL esterase/lipase APG-like	LOC107829515	34.7	1	38.216			0	19027000	5254500	8.09383e+06	0	0	7592900	2.53097e+06	3.19792
A0A1S4CCM3;A0A1S4DDB7	GDSL esterase/lipase At1g09390-like	LOC107817553;LOC107828419	3.4	1	38.813			19710000	20242000	15433000	1.84617e+07	21358000	19159000	0	1.35057e+07	1.36696
A0A1S3XUV8	GDSL esterase/lipase At1g28590-like	LOC107768840	30.6	9	41.15			597190000	597200000	622850000	6.05747e+08	641310000	671650000	584110000	6.32357e+08	0.957919
A0A1S3ZEQ4;A0A1S3Y7B0	GDSL esterase/lipase At1g29670-like	LOC107785876;LOC107773215	14.9	2	28.857			25624000	20243000	25842000	23903000	24086000	38844000	22282000	28404000	0.841536
A0A1S3XHA6;A0A1S3X6N4	GDSL esterase/lipase At1g29670-like	LOC107765206;LOC107761814	4.7	1	39.782			0	12273000	10712000	7.66167e+06	13618000	0	11358000	8.32533e+06	0.920283
A0A1S4D4U9;A0A1S4BLM6	GDSL esterase/lipase At1g54790-like	LOC107826017;LOC107809642	13.6	3	41.895			0	37859000	20622000	1.94937e+07	36555000	21596000	17706000	2.52857e+07	0.770937
A0A1S4CWP4;A0A1S3XXN2;A0A1S3ZLJ3	GDSL esterase/lipase At2g38180-like	LOC107823429	32.5	8	27.115			1052200000	989420000	991060000	1.01089e+09	1500500000	1290500000	1291700000	1360900000	0.742812
A0A1S3ZBN1	GDSL esterase/lipase At2g38180-like	LOC107785105	23.9	1	27.321			361920000	306470000	333160000	333850000	374040000	463730000	425960000	4.21243e+08	0.792535
A0A1S4CUF8	GDSL esterase/lipase At5g03980-like	LOC107822594	26.4	1	41.08			34496000	45502000	60889000	4.69623e+07	62085000	45091000	28506000	4.52273e+07	1.03836
A0A1S3YRJ5;A0A1S3YPQ9;A0A1S3YID1;A0A1S4C456	GDSL esterase/lipase At5g03980-like; GDSL esterase/lipase At5g03980-like isoform X1	LOC107778783;LOC107778460	15.5	4	41.441			141300000	149710000	106580000	132530000	166130000	160730000	127240000	1.51367e+08	0.875556
A0A1S3XC04;A0A1S4B2N4;A0A1S4B784;A0A1S3ZCV4;A0A1S3Y8C6;A0A1S4CMP4;A0A1S3X1Q0	GDSL esterase/lipase At5g33370-like	LOC107763465	36.8	12	41.652			660850000	707060000	683570000	6.83827e+08	735880000	679660000	675900000	6.97147e+08	0.980894
A0A1S3YMA4	GDSL esterase/lipase At5g33370-like	LOC107777528	34.1	2	41.48			122280000	172280000	65475000	1.20012e+08	228880000	228930000	329840000	262550000	0.4571
A0A1S4D3M6;A0A1S3ZIH3	GDSL esterase/lipase At5g45670-like	LOC107825649;LOC107787239	13.4	4	40.789			69502000	53788000	64597000	62629000	91992000	75675000	76643000	8.14367e+07	0.769052
A0A1S4BTP1;A0A1S3XKK5	GDSL esterase/lipase At5g45920-like	LOC107811714;LOC107766005	8.1	2	26.171			19400000	21557000	31944000	2.43003e+07	27475000	22048000	33299000	2.76073e+07	0.880213
A0A1S3ZA12	GDSL esterase/lipase At5g45950-like	LOC107784651	7.4	2	40.83			0	0	7545100	2.51503e+06	0	4180400	0	1.39347e+06	1.80488
A0A1S4AVZ1;A0A1S4AY99	GDSL esterase/lipase At5g62930-like; GDSL esterase/lipase At5g62930	LOC107801796;LOC107802525	6.5	1	17.209			17426000	19018000	0	12148000	12975000	15279000	15862000	1.47053e+07	0.826095
A0A1S4ASQ9;A0A1S3YVV2	GDSL esterase/lipase CPRD49-like	LOC107801027;LOC107780246	9.4	2	29.044			9531700	0	13742000	7757900	16112000	14080000	0	10064000	0.770857
A0A1S3YLB2;A0A1S4BWI5;A0A1S3ZR51;A0A1S3YKA9;A0A1S3ZGY2;A0A1S3XGX8	GDSL esterase/lipase LTL1-like	LOC107777269;LOC107812621	28	8	39.641			367160000	353270000	320660000	347030000	400040000	372020000	359310000	3.77123e+08	0.920203
A0A1S3XWS4	GDT1 family protein	LOC107769454	8.7	2	38.315			27331000	30387000	30533000	29417000	37028000	42864000	30584000	3.68253e+07	0.798825
A0A1S3Z0K8	GDT1 family protein	LOC107781467	3.6	1	38.326			24304000	18681000	23185000	2.20567e+07	25237000	24440000	26082000	25253000	0.873428
A0A1S4DRA5;A0A1S4AA00	GEM-like protein 1	LOC107832608;LOC107795310	14.3	4	31.807			130400000	110870000	110440000	1.17237e+08	143610000	146170000	143220000	1.44333e+08	0.812263
Q9ZS34;A0A1S3Z5N4;A0A1S4DJC8;A0A1S4AZJ0;A0A1S3XXZ2	Geranylgeranyl diphosphate reductase, chloroplastic; Geranylgeranyl diphosphate reductase	CHLP;LOC107783257	51.3	20	51.3			3875200000	3489300000	3536500000	3.63367e+09	3109400000	3380700000	3248800000	3246300000	1.11933
D3W9H9	Geranylgeranyl diphosphate synthase	GGPPS2	6.6	1	39.937			10527000	13055000	9796000	11126000	11068000	11861000	10333000	1.10873e+07	1.00349
A0A0H3U3I7;A0A1S3XZF4	Geranylgeranyl pyrophosphate synthase 5; heterodimeric geranylgeranyl pyrophosphate synthase small subunit, chloroplastic-like	LOC107775163	33.4	9	36.391			437790000	453000000	513260000	4.68017e+08	360690000	428100000	420160000	4.02983e+08	1.16138
A0A1S3X709	geranylgeranyl pyrophosphate synthase, chloroplastic-like	LOC107761874	15.8	6	39.511			191850000	205160000	170110000	189040000	199870000	215930000	206000000	2.07267e+08	0.912062
A0A1S3XQ74	geranylgeranyl pyrophosphate synthase, chloroplastic-like	LOC107767573	12.9	1	39.557			3027400	1874900	0	1634100	0	0	0	0	#DIV/0!
A0A1S4AN14;A0A1S3Z922	Germin-like protein	LOC107799261;LOC107784278	27.9	6	21.482			2206500000	2249200000	2175200000	2210300000	2253100000	2102000000	2300000000	2.21837e+09	0.996364
Q7XZV3;A0A1S4BBY9	Germin-like protein	LOC107773727;LOC107806690	34.3	3	21.968			1803000000	2086600000	1871000000	1920200000	1674400000	2034800000	2146300000	1.95183e+09	0.983793
A0A1S3YZQ5	Germin-like protein	LOC107781399	15.9	1	21.567			90488000	81418000	89305000	8.70703e+07	75975000	70634000	47224000	64611000	1.34761
A0A1S3XZB5	Germin-like protein	LOC107770478	15.9	3	21.581			63158000	57669000	62526000	6.11177e+07	65236000	59799000	61224000	6.20863e+07	0.984398
A0A1S4DHC1;A0A1S3YXZ2;A0A1S3XZH9;A0A1S3X616;A0A1S3X813	Germin-like protein	LOC107829814;LOC107780885	16.8	3	23.346			49367000	47561000	48689000	48539000	56793000	54352000	70526000	60557000	0.801542
A0A1S4DE74;A0A1S3YP15	Germin-like protein	LOC107828783;LOC107778274	7	1	24.696			27784000	23939000	19838000	2.38537e+07	17199000	0	16695000	11298000	2.11132
A0A1S3Z3N8;A0A1S4CE80;A0A1S3XU62;A0A1S3X3J4	Germin-like protein	LOC107782663;LOC107818054	5.1	1	24.097	+		0	0	0	0	0	0	0	0	#DIV/0!
A0A076KWF9	Gluaredoxin	LOC107801695	84.3	8	11.248			1009000000	1061900000	972020000	1.01431e+09	1198400000	1002900000	1026600000	1.07597e+09	0.942693
A0A1S4AUB3;A0A1S3YII5	glucan endo-1,3-beta-glucosidase 13-like	LOC107801295;LOC107776461	5.8	2	53.936			27639000	21185000	20120000	2.29813e+07	32767000	18754000	22744000	24755000	0.928351
A0A1S4CE87;A0A1S4AP98	glucan endo-1,3-beta-glucosidase 2-like	LOC107817900;LOC107799671	5.2	1	54.011			0	0	36251000	1.20837e+07	0	43875000	0	14625000	0.826234
A0A1S4C7T3;A0A1S4A7P7	glucan endo-1,3-beta-glucosidase 4; glucan endo-1,3-beta-glucosidase 4-like	LOC107816139;LOC107794662	4.8	2	53.864			26168000	35263000	21452000	2.76277e+07	26270000	34203000	28242000	2.95717e+07	0.934261
A0A1S4B918;A0A1S4BF12	glucan endo-1,3-beta-glucosidase 6-like	LOC107805773	15.2	5	52.739			77270000	69962000	67665000	7.16323e+07	86225000	89808000	87729000	8.79207e+07	0.814738
A0A1S4CQI0;A0A1S4C4C9	glucan endo-1,3-beta-glucosidase 7-like	LOC107821387;LOC107814940	3.9	2	49.605			22165000	14808000	16693000	1.78887e+07	23054000	27419000	21986000	24153000	0.74064
A0A1S4DD92;A0A1S4AFK4	glucan endo-1,3-beta-glucosidase 8-like	LOC107828579;LOC107797100	2.7	1	52.037			8539400	8589200	6122800	7.75047e+06	18447000	0	12963000	10470000	0.740255
P27666;P23546;A0A1S4CWZ4;A0A1S4AT57;P15797;A0A1S4BM35;A0A1S4C3P6	Glucan endo-1,3-beta-glucosidase, basic vacuolar isoform GLB; Glucan endo-1,3-beta-glucosidase, basic vacuolar isoform GGIB50		10	3	40.442			0	21344000	0	7.11467e+06	34511000	26868000	32723000	3.13673e+07	0.226818
A0A1S3Y6A6	Glucosamine 6-phosphate N-acetyltransferase	LOC107772640	13.5	2	17.826			10228000	10294000	10012000	10178000	11691000	13699000	0	8.46333e+06	1.2026
A0A1S4ALJ9;A0A1S3YBU5	Glucose-1-phosphate adenylyltransferase	LOC107798981;LOC107774582	58.5	25	57.308			4978700000	4937800000	4843900000	4.92013e+09	6104500000	5654300000	5666400000	5808400000	0.847072
A0A1S4C9G4;A0A1S4BQH2;A0A1S3YKV8	Glucose-1-phosphate adenylyltransferase	LOC107816541	67.8	30	57.028			4105100000	3780800000	3615900000	3.83393e+09	4409300000	4250700000	4042100000	4.23403e+09	0.905504
A0A1S4BB89	Glucose-1-phosphate adenylyltransferase	LOC107806492	65.8	4	57.191			246750000	228760000	250090000	2.41867e+08	297280000	260450000	250480000	2.69403e+08	0.897786
A0A1S4D6R7;A0A1S3X9E2	Glucose-1-phosphate adenylyltransferase	LOC107826565;LOC107762694	12.3	5	58.366			31789000	26244000	31958000	29997000	31358000	31549000	30614000	3.11737e+07	0.962254
A0A1S3WX25;A0A1S4DMZ3	Glucose-6-phosphate 1-dehydrogenase	LOC107758909;LOC107831534	18.2	9	58.415			123430000	124720000	132920000	1.27023e+08	134450000	125140000	123310000	1.27633e+08	0.995221
A0A1S4CS04;A0A1S4A8N1;Q43793;A0A1S3ZF58;A0A1S4DEP9	Glucose-6-phosphate 1-dehydrogenase	LOC107822069;LOC107794892	5.3	3	66.69			40821000	44385000	44632000	4.32793e+07	23429000	18855000	31572000	2.46187e+07	1.75799
A0A1S4A0T5;A0A1S3ZEI2	Glucose-6-phosphate 1-epimerase	LOC107792473;LOC107785825	50	14	33.354			2310800000	2277500000	2038400000	2208900000	2392700000	2269900000	2192900000	2.28517e+09	0.966625
A0A1S4C4Q9;A0A1S3Y0L7	Glucose-6-phosphate 1-epimerase	LOC107815055;LOC107770947	35.4	9	35.54			103450000	117010000	121970000	1.14143e+08	145320000	128370000	129690000	134460000	0.848902
A0A1S4B6G0;A0A1S4AUK5	Glucose-6-phosphate 1-epimerase	LOC107805071;LOC107801442	4.6	1	34.794			20601000	22310000	16976000	1.99623e+07	29641000	23063000	25485000	26063000	0.765926
A0A1S3XGW1;A0A1S3YLH9	Glucose-6-phosphate 1-epimerase	LOC107765053;LOC107777417	13.2	2	33.436			0	0	0	0	0	0	10502000	3.50067e+06	0
A0A1S4CI25	Glucose-6-phosphate isomerase	LOC107819267	62.1	27	67.504			1531500000	1663200000	1497300000	1564000000	1827000000	1669100000	1831800000	1.77597e+09	0.880647
A0A1S4D4C8	Glucose-6-phosphate isomerase	LOC107825825	20.1	10	62.816			245040000	240720000	250750000	2.45503e+08	172280000	204690000	225850000	200940000	1.22177
A0A1S4BT89	Glucose-6-phosphate isomerase	LOC107811651	16.3	1	63.688			30584000	23148000	37200000	3.03107e+07	23448000	20693000	24392000	2.28443e+07	1.32684
A0A1S3ZP30	Glucose-6-phosphate isomerase	LOC107788918	55.4	1	68.528			21718000	16033000	13496000	1.70823e+07	16763000	17196000	0	1.13197e+07	1.50908
A0A1S4CQ30;A0A1S3YLM5	glucose-induced degradation protein 8 homolog isoform X1; glucose-induced degradation protein 8 homolog	LOC107821253;LO	5.3	1	27.544			0	0	0	0	0	0	0	0	#DIV/0!
A0A1S3ZXN7;A0A1S4AJT2	glucuronokinase 1-like isoform X1	LOC107791536	11.1	3	32.009			17475000	16142000	0	1.12057e+07	0	14085000	0	4695000	2.38672
A0A1S4AIS8;A0A1S4B6G7;A0A1S4CIL0;A0A1S4A652;A0A1S4C4T0;A0A1S4AI09;A0A1S3ZR94;A0A1S3Z6D1	Glutamate decarboxylase	LOC107798147	33.1	14	55.932			1458800000	1351600000	1494000000	1434800000	1551800000	1642900000	1762700000	1.65247e+09	0.868278
A0A1S4BL86	Glutamate decarboxylase	LOC107809522	30.6	1	55.951	+		0	0	0	0	0	32577000	46019000	2.61987e+07	0
A0A1S4B8W9;A0A1S4AMP7	Glutamate dehydrogenase	LOC107805677;LOC107799349	27.5	8	44.502			231740000	234120000	211690000	225850000	247300000	258240000	245400000	2.50313e+08	0.902269
A0A1S3XS81	glutamate synthase [NADH], amyloplastic-like	LOC107767943	6.2	4	92.452			58937000	54518000	61515000	5.83233e+07	50259000	58257000	60812000	5.64427e+07	1.03332
A0A1S4CUQ3;A0A1S4BK01	glutamate synthase 1 [NADH], chloroplastic-like; LOW QUALITY PROTEIN: glutamate synthase 1 [NADH], chloroplastic-like	LOC107822887	5.4	6	141.55			59757000	72106000	65874000	6.59123e+07	61816000	59819000	59674000	6.04363e+07	1.09061
Q8L7Z8;A0A1S4CJL5	Glutamate/malate translocator; dicarboxylate transporter 2.1, chloroplastic-like	DiT2;LOC107819756	9.6	4	62.138			86712000	88514000	115280000	9.68353e+07	11712000	12514000	102870000	4.23653e+07	2.28572
A0A1S3XXN7	Glutamate-1-semialdehyde 2,1-aminomutase	LOC107769957	66.1	6	35.521			1013000000	643660000	917360000	8.58007e+08	740890000	625520000	723240000	696550000	1.23179
A0A1S4D6G2;P31593;A0A1S4C4F5;A0A1S4DC39	Glutamate-1-semialdehyde 2,1-aminomutase; Glutamate-1-semialdehyde 2,1-aminomutase, chloroplastic	LOC107826543;GSA	41.6	17	50.969			3795100000	3986600000	3570700000	3.78413e+09	3141500000	3327700000	3746900000	3.40537e+09	1.11123
Q1W2L8	Glutamate--cysteine ligase, chloroplastic	GSH1	16.1	7	58.961			149850000	189070000	217990000	1.85637e+08	147680000	198180000	156370000	167410000	1.10887
A0A1S3Z8M2	Glutamate--cysteine ligase, chloroplastic	LOC107784172	16.1	1	59.186			42934000	33013000	0	2.53157e+07	50420000	0	0	1.68067e+07	1.50629
A0A1S4DHA4;A0A1S3Y052	Glutamate--tRNA ligase	LOC107829795;LOC107770544	12.3	7	84.048			113430000	90420000	81110000	9.49867e+07	93421000	85624000	70016000	8.30203e+07	1.14414
Q43794;A0A1S3ZA01;A0A1S3YD67	Glutamate--tRNA ligase, chloroplastic/mitochondrial; Glutamate--tRNA ligase	LOC107784556	19.7	9	63.338			386210000	456440000	407030000	416560000	231690000	343420000	259180000	2.78097e+08	1.4979
Q6QND2;A0A1S3YVS9	Glutaminase	Pdx2;LOC107780413	16.7	3	27.161			53664000	72368000	52475000	5.95023e+07	45419000	26264000	43205000	38296000	1.55375
A0A1S4AWH0	Glutamine synthetase	LOC107802035	62.5	30	47.512			32045000000	30098000000	29406000000	3.05163e+10	30668000000	35756000000	35640000000	3.40213e+10	0.896976
A0A1S3XKM0	Glutamine synthetase	LOC107766022	62.5	2	47.526			2240500000	2150700000	2049100000	2.14677e+09	2132900000	2508700000	2501900000	2.38117e+09	0.901561
A0A1S3YNC4;A0A1S4BD09;A0A1S4A3P9;A0A1S4D9D3;A0A1S3WZY7	Glutamine synthetase	LOC107777858;LOC107807051	24.2	3	38.888			935600000	855630000	930250000	907160000	91869000	129370000	116000000	112413000	8.06989
A0A1S3ZPN7;A0A1S3YNR3;A0A1S4D3N8;A0A1S3YGA9	Glutamine synthetase	LOC107789070	28.1	5	39.179			77820000	90916000	65043000	7.79263e+07	59875000	95705000	81919000	7.91663e+07	0.984337
A0A1S4B7X7;A0A1S4DC58;A0A1S4B7N3	glutamine-dependent NAD(+) synthetase-like; Glutamine-dependent NAD(+) synthetase	LOC107805443;LOC107828249	16.2	1	16.319			17868000	15796000	17647000	1.71037e+07	0	0	0	0	#DIV/0!
A0A1S3YF68;A0A1S3ZVZ9	Glutamine--tRNA ligase; glutamine--tRNA ligase-like	LOC107775454;LOC107791030	5.9	4	90.554			37219000	30181000	35527000	34309000	26865000	35410000	28631000	30302000	1.13224
A0A1S4CZK0	glutaminyl-peptide cyclotransferase-like	LOC107824318	4.8	1	32.823			0	0	0	0	0	0	4751900	1.58397e+06	0
A0A1S3XBH0;A0A1S4CZ46;A0A1S4A4S1	Glutamyl-tRNA reductase	LOC107763283	12.5	6	59.357			129120000	121240000	121210000	1.23857e+08	89218000	142250000	110440000	1.13969e+08	1.08675
E9N733;E9N732	Glutamyl-tRNA reductase binding protein	GluTRBP2;GluTRBP1	26.6	6	36.437			198750000	147630000	146900000	1.64427e+08	165850000	167020000	160890000	1.64587e+08	0.999028
A0A1S4AME8	Glutamyl-tRNA(Gln) amidotransferase subunit A, chloroplastic/mitochondrial	LOC107799243	10.6	3	43.931			63010000	82248000	64588000	6.99487e+07	59463000	61942000	61855000	6.10867e+07	1.14507
A0A1S3XDG5;A0A1S3XCG1	glutamyl-tRNA(Gln) amidotransferase subunit A, chloroplastic/mitochondrial-like	LOC107763882	13.8	2	29.81			16435000	14612000	12719000	1.45887e+07	15130000	15582000	14221000	1.49777e+07	0.974028
A0A1S4AD65;A0A1S4BCN1;A0A1S3XTW9;A0A1S4BK49	Glutamyl-tRNA(Gln) amidotransferase subunit B, chloroplastic/mitochondrial	LOC107796312	17.5	8	60.726			278520000	385960000	246160000	3.03547e+08	230860000	209120000	224390000	2.21457e+08	1.37068
A0A1S4CUX2	glutaredoxin	LOC107822846	78.7	1	11.262			143650000	139060000	155380000	146030000	160390000	191300000	180210000	177300000	0.823632
A0A1S3Z8R6;A0A1S3YX82	glutaredoxin-C4-like	LOC107784219;LOC107780843	28.9	4	14.779			101660000	83915000	90211000	9.19287e+07	94517000	109470000	102970000	102319000	0.898452
A0A1S4CGG7	glutaredoxin-C5, chloroplastic-like isoform X1	LOC107818547	40	1	20.063			87527000	83156000	71738000	80807000	89187000	73004000	97181000	8.64573e+07	0.934646
A0A1S4BCB4;A0A1S4CX06	Glutaredoxin-dependent peroxiredoxin	LOC107806837;LOC107823523	49.1	10	24.311			1983300000	2007500000	2127800000	2.03953e+09	2043700000	2067100000	2046100000	2052300000	0.993779
A0A1S4DK72	Glutaredoxin-dependent peroxiredoxin	LOC107830577	63.6	7	17.44			752950000	662360000	762810000	726040000	923680000	730860000	814700000	823080000	0.882101
A0A1S3ZFS3	Glutaredoxin-dependent peroxiredoxin	LOC107786362	39.9	7	20.89			599730000	605870000	639560000	6.15053e+08	778180000	596530000	743300000	7.06003e+08	0.871176
A0A1S3ZZI4	Glutaredoxin-dependent peroxiredoxin	LOC107792077	37.7	8	24.92			323190000	312490000	333550000	3.23077e+08	334340000	352140000	309700000	332060000	0.972947
A0A1S3XDP9	Glutaredoxin-dependent peroxiredoxin	LOC107763907	68.2	1	9.4989			164500000	148670000	143420000	1.52197e+08	219880000	174490000	141660000	1.78677e+08	0.851799
A0A1S4AWU1	Glutaredoxin-dependent peroxiredoxin	LOC107802071	39.9	1	20.932			54070000	55870000	58390000	56110000	106700000	64149000	71328000	8.07257e+07	0.69507
A0A1S4D678	Glutaredoxin-dependent peroxiredoxin	LOC107826335	33.2	1	24.764			0	124770000	0	41590000	191630000	176590000	122340000	163520000	0.254342
A0A1S3X6Y4;A0A1S3XTR7	Glutaredoxin-dependent peroxiredoxin; Thioredoxin-dependent peroxiredoxin	LOC107761969;LOC107768657	20.9	3	28.236			57744000	57837000	35230000	5.02703e+07	82407000	68801000	87064000	79424000	0.632936
A0A1S4C1R4;A0A1S4B656	glutaredoxin-like	LOC107814238;LOC107804854	25.6	2	13.57			0	0	0	0	0	0	0	0	#DIV/0!
A0A1S4AHS5	Glutaredoxin-like protein	LOC107797753	6.5	1	18.839			13061000	17461000	15820000	1.54473e+07	18659000	19195000	17344000	1.83993e+07	0.839559
A0A1S4A969;A0A1S3XD62	Glutathione peroxidase	LOC107795121;LOC107763885	41	10	25.793			756930000	751920000	742610000	7.50487e+08	1273200000	1023200000	903040000	1066480000	0.703704
A0A1S4BWI9;A0A1S4BUC3	Glutathione peroxidase	LOC107812623;LOC107811982	18.8	3	18.887			181680000	159290000	149990000	1.63653e+08	164040000	235440000	139890000	179790000	0.910247
A0A1S3YB42	Glutathione peroxidase	LOC107774241	30.5	6	22.83			212050000	211110000	203430000	2.08863e+08	304280000	267520000	242780000	2.71527e+08	0.769218
A0A1S4D7I2;A0A1S4BJS6	Glutathione peroxidase	LOC107826748;LOC107809063	9.4	1	19.124			32099000	29601000	29427000	3.03757e+07	43835000	41918000	35238000	4.03303e+07	0.753172
A0A1S3YT69	Glutathione peroxidase	LOC107779288	26.9	1	22.45			41725000	41216000	41622000	41521000	61672000	57098000	56810000	5.85267e+07	0.709437
A0A1S3YKW2;A0A1S3YKT8	Glutathione reductase	LOC107777121;LOC107777100	25.2	11	54.526			445140000	438540000	414760000	4.32813e+08	566900000	500270000	486750000	5.17973e+08	0.83559
P80461;A0A1S3XRR2	Glutathione reductase, chloroplastic (Fragment); glutathione reductase, chloroplastic-like	GOR;LOC107767974	45.1	3	60.035			86624000	79024000	93850000	8.64993e+07	54245000	98213000	111910000	8.81227e+07	0.981579
A0A1S4CD72	glutathione reductase, chloroplastic isoform X1	LOC107817696	42.7	20	63.65			1382700000	1448000000	1458400000	1429700000	1744500000	1562700000	1516100000	1.60777e+09	0.889246
A0A1S4CJW2	glutathione S-transferase DHAR2-like	LOC107819842	69.3	15	23.632			905010000	834370000	724530000	8.21303e+08	970340000	927460000	918390000	938730000	0.874909
A0A1S3YL98	glutathione S-transferase DHAR2-like	LOC107777254	64.6	3	23.65			66145000	42058000	45786000	5.13297e+07	49885000	43954000	41658000	4.51657e+07	1.13648
A0A1S3Y8V8	glutathione S-transferase DHAR3, chloroplastic	LOC107773610	49.2	12	33.959			1700100000	1599300000	1552500000	1617300000	2174300000	1817900000	1863300000	1.95183e+09	0.828606
A0A1S3X0J2;A0A1S3XD39	glutathione S-transferase L3-like isoform X1	LOC107759987	45.5	10	27.133			323490000	304870000	284990000	304450000	402290000	365510000	370360000	3.79387e+08	0.802479
A0A1S3XZP3	glutathione S-transferase L3-like isoform X1	LOC107770509	27.7	2	27.267			53499000	77234000	51104000	6.06123e+07	84255000	83203000	89073000	8.55103e+07	0.708831
A0A1S4CJX9	glutathione S-transferase T1-like	LOC107819594	36.4	8	26.533			216950000	258620000	250420000	2.41997e+08	279590000	286050000	338250000	3.01297e+08	0.803184
A0A1S4A502;A0A1S3Z880;A0A1S3XDD6	glutathione S-transferase T1-like	LOC107793760;LOC107784129	18	3	28.565			34717000	40586000	42207000	39170000	28591000	42409000	37775000	3.62583e+07	1.0803
A0A1S4AC68	glutathione S-transferase T1-like	LOC107796058	32.6	1	26.487	+		18220000	16200000	18128000	17516000	19226000	21455000	20123000	20268000	0.864219
A0A077D837;A0A1S3YPR8;A0A1S4CQB1	Glutathione synthetase; glutathione synthetase, chloroplastic-like	LOC107832748;LOC107778469	4.3	2	61.806			13328000	17822000	18681000	1.66103e+07	18781000	0	15543000	1.14413e+07	1.45178
A0A1S4A868	Glutathione transferase	LOC107794811	60.1	13	23.924			3691200000	3702100000	3791900000	3728400000	4596300000	4110200000	3752700000	4.15307e+09	0.897746
A0A1S3YUL8	Glutathione transferase	LOC107779739	48	11	25.134			3041700000	3262500000	3240500000	3.18157e+09	3650800000	3383700000	3228800000	3421100000	0.929984
A0A1S3Z4W9	Glutathione transferase	LOC107782952	49.3	13	25.497			683490000	689110000	635620000	6.69407e+08	778510000	756430000	714200000	7.49713e+08	0.892884
A0A1S3XWK1	Glutathione transferase	LOC107769388	25.2	4	25.431			213370000	237650000	123820000	1.91613e+08	322570000	164880000	274040000	253830000	0.754888
A0A1S4C1Y2	Glutathione transferase	LOC107814292	46.6	3	25.392			120030000	118650000	123130000	1.20603e+08	131230000	162550000	131350000	141710000	0.851057
A0A1S4BDE5;A0A1S3YSP4;A0A1S3Y5I1;P25317;A0A1S3X0Y0	Glutathione transferase	LOC107807101	41.1	4	25.571			100420000	105660000	106770000	1.04283e+08	126070000	126960000	120350000	124460000	0.837886
A0A1S4CS55;A0A1S3YMK4	Glutathione transferase	LOC107821964;LOC107777621	14.3	3	25.896			47349000	39516000	47465000	4.47767e+07	52280000	54948000	44445000	5.05577e+07	0.885655
A0A1S4BT19;A0A1S4DBX2	Glutathione transferase	LOC107811585;LOC107828152	9.9	2	25.358			44025000	45448000	43696000	4.43897e+07	40728000	37320000	41861000	3.99697e+07	1.11058
A0A1S4CLX7;A0A1S3YRZ9	Glutathione transferase	LOC107820298;LOC107779135	17.2	4	25.514			50481000	69825000	44176000	5.48273e+07	41299000	54716000	58128000	51381000	1.06707
A0A1S4DMF4	Glutathione transferase	LOC107831351	43.9	2	25.258			65167000	53676000	63382000	6.07417e+07	64052000	73649000	62715000	6.68053e+07	0.909234
A0A1S3Y546	Glutathione transferase	LOC107772392	30.1	1	25.433			15427000	14046000	14072000	14515000	24629000	0	17694000	1.41077e+07	1.02887
A0A1S4CYD1;Q03666;A0A1S3Z4S2;P49332	Glutathione transferase; Probable glutathione S-transferase	LOC107823949	25.3	6	25.713			279790000	309030000	307720000	2.98847e+08	360030000	320520000	314160000	331570000	0.901308
A0A1S3WZM7;A0A1S4DC59	glutathionyl-hydroquinone reductase YqjG-like isoform X1	LOC107759698	7	2	41.039			0	0	0	0	0	0	10500000	3500000	0
A0A1S3ZEE9;A0A1S4BBK3	glutelin type-B 2-like	LOC107785940;LOC107806600	13.8	5	43.615			71755000	68090000	48799000	6.28813e+07	41290000	67411000	72141000	6.02807e+07	1.04314
A0A1S3YLA5	Glyceraldehyde-3-phosphate dehydrogenase	LOC107777241	52.9	16	42.723			23767000000	24552000000	23847000000	2.40553e+10	19998000000	23185000000	23692000000	2.22917e+10	1.07912
A0A1S4CNK0;A0A1S4ATB8;P09044	Glyceraldehyde-3-phosphate dehydrogenase	LOC107820790;LOC107801158	56.3	30	47.782			19360000000	21521000000	19931000000	2.02707e+10	18659000000	20123000000	21105000000	1.99623e+10	1.01545
A0A1S4BYQ0	Glyceraldehyde-3-phosphate dehydrogenase	LOC107813294	67.4	9	36.637			3988500000	3502800000	3977400000	3822900000	3565300000	3820800000	3743800000	3.70997e+09	1.03044
A0A1S3XP71	Glyceraldehyde-3-phosphate dehydrogenase	LOC107767301	50.6	12	47.922			5461000000	5023300000	5183500000	5222600000	4859200000	5543000000	5124100000	5.17543e+09	1.00911
A0A1S4AE99	Glyceraldehyde-3-phosphate dehydrogenase	LOC107796678	50.6	3	47.873			659760000	516890000	777310000	651320000	678030000	736770000	791530000	7.35443e+08	0.885615
A0A1S3XFT6	Glyceraldehyde-3-phosphate dehydrogenase	LOC107764636	67.4	1	36.651			184550000	179500000	211140000	191730000	167640000	220380000	158720000	1.82247e+08	1.05204
A0A0K2GN10	Glyceraldehyde-3-phosphate dehydrogenase	GAPC1	49	4	36.702			133120000	168820000	165040000	155660000	134510000	157910000	164280000	1.52233e+08	1.02251
A0A1S4DA75;A0A1S3ZUS3	Glyceraldehyde-3-phosphate dehydrogenase	LOC107827613;LOC107790641	18.9	3	44.614			23450000	0	30898000	18116000	0	24732000	18414000	14382000	1.25963
A0A1S3YV19;P09043	Glyceraldehyde-3-phosphate dehydrogenase; Glyceraldehyde-3-phosphate dehydrogenase A, chloroplastic (Fragment)	LOC107780142;GAPA	52.9	2	42.669			832700000	918780000	1019600000	9.23693e+08	740350000	848060000	874420000	8.20943e+08	1.12516
A0A1S4DBQ6;P09094;A0A1S4BRR2;A0A1S3YHB5	Glyceraldehyde-3-phosphate dehydrogenase; Glyceraldehyde-3-phosphate dehydrogenase, cytosolic (Fragment)	LOC107828122;GAPC	65.6	21	37.007			12626000000	12919000000	12698000000	1.27477e+10	10656000000	12315000000	12079000000	1.16833e+10	1.0911
A0A1S3XJF2	glycerate dehydrogenase	LOC107765918	89.4	29	42.324			13515000000	13590000000	13949000000	1.36847e+10	15144000000	15308000000	15055000000	15169000000	0.902147
A0A1S4B7M2	glycerate dehydrogenase	LOC107805344	89.4	1	42.295			37936000	53505000	64181000	51874000	114040000	46592000	60589000	7.37403e+07	0.703468
A0A1S4DPD1	Glycerol kinase	LOC107831988	8.4	3	56.576			32965000	26532000	30377000	29958000	24997000	22012000	26606000	2.45383e+07	1.22087
A0A1S3ZI99;A0A1S4D9T1	glycerol-3-phosphate 2-O-acyltransferase 4-like	LOC107787089;LOC107827	4.8	2	53.511			57295000	50183000	48598000	5.20253e+07	37001000	32112000	57277000	42130000	1.23488
A0A1S3XU98;A0A1S4BDV3	Glycerol-3-phosphate acyltransferase, chloroplastic	LOC107768804	32.2	12	52.071			490660000	510720000	508830000	5.03403e+08	425630000	431810000	486950000	448130000	1.12334
A0A1S4AEC1	Glycerol-3-phosphate acyltransferase, chloroplastic	LOC107796734	22.7	2	51.19			0	0	104470000	3.48233e+07	90086000	109890000	52330000	84102000	0.414061
Q2WGN6;A0A1S4D9B7	Glycerophosphodiester phosphodiesterase	NtGPDL	25.8	14	82.004			798380000	734400000	787110000	7.73297e+08	1139900000	962910000	933290000	1.01203e+09	0.764102
A0A1S3YN86	Glycerophosphodiester phosphodiesterase	LOC107778062	23.7	4	82.116			106430000	88994000	103540000	9.96547e+07	135880000	131300000	119190000	128790000	0.773776
A0A1S3ZWA1;A0A1S4D7X9	Glycerophosphodiester phosphodiesterase	LOC107791195;LOC107826889	4.3	1	45.692			24328000	0	28751000	17693000	31293000	0	0	10431000	1.69619
A0A1S4CLA2	Glycine cleavage system H protein	LOC107820179	46.3	6	17.586			6545200000	6634300000	6785400000	6.65497e+09	7368600000	7875800000	7709600000	7.65133e+09	0.869779
A0A1S3YRT4;A0A1S4B7D0;A0A1S3Y697	Glycine cleavage system H protein	LOC107778948;LOC107805221	46.9	1	17.399			819620000	946960000	819230000	8.61937e+08	1807800000	1785200000	1254000000	1.61567e+09	0.533487
A0A1S3Z4R3	Glycine cleavage system P protein	LOC107783010	68.5	60	114.21			28531000000	28004000000	28077000000	28204000000	31090000000	31964000000	31153000000	3.14023e+10	0.89815
A0A1S3YYG2	Glycine cleavage system P protein	LOC107781010	66.9	9	113.85			2287900000	2341900000	2242300000	2290700000	2138000000	2474300000	2848500000	2.48693e+09	0.921094
A0A1S4DQ97	glycine-rich protein 2-like	LOC107832297	34.4	3	17.038			74460000	61342000	73557000	6.97863e+07	102830000	70011000	96297000	8.97127e+07	0.777887
A0A1S4BNE9	glycine-rich protein 2-like	LOC107810166	40.9	2	15.129			11281000	0	0	3.76033e+06	15058000	0	0	5.01933e+06	0.74917
A0A1S4C953;A0A1S4DS18	glycine-rich protein 2-like; glycine-rich protein 2	LOC107816435;LOC107832840	35.2	4	20.277			319420000	282100000	268660000	290060000	374550000	292910000	329190000	3.32217e+08	0.873105
A0A1S4AQU2	glycine-rich RNA-binding protein 2, mitochondrial-like	LOC107800467	41.7	4	15.161			411370000	403890000	443480000	419580000	449890000	439390000	463000000	450760000	0.930828
A0A1S4D3E1;A0A1S3Y669	glycine-rich RNA-binding protein 2, mitochondrial-like	LOC107825574	25	2	8.5882			334100000	272690000	240240000	2.82343e+08	160090000	239500000	308110000	235900000	1.19688
A0A1S4DES4;A0A1S4AFM9	glycine-rich RNA-binding protein 2, mitochondrial-like	LOC107829053	25.3	5	27.867			344910000	363830000	374190000	3.60977e+08	404090000	397810000	356960000	3.86287e+08	0.934479
A0A1S3XBV6;A0A1S3ZI52	glycine-rich RNA-binding protein 2, mitochondrial-like; glycine-rich RNA-binding protein 3, mitochondrial-like	LOC107763441	10.5	2	27.388			43435000	25027000	20996000	2.98193e+07	45657000	53118000	36805000	4.51933e+07	0.659817
A0A1S4D9S8	glycine-rich RNA-binding protein 3, mitochondrial-like	LOC107827529	13	2	16.474			47762000	54109000	55740000	52537000	48134000	0	51113000	3.30823e+07	1.58807
A0A1S4CRD6	glycine-rich RNA-binding protein 4, mitochondrial-like	LOC107821702	6.2	1	18.129			0	7008400	0	2.33613e+06	0	9784800	8172100	5.98563e+06	0.39029
A0A1S4A939	glycine-rich RNA-binding protein-like	LOC107795042	69.4	7	15.583			727210000	700460000	706240000	7.11303e+08	695250000	639350000	672210000	6.68937e+08	1.06333
A0A1S3ZAU1;A0A1S4DPJ9	glycine-rich RNA-binding protein-like	LOC107784861	83	9	16.745			557400000	565960000	536010000	5.53123e+08	546410000	550090000	598370000	5.64957e+08	0.979054
A0A1S4CHM7	glycine-rich RNA-binding protein-like	LOC107818947	62.8	6	14.754			322490000	343000000	328610000	3.31367e+08	383990000	347690000	380090000	370590000	0.89416
A0A1S4CYX6;A0A1S4BAZ0;A0A1S3ZCH7	glycine-rich RNA-binding protein-like	LOC107823997;LOC107806404	42.6	1	11.7			44844000	61957000	53820000	5.35403e+07	50796000	52287000	66452000	5.65117e+07	0.947421
A0A1S4CH81	glycine-rich RNA-binding protein-like	LOC107818946	33.1	1	17.066			0	8354400	8131200	5495200	0	8493000	0	2831000	1.94108
A0A1S3X0T3	glycine-rich RNA-binding protein-like isoform X1	LOC107760024	48.1	2	18.404			45728000	0	0	1.52427e+07	57850000	54782000	0	37544000	0.405995
A0A1S4BRE2;A0A1S4BZX6	Glycine--tRNA ligase	LOC107811104	16.6	14	123.3			324890000	310350000	312770000	3.16003e+08	236830000	295330000	285910000	272690000	1.15884
A0A1S4DI23	Glycine--tRNA ligase	LOC107830076	17.2	3	91.768			28827000	21069000	0	16632000	15625000	18755000	21560000	1.86467e+07	0.891956
A0A1S4CUV9;A0A1S3Y6R7;A0A1S3XGG5	Glycine--tRNA ligase; glycine--tRNA ligase, mitochondrial 1-like	LOC107822727;LOC107772883	28	10	70.305			310690000	410830000	345250000	355590000	300750000	377070000	364550000	3.47457e+08	1.02341
A0A1S3XEZ0;A0A1S3X5K8	glycolipid transfer protein 1-like	LOC107764384;LOC107761496	12.4	2	22.319			32671000	49132000	52568000	4.47903e+07	56332000	40660000	54812000	5.06013e+07	0.885161
A0A1S4DG23;A0A1S4ACF5;A0A1S4A7J1;A0A1S4BLN6;A0A1S4BU92	Glycosyltransferase	LOC107829337;LOC107796079	27.8	11	50.474			460140000	500880000	471410000	4.77477e+08	456920000	411360000	406430000	4.24903e+08	1.12373
A0A1S4ALG3	Glycosyltransferase	LOC107798762	21.6	8	54.051			198500000	240450000	203160000	2.14037e+08	202790000	187910000	186530000	192410000	1.1124
A0A1S3YIS4	Glycosyltransferase	LOC107776603	9.1	3	52.044			139470000	165780000	137240000	1.47497e+08	101210000	122970000	138490000	120890000	1.22009
A0A1S3XC79	Glycosyltransferase	LOC107763568	5	2	52.215			47160000	36616000	38353000	4.07097e+07	35189000	39743000	44561000	39831000	1.02206
Q589Y2;Q589Y1	Glycosyltransferase	NtGT5a;NtGT5b	4.1	2	54.212			29267000	34390000	33430000	3.23623e+07	31391000	30677000	24386000	28818000	1.12299
A0A1S3ZH41	Glycosyltransferase	LOC107786771	6.9	3	51.611			22787000	0	22471000	15086000	20416000	26648000	37278000	28114000	0.536601
A0A1S4CAW5	Glycosyltransferase	LOC107816869	2.1	1	57.449			13898000	9467900	7756200	1.0374e+07	0	3825200	11280000	5.03507e+06	2.06036
A0A1S4B1B8;A0A1S4D7C0	Glycosyltransferase	LOC107803440;LOC107826729	6.6	2	47.881			16975000	12117000	14333000	14475000	0	12287000	0	4.09567e+06	3.53422
A0A1S3Z9T9	Glycosyltransferase	LOC107784554	2.5	1	53.477			6972600	5131100	7477600	6527100	6465800	5557100	0	4.00763e+06	1.62867
A0A1S4C5L0;A0A1S3ZRF6	Glycosyltransferase	LOC107815432;LOC107789625	2.3	1	54.22			7201200	0	0	2400400	0	0	0	0	#DIV/0!
P93364	Glycosyltransferase	IS10a	5.7	2	53.454			6288000	0	0	2096000	0	0	0	0	#DIV/0!
A0A1S3ZVV9	Glycosyltransferase	LOC107790993	4.7	2	52.996			0	8731800	13121000	7.28427e+06	12662000	8902600	0	7188200	1.01336
A0A1S4CAD9	Glycosyltransferase	LOC107816870	18.7	1	53.936			0	0	0	0	0	0	0	0	#DIV/0!
A0A1S4DA24;A0A1S4CR02;A0A1S4B730;A0A1S4B565	Glycylpeptide N-tetradecanoyltransferase	LOC107827426;LOC107821769	2.5	1	49.566			23931000	24337000	28877000	25715000	27753000	25530000	30937000	2.80733e+07	0.915994
A0A1S4AB88;A0A1S3YLJ1;A0A1S4ARC1	glyoxylate/succinic semialdehyde reductase 1-like	LOC107795700;LOC10	34.9	9	30.812			338300000	330970000	349350000	339540000	326520000	361060000	350430000	3.46003e+08	0.98132
A0A1S3Z6N1;A0A1S3YPJ3	glyoxylate/succinic semialdehyde reductase 2, chloroplastic-like	LOC107783419	14.1	3	39.701			67398000	81231000	0	49543000	61754000	0	85707000	4.91537e+07	1.00792
A0A1S4D040;A0A1S4D439;A0A1S3XKP7	glyoxysomal fatty acid beta-oxidation multifunctional protein MFP-a-like	LOC107824491	12.3	6	63.059			165590000	153930000	136030000	151850000	112140000	125780000	145020000	1.27647e+08	1.18961
A0A1S4DK16	golgin candidate 5-like	LOC107830632	1.8	1	118.87			0	0	15324000	5108000	14057000	15687000	0	9.91467e+06	0.515196
A0A1S4BC75	golgin candidate 6-like	LOC107806804	1.9	1	101.02			8270500	5988600	13173000	9.14403e+06	0	5740300	0	1.91343e+06	4.77886
A0A1S4D9I7;A0A1S3ZIL2	GPI inositol-deacylase; uncharacterized protein LOC107787279	LOC107827413;LOC107787279	6.5	2	34.687			42402000	41782000	48156000	4.41133e+07	47259000	36278000	42462000	4.19997e+07	1.05033
A0A1S4BVY0	GrpE protein homolog	LOC107812441	44.4	5	39.201			235060000	237220000	197430000	2.23237e+08	311220000	259610000	218960000	2.63263e+08	0.84796
A0A1S3XKA7	GrpE protein homolog	LOC107766184	34	7	34.262			192040000	136490000	177270000	168600000	150210000	150590000	185500000	162100000	1.0401
A0A1S3X5I4;Q9ZSP4;A0A1S4DB61;A0A1S3X0Q3	GrpE protein homolog	LOC107761529;GrpE1	17.8	5	33.295			83552000	86567000	95247000	8.84553e+07	106350000	98048000	83279000	9.58923e+07	0.922444
A0A1S3XJ11	GrpE protein homolog	LOC107765781	22.8	1	35.913			57891000	46497000	46056000	50148000	0	0	0	0	#DIV/0!
A0A1S4AXG2;A0A1S4B817	GrpE protein homolog; protein GrpE-like	LOC107802356;LOC107805474	42.9	19	39.036			2181200000	2031100000	1962300000	2058200000	2322700000	2405200000	2325400000	2351100000	0.87542
A0A1S4BK34	GTP cyclohydrolase II	LOC107809151	20.8	6	44.416			160010000	130600000	165060000	151890000	196050000	159260000	182490000	1.79267e+08	0.847285
A0A1S4DM93;A0A1S4A1I3	GTP cyclohydrolase II	LOC107831087;LOC107792734	9.3	4	57.43			51038000	50192000	54036000	5.17553e+07	81412000	60167000	64841000	6.88067e+07	0.752185
A0A1S3ZRV5	GTP cyclohydrolase II	LOC107789772	12.8	1	59.292			21289000	31450000	35071000	29270000	27480000	32303000	25910000	2.85643e+07	1.0247
A0A1S3ZRE1;A0A1S3YUU8	GTP cyclohydrolase II	LOC107789601;LOC107780053	2.2	1	59.947			0	7263700	6613900	4.62587e+06	14294000	8644800	14566000	12501600	0.370022
A0A1S4D902;A0A1S4AYZ1	GTPase Der	LOC107827276;LOC107802742	3.8	2	71.996			0	12813000	14268000	9027000	13727000	11375000	14287000	1.31297e+07	0.687527
P41918	GTP-binding nuclear protein Ran-A1	RAN-A1	40.3	1	25.018			64853000	62876000	66287000	64672000	68075000	60285000	74849000	6.77363e+07	0.954761
P41919;A0A1S3ZIC2;A0A1S3YU28	GTP-binding nuclear protein Ran-B1; GTP-binding nuclear protein	RAN-B1;LOC107787005	40.3	8	25.171			1053000000	990240000	976640000	1.00663e+09	903260000	845630000	981290000	910060000	1.10611
A0A1S3ZTZ5;A0A1S4CGU1;A0A1S4BB77;Q9SDQ5;P52885	GTP-binding protein SAR1A-like; GTP-binding protein SAR2-like	LOC107790375;LOC107818801	47.7	1	21.962			42052000	81117000	55251000	5.94733e+07	0	47523000	30629000	2.60507e+07	2.28299
O24138;A0A1S4AVH1	GTP-binding protein SAR1B-like; GTP-binding protein SAR1A	NtSAR1;LOC107801718	59.6	10	21.922			749350000	774220000	764510000	7.62693e+08	475550000	676090000	569700000	573780000	1.32924
A0A1S4C4L0;A0A1S4B8J4;A0A1S4C3A2	GTP-binding protein TypA/BipA homolog	LOC107815102;LOC107805650	36.4	21	74.914			1112100000	1213000000	1252400000	1192500000	989840000	1146200000	1163800000	1.09995e+09	1.08414
A0A1S4ASQ4;A0A1S3ZZM0;A0A1S3XC99	GTP-binding protein YPTM2-like; ras-related protein RABD2a-like	LOC107801023;LOC107792089	22.2	1	22.518			31582000	25755000	30360000	2.92323e+07	15406000	0	22545000	1.26503e+07	2.3108
A0A1S3ZFA1	G-type lectin S-receptor-like serine/threonine-protein kinase RLK1	LOC107786027	6	2	49.266			0	0	0	0	0	19283000	0	6.42767e+06	0
A0A1S4D125;A0A1S3YJI1	guanine deaminase-like	LOC107824831;LOC107776708	5.4	1	20.325			0	0	0	0	0	0	7470400	2.49013e+06	0
A0A1S3ZAB7	guanine nucleotide-binding protein subunit beta-like protein	LOC107784677	62.2	17	35.962			1417900000	1613900000	1388200000	1.47333e+09	978230000	1085300000	1146100000	1.06988e+09	1.37711
A0A1S3Y4V1	guanine nucleotide-binding protein subunit beta-like protein	LOC107772203	55.5	9	35.827			363920000	349830000	334560000	3.49437e+08	246060000	272030000	307660000	275250000	1.26952
A0A1S4ABX7	guanine nucleotide-binding protein subunit beta-like protein	LOC107795918	62.2	3	36.02			96574000	107290000	100680000	1.01515e+08	72208000	72217000	93200000	7.92083e+07	1.28162
A0A1S3Z155	guanine nucleotide-binding protein subunit beta-like protein	LOC107781651	41.5	2	35.698			26552000	21865000	21997000	2.34713e+07	0	17455000	0	5.81833e+06	4.03403
A0A1S3XG61	guanine nucleotide-binding protein subunit beta-like protein	LOC107764826	49.1	1	25.328			0	0	0	0	0	0	0	0	#DIV/0!
A0A1S3XD32;P49026	guanine nucleotide-binding protein subunit beta-like protein; Guanine nucleotide-binding protein subunit beta-like protein	LOC107763849	51.2	2	35.845			20494000	30602000	31541000	2.75457e+07	23545000	26901000	30250000	2.68987e+07	1.02405
O22402;A0A1S4CWC7;A0A1S3ZKU5	Guanosine nucleotide diphosphate dissociation inhibitor	GDI	59.2	20	49.702			1427200000	1513700000	1481100000	1474000000	1489100000	1523000000	1441900000	1.48467e+09	0.992815
A0A1S4CT71;A0A1S3XPR2	Guanosine nucleotide diphosphate dissociation inhibitor	LOC107822292	40.8	1	49.825	+		12152000	0	0	4.05067e+06	0	0	0	0	#DIV/0!
A0A1S4AIN7;A0A1S3ZZQ9	Guanylate kinase	LOC107798050;LOC107792253	11.3	3	34.054			43205000	46155000	42328000	43896000	57810000	61419000	194710000	1.04646e+08	0.41947
A0A1S4C7N1	H(+)-exporting diphosphatase	LOC107815824	20.6	17	80.035			2242200000	2292800000	2241600000	2.25887e+09	2385400000	2268300000	2353200000	2.33563e+09	0.967132
Q43798;A0A1S3YD88;A0A1S4BJR2;A0A1S4A7G1;A0A1S4BZB1;A0A1S4AN35	H(+)-exporting diphosphatase	ppa;LOC107774827	17	5	80.227			314540000	300190000	265590000	293440000	313420000	279530000	257480000	2.83477e+08	1.03515
A0A1S3X544	H(+)-exporting diphosphatase	LOC107761395	19.7	1	80.049			80334000	84440000	81081000	8.19517e+07	100050000	85666000	92135000	92617000	0.884845
A0A0M4K692	H(+)-transporting two-sector ATPase	orfB	9.6	2	17.933			144010000	186350000	132120000	154160000	119510000	128870000	148650000	1.32343e+08	1.16485
A0A1S3YJU7	haloacid dehalogenase-like hydrolase domain-containing protein At2g33255	LOC107776939	31	4	25.319			53345000	37870000	77812000	5.63423e+07	39706000	51896000	29308000	4.03033e+07	1.39796
A0A1S3ZX72	haloacid dehalogenase-like hydrolase domain-containing protein At3g48420	LOC107791365	50.5	16	33.936			2807100000	2554200000	2416300000	2.59253e+09	3325100000	3201700000	3056000000	3.19427e+09	0.811621
A0A1S3X3J1	haloacid dehalogenase-like hydrolase domain-containing protein At3g48420	LOC107760931	41.8	1	33.976			24082000	30210000	33747000	2.93463e+07	50256000	42188000	39841000	44095000	0.665525
A0A1S4CCF6	haloacid dehalogenase-like hydrolase domain-containing protein At4g39970	LOC107817564	50.2	14	34.507			1073500000	1006900000	1078900000	1053100000	1046100000	1046500000	996480000	1.02969e+09	1.02273
A0A1S3Z6S8	haloacid dehalogenase-like hydrolase domain-containing protein At4g39970	LOC107783585	43.8	1	34.486			39878000	42784000	36565000	3.97423e+07	44958000	38576000	37223000	4.02523e+07	0.98733
A0A1S3YQ11;A0A1S4AGZ2;A0A1S3ZVG2	haloalkane dehalogenase-like; uncharacterized protein LOC107797586	LOC107778473;LOC107797586	21.9	6	42.522			237500000	361900000	288620000	2.96007e+08	257570000	295810000	325310000	2.92897e+08	1.01062
Q5QJB2	Harpin binding protein 1	HrBP1	44.9	10	29.998			1989800000	2111000000	2038200000	2.04633e+09	2779700000	2340400000	2394400000	2.50483e+09	0.816954
A0A1S4AE85	heat shock 70 kDa protein	LOC107796657	17.3	1	71.884			0	0	0	0	214380000	0	0	71460000	0
A0A1S3ZV02;A0A1S3XL99	heat shock 70 kDa protein 15-like	LOC107790714;LOC107766483	36.9	29	93.775			9514500000	8421400000	7541800000	8.49257e+09	1653600000	1627200000	1510700000	1.59717e+09	5.31727
A0A1S3Z8Y2	heat shock 70 kDa protein 15-like	LOC107784103	35.5	4	94.241			103950000	63466000	65530000	7.76487e+07	92136000	65758000	56597000	71497000	1.08604
A0A1S4AR76;A0A1S3Y760;A0A1S4D0V5	heat shock 70 kDa protein 15-like isoform X1	LOC107800496	34.5	10	94.503			854260000	736320000	908310000	8.32963e+08	926800000	866780000	692160000	828580000	1.00529
A0A1S4BTN3;A0A1S4CV52	heat shock 70 kDa protein 17	LOC107811763	11.6	9	99.43			568630000	487570000	487920000	5.14707e+08	167460000	176400000	185500000	1.76453e+08	2.91696
A0A1S3YZP9	heat shock 70 kDa protein 17-like	LOC107781175	10.3	3	77.195			35423000	25543000	25492000	2.88193e+07	32856000	25546000	29427000	2.92763e+07	0.98439
A0A1S3YGZ0;A0A1S3ZSV9	heat shock 70 kDa protein, mitochondrial	LOC107775921;LOC107790051	37.3	19	73.131			8444400000	9314100000	7371500000	8.37667e+09	1423900000	1362900000	1442300000	1409700000	5.94216
A0A1S3YCL2	heat shock 70 kDa protein, mitochondrial	LOC107774810	68.6	1	12.578			27058000	0	27961000	1.83397e+07	35260000	32289000	28321000	3.19567e+07	0.573892
A0A1S3YCI5;A0A1S3YSW6	heat shock 70 kDa protein, mitochondrial; heat shock 70 kDa protein, mitochondrial-like	LOC107774811;LOC107779402	37.9	6	72.988			312370000	271490000	258990000	280950000	301350000	263440000	264910000	2.76567e+08	1.01585
A0A1S3XEM4	heat shock 70 kDa protein, mitochondrial-like	LOC107764273	43.4	1	30.558			45822000	40621000	68463000	5.16353e+07	38721000	35460000	28619000	3.42667e+07	1.50687
A0A1S4B2J7;A0A1S4AP80;A0A1S4D4H6;A0A1S4B3H0;A0A1S4BWE2;A0A1S3YB01;A0A1S3YZJ6;A0A1S3Z8A5;A0A1S3ZCG4;A0A1S3YMI3	heat shock cognate 70 kDa protein 2; heat shock cognate 70 kDa protein 2-like	LOC107803885;LOC107799868	68.5	18	70.968			3312300000	3314100000	3525800000	3.38407e+09	3008300000	3313100000	3312600000	3.21133e+09	1.05379
A0A1S3XKS8	heat shock cognate 70 kDa protein 2-like	LOC107766295	67.7	9	71.013			929330000	822030000	821200000	857520000	241380000	385240000	241810000	2.89477e+08	2.96231
A0A1S3XTB8;A0A1S3ZAJ7	heat shock cognate 70 kDa protein 2-like	LOC107768506	67.7	1	70.966			20433000	19522000	12884000	17613000	9713200	26180000	28730000	2.15411e+07	0.817648
A0A1S4BZY8;A0A1S4BFV5;P36182	heat shock cognate protein 80	LOC107813596	51.5	4	80.201			233820000	233820000	243840000	237160000	216240000	231860000	209840000	2.19313e+08	1.08138
A0A1S3XU77;A0A1S3XGK4	heat shock cognate protein 80-like	LOC107768797;LOC107764955	53.8	43	80.268			7520500000	7319000000	7258400000	7.36597e+09	6822300000	6482200000	6315500000	6540000000	1.12629
A0A1S3ZUI8	heat shock cognate protein 80-like	LOC107790625	55.1	2	71.91			157430000	165620000	189810000	1.70953e+08	190300000	192520000	242690000	2.08503e+08	0.819907
A0A1S4BSD9	heat shock factor-binding protein 1-like	LOC107811395	54.5	1	9.7426			0	0	0	0	0	0	66209000	2.20697e+07	0
A0A1S4B4I3;A0A1S3ZX95	heat shock factor-binding protein 1-like; uncharacterized protein LOC107791417	LOC107804453;LOC107791417	63.6	5	9.7966			128350000	124720000	134570000	1.29213e+08	135740000	142000000	118220000	1.31987e+08	0.978988
I7GVS5	Heat shock protein 70	NtHsp70	68.7	46	71.104			11918000000	12074000000	12313000000	1.21017e+10	10493000000	11332000000	11837000000	1.12207e+10	1.07852
G9MD86	Heat shock protein 90	NtHsp90er-1	35.3	28	93.156			954840000	935120000	869800000	919920000	291560000	198560000	155230000	2.15117e+08	4.27638
Q14TB1;A0A1S3XHJ8;A0A1S4CCK2;A0A1S3Y526	Heat shock protein 90	hsp90	51.5	1	80.208			31281000	39332000	33334000	34649000	39878000	41503000	34929000	38770000	0.893706
A0A1S3ZAW0	heat shock protein 90-5, chloroplastic-like	LOC107784815	63.5	41	91.008			5281000000	4926700000	4972800000	5.06017e+09	4640600000	5122100000	5104000000	4.95557e+09	1.02111
A0A1S3ZDE0	heat shock protein 90-5, chloroplastic-like	LOC107785602	61.7	4	90.983			142220000	131300000	172160000	148560000	150320000	155530000	164970000	156940000	0.946604
A0A1S3XXX9;A0A1S4CQZ0	heat shock protein 90-6, mitochondrial-like	LOC107769814;LOC107821521	17.6	6	89.913			721060000	91849000	137050000	316653000	126430000	109810000	95722000	110654000	2.86165
A0A1S4BC38	HECT-type E3 ubiquitin transferase	LOC107806692	1.1	3	403.29			23037000	21181000	20587000	2.16017e+07	23811000	24147000	30278000	2.60787e+07	0.828327
A0A1S3ZBD5	HECT-type E3 ubiquitin transferase	LOC107785026	0.8	1	372.85			0	0	0	0	0	0	0	0	#DIV/0!
A0A1S4CGA1	heme oxygenase 1, chloroplastic-like	LOC107818591	31.3	8	32.267			384720000	376950000	381740000	3.81137e+08	478300000	397470000	414930000	4.30233e+08	0.885884
A0A1S4CPU3;A0A1S3Z1M3	heme-binding protein 2-like	LOC107821167;LOC107782040	47.4	10	25.97			3040000000	3044400000	3209300000	3097900000	3939600000	3488400000	3566500000	3.66483e+09	0.845304
A0A1S3YEB5;A0A1S4AX09	heme-binding-like protein At3g10130, chloroplastic	LOC107775162;LOC	32.7	6	22.109			144360000	159950000	154630000	152980000	194150000	202360000	171560000	1.89357e+08	0.807893
A0A1S4DCE0;A0A1S4BYA1	heparanase-like protein 3	LOC107828335;LOC107813165	4.8	2	59.602			7557000	11088000	12290000	1.03117e+07	0	0	0	0	#DIV/0!
A0A1S4C146;A0A1S3X3V9	heterogeneous nuclear ribonucleoprotein 1-like	LOC107814059;LOC10776089	25.5	9	46.829			745630000	794860000	702630000	7.47707e+08	1002300000	921350000	832790000	9.18813e+08	0.813774
A0A1S4BH10;E2F3S8;E2F3S9;A0A1S3XJM8	heterogeneous nuclear ribonucleoprotein 1-like; G-strand specific single-stranded telomere-binding protein 1	LOC107808160;GTBP1	13	4	36.257			56982000	53727000	63252000	57987000	56391000	57268000	48489000	5.40493e+07	1.07285
A0A1S3YQ56;A0A1S3ZN52	heterogeneous nuclear ribonucleoprotein D-like	LOC107778564;LOC10778863	3	1	40.504			0	0	0	0	0	0	0	0	#DIV/0!
Q9SEK2;A0A1S4AH17	Hexokinase-1; Phosphotransferase	HXK1;LOC107797523	18.9	6	53.739			84224000	70501000	92547000	82424000	79956000	77092000	62006000	73018000	1.12882
A0A1S4DG79;A0A1S4B9M5;A0A1S4D1G7;A0A1S4A3S7	Hexosyltransferase	LOC107829552;LOC107806026	6.5	3	56.36			29539000	0	0	9.84633e+06	24103000	0	25550000	16551000	0.594909
A0A1S4AS24	high-light-induced protein, chloroplastic	LOC107800613	23.1	4	12.652			238980000	247280000	230430000	2.38897e+08	209690000	208150000	213610000	2.10483e+08	1.13499
A0A1S4DRS9	hippocampus abundant transcript-like protein 1	LOC107832780	2.3	1	48.159			24461000	30519000	28146000	2.77087e+07	15114000	14337000	13944000	14465000	1.91557
A0A1S3Z8B0;A0A1S3X2J0	histidine biosynthesis bifunctional protein hisIE, chloroplastic-like	LOC107784152	6.4	2	31.552			26536000	36756000	26712000	3.00013e+07	26613000	14078000	26093000	2.22613e+07	1.34769
A0A1S3YPB5;A0A1S4B620	Histidine--tRNA ligase	LOC107778161;LOC107804891	8.5	4	56.717			65131000	85844000	74310000	75095000	87400000	101360000	78665000	8.91417e+07	0.842423
A0A1S3ZWZ1;A0A1S4CX97;A0A1S4DH75;A0A1S4B315	histidine--tRNA ligase, cytoplasmic-like; Histidine--tRNA ligase	LOC107791338;LOC107823592	6.5	5	94.816			55196000	85545000	60057000	6.69327e+07	51291000	60115000	73057000	6.14877e+07	1.08855
A0A1S4BE22	Histidinol dehydrogenase	LOC107807270	20.2	7	52.915			206340000	210730000	212750000	209940000	217530000	227720000	221970000	2.22407e+08	0.943947
A0A1S3YTZ1;A0A1S3Y0V6	Histidinol dehydrogenase	LOC107779522	17.5	1	53.013			35167000	34813000	44856000	3.82787e+07	39015000	34744000	33080000	35613000	1.07485
A0A1S3XCC1	histidinol dehydrogenase, chloroplastic-like	LOC107763421	29.3	1	26.862			0	0	0	0	0	0	9760900	3.25363e+06	0
O82030;A0A1S4CX32;A0A1S4BH30;A0A1S3Y718	Histidinol-phosphate aminotransferase, chloroplastic; Imidazole acetol-phosphate transaminase	HPA;LOC107823535	13.1	5	46.328			93424000	95402000	101520000	96782000	72686000	85917000	69497000	7.60333e+07	1.27289
A0A1S4AAB7;A0A1S3XKF4	Histone acetyltransferase	LOC107795458;LOC107766167	0.5	1	188.72	+		36284000	0	0	1.20947e+07	0	0	0	0	#DIV/0!
A0A1S3Y3N2	Histone acetyltransferase	LOC107771873	3.7	1	52.788			0	0	0	0	0	0	40014000	13338000	0
A0A1S3Z9Z2;A0A1S3XKN4	histone H1-like; LOW QUALITY PROTEIN: histone H1-like	LOC107784565;LOC107766305	9.1	2	30.56			0	10421000	0	3.47367e+06	0	0	0	0	#DIV/0!
A0A1S4BEC6;A0A1S3XDY2;A8J6V0;A0A1S4CJ57;A0A1S3YPF6;A0A1S4DI25;A0A1S3ZTP9;A0A1S3YPP7;P93354;A0A1S4D4Q1;A0A1S4AXD3;A0A1S3YPS5;A0A1S3YFP6;A0A1S4CBT7;A0A1S3Y3P7;A0A1S4DP59;A0A1S4C6T4;A0A1S3Y1Z7;A0A1S4D047;A0A1S4B4Z9	Histone H2B	LOC107807323;LOC107764049	11.9	2	14.532			54336000	62557000	0	3.89643e+07	0	50595000	53784000	34793000	1.11989
A0A9R6;A0A1S4AKB5;A0A1S4BDS0;A0A1S3XDX6;A0A1S3Y8K5;A0A1S4D357	Histone H4	NtH4;LOC107798555;L	19.4	2	11.425			25009000	43326000	25978000	3.14377e+07	21862000	21970000	19148000	2.09933e+07	1.49751
A0A1S4APX4	histone-lysine N-methyltransferase 2D-like	LOC107800166	0.8	1	150.2			6729700	0	0	2.24323e+06	7660500	5645600	9056000	7.45403e+06	0.300942
A0A1S4B4B2;A0A1S3XQ32	histone-lysine N-methyltransferase setd3-like	LOC107804400;LOC107767517	27.5	9	57.353			398880000	317060000	353690000	3.56543e+08	382700000	362310000	384290000	3.76433e+08	0.947162
A0A1S3Z6C5	HMG-Y-related protein A-like	LOC107783486	29.8	4	17.723			80338000	68888000	74822000	7.46827e+07	67646000	70561000	94940000	7.77157e+07	0.960973
A0A1S3YQV4;A0A1S3XHP5	HMG-Y-related protein B-like	LOC107778578;LOC107765117	7.6	1	21.027			14998000	32501000	30271000	2.59233e+07	35679000	28849000	31580000	32036000	0.809194
A0A1S4D2E4;A0A1S4CE34	homogentisate solanesyltransferase, chloroplastic-like	LOC107825180	7.6	3	43.411			68097000	79773000	63049000	7.03063e+07	66515000	71976000	63979000	67490000	1.04173
A0A1S4BR13;A0A1S3Y890	Homoserine kinase	LOC107811011;LOC107773282	4.9	1	40.068			35091000	0	0	11697000	22881000	18721000	25116000	2.22393e+07	0.52596
A0A1S4CVM1;A0A1S3XFF6;A0A1S4CII4;A0A1S3Z8N5	hsp70-Hsp90 organizing protein 2-like	LOC107823196	33.1	13	55.564			519100000	460010000	491310000	490140000	567600000	562410000	513370000	5.47793e+08	0.894753
A0A1S3XGU4	hsp70-Hsp90 organizing protein 2-like	LOC107764856	65.9	5	32.536			194830000	196340000	178220000	1.89797e+08	259260000	198680000	214400000	2.24113e+08	0.846878
A0A1S4DLE6	huntingtin-interacting protein K-like	LOC107831008	22	2	12.174			0	0	0	0	0	0	26376000	8792000	0
B8Y3H9	Hydrogen peroxide-induced 1	LOC107800468	15	1	13.573			13093000	0	11328000	8.14033e+06	0	11591000	0	3.86367e+06	2.10689
A0A1S4DHV0;A0A1S4A9U5	hydroquinone glucosyltransferase-like; Glycosyltransferase	LOC107829970;LOC107795311	2.1	1	52.63			15540000	16147000	14300000	15329000	0	17584000	20531000	12705000	1.20653
A0A1S4DCC6	hydroxyacylglutathione hydrolase cytoplasmic	LOC107828289	3.9	1	28.829			22790000	20705000	26982000	2.34923e+07	30252000	23595000	28768000	2.75383e+07	0.853078
A0A1S3XSC6	Hydroxymethylbilane synthase	LOC107767993	68.8	21	39.247			7104800000	6718700000	6871400000	6898300000	7898400000	7014900000	6966800000	7.29337e+09	0.945832
A0A1S4AYZ7	Hydroxymethylbilane synthase	LOC107802823	60.8	7	39.961			557410000	601130000	619520000	5.92687e+08	764990000	539200000	653510000	6.52567e+08	0.908239
A0A1S4AY65	Hydroxymethylbilane synthase	LOC107802603	68.8	1	39.404			159690000	125040000	154710000	146480000	102490000	98085000	138580000	1.13052e+08	1.29569
A0A1S4DII9	Hydroxymethylbilane synthase	LOC107830132	56.2	2	39.928			0	0	0	0	0	63137000	0	2.10457e+07	0
A0A1S4AYZ4;A0A1S3YL66;A0A1S4AK38;A0A1S4C9C8	Hydroxymethylglutaryl-CoA synthase	LOC107802821;LOC107777352	10.4	4	51.288			136900000	140510000	128490000	135300000	129720000	128380000	139310000	132470000	1.02136
A0A1S4B6K8	Hydroxymethylglutaryl-CoA synthase	LOC107805038	8	2	51.113			10146000	0	0	3382000	9975100	0	12103000	7.35937e+06	0.45955
A0A1S4ADF8	Hydroxymethylglutaryl-CoA synthase	LOC107796407	8	1	51.05			0	6947000	0	2.31567e+06	0	11374000	6406800	5.92693e+06	0.390702
A0A1S4C5W5	hydroxyphenylpyruvate reductase-like	LOC107815507	55.3	13	34.2			993400000	957880000	996640000	982640000	1120100000	1102600000	1039900000	1.08753e+09	0.903549
A0A1S4C5C0	hydroxyphenylpyruvate reductase-like	LOC107815351	50.8	2	34.297			58592000	60840000	51994000	57142000	76241000	67005000	74426000	7.25573e+07	0.787543
A0A1S4D8E2;A0A1S4C571	hydroxyphenylpyruvate reductase-like	LOC107827083;LOC107815302	10.5	2	34.451			0	13490000	34277000	1.59223e+07	0	35292000	0	11764000	1.35348
A0A1S4CK57;A0A1S3YAR9	IAA-amino acid hydrolase ILR1-like 4	LOC107819938;LOC107774327	10	3	48.486			26662000	18269000	22436000	2.24557e+07	10688000	16923000	21099000	1.62367e+07	1.38302
A0A1S4D3R4;A0A1S3Y577	Imidazole glycerol phosphate synthase hisHF	LOC107825612;LOC107772419	10.2	5	64.711			59966000	55796000	56507000	57423000	47189000	46332000	52113000	4.85447e+07	1.18289
A0A1S4D2L1;A0A1S4B1M8	importin beta-like SAD2	LOC107825337;LOC107803526	2.4	2	87.28			14156000	17735000	10279000	1.40567e+07	0	16422000	21583000	1.26683e+07	1.10959
A0A1S4BPR4;A0A1S4D8V1	Importin subunit alpha	LOC107810574;LOC107827218	20.6	8	58.521			137760000	139510000	144140000	140470000	149180000	147320000	127940000	141480000	0.992861
A0A1S4A241	Importin subunit alpha	LOC107792893	14.2	4	58.642			63005000	59761000	75787000	6.61843e+07	69261000	57871000	54441000	6.05243e+07	1.09352
A0A1S4ARZ0;A0A1S3XBS9	Importin subunit alpha	LOC107800647;LOC107763392	4.5	1	58.686			15514000	16322000	13276000	1.50373e+07	15319000	0	18520000	1.12797e+07	1.33314
A0A1S4CDW9;A0A1S3XP24;A0A1S4BYG9;A0A1S3XM34	importin subunit beta-1-like	LOC107817967;LOC107767272	10.4	6	96.076			349160000	336210000	311640000	3.32337e+08	380650000	372000000	334230000	3.62293e+08	0.917314
A0A1S4BIL8;A0A1S4AL48	importin subunit beta-1-like	LOC107808696;LOC107798936	3.3	2	96.227			20392000	24878000	22185000	22485000	16218000	15233000	30805000	20752000	1.08351
A0A1S3YFI2	importin-5-like	LOC107775544	13.5	11	123.28			223730000	228600000	246280000	232870000	210910000	241430000	256900000	2.36413e+08	0.985012
A0A1S3YA34	importin-5-like	LOC107773943	13.3	2	73.796			57032000	56384000	42528000	5.19813e+07	59116000	53101000	53241000	5.51527e+07	0.942499
A0A1S3Y9F0	importin-5-like	LOC107773903	12.1	1	123.02	+		24508000	24164000	20312000	2.29947e+07	23505000	25729000	26891000	25375000	0.906194
A0A1S4DF56	importin-5-like	LOC107829057	9.8	1	123.29	+		0	0	0	0	0	0	0	0	#DIV/0!
A0A1S3Z3U7	inactive leucine-rich repeat receptor-like protein kinase CORYNE isoform X1	LOC107782689	2.7	1	41.193			3868500000	3159200000	0	2.34257e+09	4569700000	4070800000	0	2.88017e+09	0.813344
A0A1S3Y0T0;A0A1S4ADS5;A0A1S3Y128;A0A1S4ACX9	indole-3-acetic acid-amido synthetase GH3.6-like	LOC107770902;LOC1077	9.5	4	68.711			51001000	82528000	44839000	59456000	63228000	54460000	43624000	5.37707e+07	1.10573
A0A1S3ZU87;A0A1S4A8M3;A0A1S3ZI84;A0A1S3XWU1	Indole-3-glycerol-phosphate synthase	LOC107790475;LOC107794948	13.7	4	44.914			80920000	74627000	80589000	78712000	90050000	121640000	84918000	9.88693e+07	0.796121
A0A1S4B9E2	induced stolen tip protein TUB8-like	LOC107805948	23.8	1	16.209			486730000	443400000	521820000	4.83983e+08	906190000	990430000	598280000	8.31633e+08	0.581967
A0A1S4CZ43	induced stolen tip protein TUB8-like	LOC107824169	23.3	1	16.477			420220000	270640000	256860000	3.15907e+08	439690000	442130000	385900000	4.22573e+08	0.747578
A0A1S3ZQS3	induced stolen tip protein TUB8-like	LOC107789420	84.3	7	15.668			810410000	729430000	865380000	801740000	1442900000	1373000000	1500200000	1438700000	0.557267
A0A1S4CYS2;A0A1S4AXL6	inner membrane protein PPF-1, chloroplastic-like	LOC107824065;LOC1078	9.4	4	48.816			239810000	243630000	247380000	2.43607e+08	239600000	200020000	206820000	215480000	1.13053
A0A1S3YBI7	Inorganic diphosphatase	LOC107774375	48.6	18	32.425			4837900000	4619100000	4567600000	4.67487e+09	5777100000	5251600000	5074300000	5.36767e+09	0.870931
A0A1S3YW39	Inorganic diphosphatase	LOC107780338	56.2	15	32.511			1506100000	1466400000	1479000000	1.48383e+09	1848900000	1547800000	1507100000	1634600000	0.907765
A0A1S4BMK1	Inorganic diphosphatase	LOC107809932	32.7	3	24.074			240460000	211990000	210260000	2.20903e+08	294690000	249680000	276040000	273470000	0.807779
A0A1S4A194	Inorganic diphosphatase	LOC107792725	48.6	1	32.377			217920000	207630000	178150000	2.01233e+08	333370000	234910000	184980000	2.51087e+08	0.80145
A0A1S4CAN9;A0A1S3XYH5;A0A1S3XU34	Inorganic diphosphatase	LOC107817041;LOC107770183	37	6	24.464			226740000	221000000	235980000	2.27907e+08	241320000	241460000	214690000	232490000	0.980286
A0A1S4DBR1;A0A1S3ZPR8;A0A1S4CWK8;A0A1S4APB8;A0A1S4CCP8;A0A1S4C6E0	Inorganic diphosphatase	LOC107828128;LOC107789004	24.9	2	24.013			29345000	30317000	32645000	30769000	28217000	46920000	27463000	34200000	0.899678
A0A1S3YES5;A0A1S3X2W7	Inosine-5-monophosphate dehydrogenase	LOC107775294	11.2	3	53.255			62644000	58669000	50049000	5.71207e+07	48203000	47084000	46935000	4.74073e+07	1.20489
A0A1S4C602;A0A1S3YBE3	Inositol polyphosphate multikinase	LOC107815456;LOC107774418	3.6	1	33.73			0	0	0	0	0	0	0	0	#DIV/0!
A0A1S4CQY1;A0A1S3X4G1;A0A1S3Z661	Inositol-1-monophosphatase	LOC107821508;LOC107761059	22.8	7	38.31			322080000	338870000	310220000	3.23723e+08	465240000	396770000	395480000	4.19163e+08	0.772308
A0A1S4AVN2;A0A1S4DLY5	Inositol-1-monophosphatase	LOC107801850;LOC107831188	34.8	8	29.151			371980000	391240000	414780000	3.92667e+08	463300000	415710000	430330000	4.36447e+08	0.89969
Q9LW96;A0A1S3XLH4;A0A1S4BI04;A0A1S3WYH5	Inositol-3-phosphate synthase	LOC107766502	29.8	12	56.369			389840000	325230000	316450000	343840000	462030000	483860000	516850000	487580000	0.705197
A0A1S4ABR8	Inositol-3-phosphate synthase	LOC107795866	27.1	1	56.421			14010000	0	13994000	9.33467e+06	21952000	39428000	16389000	25923000	0.360092
A0A1S4D4J4	insulin-degrading enzyme-like 1, peroxisomal	LOC107825793	20.4	15	112.11			309670000	248230000	278130000	2.78677e+08	227740000	266460000	277040000	257080000	1.08401
A0A1S4CQZ4	insulin-degrading enzyme-like 1, peroxisomal	LOC107821603	20.5	2	112.26			36878000	24172000	48761000	3.66037e+07	32254000	0	0	1.07513e+07	3.40457
A0A1S4CYH1;A0A1S3YLJ3	iron-sulfur assembly protein IscA, chloroplastic-like isoform X1	LOC107823988	6.8	1	19.081			0	0	0	0	0	0	0	0	#DIV/0!
A0A1S3Y3Z9;A0A1S3X7L7	isoamylase 3, chloroplastic isoform X1; isoamylase 3, chloroplastic-like	LOC107771936;LOC107761962	4.4	3	86.916			36459000	37685000	34369000	36171000	39255000	39125000	31235000	3.65383e+07	0.989947
A0A1S3ZNV6;A0A1S3Y0B9;A0A1S4AE46	isoaspartyl peptidase/L-asparaginase 1-like	LOC107788825;LOC107770841	20.3	5	33.362			73608000	63693000	67287000	68196000	72654000	68572000	95176000	7.88007e+07	0.865424
A0A1S4C2Z5;A0A1S4BYT9	Isocitrate dehydrogenase [NAD] subunit, mitochondrial	LOC107814521	30.2	9	40.181			281860000	257730000	309150000	2.82913e+08	235160000	213350000	251460000	2.33323e+08	1.21254
A0A1S4C7R4;A0A1S3XUI8;P50218;A0A1S4C1D0;A0A1S4BLC9;A0A1S4BW56	Isocitrate dehydrogenase [NADP]	LOC107815853;LOC107768947	57.3	22	46.757			2865700000	2915600000	2837400000	2872900000	2887500000	2914100000	3020600000	2.94073e+09	0.976933
A0A1S4CAM8	Isocitrate dehydrogenase [NADP]	LOC107816938	28	4	46.989			426110000	335570000	284310000	3.48663e+08	391220000	329300000	304820000	341780000	1.02014
A0A1S4AVB8	Isocitrate dehydrogenase [NADP]	LOC107801694	24.3	1	53.893	+		0	0	0	0	0	0	7577200	2.52573e+06	0
A0A1S3XPX1;A0A1S4BKN7	isoflavone reductase-like protein	LOC107767471	17.5	3	33.839			71783000	67575000	61913000	6.70903e+07	34102000	42548000	44358000	40336000	1.66329
A0A1S4ABU0;A0A1S4B9B6	Isoleucine--tRNA ligase	LOC107795941;LOC107805901	11.7	11	125.22			267670000	247550000	258310000	2.57843e+08	248210000	276450000	256740000	2.60467e+08	0.989928
A0A1S3XHC9;A0A1S3XB17	Isoleucine--tRNA ligase	LOC107765258	9.2	8	135.09			124410000	120450000	125720000	1.23527e+08	85140000	97968000	116600000	9.99027e+07	1.23647
A0A1S4CHP0	isoleucine--tRNA ligase, cytoplasmic-like	LOC107819118	11.6	1	49.7			0	0	0	0	0	18545000	0	6.18167e+06	0
A0A1S4CQW2;A0A1S4CRL4	Isopentenyl-diphosphate Delta-isomerase	LOC107821727;LOC107821723	38	9	32.684			468520000	425230000	494100000	4.62617e+08	465470000	538770000	423270000	4.75837e+08	0.972217
A0A1S4BI62;Q9AVG7	Isopentenyl-diphosphate Delta-isomerase	LOC107808544;ipi2	38.3	3	27.135			36469000	28931000	30265000	3.18883e+07	40190000	33749000	37999000	3.73127e+07	0.854625
Q9AVG8;P93355	Isopentenyl-diphosphate Delta-isomerase	ipi1	30	1	33.203			20188000	24115000	27464000	2.39223e+07	28417000	21950000	20378000	2.35817e+07	1.01445
A0A1S4D5K0;A0A1S3ZD18	isovaleryl-CoA dehydrogenase, mitochondrial-like; isovaleryl-CoA dehydrogenase, mitochondrial	LOC107826219;LOC107785489	11.5	3	44.785			41671000	43035000	45258000	4.33213e+07	42626000	56161000	45103000	4.79633e+07	0.903218
A0A1S3XFS0;A0A1S3YTX2	IST1-like protein; uncharacterized protein LOC107779703	LOC107764592;LOC107779703	3.6	1	34.857			17313000	18205000	18993000	1.81703e+07	29180000	21619000	16171000	2.23233e+07	0.813961
A0A1S4CET6	K(+) efflux antiporter 2, chloroplastic-like	LOC107818210	21	3	27.588			106610000	111550000	151050000	123070000	105820000	131310000	151470000	1.29533e+08	0.950103
A0A1S4DLF6;A0A1S3XTD5	K(+) efflux antiporter 2, chloroplastic-like isoform X1; K(+) efflux antiporter 2, chloroplastic-like	LOC107831030;LOC1	10.6	9	115.64			238980000	242980000	239150000	240370000	244920000	253820000	261380000	2.53373e+08	0.948679
A0A1S4CVJ0	keratinocyte proline-rich protein-like	LOC107823062	10.1	1	22.187			51100000	65935000	63797000	6.02773e+07	65777000	77215000	66695000	6.98957e+07	0.86239
A0A1S4CS20;A0A1S3YTZ2;A0A1S3WXY0	Ketol-acid reductoisomerase	LOC107821876;LOC107779760	34.2	18	63.314			2459200000	2595700000	2593300000	2549400000	1901600000	2239200000	2264500000	2135100000	1.19404
A0A1S4CMC2	Ketol-acid reductoisomerase	LOC107820600	31.6	5	63.766			657730000	445830000	715340000	606300000	193250000	403190000	559790000	385410000	1.57313
A0A1S3YDV6	Ketol-acid reductoisomerase	LOC107775146	32.6	4	63.342			466410000	471780000	397900000	4.45363e+08	369130000	377480000	472730000	4.06447e+08	1.09575
A0A1S4CKZ6;A0A1S4C453	KH domain-containing protein At4g18375; KH domain-containing protein At4g18375-like	LOC107819928;LOC107814867	1.9	1	66.446			25242000	0	25632000	16958000	18846000	20120000	24100000	21022000	0.806679
A0A1S4ADF0;A0A1S4DNV0;A0A1S3ZWK1	kinesin-like protein KCA2	LOC107796397;LOC107831563	8.5	8	144.08			180390000	216200000	210080000	2.02223e+08	195000000	182830000	220600000	1.99477e+08	1.01377
A0A1S4DG49;A0A1S3XN01	kirola-like	LOC107829385;LOC107766931	28.8	9	34.683			238500000	246100000	222320000	235640000	304230000	285040000	293090000	294120000	0.80117
A0A1S4AJP9;A0A1S3Y0U7	kirola-like	LOC107798378	32	4	16.742			101870000	86748000	147710000	1.12109e+08	100940000	114030000	87051000	1.00674e+08	1.11359
A0A1S4DIJ6	kirola-like isoform X1	LOC107830234	46.9	8	16.736			542720000	588370000	571530000	567540000	957890000	842800000	918910000	9.06533e+08	0.626055
A0A1S3YGX2;A0A1S4DFX8;A0A1S4CD46;A0A1S4DSF0	kynurenine formamidase-like	LOC107776169;LOC107829293	16.2	4	33.605			85414000	55654000	88018000	76362000	110790000	61452000	95394000	89212000	0.855961
A0A1S4BEH4;A0A1S4APN6	kynurenine formamidase-like isoform X1	LOC107807372;LOC107799895	9.9	2	31.19			0	0	0	0	0	0	48362000	1.61207e+07	0
A0A1S3Z7W3;A0A1S3Y9C0	la protein 1-like	LOC107783974;LOC107773773	14.2	5	51.615			123870000	178650000	134120000	1.45547e+08	175340000	159760000	135270000	156790000	0.92829
A0A1S4AJD1;A0A1S4BYC5;A0A1S3Y8G1	Lactoylglutathione lyase	LOC107798087;LOC107813142	37	12	40.209			1934200000	2029200000	2236800000	2.06673e+09	2399300000	2280400000	2238100000	2.30593e+09	0.896268
A0A1S3XS26	Lactoylglutathione lyase	LOC107767887	59.7	15	32.858			1556900000	1690000000	1623700000	1.62353e+09	1982700000	1718500000	1509400000	1.73687e+09	0.934748
A0A1S4C9I1	Lactoylglutathione lyase	LOC107816579	28.7	6	26.498			281450000	293200000	269190000	281280000	335680000	326700000	296470000	3.19617e+08	0.880054
A0A1S4DCM6	Lactoylglutathione lyase	LOC107828196	22.4	6	39.922			68395000	58519000	64852000	63922000	89901000	63669000	51760000	6.84433e+07	0.93394
A0A1S3XF65	Lactoylglutathione lyase	LOC107764558	21.1	2	26.529			47642000	53283000	51335000	5.07533e+07	42529000	49320000	49075000	4.69747e+07	1.08044
A0A1S3XWI1	Lactoylglutathione lyase	LOC107769364	19.3	1	40.078			14133000	15589000	13053000	1.42583e+07	16414000	16118000	15085000	1.58723e+07	0.898314
A0A1S4B721	Lactoylglutathione lyase	LOC107805164	55.9	1	33.51			0	0	24733000	8.24433e+06	0	13836000	0	4612000	1.78758
A0A1S3ZU41;A0A1S3YPN3	lactoylglutathione lyase-like; uncharacterized protein YwkD-like	LOC107790415;LOC107778450	17.6	2	15.857			52795000	48685000	0	3.38267e+07	68526000	50518000	39386000	52810000	0.640535
A0A1S4AE39;A0A1S3XQS1	lamin-like protein	LOC107796663;LOC107767666	6.1	1	17.855			26573000	25994000	22893000	2.51533e+07	48439000	26982000	32216000	35879000	0.70106
A0A1S3X9X9	lamin-like protein	LOC107762834	9.1	1	19.666			0	0	0	0	0	12059000	0	4.01967e+06	0
A0A1S4AZV2;A0A1S3XK40	la-related protein 1C-like; la-related protein 1C-like isoform X1	LOC107803035;LOC107765844	4.6	1	59.028			0	0	0	0	0	0	0	0	#DIV/0!
A0A1S4C3B0;A0A1S4AE43	large proline-rich protein BAG6 isoform X1; large proline-rich protein BAG6-like isoform X1	LOC107814725;LOC107796671	7	3	81.555			18304000	30691000	26214000	2.50697e+07	23527000	34989000	32018000	30178000	0.830727
A0A1S4AES5	L-ascorbate oxidase homolog	LOC107796674	31.9	12	60.157			674570000	638500000	712600000	6.75223e+08	691030000	685250000	674400000	683560000	0.987804
A0A1S4AXF2;A0A1S3Z7T3;A0A1S3YMS5	L-ascorbate oxidase homolog	LOC107802342	27	2	60			151230000	95760000	132380000	1.26457e+08	200170000	134700000	141050000	158640000	0.79713
A0A1S3XRI8;A0A1S4BGS6;A0A1S4BIV5;A0A1S4DQI3	L-ascorbate oxidase homolog	LOC107767898;LOC107808106	9.9	4	60.138			38407000	30781000	38204000	3.57973e+07	51978000	37530000	50690000	4.67327e+07	0.766002
A0A1S4C2K6;A0A1S3ZYJ6	L-ascorbate oxidase homolog isoform X1; L-ascorbate oxidase homolog	LOC107814491;LOC107791783	7.2	3	60.407			37862000	42714000	43190000	4.12553e+07	49022000	51762000	43317000	4.80337e+07	0.858884
A0A1S3YK10;A0A1S3WYG6	L-ascorbate peroxidase 1, cytosolic-like; L-ascorbate peroxidase 1, cytosolic	LOC107776943;LOC107759348	52.4	11	27.466			1338900000	1495800000	1431900000	1422200000	1240700000	1629700000	1399800000	1423400000	0.999157
A0A1S4BKX7;A0A1S3YCX4	L-ascorbate peroxidase 2, cytosolic; L-ascorbate peroxidase 2, cytosolic-like	LOC107809385;LOC107774730	24.8	1	27.618			19142000	21550000	25352000	2.20147e+07	29623000	32935000	27517000	30025000	0.733211
A0A1S4CKJ4;A0A1S3YE60	L-ascorbate peroxidase 3, peroxisomal; L-ascorbate peroxidase 3, peroxisomal-like	LOC107819788;LOC107775122	40.8	13	31.578			603930000	624120000	569800000	5.99283e+08	642000000	675650000	681550000	666400000	0.899285
A0A1S3ZKC4	leiomodin-2-like	LOC107787669	20.7	2	18.407			62433000	66066000	68519000	6.56727e+07	49221000	58342000	59022000	5.55283e+07	1.18269
A0A1S3YFU4;A0A1S3ZWJ8	LETM1 and EF-hand domain-containing protein 1, mitochondrial-like; Mitochondrial proton/calcium exchanger protein	LOC107775562	5.2	1	61.843			0	0	0	0	0	0	11643000	3881000	0
A0A1S3XTG6	leucine aminopeptidase 2, chloroplastic	LOC107768570	71	32	60.727			4833000000	4955600000	4590400000	4793000000	6021500000	5287900000	5142600000	5484000000	0.873997
A0A1S4AV83	leucine aminopeptidase 2, chloroplastic-like	LOC107801578	69	6	57.343			332550000	332480000	527880000	3.97637e+08	444940000	407990000	305190000	386040000	1.03004
A0A1S4AWN0;A0A1S3ZPJ9	Leucine--tRNA ligase	LOC107802103;LOC107788946	20.8	17	122.88			237890000	241200000	253030000	244040000	197940000	205990000	238580000	214170000	1.13947
A0A1S4DR01;A0A1S3X6U9	Leucine--tRNA ligase	LOC107832508	7.9	6	110.16			166650000	178650000	160520000	1.68607e+08	146440000	148280000	163700000	1.52807e+08	1.1034
A0A1S4A755	Leucine--tRNA ligase	LOC107794429	8.7	4	122.75			50959000	51883000	40505000	4.77823e+07	43686000	50269000	54314000	49423000	0.966804
A0A1S4B7I8	Leucine--tRNA ligase	LOC107805395	5.6	1	122.8			18157000	0	14932000	1.10297e+07	0	7435500	14141000	7.19217e+06	1.53357
A0A1S4C3H4	leukotriene A-4 hydrolase homolog	LOC107814668	17.7	8	68.521			64508000	58947000	72356000	6.52703e+07	36823000	42706000	52595000	4.40413e+07	1.48202
A0A1S3ZX02;A0A1S3ZH00	levodione reductase-like	LOC107791299;LOC107786725	5.6	1	29.705			68072000	10124000	7496000	28564000	45095000	9821900	13122000	2.26796e+07	1.25946
A0A1S4BCZ4;A0A1S3ZJB7;Q9FXL9	L-galactono-1,4-lactone dehydrogenase, mitochondrial-like	LOC107806941	12.9	6	66.8			127770000	95745000	116540000	1.13352e+08	101040000	120560000	113180000	1.11593e+08	1.01576
A0A1S4D0A5;A0A1S4BBF7	L-galactose dehydrogenase-like isoform X1; L-galactose dehydrogenase-like	LOC107824481;LOC107806546	26.2	5	34.546			249070000	237840000	249760000	2.45557e+08	309220000	290920000	303520000	301220000	0.815207
A0A1S4APR8;A0A1S3XT40;A0A1S4CTR1;A0A1S3XGJ1;A0A1S3XFI6;A0A1S3Z1J7	light-induced protein, chloroplastic-like	LOC107800124;LOC107768503	20.9	7	34.927			551610000	535330000	530380000	5.39107e+08	768540000	800600000	727470000	7.65537e+08	0.704221
P11965;A0A1S4DJJ7	Lignin-forming anionic peroxidase; Peroxidase	LOC107830487	36.1	6	34.673			405330000	440440000	467790000	4.37853e+08	928860000	748940000	622610000	7.66803e+08	0.571011
A0A1S4DR56;A0A1S3Y7Z4	LIMR family protein At5g01460; LIMR family protein At5g01460-like isoform X1	LOC107832552;LOC107773402	2	1	56.184			0	0	5596600	1.86553e+06	6818400	8482500	8274500	7.85847e+06	0.237392
A0A1S4AQL2;A0A1S4DC13;A0A1S4CMW2;A0A1S3YKZ9	linoleate 13S-lipoxygenase 2-1, chloroplastic-like; Lipoxygenase	LOC107800325;LOC107828143	19.8	7	53.585			51644000	40397000	67207000	5.30827e+07	28322000	39612000	43337000	3.70903e+07	1.43117
A0A1S4AV32	linolenate hydroperoxide lyase, chloroplastic-like	LOC107801729	31.6	14	55.668			725990000	634030000	598810000	6.52943e+08	829280000	796150000	676120000	7.67183e+08	0.851092
A0A1S4CPY0;A0A1S4C6G0;A0A1S3XBA3	lipid phosphate phosphatase epsilon 2, chloroplastic-like	LOC107821203	8.7	1	15.604			52635000	62541000	41010000	52062000	63528000	53100000	49317000	55315000	0.941191
A0A1S3YT79	lipid transfer-like protein VAS	LOC107779483	8.1	1	15.117			97984000	98276000	75916000	9.07253e+07	148250000	135080000	113880000	1.32403e+08	0.685219
A0A1S4CYG2	lipid transfer-like protein VAS	LOC107823998	8.1	1	15.195			64264000	67668000	62288000	64740000	97551000	75875000	65927000	7.97843e+07	0.811438
A0A1S3ZSE2;A0A1S4AJ65	Lipoyl synthase, chloroplastic	LOC107789917;LOC107798233	9.9	2	41.075			0	18649000	28283000	15644000	0	0	0	0	#DIV/0!
A0A1S4BS40	LL-diaminopimelate aminotransferase, chloroplastic-like	LOC107811239	37.2	16	50.125			1628200000	1683200000	1626900000	1646100000	1672100000	1596200000	1718000000	1662100000	0.990374
A0A1S3XCC7	LL-diaminopimelate aminotransferase, chloroplastic-like	LOC107763425	31.5	3	49.645			105020000	103890000	101590000	103500000	108760000	95086000	96437000	1.00094e+08	1.03402
A0A1S4CA23	lon protease 2-like	LOC107816598	24.4	5	32.657			104370000	128500000	101400000	1.11423e+08	91761000	101830000	113410000	1.02334e+08	1.08882
A0A1S4BND5	lon protease 2-like	LOC107810160	24.5	1	32.541			0	0	0	0	0	0	0	0	#DIV/0!
A0A1S4BLB1;A0A1S4AD92	lon protease homolog, mitochondrial-like; Lon protease homolog, mitochondrial	LOC107809486;LOC107796400	2.3	2	78.34			0	0	0	0	72286000	0	71339000	47875000	0
A0A1S4CDA0;A0A1S3YXJ6	long chain acyl-CoA synthetase 1-like	LOC107817773;LOC107780949	12.4	6	74.967			93491000	79599000	88294000	87128000	63175000	78554000	97662000	79797000	1.09187
A0A1S4CLI2;A0A1S4ABN8;A0A1S4A2S1;A0A1S4A7T0	long chain acyl-CoA synthetase 4-like	LOC107820099;LOC107795838	14.7	8	73.439			120210000	142080000	131870000	1.31387e+08	133810000	139620000	145670000	139700000	0.940492
A0A1S4APE9;A0A1S4BAK0;A0A1S3YXB2	long chain acyl-CoA synthetase 6, peroxisomal; long chain acyl-CoA synthetase 6, peroxisomal-like	LOC107799911;LOC10780	9.6	4	77.039			44910000	39087000	29947000	3.79813e+07	37357000	31885000	37839000	3.56937e+07	1.06409
A0A1S3XZM5;A0A1S4CF12;A0A1S4CYN7;A0A1S4APL1;A0A1S3ZR50	LOW QUALITY PROTEIN: actin cytoskeleton-regulatory complex protein pan1-like; epidermal growth factor receptor substrate 15-like 1	LOC107770364	1.2	1	79.306			22207000	28733000	16884000	22608000	30122000	24518000	25258000	2.66327e+07	0.848882
A0A1S4B5J1;A0A1S4AID1;A0A1S3Z7B9	LOW QUALITY PROTEIN: oligouridylate-binding protein 1-like; oligouridylate-binding protein 1-like	LOC107804656;LOC10779	10.3	4	44.102			64639000	60184000	55301000	6.00413e+07	58670000	56443000	59784000	58299000	1.02989
A0A1S3YM77;A0A1S4BR42;A0A1S3XL19;A0A1S4CQK0;A0A1S4BX58;A0A1S3ZT40;A0A1S4CQ07	LOW QUALITY PROTEIN: protease Do-like 7; protease Do-like 7	LOC107777755;LOC107810941	7.9	6	119.81			25554000	20926000	26025000	2.41683e+07	26502000	26962000	29645000	27703000	0.872409
A0A1S3YC29	LOW QUALITY PROTEIN: protein transport protein SEC31 homolog B-like	LOC107774522	10.4	8	122.23			189950000	194150000	210280000	1.98127e+08	151580000	195090000	218400000	1.88357e+08	1.05187
A0A1S4D519	LOW QUALITY PROTEIN: UPF0603 protein At1g54780, chloroplastic	LOC107826018	35.5	11	31.989			1301200000	1306300000	1242400000	1283300000	1181200000	1310400000	1399900000	1.29717e+09	0.98931
A0A1S4BPE0;A0A1S4CUA6;A0A1S4DQ86;A0A1S4C3Z3;A0A1S3WXN6	LOW QUALITY PROTEIN: WD-40 repeat-containing protein MSI4-like	LOC107810461	9.4	5	54.25			138890000	136120000	167740000	1.47583e+08	170510000	123160000	160260000	151310000	0.975371
A0A1S4B1Z6	low-temperature-induced cysteine proteinase-like	LOC107803625	18.8	5	51.773			137930000	137180000	125440000	1.33517e+08	130750000	129870000	129640000	1.30087e+08	1.02637
A0A1S3XTC0	low-temperature-induced cysteine proteinase-like	LOC107768587	16.7	1	51.686			41617000	0	24252000	2.19563e+07	25855000	26011000	23754000	2.52067e+07	0.871053
A0A1S4B881;Q03681	luminal-binding protein	LOC107805460	49.4	2	73.441			27073000	27905000	27964000	2.76473e+07	24791000	0	17523000	1.41047e+07	1.96016
Q03684;A0A1S4CH14	Luminal-binding protein 4; luminal-binding protein 4	BIP4;LOC107818867	41.8	2	73.521			41379000	48726000	47405000	4.58367e+07	62979000	39507000	42780000	48422000	0.946608
A0A1S4APR3;Q03683	luminal-binding protein 4-like	LOC107799921	40.1	2	73.412			44292000	52274000	54848000	5.04713e+07	53068000	45501000	49152000	4.92403e+07	1.025
Q03685	Luminal-binding protein 5	BIP5	44	6	73.744			247160000	253740000	295280000	2.65393e+08	312880000	239940000	243760000	2.65527e+08	0.999498
A0A1S3YJK2	luminal-binding protein 5-like	LOC107776733	40.5	1	73.41			14864000	10578000	8730600	1.13909e+07	16283000	8876800	13159000	1.27729e+07	0.891797
A0A1S3Y1G1;A0A1S4DHK4;A0A1S3YWY0	luminal-binding protein 5-like	LOC107771128	43	1	73.975			7579700	7057000	8893200	7843300	8795200	9323300	9932100	9350200	0.838838
A0A1S4B7X5;Q03682	luminal-binding protein-like	LOC107805427	49.3	28	73.67			1907500000	1950900000	1862900000	1907100000	1866000000	1905100000	1897100000	1889400000	1.00937
Q43578;A0A1S3XB81;A0A1S4BJW8;A0A1S4AWH8;A0A1S3ZBG3	Lycopene beta cyclase, chloroplastic; lycopene beta cyclase, chloroplastic	LCY1;LOC107763207	14.4	5	56.066			22685000	31333000	0	18006000	21742000	30517000	29977000	27412000	0.656866
A0A1S4DL23;A0A1S3ZRT0	lycopene epsilon cyclase, chloroplastic-like; lycopene epsilon cyclase, chloroplastic	LOC107830918;LOC107789691	13.9	5	58.711			93636000	54879000	72202000	7.35723e+07	17539000	39066000	53773000	3.67927e+07	1.99965
A0A1S3XFP4	LYR motif-containing protein 4	LOC107764517	32.2	3	9.9113			74445000	73232000	65651000	7.11093e+07	94762000	69774000	83558000	82698000	0.859868
A0A1S3XLI2;A0A1S4DLQ5	Lysine--tRNA ligase	LOC107766274	24.2	12	69.346			327040000	327450000	369400000	3.41297e+08	328340000	344510000	358340000	343730000	0.992921
A0A1S4DGP2;A0A1S4ARI0;A0A1S4DG25	Lysine--tRNA ligase	LOC107829706;LOC107800449	14.3	8	65.572			166910000	171410000	177630000	1.71983e+08	139630000	130550000	190230000	153470000	1.12063
A0A1S4BXI2	Lysine--tRNA ligase	LOC107812833	19.1	1	70.819			0	0	0	0	0	0	18098000	6.03267e+06	0
A0A1S3Y0U6	lysM domain-containing GPI-anchored protein 1-like	LOC107770883	9.1	1	43.509			191380000	193560000	0	1.28313e+08	124820000	116320000	0	80380000	1.59633
A0A1S4B9H0	lysM domain-containing GPI-anchored protein 1-like	LOC107805926	9.1	2	43.476			55847000	124020000	55063000	78310000	87119000	50711000	58851000	6.55603e+07	1.19447
A0A1S4D715;A0A1S4BLD2	lysM domain-containing GPI-anchored protein 2-like	LOC107826649;LOC	8.2	2	38.272			51265000	35574000	33765000	4.02013e+07	53207000	47340000	53774000	5.14403e+07	0.781514
A0A1S3XFR3	macrophage migration inhibitory factor homolog	LOC107764538	50.4	4	12.143			431940000	179270000	567040000	392750000	307420000	415940000	345270000	356210000	1.10258
A0A1S3ZMP9;A0A1S3YDS3	macrophage migration inhibitory factor homolog	LOC107788402;LOC10777500	10.4	1	12.176			70571000	87064000	84499000	8.07113e+07	77050000	63774000	48262000	6.30287e+07	1.28055
A0A1S3ZI05	macrophage migration inhibitory factor homolog	LOC107787063	50.4	1	12.157	+		0	44443000	0	1.48143e+07	51115000	50873000	51146000	5.10447e+07	0.290223
A0A1S4CAK9	macrophage migration inhibitory factor homolog	LOC107816944	16.1	1	12.043			0	23424000	27924000	17116000	46579000	0	13701000	2.00933e+07	0.851825
A0A1S3ZYP6	Magnesium chelatase	LOC107791852	24.2	30	153.83			1045900000	1143400000	1007400000	1.06557e+09	880040000	1015100000	1132300000	1.00915e+09	1.05591
A0A1S4AX59	Magnesium chelatase	LOC107802255	24.2	2	153.89			58116000	44614000	53626000	5.21187e+07	49901000	44978000	56963000	50614000	1.02973
A0A1S4CMM1	magnesium protoporphyrin IX methyltransferase, chloroplastic-like	LOC107820682	43.1	1	35.218			38969000	51498000	44315000	4.49273e+07	30106000	36587000	43749000	36814000	1.22039
O24133;A0A1S4CN01;A0A1S4B4A9	Magnesium-chelatase subunit ChlD, chloroplastic; Mg-protoporphyrin IX chelatase	CHLD;LOC107820629	29.2	1	83.012			22474000	21113000	26937000	23508000	22769000	22586000	22940000	22765000	1.03264
A0A1S3YNG0	Magnesium-protoporphyrin IX monomethyl ester (oxidative) cyclase	LOC107777980	41.3	15	47.303			1517400000	1399800000	1466500000	1.46123e+09	1016500000	1153200000	1238300000	1136000000	1.2863
A0A1S3ZHM0	Magnesium-protoporphyrin IX monomethyl ester (oxidative) cyclase	LOC107786828	37.9	1	47.292			22644000	0	0	7548000	0	0	0	0	#DIV/0!
A0A1S3YMK6	major latex allergen Hev b 5-like	LOC107777715	43.9	3	16.129			296030000	335520000	326180000	3.19243e+08	504590000	479090000	422940000	4.68873e+08	0.680873
Q9FSF0;A0A1S3Y6M1	Malate dehydrogenase	MD1;LOC107772922	56.6	16	35.407			12039000000	12954000000	11415000000	12136000000	15346000000	14171000000	14281000000	1.45993e+10	0.831271
A0A1S4CNK5	Malate dehydrogenase	LOC107820966	66.3	20	35.676			9218200000	8391000000	9117200000	8908800000	11038000000	10376000000	9206200000	1.02067e+10	0.872836
A0A1S4AGW0	Malate dehydrogenase	LOC107797501	80.1	21	37.598			6683300000	7303100000	7999200000	7.32853e+09	6978500000	7567600000	7852000000	7.46603e+09	0.981583
A0A1S4CQ52	Malate dehydrogenase	LOC107821463	50.3	14	46.643			1780000000	1823000000	1801900000	1.80163e+09	1741300000	1780300000	1892800000	1804800000	0.998245
A0A1S4BMX4	Malate dehydrogenase	LOC107810010	51.5	2	35.439			1265800000	1309400000	1022900000	1.19937e+09	1381300000	1284100000	1263700000	1309700000	0.915757
A0A1S3ZW53	Malate dehydrogenase	LOC107791114	57.5	8	36.159			2056200000	1553200000	1890300000	1.83323e+09	2306100000	2329800000	1977400000	2.20443e+09	0.831612
A0A1S3XCK8;A0A1S4CY76;A0A1S4CBH8	Malate dehydrogenase	LOC107763505	42.8	6	35.529			1034300000	1056100000	964330000	1.01824e+09	1189300000	1166900000	1102000000	1.15273e+09	0.883329
A0A1S4B5M6	Malate dehydrogenase	LOC107804686	72	1	37.568	+		388600000	400470000	364180000	3.84417e+08	385990000	378100000	469550000	4.11213e+08	0.934835
A0A1S3YXG6	Malate dehydrogenase	LOC107780752	66.3	1	35.602			167240000	145050000	153880000	155390000	219040000	145400000	136580000	1.67007e+08	0.930442
A0A1S3Z5T7	Malate dehydrogenase	LOC107783258	48.3	1	43.472			88925000	88132000	81421000	8.61593e+07	70370000	62682000	106390000	79814000	1.0795
A0A1S4A9C7	Malate dehydrogenase	LOC107795174	56.4	1	36.951			0	0	0	0	53366000	0	0	1.77887e+07	0
A0A1S3ZM96	Malate dehydrogenase	LOC107788327	30.1	3	43.62			62759000	81793000	59152000	6.79013e+07	53206000	66263000	78578000	6.60157e+07	1.02856
A0A1S3Y9D7	Malate dehydrogenase	LOC107773752	40.1	1	35.545			58791000	51825000	46624000	5.24133e+07	56436000	53512000	56898000	5.56153e+07	0.942426
A0A1S3ZI08;A0A1S3YGR9	Malate dehydrogenase	LOC107787080;LOC107775935	31.3	5	37.648			203330000	253470000	280760000	2.45853e+08	156660000	228190000	162270000	1.82373e+08	1.34808
A0A1S3YQS9	Malate dehydrogenase [NADP], chloroplastic	LOC107778629	55.5	19	48.429			4577000000	4629100000	4415700000	4540600000	6105000000	4723500000	5114900000	5.31447e+09	0.854385
A0A1S3XVI5	Malate dehydrogenase [NADP], chloroplastic	LOC107769200	53	3	48.298			676070000	721680000	652130000	6.83293e+08	462540000	363230000	397030000	407600000	1.67638
A0A075EYQ1	Malate dehydrogenase [NADP], chloroplastic	chMDH	40.5	1	48.262			648360000	560860000	584630000	597950000	224030000	205380000	177070000	202160000	2.95781
A0A1S3YR16	Malic enzyme	LOC107778847	47.9	24	65.428			7083300000	8163000000	8209400000	7.81857e+09	3127700000	2963000000	2726200000	2.93897e+09	2.66031
A0A1S3Y729;A0A1S4B4D7;A0A1S4DCI6	Malic enzyme	LOC107772805;LOC107804419	34.3	17	70.457			548360000	624190000	645160000	6.05903e+08	558490000	615830000	515420000	5.63247e+08	1.07573
A0A1S4B7M0;A0A1S4ADZ8	Malic enzyme	LOC107805341;LOC107796436	28.8	12	66.291			315040000	315790000	306590000	3.12473e+08	249260000	278090000	298700000	275350000	1.13482
A0A1S3YGD4	Malic enzyme	LOC107775826	16.5	5	46.865			59063000	67854000	56376000	6.10977e+07	42344000	61515000	60585000	5.48147e+07	1.11462
A0A1S4CM79;A0A1S4B9C5	Malic enzyme	LOC107820287	43.3	1	65.37			52749000	47513000	59189000	5.31503e+07	85252000	67943000	89265000	80820000	0.657638
A0A1S4BAR7	Malic enzyme	LOC107806354	18.2	1	43.493			0	22617000	0	7539000	8355400	20751000	5247500	11451300	0.658353
A0A1S4DFT4;A0A1S3WY89	malignant T-cell-amplified sequence 1 homolog	LOC107829156;LOC107759207	12.7	2	20.053			19305000	0	0	6435000	0	0	0	0	#DIV/0!
A0A1S4BAT4;A0A1S3Y7B8;A0A1S4AF29;A0A1S3XQE1;A0A1S3XNP2	mannose-1-phosphate guanyltransferase alpha-B-like	LOC107806352;LOC	29.4	9	45.621			487570000	511070000	477140000	4.91927e+08	398180000	442460000	496430000	445690000	1.10374
A0A1S3Y3W2;A0A1S3XXZ8;A0A1S4BNB5;A0A1S3ZMQ1;A0A1S3XNR8	Mannose-1-phosphate guanylyltransferase	LOC107771893;LOC107770019	19.7	7	39.581			147220000	146190000	124960000	1.39457e+08	113930000	142230000	141400000	132520000	1.05234
A0A0R4X9V9	Mannose-binding lectin	MBL3	15.4	3	33.717			28466000	25763000	27945000	2.73913e+07	49449000	48874000	43903000	4.74087e+07	0.577771
A0A1S4A1E7;Q9M7J4	MAR-binding filament-like protein 1-1	LOC107792739;MFP1-1	36	29	82.19			749130000	743670000	697330000	7.30043e+08	728130000	710200000	700740000	7.13023e+08	1.02387
A0A1S4C7U3	MAR-binding filament-like protein 1-1	LOC107816043	33.2	9	82.293			260520000	230090000	231150000	2.40587e+08	246340000	246270000	248010000	2.46873e+08	0.974535
A0A1S4DGG9	mavicyanin-like	LOC107829520	14.8	2	19.589			27899000	28296000	29664000	2.86197e+07	45612000	30649000	32672000	36311000	0.788182
A0A1S3ZT55;A0A1S3ZP99	mediator of RNA polymerase II transcription subunit 28-like	LOC107790132	6.4	1	16.369			117370000	126490000	127880000	1.23913e+08	183480000	163440000	141610000	1.62843e+08	0.760936
A0A1S4AQ53	membrane steroid-binding protein 2-like	LOC107800001	24.5	3	24.936			76246000	101710000	93253000	90403000	117100000	114620000	93843000	108521000	0.833046
A0A1S3Z6X0	membrane steroid-binding protein 2-like	LOC107783717	10.6	1	25.817	+		76710000	91625000	78150000	8.21617e+07	96513000	104690000	89595000	9.69327e+07	0.847616
A0A1S4C1J1	membrane steroid-binding protein 2-like	LOC107814092	19.7	2	24.985			33170000	40211000	40705000	3.80287e+07	41924000	35642000	38786000	38784000	0.980525
A0A1S4BPE1	membrane steroid-binding protein 2-like	LOC107810434	12.8	1	25.751			0	0	0	0	0	0	0	0	#DIV/0!
A0A1S3XZK3;A0A1S4CW55	membrane steroid-binding protein 2-like; membrane steroid-binding protein 2-like isoform X1	LOC107770471;LOC107823237	22.5	2	24.757			0	0	14275000	4.75833e+06	0	0	0	0	#DIV/0!
A0A1S3WZF8	membrane-associated 30 kDa protein, chloroplastic-like	LOC107759493	39.9	14	43.579			525650000	597200000	535160000	552670000	640220000	614120000	611130000	6.21823e+08	0.888789
A0A1S4CZK1;A0A1S4D8Y0	metacaspase-4-like	LOC107824366;LOC107827320	30.5	10	45.592			538630000	678900000	481110000	5.66213e+08	847750000	724850000	698790000	757130000	0.747842
A0A1S4A127;A0A1S3YSP2	metal transporter Nramp3-like	LOC107792619;LOC107779295	5.1	2	56.151			31402000	0	0	1.04673e+07	20766000	26717000	0	1.58277e+07	0.661331
A0A1S4A8U7;A0A1S4DGN3	metal-independent phosphoserine phosphatase-like	LOC107794954;LOC1078	5.8	1	25.057			26295000	23177000	0	1.64907e+07	9880600	10532000	17754000	12722200	1.29621
A0A1S4B612;A0A1S4AZY6;A0A1S4AV58;A0A1S3Y611	Methenyltetrahydrofolate cyclohydrolase	LOC107804879;LOC107803013	20.4	5	32.173			98400000	90288000	123460000	1.04049e+08	63353000	69492000	115270000	82705000	1.25808
A0A1S4BWM5	Methionine aminopeptidase	LOC107812543	40.1	9	39.582			365790000	366540000	355900000	3.62743e+08	328030000	341920000	359860000	343270000	1.05673
A0A1S3X7K3	Methionine aminopeptidase	LOC107762171	34.5	1	39.519			38694000	37434000	31358000	3.58287e+07	63045000	48277000	0	3.71073e+07	0.965541
A0A1S4B6R7;A0A1S4DDX1	Methionine aminopeptidase; methionine aminopeptidase 1D, chloroplastic/mitochondrial-like	LOC107805026;LOC107828771	11.1	3	38.798			56785000	86674000	60861000	6.81067e+07	53227000	46332000	64860000	5.48063e+07	1.24268
A0A1S3YDV3;A0A1S3Y8H3	Methionine S-methyltransferase	LOC107775022;LOC107773392	2.5	2	121.12			0	0	0	0	0	0	0	0	#DIV/0!
A0A1S4A2K0;A0A1S4DAW8;A0A1S4CR33	Methionine--tRNA ligase	LOC107793139;LOC107827843	11	6	68.467			111670000	93939000	84873000	9.68273e+07	102550000	82151000	97019000	9.39067e+07	1.0311
A0A1S4AQC1;A0A1S4CQH1;A0A1S3YW80;A0A1S4BDQ7	Methionine--tRNA ligase	LOC107800068;LOC107821583	6.1	4	90.757			85289000	82772000	94432000	8.74977e+07	75360000	78008000	125240000	9.28693e+07	0.942159
A0A1S4BAS9	methionine--tRNA ligase, cytoplasmic-like	LOC107806349	56.2	2	10.372			0	0	0	0	0	0	0	0	#DIV/0!
A0A1S4AZH1	methyl-CpG-binding domain-containing protein 10-like	LOC107802992	26	5	55.422			118170000	105760000	82929000	1.02286e+08	136310000	74539000	88308000	99719000	1.02575
A0A1S4BIM7	methyl-CpG-binding domain-containing protein 11-like	LOC107808673	33.6	12	54.975			408160000	410700000	350720000	389860000	417860000	357710000	385250000	386940000	1.00755
A0A1S4DPY5	methyl-CpG-binding domain-containing protein 11-like	LOC107832181	17.5	3	37.577			74603000	72168000	64749000	7.05067e+07	80716000	59255000	75854000	7.19417e+07	0.980053
A0A1S4DE29	methyl-CpG-binding domain-containing protein 11-like	LOC107828622	34.7	6	37.663			71844000	65692000	60726000	6.60873e+07	71633000	62572000	68831000	6.76787e+07	0.976487
A0A1S3Y3W7	methyl-CpG-binding domain-containing protein 11-like	LOC107771897	11.9	1	34.765			0	0	0	0	0	0	0	0	#DIV/0!
A0A1S4BR49	methyl-CpG-binding domain-containing protein 11-like isoform X1	LOC107811030	17	3	36.079			65743000	67537000	54341000	6.25403e+07	75767000	64345000	65863000	6.86583e+07	0.910892
J7EQB2;J7EPU9	Methylenetetrahydrofolate reductase	LOC107808152;LOC107806175	27.7	12	67.464			562970000	584440000	583480000	5.76963e+08	496120000	472830000	539850000	5.02933e+08	1.1472
A0A1S4DQY5	Methylenetetrahydrofolate reductase	LOC107832493	22.4	4	67.117			159890000	146400000	155900000	1.54063e+08	119950000	137850000	145940000	134580000	1.14477
A0A1S3X4U8	Methylenetetrahydrofolate reductase	LOC107761305	23.6	1	67.077	+		0	0	0	0	0	0	11342000	3.78067e+06	0
A0A1S3ZX82;A0A1S4AMN3	Methylmalonate-semialdehyde dehydrogenase (CoA acylating)	LOC107791370	7.5	3	56.746			82604000	92433000	91657000	88898000	77368000	87183000	86372000	83641000	1.06285
Q948X8;A0A1S3YD06;A0A1S3ZX75	Methylthioribose-1-phosphate isomerase	CIG2;LOC107774973	13.4	3	39.569			52908000	50938000	36496000	4.67807e+07	71374000	51729000	59107000	6.07367e+07	0.770221
A0A1S4DBZ0;A0A1S3WXP6;A0A1S3Y8H2	Methyltransferase	LOC107828173;LOC107759039	12.3	5	70.236			154590000	193070000	146280000	1.64647e+08	137290000	132990000	134160000	1.34813e+08	1.22129
A0A1S4DBI8;A0A1S4D663	Methyltransferase	LOC107827872;LOC107826404	5.5	3	70.335			44089000	51745000	42175000	46003000	37281000	45487000	51795000	4.48543e+07	1.02561
A0A1S4B264;A0A1S4A4T5;A0A1S4AR74;A0A1S3ZYB5	Methyltransferase	LOC107803761;LOC107793763	7.4	4	68.518			42328000	57683000	73474000	5.78283e+07	27044000	35510000	40377000	3.43103e+07	1.68545
O24154;A0A1S4AQF6;A0A1S3XHU4	Methyltransferase	LOC107764502;LOC107800100	7.3	2	40.09			34261000	31161000	27256000	3.08927e+07	0	21532000	0	7.17733e+06	4.3042
A0A1S4CPR5	Methyltransferase	LOC107821329	6.7	1	39.74			15547000	99614000	96173000	7.04447e+07	1284500	1528100	16931000	6581200	10.7039
A0A1S3Y8F0	Methyltransferase	LOC107773510	16.9	1	26.628			0	0	0	0	0	0	0	0	#DIV/0!
A0A1S4DH13;A0A1S4C6A5	Mevalonate kinase	LOC107829822;LOC107815397	3.9	1	40.823			23845000	22155000	17127000	2.10423e+07	24326000	20269000	19278000	21291000	0.988321
A0A1S3ZFD3	MFP1 attachment factor 1-like	LOC107786219	14.6	3	20.821			94608000	101100000	82214000	9.26407e+07	109110000	102500000	88374000	9.99947e+07	0.926456
A0A1S4BEM8;A0A1S4A4U2	MFP1 attachment factor 1-like	LOC107807419;LOC107793696	18.1	2	16.361			22470000	24852000	21971000	2.30977e+07	29594000	37256000	26894000	31248000	0.739173
A0A1S3Z7S1;Q9FES7;A0A1S3XEV7;O22436	Mg-protoporphyrin IX chelatase	LOC107783891;Su-s	46.1	17	46.477			4400900000	4410300000	4161100000	4324100000	4044200000	4177800000	4326500000	4.18283e+09	1.03377
A0A1S3ZPA7	Mg-protoporphyrin IX chelatase	LOC107788874	31.1	18	83.008			794260000	815870000	811010000	8.07047e+08	925910000	823520000	844020000	8.64483e+08	0.93356
A0A097BU08	miraculin-like	LOC107816051	34.8	6	24.732			527130000	626000000	521390000	5.58173e+08	562180000	553770000	471300000	5.29083e+08	1.05498
A0A1S3XJ89	miraculin-like	LOC107765744	26.3	6	23.159			414060000	403680000	452850000	423530000	526740000	523410000	480860000	5.10337e+08	0.829903
A0A1S3XC37;A0A1S3XJ20;A0A1S4BUU7	miraculin-like	LOC107763353;LOC107765742	12.9	1	23.244			41196000	39373000	36712000	3.90937e+07	56833000	51222000	61081000	5.63787e+07	0.693412
Q9FSF4;A0A1S4C7A3	Mitochondrial 2-oxoglutarate/malate carrier protein; mitochondrial dicarboxylate/tricarboxylate transporter DTC-like	momc1;LOC1	24.6	3	31.797			351590000	359930000	343110000	3.51543e+08	226740000	300130000	319690000	2.82187e+08	1.24578
A0A1S4D117;A0A1S4C8C6;A0A1S3XRF6;A0A1S4ARF2;A0A1S3XRQ8	mitochondrial adenine nucleotide transporter ADNT1-like	LOC107824819	13.3	4	38.563			0	0	21384000	7128000	0	0	20995000	6.99833e+06	1.01853
A0A1S4DAN8;A0A097BTX9;A0A1S4BVK2;A0A1S4CF94	mitochondrial carnitine/acylcarnitine carrier-like protein; Mitochondrial carnitine/acylcarnitine carrier-like protein-like isoform 1	LOC107827620	47.8	14	30.581			878430000	945400000	907430000	910420000	775830000	895060000	994490000	888460000	1.02472
A0A1S4A5N4;Q8SF02	mitochondrial dicarboxylate/tricarboxylate transporter DTC; Dicarboxylate/tricarboxylate carrier	LOC107793974;dtc3	28.1	8	32.055			935700000	890250000	890470000	9.05473e+08	792910000	944960000	889490000	8.75787e+08	1.0339
A0A1S3X4K9	Mitochondrial import inner membrane translocase subunit	LOC107761004	19.2	1	8.7219			14509000	17478000	15253000	1.57467e+07	13758000	13754000	12069000	1.31937e+07	1.1935
A0A1S4CG27;A0A1S3YD94	mitochondrial import inner membrane translocase subunit TIM10-like	LOC107818568	10	1	9.3217			82387000	28926000	33925000	4.84127e+07	51856000	76948000	34385000	5.43963e+07	0.889999
A0A1S4CCZ4;A0A1S3YGL2	Mitochondrial import inner membrane translocase subunit Tim21	LOC107817736	7.5	2	34.416			27238000	26925000	24786000	2.63163e+07	25373000	27586000	26323000	2.64273e+07	0.9958
A0A1S4DCE1;A0A1S3XLU0	mitochondrial import inner membrane translocase subunit TIM44-2-like isoform X1	LOC107828135	7.3	2	56.99			12058000	0	0	4.01933e+06	14577000	0	0	4859000	0.827194
A0A1S4CWQ3;A0A1S4CGG2	mitochondrial import inner membrane translocase subunit TIM50-like	LOC107823458	2.5	1	40.793			60322000	59702000	0	40008000	70538000	65900000	63107000	66515000	0.601488
A0A1S3ZIV3	mitochondrial import inner membrane translocase subunit Tim9	LOC107787189	23.7	2	10.763			40003000	45229000	39486000	4.15727e+07	38262000	35583000	32431000	3.54253e+07	1.17353
A0A1S3XI19;A0A1S3XE08;A0A1S3YYF4;A0A1S4BDT3	mitochondrial import receptor subunit TOM20; mitochondrial import receptor subunit TOM20-like	LOC107765437;LOC107764083	13.4	2	22.558			23376000	23256000	24095000	2.35757e+07	22783000	25333000	28500000	2.55387e+07	0.923136
A0A1S4CG96;A0A1S3YLY7;A0A1S4BBM5;A0A1S3Y2M1	mitochondrial import receptor subunit TOM40-1-like	LOC107818614;LOC	4.8	1	34.518			60221000	36540000	42896000	4.65523e+07	28136000	0	0	9.37867e+06	4.96364
A0A1S4A9Q5	mitochondrial import receptor subunit TOM7-1	LOC107795240	20.8	1	8.2287			11459000	15664000	11188000	1.27703e+07	12928000	14592000	13277000	13599000	0.939064
A0A1S4DGA3	mitochondrial import receptor subunit TOM9-2	LOC107829582	23.6	2	10.799			29087000	27718000	26506000	2.77703e+07	22409000	29330000	25168000	2.56357e+07	1.08327
A0A1S4D637	mitochondrial outer membrane protein porin of 34 kDa-like	LOC107826411	28.3	5	29.449			165180000	163620000	175630000	1.68143e+08	159450000	164030000	175500000	1.66327e+08	1.01092
A0A1S3Z2G1	mitochondrial outer membrane protein porin of 34 kDa-like	LOC107782265	28.3	1	29.514			0	8828800	0	2.94293e+06	8234200	0	11142000	6.45873e+06	0.455652
A0A1S4CFG1	mitochondrial outer membrane protein porin of 36 kDa-like	LOC107818419	30.1	6	29.347			52805000	55782000	50183000	5.29233e+07	52868000	51268000	60318000	54818000	0.965437
A0A1S4BTT2;A0A1S4BHR9;A0A1S4CV55;A0A1S4A4T3;A0A1S4A7Q4	mitochondrial phosphate carrier protein 3, mitochondrial-like	LOC107811807	40.7	14	39.087			972920000	1005200000	978910000	9.85677e+08	736450000	850150000	868990000	818530000	1.2042
A0A1S3YU75	mitochondrial phosphate carrier protein 3, mitochondrial-like	LOC107779610	36.4	2	43.829			98861000	110490000	108340000	105897000	102610000	108020000	129430000	1.13353e+08	0.93422
A0A1S4CVQ8;A0A1S4C9H5	Mitochondrial proton/calcium exchanger protein; LETM1 and EF-hand domain-containing protein 1, mitochondrial-like	LOC107823016	8.5	3	44.362			21100000	20093000	20607000	20600000	26963000	20928000	24288000	2.40597e+07	0.856205
A0A1S3XDD7;A0A1S4A0J3;A0A1S3XKP1;A0A1S4CK97;A0A1S4B0F0	Mitochondrial pyruvate carrier	LOC107763801;LOC107792424	31	2	7.855			49864000	43251000	35348000	42821000	36213000	36913000	40896000	3.80073e+07	1.12665
A0A1S3ZVC1	Mitochondrial pyruvate carrier	LOC107790863	7.6	1	11.719			0	0	0	0	0	0	15705000	5235000	0
A0A1S4CGB1;A0A1S4C887;A0A1S3Y7J8;A0A1S4BU20	Mitochondrial Rho GTPase	LOC107818647;LOC107816271	18.8	9	71.626			97959000	68781000	91829000	8.61897e+07	102960000	95692000	84964000	9.45387e+07	0.911687
A0A1S4D3J2;A0A1S4ATH7	mitochondrial uncoupling protein 1-like	LOC107825495;LOC107801267	7.9	2	32.565			9361800	0	0	3120600	0	0	6723300	2241100	1.39244
A0A1S3YE85;A0A1S4AI50	Mitochondrial-processing peptidase subunit alpha	LOC107775304;LOC1077	24.6	9	54.648			217530000	208950000	235980000	220820000	151070000	226710000	208110000	1.95297e+08	1.13069
A0A1S4AVT9;A0A1S4A843	Mitochondrial-processing peptidase subunit alpha	LOC107801938;LOC1077	12.4	3	53.274			32627000	32322000	25920000	3.02897e+07	34563000	20044000	28632000	2.77463e+07	1.09166
A0A1S4DFV8;Q40532;O04362;A0A1S3Z5Y0;A0A1S4DM95;Q3C254;A0A1S4CRQ7;A0A1S4AN76	Mitogen-activated protein kinase; Mitogen-activated protein kinase homolog NTF4	LOC107829388;NTF4	9.2	3	45.068			24294000	13694000	29662000	22550000	8538800	0	16392000	8.31027e+06	2.71351
A0A1S4BPP4;A0A1S4BD97	mitotic checkpoint protein BUB3.1-like; mitotic checkpoint protein BUB3.1	LOC107810550;LOC107807022	6.2	2	37.786			22519000	22895000	0	15138000	24048000	16368000	14208000	18208000	0.831393
A0A1S4BS12	MLP-like protein 423	LOC107811017	76.3	14	16.848			2428500000	2376700000	2249500000	2.35157e+09	2148700000	1964100000	1952700000	2.02183e+09	1.16309
A0A1S4ATK0	MLP-like protein 423	LOC107801079	73.7	1	16.825			144010000	174560000	200080000	1.72883e+08	228980000	147660000	124580000	1.67073e+08	1.03478
A0A1S4DIF6	molybdenum cofactor sulfurase-like	LOC107830211	1.3	1	72.63			0	44581000	0	1.48603e+07	39556000	39873000	39977000	39802000	0.373356
A0A1S4BXC5	Molybdopterin biosynthesis protein CNX1	LOC107812843	28	11	70.342			137190000	141210000	120340000	1.32913e+08	204620000	166770000	155380000	175590000	0.756953
A0A1S4CUD0	Molybdopterin biosynthesis protein CNX1	LOC107822561	18	3	70.298			23421000	25634000	27108000	2.53877e+07	30282000	36206000	28573000	31687000	0.801201
A0A1S4B7K9;A0A1S4BGH4	monocopper oxidase-like protein SKU5	LOC107805343;LOC107807992	14.2	6	66.554			209680000	198080000	177700000	1.95153e+08	256330000	261340000	268720000	262130000	0.744491
A0A1S3YUT4	monodehydroascorbate reductase	LOC107779915	71.2	24	47.14			5562400000	5692200000	5500500000	5.58503e+09	6481300000	6244700000	6282100000	6.33603e+09	0.881472
A0A1S4CGN9	monodehydroascorbate reductase 4, peroxisomal-like	LOC107818762	15.6	6	52.774			109130000	117060000	105280000	110490000	73721000	126460000	114450000	104877000	1.05352
A0A1S3XT72	monodehydroascorbate reductase 4, peroxisomal-like	LOC107768281	13.7	1	52.605			27001000	37207000	22689000	2.89657e+07	24164000	19907000	26113000	2.33947e+07	1.23813
A0A1S4DC34	monodehydroascorbate reductase 5, mitochondrial-like	LOC107828222	46.1	1	53.388			0	48230000	62764000	36998000	58659000	73385000	57604000	63216000	0.585263
A0A1S4CLD7	monodehydroascorbate reductase 5, mitochondrial-like isoform X1	LOC107820316	46.1	17	53.361			1174900000	1077200000	1152600000	1134900000	1445300000	1383200000	1337300000	1388600000	0.817298
A0A1S3YG63	monodehydroascorbate reductase-like	LOC107775678	66.6	3	47.07			414600000	348600000	329850000	364350000	376630000	504110000	449210000	4.43317e+08	0.821873
A0A1S4BUQ4	monothiol glutaredoxin-S10-like isoform X1	LOC107812087	40	7	20.05			753640000	711350000	715760000	7.26917e+08	891740000	751270000	749940000	797650000	0.911323
A0A1S4D128;A0A1S4CEJ7	monothiol glutaredoxin-S17-like	LOC107824685;LOC107818154	12.7	4	52.498			51111000	43400000	47394000	4.73017e+07	50339000	42045000	52897000	48427000	0.976762
A0A1S4BT20;A0A1S4BJ59	motile sperm domain-containing protein 2-like isoform X1; motile sperm domain-containing protein 2-like	LOC107811586;LO	11.4	2	30.682			20872000	16603000	20939000	1.94713e+07	30144000	17852000	23445000	2.38137e+07	0.817654
A0A075QVP3;A0A075QLS4	mRNA cap-binding protein	nCBP1-S;nCBP1	6.6	1	24.488			0	0	0	0	0	0	0	0	#DIV/0!
A0A1S3Y855;Q66UV4;A0A075QQ08	mRNA cap-binding protein; Eukaryotic translation initiation factor 4E-2	LOC107773302;eIF4E	6	1	24.9			20931000	0	15354000	12095000	15302000	20417000	7413100	1.43774e+07	0.841253
A0A1S3ZEW7	mulatexin-like	LOC107786099	6.7	1	18.036			31876000	38916000	37001000	35931000	47999000	41632000	37875000	42502000	0.845396
A0A1S3XWC8;A0A1S3X5E2;A0A1S3Y8D4;A0A1S4BWW8;A0A1S3ZT43;A0A1S3YNU2	multiple organellar RNA editing factor 2, chloroplastic-like	LOC107769467	7.4	2	25.984			105020000	109140000	97571000	1.0391e+08	101560000	101760000	105600000	1.02973e+08	1.0091
A0A1S3ZID4;A0A1S4A9C2;A0A1S3ZW24	multiple organellar RNA editing factor 8, chloroplastic/mitochondrial-like	LOC107787019	3.9	2	54.751			73949000	66488000	65510000	68649000	85775000	67673000	75426000	7.62913e+07	0.899827
A0A1S4B4J0	multiple organellar RNA editing factor 8, chloroplastic/mitochondrial-like	LOC107804458	5.1	1	43.659			0	0	0	0	0	0	0	0	#DIV/0!
A0A1S3XIK8;A0A1S4CG92	multiprotein-bridging factor 1b; multiprotein-bridging factor 1b-like	LOC107765599;LOC107818677	34.5	1	15.259			32031000	17868000	24795000	24898000	30913000	10910000	17321000	1.97147e+07	1.26292
A0A1S4DC25	multiprotein-bridging factor 1b-like	LOC107828038	24.5	1	15.271			81668000	65350000	52378000	6.64653e+07	50974000	0	0	1.69913e+07	3.91172
D7P234;A0A1S4CGW4	MYC1b transcription factor; transcription factor MYC2-like	LOC107820916;LOC107818835	1.3	1	74.372	+		0	0	0	0	0	0	0	0	#DIV/0!
A0A1S4AZ99	myosin heavy chain, cardiac muscle isoform-like	LOC107802930	30.1	34	147.8			535480000	526240000	450230000	5.03983e+08	849820000	722760000	738030000	7.70203e+08	0.654351
A0A1S4ARK9	myosin-11-like	LOC107800630	3.2	1	159.4			0	0	0	0	0	0	0	0	#DIV/0!
A0A1S3X1A6	myosin-9-like	LOC107759966	28.1	5	147.98			62722000	61570000	51400000	58564000	129740000	91137000	67088000	9.59883e+07	0.610116
A0A1S4BFI3	NAC domain-containing protein 86-like	LOC107807727	1.5	1	75.261			2333300000	2092500000	0	1.47527e+09	2522700000	5420300000	3013700000	3.65223e+09	0.403935
A0A1S4DD20	N-acyl-aliphatic-L-amino acid amidohydrolase	LOC107828516	20.4	8	50.074			122580000	121090000	120060000	1.21243e+08	139100000	122790000	131860000	131250000	0.923759
A0A1S4BJ94;A0A1S3XH26	NAD(P)H dehydrogenase (quinone)	LOC107808878	45.3	7	21.547			153860000	181350000	197810000	1.77673e+08	145030000	170030000	190550000	1.68537e+08	1.05421
A0A1S4AKG4;A0A1S3YSA1;A0A1S4DJ81	NAD(P)H dehydrogenase (quinone)	LOC107798682;LOC107779006	31	4	21.982			117050000	115450000	108780000	113760000	114710000	104450000	111570000	1.10243e+08	1.0319
A0A1S3ZFN7;A0A1S4A422;A0A1S4DFW8	NAD(P)H dehydrogenase (quinone)	LOC107786342;LOC107793479	32	3	21.59			83980000	76339000	73887000	7.80687e+07	72425000	73065000	82963000	76151000	1.02518
A0A1S3X5D0;A0A1S3ZGJ5	NAD(P)H dehydrogenase (quinone)	LOC107761412	45.3	1	21.619			24193000	14107000	18601000	18967000	19975000	17150000	23646000	20257000	0.936318
A0A1S4BAZ2;A0A1S3X065	NAD(P)H-hydrate epimerase	LOC107806353;LOC107759856	10.6	4	60.094			22610000	20027000	23360000	21999000	19783000	23684000	20845000	2.14373e+07	1.0262
A0A1S4DDY8;A0A1S4BJK2	NAD(P)H-quinone oxidoreductase subunit M, chloroplastic	LOC107828798	15.9	3	24.135			170100000	152250000	154640000	1.58997e+08	174820000	172890000	159370000	1.69027e+08	0.94066
A0A1S3X1A8;A0A1S4BR11	NAD(P)H-quinone oxidoreductase subunit N, chloroplastic-like	LOC107760205	30.9	6	27.744			188740000	200180000	199370000	1.96097e+08	187660000	171670000	208040000	1.89123e+08	1.03687
A0A1S3ZGX3	NAD(P)H-quinone oxidoreductase subunit O, chloroplastic-like	LOC107786574	19.7	1	17.955			232050000	194690000	230450000	2.19063e+08	211240000	205450000	282310000	233000000	0.940186
A0A1S4CVG6	NAD(P)H-quinone oxidoreductase subunit O, chloroplastic-like	LOC107823034	19.7	3	17.826			140330000	119810000	127860000	1.29333e+08	127360000	134490000	140700000	1.34183e+08	0.963855
A0A1S4BTJ3	NAD(P)H-quinone oxidoreductase subunit S, chloroplastic-like	LOC107811723	28	6	26.857			176060000	151890000	172470000	1.66807e+08	212950000	206450000	188120000	2.02507e+08	0.82371
A0A1S4DQV4	NAD(P)H-quinone oxidoreductase subunit S, chloroplastic-like	LOC107832469	24.7	2	26.963			89241000	82369000	66877000	7.94957e+07	98613000	79555000	91450000	8.98727e+07	0.884537
A0A1S3XRX3;A0A1S3YXP2	NAD(P)H-quinone oxidoreductase subunit U, chloroplastic-like	LOC107768034	11.6	2	24.887			23619000	31804000	29280000	2.82343e+07	21551000	23531000	30242000	25108000	1.12452
Q9ZNX1;A0A1S3Z488;A0A1S3YYZ0	NAD-dependent isocitrate dehydrogenase; isocitrate dehydrogenase [NAD] regulatory subunit 1, mitochondrial	LOC107807928;LOC1077	18.6	5	40.277			110980000	119330000	122470000	1.17593e+08	111320000	114860000	104080000	1.10087e+08	1.06819
A0A1S4BQX6	NAD-dependent malic enzyme 62 kDa isoform, mitochondrial-like	LOC107810978	19.6	3	38.941			28973000	47063000	41127000	3.90543e+07	30539000	29694000	34171000	31468000	1.24108
A0A1S4DFX0;A0A1S3YXF7	NADH dehydrogenase [ubiquinone] 1 alpha subcomplex assembly factor 3	LOC107829281	13.8	2	19.406			10486000	16680000	18329000	15165000	0	0	0	0	#DIV/0!
A0A1S3XY97	NADH dehydrogenase [ubiquinone] 1 alpha subcomplex subunit 13	LOC107770117	35.7	5	16.159			39344000	55594000	44122000	4.63533e+07	28580000	46191000	58285000	44352000	1.04512
A0A1S4DP36;A0A1S3YLE3	NADH dehydrogenase [ubiquinone] 1 alpha subcomplex subunit 2-like	LOC107831908	33.3	3	10.945			124130000	135190000	132000000	130440000	112980000	128520000	128830000	1.23443e+08	1.05668
A0A1S4BWD5;A0A1S4D891	NADH dehydrogenase [ubiquinone] 1 alpha subcomplex subunit 2-like	LOC107812560	32.7	1	11.117			22791000	0	0	7597000	0	0	0	0	#DIV/0!
A0A1S3XKH8;A0A1S3X7Q5	NADH dehydrogenase [ubiquinone] 1 alpha subcomplex subunit 8-B-like	LOC107766124	14.3	2	11.997			85482000	80485000	71003000	78990000	99623000	90294000	103740000	9.78857e+07	0.806962
A0A1S4BTZ6;A0A1S3X8F1;A0A1S3YY42	NADH dehydrogenase [ubiquinone] 1 alpha subcomplex subunit 9, mitochondrial	LOC107811871	28.7	9	43.51			261780000	278040000	268030000	2.69283e+08	217440000	222040000	296020000	2.45167e+08	1.09837
A0A1S4BUC0;A0A1S3XJ54	NADH dehydrogenase [ubiquinone] 1 beta subcomplex subunit 10-A-like	LOC107811984	20.8	2	12.536			54751000	57428000	40752000	50977000	28443000	30752000	33404000	3.08663e+07	1.65154
A0A1S3ZYZ9	NADH dehydrogenase [ubiquinone] 1 beta subcomplex subunit 3-B-like	LOC107791922	38	2	7.8839			10412000	11736000	0	7.38267e+06	0	0	6938200	2.31273e+06	3.19218
A0A1S3XK17;A0A1S3XY65;A0A1S4D7K0	NADH dehydrogenase [ubiquinone] 1 beta subcomplex subunit 7	LOC107766065	34.7	3	11.193			88690000	110220000	98133000	9.90143e+07	118640000	105780000	134000000	1.19473e+08	0.828757
A0A1S3YD39;A0A1S3ZX03;A0A1S3ZFJ5;A0A1S3WYJ4	NADH dehydrogenase [ubiquinone] 1 beta subcomplex subunit 9	LOC107774984	37.8	4	13.837			64413000	74187000	65575000	6.80583e+07	49668000	65811000	60974000	5.88177e+07	1.15711
A0A1S4D531;A0A1S4AAX1;A0A1S4C2Y6;A0A1S3YVP6	NADH dehydrogenase [ubiquinone] flavoprotein 1, mitochondrial	LOC107826059	38.6	14	53.613			462020000	476890000	524410000	4.87773e+08	508500000	477610000	462030000	4.82713e+08	1.01048
A0A1S4D1F5;A0A1S4CHV1	NADH dehydrogenase [ubiquinone] flavoprotein 2, mitochondrial-like	LOC107824942	12.1	3	28.615			136230000	77784000	101120000	1.05045e+08	63787000	32018000	104010000	66605000	1.57713
[truncated: 1,825 more rows]

## Sheet: Table S4
Table S4. List of expressed proteins present in FML -5h and Dark-5h exposed plants after filtering
[truncated: 2,020 more rows]

## Sheet: Table S5
Table S5. Differentially expressed proteins between FML and dark treated plants (FC>1.5; p<0.05)
[truncated: 32 more rows]
